# Supplementary material for: Yeast eIF2A has a minimal role in translation initiation and uORF-mediated translational control in vivo
Source: eLife. 2024 Jan 24;12:RP92916. doi: 10.7554/eLife.92916 (PMC10945734; doi:10.7554/eLife.92916)
Supplement: Figure 2—source data 1. [file elife-92916-fig2-data1.xlsx]

## Sheet: Sheet1
gene_ID	TE Change (log2FoldChange eIF2A∆ vs WT)	padj (FDR)
YAL001C	0.15599	0.999841
YAL002W	0.280521	0.999841
YAL003W	-0.0359032	0.999841
YAL005C	0.0288514	0.999841
YAL007C	-0.220231	0.999841
YAL008W	-0.179602	0.999841
YAL009W	-0.119707	0.999841
YAL010C	-0.196824	0.999841
YAL011W	0.402319	0.999841
YAL012W	-0.0310023	0.999841
YAL013W	-0.00675907	0.999841
YAL014C	-0.00680569	0.999841
YAL015C	-0.572522	0.999841
YAL016W	0.00450824	0.999841
YAL017W	-0.00944809	0.999841
YAL019W	-0.0963262	0.999841
YAL020C	0.151705	0.999841
YAL021C	0.202863	0.999841
YAL022C	-0.369797	0.999841
YAL023C	-0.0957128	0.999841
YAL024C	0.24585	0.999841
YAL025C	0.101149	0.999841
YAL026C	-0.0230906	0.999841
YAL026C-A	-0.223113	0.999841
YAL027W	-0.838907	0.999841
YAL028W	0.121189	0.999841
YAL029C	0.0999797	0.999841
YAL030W	0.449298	0.999841
YAL031C	0.25112	0.999841
YAL032C	0.324423	0.999841
YAL033W	-0.255568	0.999841
YAL034C	-0.18163	0.999841
YAL034W-A	0.274352	0.999841
YAL035W	0.213046	0.999841
YAL036C	-0.00804922	0.999841
YAL037W	0.652342	0.999841
YAL038W	-0.0692756	0.999841
YAL039C	0.124887	0.999841
YAL040C	-0.0183068	0.999841
YAL041W	0.157534	0.999841
YAL042W	0.0435405	0.999841
YAL043C	0.192577	0.999841
YAL044C	-0.0558949	0.999841
YAL044W-A	0.102725	0.999841
YAL046C	0.320128	0.999841
YAL047C	-0.524241	0.999841
YAL049C	0.28001	0.999841
YAL051W	0.293167	0.999841
YAL053W	-0.168276	0.999841
YAL054C	-0.045785	0.999841
YAL055W	-0.208439	0.999841
YAL056W	-0.271796	0.999841
YAL058W	-0.149477	0.999841
YAL059W	0.0667122	0.999841
YAL060W	-0.035483	0.999841
YAL061W	0.00506595	0.999841
YAL062W	-0.562168	0.999841
YAL063C	4.04921	0.999841
YAL064W-B	0.308083	0.999841
YAR002C-A	0.0511655	0.999841
YAR002W	0.00723153	0.999841
YAR003W	-0.0218297	0.999841
YAR007C	-0.00982716	0.999841
YAR008W	-0.119423	0.999841
YAR014C	-0.0946771	0.999841
YAR015W	0.210572	0.999841
YAR018C	-0.0742216	0.999841
YAR019C	-0.0204825	0.999841
YAR023C	3.61066	0.999841
YAR027W	0.0344166	0.999841
YAR028W	-0.11152	0.999841
YAR029W	-0.351049	0.999841
YAR031W	0.0190074	0.999841
YAR033W	-0.148609	0.999841
YAR035W	-0.514343	0.999841
YAR042W	0.251684	0.999841
YAR050W	3.15028	0.999841
YAR071W	0.000299022	0.999841
YBL001C	-0.105034	0.999841
YBL002W	-0.122096	0.999841
YBL003C	-0.0110048	0.999841
YBL004W	0.128981	0.999841
YBL005W	-0.107179	0.999841
YBL006C	-0.13064	0.999841
YBL007C	0.0280183	0.999841
YBL008W	0.330803	0.999841
YBL009W	0.0417371	0.999841
YBL010C	0.163767	0.999841
YBL011W	0.0149297	0.999841
YBL014C	0.336219	0.999841
YBL015W	-0.105509	0.999841
YBL016W	-0.086877	0.999841
YBL017C	-0.148798	0.999841
YBL018C	0.319539	0.999841
YBL019W	0.0453336	0.999841
YBL020W	-0.0165778	0.999841
YBL021C	-0.413625	0.999841
YBL022C	0.146399	0.999841
YBL023C	0.0879924	0.999841
YBL024W	0.0857111	0.999841
YBL025W	0.215129	0.999841
YBL026W	0.276161	0.999841
YBL027W	-0.00204907	0.999841
YBL028C	0.111972	0.999841
YBL029C-A	0.11732	0.999841
YBL029W	0.537365	0.999841
YBL030C	-0.103809	0.999841
YBL031W	0.095789	0.999841
YBL032W	-0.248822	0.999841
YBL033C	0.0596773	0.999841
YBL034C	0.169544	0.999841
YBL035C	0.0873076	0.999841
YBL036C	0.0146303	0.999841
YBL037W	0.361437	0.999841
YBL038W	-0.0195112	0.999841
YBL039C	0.15375	0.999841
YBL039W-B	0.0172445	0.999841
YBL040C	-0.126099	0.999841
YBL041W	0.0328483	0.999841
YBL042C	0.0251179	0.999841
YBL045C	0.0416242	0.999841
YBL046W	0.483938	0.999841
YBL047C	0.0334835	0.999841
YBL050W	-0.193605	0.999841
YBL051C	0.216451	0.999841
YBL052C	-0.253944	0.999841
YBL054W	0.12415	0.999841
YBL055C	-0.125355	0.999841
YBL056W	0.0346403	0.999841
YBL057C	0.0431285	0.999841
YBL058W	0.116829	0.999841
YBL059C-A	0.256129	0.999841
YBL059W	0.202638	0.999841
YBL060W	-0.359098	0.999841
YBL061C	-0.141733	0.999841
YBL063W	-0.14144	0.999841
YBL064C	0.00531077	0.999841
YBL066C	-0.369629	0.999841
YBL067C	-0.25311	0.999841
YBL068W	-0.260729	0.999841
YBL071W-A	-0.0234196	0.999841
YBL072C	-0.160066	0.999841
YBL074C	0.268912	0.999841
YBL075C	0.423106	0.999841
YBL076C	0.0891465	0.999841
YBL078C	0.782352	0.999841
YBL079W	-0.0320267	0.999841
YBL080C	0.394183	0.999841
YBL081W	-0.00586767	0.999841
YBL084C	-0.090063	0.999841
YBL085W	0.180745	0.999841
YBL086C	0.138913	0.999841
YBL087C	-0.138176	0.999841
YBL088C	-0.097799	0.999841
YBL089W	-0.186751	0.999841
YBL090W	0.205243	0.999841
YBL091C	0.0453651	0.999841
YBL091C-A	-0.0524715	0.999841
YBL092W	-0.161004	0.999841
YBL093C	-0.0187505	0.999841
YBL095W	0.116994	0.999841
YBL097W	0.475102	0.999841
YBL098W	-0.0191302	0.999841
YBL099W	-0.19011	0.999841
YBL101C	0.129956	0.999841
YBL102W	-0.296429	0.999841
YBL103C	-0.35143	0.999841
YBL104C	0.252137	0.999841
YBL105C	-0.0981966	0.999841
YBL106C	-0.495754	0.999841
YBL107C	0.180098	0.999841
YBL113C	0.0508641	0.999841
YBR001C	-0.0303364	0.999841
YBR002C	0.172008	0.999841
YBR003W	-0.312206	0.999841
YBR004C	-0.37013	0.999841
YBR005W	0.152898	0.999841
YBR006W	0.131749	0.999841
YBR007C	-0.0490674	0.999841
YBR008C	-2.63624	0.999841
YBR009C	0.064931	0.999841
YBR010W	-0.0416823	0.999841
YBR011C	0.0381644	0.999841
YBR012C	-0.429987	0.999841
YBR013C	0.0948985	0.999841
YBR014C	-0.0257657	0.999841
YBR015C	-0.0115928	0.999841
YBR016W	-0.0234952	0.999841
YBR017C	0.0990606	0.999841
YBR018C	-0.0200937	0.999841
YBR019C	-5.33261	0.999841
YBR020W	-0.474398	0.999841
YBR021W	-0.194319	0.999841
YBR022W	-0.240567	0.999841
YBR023C	0.0649173	0.999841
YBR024W	-0.0702295	0.999841
YBR025C	0.0342224	0.999841
YBR026C	-0.0476166	0.999841
YBR028C	-0.359919	0.999841
YBR029C	-0.0694125	0.999841
YBR030W	-0.121282	0.999841
YBR031W	-0.235907	0.999841
YBR033W	-0.709297	0.999841
YBR034C	0.062937	0.999841
YBR035C	-0.0224003	0.999841
YBR036C	-0.344177	0.999841
YBR037C	-0.390881	0.999841
YBR038W	0.0307177	0.999841
YBR039W	-0.0780737	0.999841
YBR041W	0.125442	0.999841
YBR042C	0.0282146	0.999841
YBR043C	0.139034	0.999841
YBR044C	0.0563782	0.999841
YBR045C	-1.33691	0.999841
YBR046C	0.244212	0.999841
YBR047W	-1.5039	0.999841
YBR048W	-0.105227	0.999841
YBR049C	0.19057	0.999841
YBR050C	-0.00237011	0.999841
YBR052C	0.0428887	0.999841
YBR053C	0.128393	0.999841
YBR054W	-0.209131	0.999841
YBR055C	0.283654	0.999841
YBR056W	0.019039	0.999841
YBR056W-A	-0.841686	0.999841
YBR057C	-0.0603647	0.999841
YBR058C	0.0889628	0.999841
YBR058C-A	-0.00024311	0.999841
YBR059C	-0.0123767	0.999841
YBR060C	0.175036	0.999841
YBR061C	0.075102	0.999841
YBR062C	-0.0796387	0.999841
YBR063C	3.2708	0.999841
YBR065C	0.217112	0.999841
YBR066C	0.0774291	0.999841
YBR067C	0.00954105	0.999841
YBR068C	-0.12858	0.999841
YBR069C	-0.155111	0.999841
YBR070C	-0.341184	0.999841
YBR071W	0.251501	0.999841
YBR072W	0.232719	0.999841
YBR073W	0.0544997	0.999841
YBR074W	0.191238	0.999841
YBR076C-A	-0.284183	0.999841
YBR077C	-0.254678	0.999841
YBR078W	-0.193815	0.999841
YBR079C	0.173824	0.999841
YBR080C	0.0530219	0.999841
YBR081C	0.0876201	0.999841
YBR082C	0.00449214	0.999841
YBR083W	0.265065	0.999841
YBR084C-A	0.0135491	0.999841
YBR084W	0.0426874	0.999841
YBR085C-A	-0.157507	0.999841
YBR085W	-0.116671	0.999841
YBR086C	-0.204177	0.999841
YBR087W	0.112543	0.999841
YBR088C	0.132536	0.999841
YBR089C-A	-0.0386611	0.999841
YBR091C	-0.834625	0.999841
YBR092C	0.0238392	0.999841
YBR093C	-0.0424935	0.999841
YBR094W	0.196409	0.999841
YBR095C	0.0911952	0.999841
YBR096W	-0.0375596	0.999841
YBR097W	0.423919	0.999841
YBR098W	-0.540415	0.999841
YBR099C	-0.126582	0.999841
YBR101C	0.129651	0.999841
YBR102C	-0.169208	0.999841
YBR103W	0.0158244	0.999841
YBR104W	-0.0414507	0.999841
YBR105C	-0.0677565	0.999841
YBR106W	-0.0358761	0.999841
YBR107C	-0.882012	0.999841
YBR108W	0.235175	0.999841
YBR109C	-0.00656106	0.999841
YBR110W	-0.00387908	0.999841
YBR111C	0.0377552	0.999841
YBR111W-A	0.5704	0.999841
YBR112C	0.177941	0.999841
YBR114W	0.165199	0.999841
YBR115C	-0.641834	0.999841
YBR118W	0.00861952	0.999841
YBR119W	-0.0871046	0.999841
YBR120C	-0.248622	0.999841
YBR121C	0.0245338	0.999841
YBR122C	0.103162	0.999841
YBR123C	0.2254	0.999841
YBR125C	-0.140834	0.999841
YBR126C	0.0341244	0.999841
YBR127C	-0.00757279	0.999841
YBR128C	-0.270231	0.999841
YBR129C	0.173683	0.999841
YBR130C	0.407405	0.999841
YBR131W	0.283967	0.999841
YBR132C	-0.295858	0.999841
YBR133C	-0.0619826	0.999841
YBR135W	-0.453367	0.999841
YBR136W	-0.0424054	0.999841
YBR137W	0.00216164	0.999841
YBR138C	-0.333751	0.999841
YBR139W	-0.184325	0.999841
YBR140C	0.241301	0.999841
YBR141C	0.693425	0.999841
YBR142W	0.0462799	0.999841
YBR143C	-0.0369852	0.999841
YBR145W	-0.839965	0.999841
YBR146W	-0.283065	0.999841
YBR147W	-1.16417	0.999841
YBR148W	-2.14238	0.999841
YBR149W	-0.0884885	0.999841
YBR150C	-0.125402	0.999841
YBR151W	-0.317449	0.999841
YBR152W	0.244462	0.999841
YBR153W	0.167831	0.999841
YBR154C	0.00770818	0.999841
YBR155W	-0.0207276	0.999841
YBR156C	0.261248	0.999841
YBR157C	-1.16077	0.999841
YBR158W	0.106463	0.999841
YBR159W	-0.159164	0.999841
YBR160W	0.0717553	0.999841
YBR161W	0.242886	0.999841
YBR162C	-0.0812574	0.999841
YBR162W-A	-0.0499282	0.999841
YBR163W	0.0498801	0.999841
YBR164C	0.0931789	0.999841
YBR165W	0.139942	0.999841
YBR166C	0.0343596	0.999841
YBR167C	-0.0723759	0.999841
YBR168W	-0.466928	0.999841
YBR169C	-0.190459	0.999841
YBR170C	0.0492714	0.999841
YBR171W	0.196694	0.999841
YBR172C	0.0568992	0.999841
YBR173C	0.124151	0.999841
YBR175W	0.0251326	0.999841
YBR176W	-0.0729668	0.999841
YBR177C	-0.0168557	0.999841
YBR179C	-0.0433071	0.999841
YBR181C	-0.0324604	0.999841
YBR182C	0.0938905	0.999841
YBR183W	0.0625498	0.999841
YBR184W	1.03941	0.999841
YBR185C	0.0354701	0.999841
YBR186W	0.343957	0.999841
YBR187W	-0.101227	0.999841
YBR188C	-0.570835	0.999841
YBR189W	-0.0878724	0.999841
YBR192W	0.0923478	0.999841
YBR193C	-0.401963	0.999841
YBR194W	0.0388196	0.999841
YBR195C	-0.14697	0.999841
YBR196C	-0.0669073	0.999841
YBR197C	-0.274085	0.999841
YBR198C	0.110863	0.999841
YBR199W	0.0301876	0.999841
YBR200W	0.0442938	0.999841
YBR201C-A	1.95608	0.999841
YBR201W	-0.184244	0.999841
YBR202W	-0.147415	0.999841
YBR203W	-0.219465	0.999841
YBR204C	-0.02168	0.999841
YBR205W	0.0431623	0.999841
YBR207W	-0.10816	0.999841
YBR208C	-0.228088	0.999841
YBR210W	0.124731	0.999841
YBR211C	-0.135559	0.999841
YBR212W	-0.257694	0.999841
YBR213W	0.322601	0.999841
YBR214W	0.0978509	0.999841
YBR215W	0.137755	0.999841
YBR216C	0.207007	0.999841
YBR217W	0.263303	0.999841
YBR218C	-0.0462082	0.999841
YBR221C	-0.224151	0.999841
YBR222C	-0.102696	0.999841
YBR223C	0.196822	0.999841
YBR225W	0.0482537	0.999841
YBR228W	-0.307412	0.999841
YBR229C	0.00160573	0.999841
YBR230C	-0.190513	0.999841
YBR230W-A	-0.634834	0.999841
YBR231C	-0.151017	0.999841
YBR233W	-0.145141	0.999841
YBR233W-A	-0.237506	0.999841
YBR234C	-0.169224	0.999841
YBR235W	-0.276832	0.999841
YBR236C	-0.0380382	0.999841
YBR237W	0.061833	0.999841
YBR238C	-0.153908	0.999841
YBR239C	0.419197	0.999841
YBR240C	0.140708	0.999841
YBR241C	0.0281705	0.999841
YBR242W	-0.252683	0.999841
YBR243C	-0.260728	0.999841
YBR244W	0.158518	0.999841
YBR245C	0.198585	0.999841
YBR246W	0.0086141	0.999841
YBR247C	-0.0160603	0.999841
YBR248C	-0.0138154	0.999841
YBR249C	-0.103194	0.999841
YBR250W	-1.68093	0.999841
YBR251W	-0.064534	0.999841
YBR252W	-0.2743	0.999841
YBR253W	-0.0569565	0.999841
YBR254C	0.147025	0.999841
YBR255C-A	-0.284655	0.999841
YBR255W	0.52448	0.999841
YBR256C	-0.23133	0.999841
YBR257W	-0.469501	0.999841
YBR258C	0.517865	0.999841
YBR259W	0.163967	0.999841
YBR260C	-0.0600946	0.999841
YBR261C	0.16613	0.999841
YBR262C	-0.034771	0.999841
YBR263W	-0.0431286	0.999841
YBR264C	-0.0324366	0.999841
YBR265W	-0.0226443	0.999841
YBR267W	-0.229454	0.999841
YBR268W	0.290682	0.999841
YBR269C	-0.336598	0.999841
YBR270C	-0.781451	0.999841
YBR271W	0.0223302	0.999841
YBR272C	-0.197478	0.999841
YBR273C	-0.220542	0.999841
YBR274W	-0.191156	0.999841
YBR275C	0.231725	0.999841
YBR276C	-0.426426	0.999841
YBR278W	0.386655	0.999841
YBR279W	0.123999	0.999841
YBR280C	-0.226771	0.999841
YBR281C	-0.0824959	0.999841
YBR282W	-0.0672529	0.999841
YBR283C	-0.248492	0.999841
YBR284W	-0.12865	0.999841
YBR285W	-0.694194	0.999841
YBR286W	-0.119826	0.999841
YBR287W	0.0404195	0.999841
YBR288C	-0.175449	0.999841
YBR289W	0.214347	0.999841
YBR290W	0.413189	0.999841
YBR291C	0.073079	0.999841
YBR293W	0.20222	0.999841
YBR295W	-0.656633	0.999841
YBR297W	-0.48265	0.999841
YBR298C	-0.621639	0.999841
YBR299W	0.110225	0.999841
YCL001W	-0.0871234	0.999841
YCL002C	-0.904481	0.999841
YCL004W	0.0234704	0.999841
YCL005W	-0.0084101	0.999841
YCL005W-A	-0.174843	0.999841
YCL008C	0.155764	0.999841
YCL009C	0.350644	0.999841
YCL010C	0.587869	0.999841
YCL011C	0.120488	0.999841
YCL012C	-0.446037	0.999841
YCL014W	0.0576795	0.999841
YCL016C	-0.00970884	0.999841
YCL017C	-0.0705696	0.999841
YCL021W-A	1.18454	0.999841
YCL024W	0.0486838	0.999841
YCL025C	-0.0445323	0.999841
YCL026C-B	0.160489	0.999841
YCL027W	-0.169737	0.999841
YCL028W	0.0602004	0.999841
YCL029C	-0.028239	0.999841
YCL030C	-0.217621	0.999841
YCL031C	0.0135229	0.999841
YCL032W	0.300353	0.999841
YCL033C	0.272872	0.999841
YCL034W	0.0325854	0.999841
YCL035C	0.0197124	0.999841
YCL036W	0.0682317	0.999841
YCL037C	-0.145609	0.999841
YCL038C	0.172811	0.999841
YCL039W	0.0336133	0.999841
YCL040W	-0.0024036	0.999841
YCL041C	-0.475552	0.999841
YCL043C	-0.0646184	0.999841
YCL044C	-0.15832	0.999841
YCL045C	-0.128283	0.999841
YCL047C	-0.237224	0.999841
YCL049C	0.0897625	0.999841
YCL050C	0.0723675	0.999841
YCL051W	0.0186189	0.999841
YCL052C	-0.134761	0.999841
YCL054W	0.0990916	0.999841
YCL055W	-0.317528	0.999841
YCL056C	-0.877777	0.999841
YCL057C-A	-0.130025	0.999841
YCL057W	-0.203829	0.999841
YCL058W-A	0.0810062	0.999841
YCL059C	0.231153	0.999841
YCL061C	0.234764	0.999841
YCL063W	0.0690526	0.999841
YCL064C	-0.0120698	0.999841
YCR002C	-0.091097	0.999841
YCR003W	-0.296621	0.999841
YCR004C	-0.0698611	0.999841
YCR005C	-0.334701	0.999841
YCR007C	-0.884808	0.999841
YCR008W	-0.261516	0.999841
YCR009C	0.0257945	0.999841
YCR011C	-0.0690095	0.999841
YCR012W	-0.204133	0.999841
YCR014C	3.73837	0.999841
YCR015C	0.192171	0.999841
YCR016W	0.0681302	0.999841
YCR017C	0.0503723	0.999841
YCR019W	-0.122077	0.999841
YCR020C	-1.84068	0.999841
YCR020C-A	-0.2846	0.999841
YCR020W-B	0.454906	0.999841
YCR021C	0.0822902	0.999841
YCR023C	0.00877374	0.999841
YCR024C	0.00126087	0.999841
YCR024C-A	-0.307082	0.999841
YCR024C-B	2.3332	0.999841
YCR025C	-0.0554842	0.999841
YCR026C	0.42385	0.999841
YCR027C	0.151003	0.999841
YCR028C	-0.0413584	0.999841
YCR028C-A	-0.0764105	0.999841
YCR030C	-0.0536333	0.999841
YCR031C	-0.294101	0.999841
YCR032W	0.394981	0.999841
YCR033W	-0.0691846	0.999841
YCR034W	-0.00427012	0.999841
YCR035C	-0.0868362	0.999841
YCR036W	-0.0302605	0.999841
YCR037C	-0.0990972	0.999841
YCR038C	-0.130446	0.999841
YCR042C	0.14922	0.999841
YCR043C	0.0714694	0.999841
YCR044C	-0.0760267	0.999841
YCR045W-A	-0.217346	0.999841
YCR046C	-0.0450309	0.999841
YCR047C	-0.154723	0.999841
YCR048W	0.238913	0.999841
YCR051W	-0.0309722	0.999841
YCR052W	0.104947	0.999841
YCR053W	-0.064421	0.999841
YCR054C	-0.0359754	0.999841
YCR057C	0.114401	0.999841
YCR059C	-0.107915	0.999841
YCR061W	0.0436452	0.999841
YCR063W	0.27141	0.999841
YCR064C	-1.49854	0.999841
YCR065W	-0.114316	0.999841
YCR066W	-0.438687	0.999841
YCR067C	0.160742	0.999841
YCR068W	-0.154529	0.999841
YCR069W	-0.182603	0.999841
YCR071C	0.168963	0.999841
YCR072C	0.0491925	0.999841
YCR073C	0.305027	0.999841
YCR073W-A	0.134582	0.999841
YCR075C	-0.857606	0.999841
YCR075W-A	-0.44997	0.999841
YCR076C	-0.139755	0.999841
YCR077C	0.0672794	0.999841
YCR079W	0.0859582	0.999841
YCR081W	0.0765276	0.999841
YCR082W	-0.39835	0.999841
YCR083W	-0.520285	0.999841
YCR084C	-0.0819118	0.999841
YCR086W	0.165674	0.999841
YCR087C-A	-0.0321344	0.999841
YCR088W	0.126396	0.999841
YCR089W	-0.176251	0.999841
YCR090C	-0.197226	0.999841
YCR091W	0.18015	0.999841
YCR092C	0.159227	0.999841
YCR093W	0.148642	0.999841
YCR094W	-0.0145871	0.999841
YCR095C	-0.591778	0.999841
YCR097W	-0.239632	0.999841
YCR098C	0.198575	0.999841
YCR102C	-0.488345	0.999841
YCR106W	-0.116396	0.999841
YCR107W	-0.105859	0.999841
YDL001W	0.109146	0.999841
YDL002C	0.116427	0.999841
YDL003W	0.192547	0.999841
YDL004W	-0.0865539	0.999841
YDL005C	0.371836	0.999841
YDL006W	0.0704952	0.999841
YDL007W	0.0717804	0.999841
YDL008W	0.300367	0.999841
YDL010W	0.492184	0.999841
YDL012C	0.0141657	0.999841
YDL013W	-0.134961	0.999841
YDL014W	0.0976454	0.999841
YDL015C	-0.246225	0.999841
YDL017W	-0.047809	0.999841
YDL018C	-0.242716	0.999841
YDL019C	-0.173096	0.999841
YDL020C	-0.370894	0.999841
YDL021W	0.708917	0.999841
YDL022W	-0.0261349	0.999841
YDL024C	0.849058	0.999841
YDL025C	-0.138704	0.999841
YDL027C	0.110952	0.999841
YDL028C	-0.0639928	0.999841
YDL029W	0.0170903	0.999841
YDL030W	0.039506	0.999841
YDL031W	0.030923	0.999841
YDL033C	0.166651	0.999841
YDL035C	0.196012	0.999841
YDL036C	-0.0102125	0.999841
YDL039C	-2.33842	0.999841
YDL040C	0.101156	0.999841
YDL042C	0.0902577	0.999841
YDL043C	-0.0585817	0.999841
YDL044C	0.154316	0.999841
YDL045C	-0.0424274	0.999841
YDL045W-A	-0.30325	0.999841
YDL046W	-0.11741	0.999841
YDL048C	0.102219	0.999841
YDL049C	0.165607	0.999841
YDL051W	-0.106073	0.999841
YDL052C	-0.215611	0.999841
YDL053C	-0.131636	0.999841
YDL054C	-0.350634	0.999841
YDL055C	-0.0353493	0.999841
YDL056W	0.0981528	0.999841
YDL057W	-0.440959	0.999841
YDL058W	0.177685	0.999841
YDL059C	0.237466	0.999841
YDL060W	0.0934271	0.999841
YDL061C	0.0292055	0.999841
YDL063C	0.110912	0.999841
YDL064W	0.279236	0.999841
YDL065C	0.299563	0.999841
YDL066W	-0.1028	0.999841
YDL067C	-0.286041	0.999841
YDL069C	-0.38445	0.999841
YDL070W	-0.010809	0.999841
YDL072C	-0.127269	0.999841
YDL073W	0.0247055	0.999841
YDL074C	0.146741	0.999841
YDL075W	0.0310457	0.999841
YDL076C	0.136984	0.999841
YDL077C	0.529727	0.999841
YDL078C	-0.049385	0.999841
YDL079C	0.899724	0.999841
YDL080C	0.364896	0.999841
YDL081C	-0.250327	0.999841
YDL082W	-0.0981092	0.999841
YDL083C	-0.225353	0.999841
YDL084W	-0.132002	0.999841
YDL085C-A	-0.241782	0.999841
YDL085W	1.5194	0.999841
YDL086C-A	0.148247	0.999841
YDL086W	-0.0979363	0.999841
YDL087C	0.450756	0.999841
YDL088C	-0.0443386	0.999841
YDL089W	0.33063	0.999841
YDL090C	-0.0613082	0.999841
YDL091C	-0.0860194	0.999841
YDL092W	-0.0525046	0.999841
YDL093W	0.0144051	0.999841
YDL095W	0.0504473	0.999841
YDL097C	0.105878	0.999841
YDL098C	-0.520248	0.999841
YDL099W	-0.141967	0.999841
YDL100C	0.112435	0.999841
YDL101C	-0.124904	0.999841
YDL102W	0.0034387	0.999841
YDL103C	0.166974	0.999841
YDL104C	0.448157	0.999841
YDL105W	0.166326	0.999841
YDL106C	0.445036	0.999841
YDL107W	0.103698	0.999841
YDL108W	-0.0429918	0.999841
YDL109C	-0.407949	0.999841
YDL110C	-0.191329	0.999841
YDL111C	0.0589564	0.999841
YDL112W	0.102823	0.999841
YDL113C	-0.110131	0.999841
YDL115C	-0.493719	0.999841
YDL116W	0.0593672	0.999841
YDL117W	-0.232287	0.999841
YDL119C	-0.552699	0.999841
YDL120W	0.0561416	0.999841
YDL121C	0.34576	0.999841
YDL122W	0.16279	0.999841
YDL123W	0.199914	0.999841
YDL124W	0.100082	0.999841
YDL125C	-0.0378	0.999841
YDL126C	0.0817633	0.999841
YDL127W	-0.0300327	0.999841
YDL128W	-0.168277	0.999841
YDL129W	0.676257	0.999841
YDL130W	-0.127638	0.999841
YDL130W-A	0.443097	0.999841
YDL131W	0.0769334	0.999841
YDL132W	0.19721	0.999841
YDL133C-A	0.393879	0.999841
YDL133W	0.182435	0.999841
YDL134C	-0.201741	0.999841
YDL135C	0.0932325	0.999841
YDL136W	0.120008	0.999841
YDL137W	-0.184934	0.999841
YDL138W	-0.0411785	0.999841
YDL139C	-0.315063	0.999841
YDL140C	-0.13769	0.999841
YDL141W	0.116967	0.999841
YDL142C	-0.562968	0.999841
YDL143W	-0.0368773	0.999841
YDL144C	0.00721589	0.999841
YDL145C	-0.201472	0.999841
YDL146W	0.0296906	0.999841
YDL147W	0.200161	0.999841
YDL148C	0.18099	0.999841
YDL149W	0.0942456	0.999841
YDL150W	0.0409206	0.999841
YDL153C	0.166207	0.999841
YDL154W	-0.616086	0.999841
YDL155W	0.302035	0.999841
YDL156W	-0.282467	0.999841
YDL157C	-0.271644	0.999841
YDL159W	-0.0183803	0.999841
YDL160C	-0.148598	0.999841
YDL160C-A	-0.00877103	0.999841
YDL161W	0.337184	0.999841
YDL164C	0.110097	0.999841
YDL165W	-0.0867692	0.999841
YDL166C	0.24934	0.999841
YDL167C	0.224762	0.999841
YDL168W	-0.0509063	0.999841
YDL169C	0.0416173	0.999841
YDL170W	-0.281276	0.999841
YDL171C	0.0403495	0.999841
YDL173W	0.19222	0.999841
YDL174C	0.0358928	0.999841
YDL175C	0.316439	0.999841
YDL176W	0.393135	0.999841
YDL177C	-0.524453	0.999841
YDL178W	0.270378	0.999841
YDL179W	-0.473841	0.999841
YDL180W	-0.0953302	0.999841
YDL181W	-0.552935	0.999841
YDL182W	0.010728	0.999841
YDL183C	0.29832	0.999841
YDL184C	0.346968	0.999841
YDL185W	-0.0141068	0.999841
YDL187C	-0.402988	0.999841
YDL188C	-0.333801	0.999841
YDL189W	-0.104568	0.999841
YDL190C	-0.116401	0.999841
YDL191W	0.111462	0.999841
YDL192W	-0.0191559	0.999841
YDL193W	-0.103561	0.999841
YDL194W	-0.143046	0.999841
YDL195W	-0.0355842	0.999841
YDL197C	-0.0655106	0.999841
YDL198C	-0.326485	0.999841
YDL199C	0.0727668	0.999841
YDL200C	0.543573	0.999841
YDL201W	0.0883478	0.999841
YDL202W	0.318112	0.999841
YDL203C	0.0876973	0.999841
YDL204W	0.00865279	0.999841
YDL205C	0.0836954	0.999841
YDL206W	0.192603	0.999841
YDL207W	-0.187722	0.999841
YDL208W	-0.00478597	0.999841
YDL209C	-0.121958	0.999841
YDL210W	-2.82281	0.999841
YDL211C	-0.0500318	0.999841
YDL212W	-0.0892762	0.999841
YDL213C	0.027646	0.999841
YDL214C	0.507934	0.999841
YDL215C	-0.0815702	0.999841
YDL216C	-0.208735	0.999841
YDL217C	-0.167864	0.999841
YDL218W	1.04508	0.999841
YDL219W	0.180278	0.999841
YDL220C	0.353539	0.999841
YDL222C	0.453754	0.999841
YDL224C	-0.3077	0.999841
YDL225W	0.0237891	0.999841
YDL226C	-0.0552378	0.999841
YDL227C	-0.0115299	0.999841
YDL229W	-0.0364724	0.999841
YDL230W	-0.205636	0.999841
YDL231C	-0.296034	0.999841
YDL232W	-0.198528	0.999841
YDL233W	-0.10586	0.999841
YDL234C	0.0421011	0.999841
YDL235C	-0.231164	0.999841
YDL236W	-0.0192253	0.999841
YDL237W	-0.0824546	0.999841
YDL238C	-0.0668658	0.999841
YDL239C	-0.281593	0.999841
YDL240W	-0.0902363	0.999841
YDL241W	-0.183486	0.999841
YDL243C	-0.609065	0.999841
YDL244W	-0.0311428	0.999841
YDL248W	-0.228207	0.999841
YDR001C	-0.0560544	0.999841
YDR002W	0.0901122	0.999841
YDR003W-A	0.327234	0.999841
YDR004W	0.513008	0.999841
YDR005C	-0.0881283	0.999841
YDR006C	-0.0474083	0.999841
YDR007W	-0.234707	0.999841
YDR009W	1.49792	0.999841
YDR011W	-0.105122	0.999841
YDR012W	-0.253236	0.999841
YDR013W	0.47363	0.999841
YDR014W	0.496465	0.999841
YDR016C	-0.448047	0.999841
YDR017C	0.346228	0.999841
YDR018C	0.00888808	0.999841
YDR019C	0.0664326	0.999841
YDR020C	0.39235	0.999841
YDR021W	0.24996	0.999841
YDR022C	0.0606757	0.999841
YDR023W	0.0386777	0.999841
YDR025W	-0.124323	0.999841
YDR026C	-0.246895	0.999841
YDR027C	-0.125374	0.999841
YDR028C	-0.0804056	0.999841
YDR030C	0.75474	0.999841
YDR031W	0.176851	0.999841
YDR032C	-0.126252	0.999841
YDR033W	-0.239945	0.999841
YDR034C	-0.194125	0.999841
YDR035W	0.00183695	0.999841
YDR036C	-0.185275	0.999841
YDR037W	0.0422644	0.999841
YDR038C	-0.0247544	0.999841
YDR041W	-0.157663	0.999841
YDR042C	-0.574274	0.999841
YDR044W	-0.158335	0.999841
YDR045C	-0.365374	0.999841
YDR046C	-0.161484	0.999841
YDR047W	-0.287443	0.999841
YDR049W	0.0697174	0.999841
YDR050C	-0.138748	0.999841
YDR051C	0.124362	0.999841
YDR052C	0.230667	0.999841
YDR054C	-0.115726	0.999841
YDR055W	-0.0209737	0.999841
YDR056C	0.354837	0.999841
YDR057W	0.437727	0.999841
YDR058C	0.141278	0.999841
YDR059C	0.31981	0.999841
YDR060W	0.127481	0.999841
YDR061W	-0.125841	0.999841
YDR062W	-0.1054	0.999841
YDR063W	0.127162	0.999841
YDR064W	-0.139189	0.999841
YDR065W	-0.521797	0.999841
YDR066C	-0.441652	0.999841
YDR067C	-0.423742	0.999841
YDR068W	-0.174958	0.999841
YDR069C	-0.122352	0.999841
YDR070C	-0.436662	0.999841
YDR071C	-0.00524649	0.999841
YDR072C	0.122454	0.999841
YDR073W	-0.0105646	0.999841
YDR074W	0.280067	0.999841
YDR075W	0.230979	0.999841
YDR076W	0.590849	0.999841
YDR077W	0.0877616	0.999841
YDR078C	-0.880082	0.999841
YDR079C-A	0.164313	0.999841
YDR079W	-0.0321396	0.999841
YDR080W	0.219932	0.999841
YDR081C	0.0149519	0.999841
YDR082W	-0.220032	0.999841
YDR083W	0.150082	0.999841
YDR084C	-0.203713	0.999841
YDR085C	0.623787	0.999841
YDR086C	-0.00609857	0.999841
YDR087C	0.0533009	0.999841
YDR088C	0.112508	0.999841
YDR089W	0.0982358	0.999841
YDR090C	-0.277421	0.999841
YDR091C	0.000117064	0.999841
YDR092W	-0.148754	0.999841
YDR093W	-0.0431909	0.999841
YDR096W	-0.106174	0.999841
YDR097C	0.143847	0.999841
YDR098C	-0.123686	0.999841
YDR099W	0.090433	0.999841
YDR100W	0.0332955	0.999841
YDR101C	0.0639511	0.999841
YDR103W	0.0781484	0.999841
YDR104C	0.275278	0.999841
YDR105C	-0.120036	0.999841
YDR106W	1.26314	0.999841
YDR107C	-0.0926728	0.999841
YDR108W	-0.0629712	0.999841
YDR109C	-0.136491	0.999841
YDR110W	0.169455	0.999841
YDR111C	-0.224981	0.999841
YDR113C	0.0294184	0.999841
YDR115W	-0.22537	0.999841
YDR116C	-0.29716	0.999841
YDR117C	0.0965537	0.999841
YDR118W	0.20951	0.999841
YDR119W	-0.0527658	0.999841
YDR120C	0.00303867	0.999841
YDR121W	-0.262232	0.999841
YDR122W	0.0918809	0.999841
YDR123C	0.379552	0.999841
YDR124W	0.131016	0.999841
YDR125C	-0.0656748	0.999841
YDR126W	-0.469619	0.999841
YDR127W	-0.000798907	0.999841
YDR128W	0.111109	0.999841
YDR129C	0.0457819	0.999841
YDR130C	0.218028	0.999841
YDR131C	-0.574324	0.999841
YDR132C	0.61567	0.999841
YDR133C	-0.0261065	0.999841
YDR135C	0.127497	0.999841
YDR137W	0.218047	0.999841
YDR138W	0.368037	0.999841
YDR139C	0.093563	0.999841
YDR140W	0.188812	0.999841
YDR141C	0.121172	0.999841
YDR142C	-0.0244097	0.999841
YDR143C	0.271651	0.999841
YDR144C	-0.0443129	0.999841
YDR145W	-0.1234	0.999841
YDR146C	0.0648778	0.999841
YDR147W	0.029992	0.999841
YDR148C	0.0452496	0.999841
YDR150W	0.24874	0.999841
YDR151C	0.0463832	0.999841
YDR152W	0.114035	0.999841
YDR153C	0.0992926	0.999841
YDR158W	-0.17663	0.999841
YDR159W	-0.0870585	0.999841
YDR160W	-0.512932	0.999841
YDR161W	0.150304	0.999841
YDR162C	0.440933	0.999841
YDR163W	0.438183	0.999841
YDR164C	0.117324	0.999841
YDR165W	-0.0173955	0.999841
YDR166C	0.171499	0.999841
YDR167W	0.0913818	0.999841
YDR168W	0.0829269	0.999841
YDR169C	0.211185	0.999841
YDR170C	-0.0531584	0.999841
YDR171W	0.184278	0.999841
YDR172W	0.0561766	0.999841
YDR173C	0.604161	0.999841
YDR174W	-0.0426699	0.999841
YDR175C	0.161089	0.999841
YDR176W	0.151984	0.999841
YDR177W	-0.0312527	0.999841
YDR178W	-0.358794	0.999841
YDR179C	-0.712969	0.999841
YDR179W-A	0.215333	0.999841
YDR180W	-0.075466	0.999841
YDR181C	0.137876	0.999841
YDR182W	-0.0628565	0.999841
YDR183W	0.12977	0.999841
YDR185C	0.421546	0.999841
YDR186C	0.0621192	0.999841
YDR188W	-0.148051	0.999841
YDR189W	0.0775986	0.999841
YDR190C	0.153098	0.999841
YDR191W	-0.140125	0.999841
YDR192C	-0.529489	0.999841
YDR194C	-0.0788063	0.999841
YDR195W	0.306446	0.999841
YDR196C	0.241253	0.999841
YDR197W	-0.108687	0.999841
YDR198C	0.0398703	0.999841
YDR200C	-0.0122838	0.999841
YDR201W	-0.0450416	0.999841
YDR202C	0.0337995	0.999841
YDR204W	-0.255678	0.999841
YDR205W	-0.12798	0.999841
YDR206W	-0.257223	0.999841
YDR207C	-0.172591	0.999841
YDR208W	0.00042798	0.999841
YDR210W	-0.182303	0.999841
YDR211W	0.221484	0.999841
YDR212W	-0.0108881	0.999841
YDR213W	-0.208435	0.999841
YDR214W	0.0260676	0.999841
YDR216W	-0.129966	0.999841
YDR217C	0.149694	0.999841
YDR219C	0.0436925	0.999841
YDR221W	0.148502	0.999841
YDR222W	0.0446783	0.999841
YDR223W	1.80867	0.999841
YDR224C	-0.0807009	0.999841
YDR225W	-0.173571	0.999841
YDR226W	0.0234274	0.999841
YDR227W	-0.252721	0.999841
YDR228C	-0.11216	0.999841
YDR229W	0.211798	0.999841
YDR231C	-0.103259	0.999841
YDR232W	-0.148701	0.999841
YDR233C	-0.176418	0.999841
YDR234W	-0.0343446	0.999841
YDR235W	-0.113605	0.999841
YDR236C	-0.229503	0.999841
YDR237W	-0.204266	0.999841
YDR238C	0.107203	0.999841
YDR239C	-0.171519	0.999841
YDR240C	0.00206908	0.999841
YDR241W	-1.92343	0.999841
YDR242W	0.632491	0.999841
YDR243C	-0.208346	0.999841
YDR244W	0.0513767	0.999841
YDR245W	-0.0409912	0.999841
YDR246W	0.536262	0.999841
YDR247W	0.0607406	0.999841
YDR248C	-0.0227858	0.999841
YDR249C	-0.795105	0.999841
YDR251W	-0.0285889	0.999841
YDR252W	-0.25374	0.999841
YDR253C	0.967448	0.999841
YDR254W	-0.328118	0.999841
YDR255C	0.579941	0.999841
YDR256C	-0.132219	0.999841
YDR257C	0.17208	0.999841
YDR258C	0.179944	0.999841
YDR259C	0.677132	0.999841
YDR260C	-0.0593912	0.999841
YDR261C	-0.118919	0.999841
YDR262W	0.181459	0.999841
YDR263C	1.28913	0.999841
YDR264C	-0.0212619	0.999841
YDR265W	-0.0795796	0.999841
YDR266C	0.0270793	0.999841
YDR267C	0.297052	0.999841
YDR268W	0.238754	0.999841
YDR270W	0.137838	0.999841
YDR272W	0.100019	0.999841
YDR273W	0.151296	0.999841
YDR275W	-1.00768	0.999841
YDR276C	-0.288825	0.999841
YDR277C	-0.26194	0.999841
YDR279W	-0.126686	0.999841
YDR280W	-0.0359453	0.999841
YDR282C	0.72558	0.999841
YDR283C	0.0286953	0.999841
YDR284C	-0.218572	0.999841
YDR285W	-0.719671	0.999841
YDR286C	0.12755	0.999841
YDR287W	0.145564	0.999841
YDR288W	0.00907115	0.999841
YDR289C	0.20873	0.999841
YDR291W	-0.400297	0.999841
YDR292C	-0.0836333	0.999841
YDR293C	0.105335	0.999841
YDR294C	0.0750972	0.999841
YDR295C	-0.0688551	0.999841
YDR296W	0.0475913	0.999841
YDR297W	-0.0882939	0.999841
YDR298C	-0.26028	0.999841
YDR299W	0.188978	0.999841
YDR300C	-0.20058	0.999841
YDR301W	-0.083813	0.999841
YDR302W	0.0179915	0.999841
YDR303C	-0.174957	0.999841
YDR304C	-0.0930006	0.999841
YDR305C	-0.0588864	0.999841
YDR306C	0.00597163	0.999841
YDR307W	0.0536633	0.999841
YDR308C	-0.0288759	0.999841
YDR309C	-0.03456	0.999841
YDR310C	-0.0592282	0.999841
YDR311W	0.113611	0.999841
YDR312W	0.37062	0.999841
YDR313C	-0.111004	0.999841
YDR314C	-0.129924	0.999841
YDR315C	0.365906	0.999841
YDR316W	-0.237902	0.999841
YDR317W	-0.768833	0.999841
YDR318W	0.10859	0.999841
YDR319C	-0.170029	0.999841
YDR320C	0.00933227	0.999841
YDR320C-A	-0.127697	0.999841
YDR321W	-0.0166619	0.999841
YDR322C-A	0.00674173	0.999841
YDR322W	0.198355	0.999841
YDR323C	0.464204	0.999841
YDR324C	0.124771	0.999841
YDR325W	0.0382961	0.999841
YDR326C	0.0144055	0.999841
YDR328C	-0.11473	0.999841
YDR329C	0.0217993	0.999841
YDR330W	0.129133	0.999841
YDR331W	0.148497	0.999841
YDR332W	-1.09204	0.999841
YDR333C	0.0823816	0.999841
YDR334W	0.313512	0.999841
YDR335W	-0.00324879	0.999841
YDR336W	-0.339987	0.999841
YDR337W	-0.131947	0.999841
YDR338C	-0.152569	0.999841
YDR339C	0.0269321	0.999841
YDR341C	0.0213562	0.999841
YDR342C	-0.0327531	0.999841
YDR343C	-0.0279121	0.999841
YDR345C	0.0898312	0.999841
YDR346C	-0.0452744	0.999841
YDR347W	-0.0454742	0.999841
YDR348C	0.122099	0.999841
YDR349C	-0.142116	0.999841
YDR350C	-0.278254	0.999841
YDR351W	0.0477957	0.999841
YDR352W	-0.176661	0.999841
YDR353W	-0.0717491	0.999841
YDR354W	-0.35668	0.999841
YDR356W	0.235072	0.999841
YDR357C	0.0250783	0.999841
YDR358W	-0.0673551	0.999841
YDR359C	0.149057	0.999841
YDR361C	0.0630238	0.999841
YDR362C	-0.214484	0.999841
YDR363W	-0.397178	0.999841
YDR363W-A	0.0331641	0.999841
YDR364C	-0.161776	0.999841
YDR365C	0.0586179	0.999841
YDR366C	1.12153	0.999841
YDR367W	-0.114096	0.999841
YDR368W	-0.0346817	0.999841
YDR369C	-0.0524548	0.999841
YDR370C	0.114082	0.999841
YDR371W	0.136898	0.999841
YDR372C	-0.138589	0.999841
YDR374W-A	-0.313405	0.999841
YDR375C	-0.420759	0.999841
YDR376W	0.199536	0.999841
YDR377W	-0.193255	0.999841
YDR378C	-0.440006	0.999841
YDR379C-A	-0.31039	0.999841
YDR379W	0.0560729	0.999841
YDR380W	-1.13951	0.999841
YDR381C-A	-0.425813	0.999841
YDR381W	-0.220644	0.999841
YDR382W	-0.0560859	0.999841
YDR383C	-0.112647	0.999841
YDR384C	0.232304	0.999841
YDR385W	-0.0882024	0.999841
YDR386W	0.42499	0.999841
YDR387C	-0.590226	0.999841
YDR388W	0.263323	0.999841
YDR389W	-0.0173225	0.999841
YDR390C	-0.0861765	0.999841
YDR391C	0.218097	0.999841
YDR392W	0.443929	0.999841
YDR393W	-0.079849	0.999841
YDR394W	-0.171398	0.999841
YDR395W	0.0323656	0.999841
YDR397C	-0.340163	0.999841
YDR398W	0.186758	0.999841
YDR399W	0.0414848	0.999841
YDR402C	-0.779833	0.999841
YDR403W	-0.744373	0.999841
YDR404C	-0.023447	0.999841
YDR405W	0.0376848	0.999841
YDR406W	-0.564586	0.999841
YDR407C	0.19993	0.999841
YDR408C	-0.333385	0.999841
YDR409W	0.181952	0.999841
YDR410C	-0.197903	0.999841
YDR411C	-0.140348	0.999841
YDR412W	0.248001	0.999841
YDR414C	-0.155817	0.999841
YDR415C	0.220633	0.999841
YDR416W	0.235583	0.999841
YDR418W	-0.148152	0.999841
YDR419W	-0.361723	0.999841
YDR420W	0.0536341	0.999841
YDR421W	-0.268918	0.999841
YDR422C	0.00627961	0.999841
YDR423C	0.357739	0.999841
YDR424C	-0.193184	0.999841
YDR425W	0.354438	0.999841
YDR427W	0.164233	0.999841
YDR428C	0.236399	0.999841
YDR429C	0.0136232	0.999841
YDR430C	0.28229	0.999841
YDR434W	-0.191326	0.999841
YDR435C	-0.319529	0.999841
YDR436W	-0.0902231	0.999841
YDR438W	0.0322085	0.999841
YDR439W	0.30134	0.999841
YDR440W	-0.0526089	0.999841
YDR441C	-0.698429	0.999841
YDR443C	0.0600639	0.999841
YDR444W	0.0950444	0.999841
YDR445C	1.42219	0.999841
YDR447C	-0.0174639	0.999841
YDR448W	-0.208169	0.999841
YDR449C	0.280959	0.999841
YDR450W	-0.0788312	0.999841
YDR451C	-0.285239	0.999841
YDR452W	-0.0720133	0.999841
YDR453C	0.0292018	0.999841
YDR454C	-0.00160477	0.999841
YDR456W	-0.212736	0.999841
YDR457W	0.16797	0.999841
YDR458C	0.0176985	0.999841
YDR459C	-0.183186	0.999841
YDR460W	-0.169779	0.999841
YDR461C-A	-0.0170291	0.999841
YDR461W	0.0768681	0.999841
YDR462W	-0.279808	0.999841
YDR463W	0.227966	0.999841
YDR464W	0.289022	0.999841
YDR465C	0.210004	0.999841
YDR466W	0.248697	0.999841
YDR468C	0.276795	0.999841
YDR469W	0.21428	0.999841
YDR470C	0.150413	0.999841
YDR471W	0.0281436	0.999841
YDR472W	-0.0518696	0.999841
YDR473C	0.421084	0.999841
YDR475C	0.0527471	0.999841
YDR476C	-0.0618172	0.999841
YDR477W	0.0725692	0.999841
YDR478W	0.00535609	0.999841
YDR479C	-0.405877	0.999841
YDR481C	0.0335403	0.999841
YDR482C	0.244246	0.999841
YDR483W	-0.290097	0.999841
YDR484W	0.0384636	0.999841
YDR485C	0.184905	0.999841
YDR486C	0.214614	0.999841
YDR487C	-0.0201857	0.999841
YDR488C	-0.375406	0.999841
YDR489W	-0.450084	0.999841
YDR490C	-0.108366	0.999841
YDR492W	-0.256757	0.999841
YDR493W	0.180574	0.999841
YDR494W	-0.232995	0.999841
YDR495C	0.266281	0.999841
YDR496C	0.130953	0.999841
YDR497C	-0.227247	0.999841
YDR498C	0.392588	0.999841
YDR499W	0.0867667	0.999841
YDR500C	-0.191293	0.999841
YDR501W	0.0339549	0.999841
YDR502C	0.0212052	0.999841
YDR503C	0.042269	0.999841
YDR504C	-1.74244	0.999841
YDR505C	-0.0856716	0.999841
YDR506C	0.154302	0.999841
YDR507C	-0.22992	0.999841
YDR508C	-0.0122242	0.999841
YDR510W	0.0608862	0.999841
YDR511W	-0.330785	0.999841
YDR512C	-0.209172	0.999841
YDR513W	-0.107614	0.999841
YDR514C	0.1838	0.999841
YDR515W	-0.247159	0.999841
YDR516C	-0.0237647	0.999841
YDR517W	-0.146072	0.999841
YDR518W	-0.171205	0.999841
YDR519W	-0.134573	0.999841
YDR520C	-0.547566	0.999841
YDR523C	0.907684	0.999841
YDR524C	0.0934635	0.999841
YDR524C-B	-0.331312	0.999841
YDR525W-A	-0.099563	0.999841
YDR527W	-0.233992	0.999841
YDR528W	0.182089	0.999841
YDR529C	-0.0768677	0.999841
YDR530C	-0.201131	0.999841
YDR531W	0.23095	0.999841
YDR532C	-0.112344	0.999841
YDR533C	-0.113913	0.999841
YDR534C	-4.60997	0.999841
YDR535C	-2.20342	0.999841
YDR538W	-0.374991	0.999841
YDR539W	0.0573608	0.999841
YDR540C	0.559327	0.999841
YDR541C	-1.14322	0.999841
YEL001C	-0.0557945	0.999841
YEL002C	-0.017552	0.999841
YEL003W	0.222235	0.999841
YEL004W	-0.0771445	0.999841
YEL005C	-0.790742	0.999841
YEL006W	0.223986	0.999841
YEL007W	-0.114663	0.999841
YEL009C	-0.330927	0.999841
YEL011W	0.0484659	0.999841
YEL012W	-0.273373	0.999841
YEL013W	-0.0874856	0.999841
YEL015W	0.263494	0.999841
YEL016C	-0.237118	0.999841
YEL017C-A	0.052835	0.999841
YEL017W	-0.192334	0.999841
YEL018W	-0.162359	0.999841
YEL020W-A	0.0471994	0.999841
YEL022W	0.0819043	0.999841
YEL023C	-0.374866	0.999841
YEL024W	-0.209631	0.999841
YEL025C	0.122382	0.999841
YEL026W	-0.197076	0.999841
YEL027W	-0.10904	0.999841
YEL028W	-1.19327	0.999841
YEL029C	-0.208288	0.999841
YEL030W	-0.478039	0.999841
YEL031W	0.0373707	0.999841
YEL032W	-0.00867193	0.999841
YEL033W	2.2926	0.999841
YEL034W	-0.0203073	0.999841
YEL036C	0.260672	0.999841
YEL037C	0.00324463	0.999841
YEL038W	-0.534716	0.999841
YEL039C	0.207556	0.999841
YEL040W	0.13622	0.999841
YEL041W	-0.139704	0.999841
YEL042W	-0.15525	0.999841
YEL043W	0.358791	0.999841
YEL044W	-0.459162	0.999841
YEL046C	-0.0369237	0.999841
YEL047C	-0.0692395	0.999841
YEL048C	0.206814	0.999841
YEL049W	1.6412	0.999841
YEL050C	-0.187736	0.999841
YEL051W	0.0205662	0.999841
YEL052W	0.139871	0.999841
YEL053C	-0.0754844	0.999841
YEL054C	-0.179377	0.999841
YEL055C	-0.0618509	0.999841
YEL056W	-0.0692609	0.999841
YEL057C	-1.709	0.999841
YEL058W	-0.00283048	0.999841
YEL059C-A	0.00250537	0.999841
YEL060C	0.193055	0.999841
YEL061C	0.0927629	0.999841
YEL062W	-0.102682	0.999841
YEL063C	-0.153362	0.999841
YEL064C	0.611346	0.999841
YEL065W	-0.471067	0.999841
YEL066W	-0.102312	0.999841
YEL068C	-0.615377	0.999841
YEL070W	-0.075452	0.999841
YEL071W	-0.0982215	0.999841
YEL072W	-0.0397957	0.999841
YEL073C	-0.488665	0.999841
YER001W	0.0592932	0.999841
YER002W	0.190627	0.999841
YER003C	-0.0208049	0.999841
YER004W	-0.0508527	0.999841
YER005W	-0.030142	0.999841
YER006W	0.100565	0.999841
YER007C-A	0.200742	0.999841
YER007W	-0.515977	0.999841
YER008C	0.233618	0.999841
YER009W	0.0426337	0.999841
YER010C	-0.548837	0.999841
YER011W	0.251516	0.999841
YER012W	-0.000877158	0.999841
YER013W	0.104067	0.999841
YER014W	0.120935	0.999841
YER015W	-0.466756	0.999841
YER016W	0.103417	0.999841
YER017C	0.2555	0.999841
YER018C	-0.211997	0.999841
YER019C-A	-0.118686	0.999841
YER019W	-0.165475	0.999841
YER020W	0.190179	0.999841
YER021W	0.0995596	0.999841
YER022W	0.365998	0.999841
YER023W	-0.0339765	0.999841
YER024W	-0.44641	0.999841
YER025W	0.0655294	0.999841
YER026C	-0.0858244	0.999841
YER027C	0.0856323	0.999841
YER028C	-0.271966	0.999841
YER029C	0.255008	0.999841
YER030W	0.432944	0.999841
YER031C	-0.0430846	0.999841
YER032W	0.237531	0.999841
YER033C	-0.0819182	0.999841
YER034W	-0.012139	0.999841
YER035W	0.106162	0.999841
YER036C	-0.0757705	0.999841
YER037W	0.281294	0.999841
YER038C	-0.0914892	0.999841
YER039C	-0.643153	0.999841
YER040W	-0.0547901	0.999841
YER041W	0.0463863	0.999841
YER042W	-0.0811297	0.999841
YER043C	-0.0420976	0.999841
YER044C	0.144414	0.999841
YER044C-A	-2.96457	0.999841
YER045C	-0.286237	0.999841
YER046W	-0.827392	0.999841
YER047C	0.123948	0.999841
YER048C	0.0661992	0.999841
YER048W-A	-0.0460079	0.999841
YER049W	-0.0423659	0.999841
YER050C	0.0778749	0.999841
YER051W	0.257029	0.999841
YER052C	-0.316366	0.999841
YER053C	-0.0499096	0.999841
YER053C-A	0.382736	0.999841
YER054C	-0.0362236	0.999841
YER055C	-0.0664575	0.999841
YER056C	-0.153011	0.999841
YER056C-A	-0.0778948	0.999841
YER057C	-0.197925	0.999841
YER058W	-0.607602	0.999841
YER059W	-0.0849601	0.999841
YER060W	-0.278889	0.999841
YER060W-A	-0.647952	0.999841
YER061C	0.527087	0.999841
YER062C	0.0619752	0.999841
YER063W	0.108919	0.999841
YER064C	0.00553765	0.999841
YER065C	-0.307124	0.999841
YER066W	0.594	0.999841
YER067W	-0.0904137	0.999841
YER068W	0.0394024	0.999841
YER069W	-0.514352	0.999841
YER070W	0.137177	0.999841
YER071C	0.267998	0.999841
YER072W	-0.126687	0.999841
YER073W	-0.169439	0.999841
YER074W	-0.135674	0.999841
YER074W-A	0.0392738	0.999841
YER075C	-0.101934	0.999841
YER076C	-0.514122	0.999841
YER077C	0.175585	0.999841
YER078C	0.126906	0.999841
YER079W	-0.0816901	0.999841
YER080W	0.174787	0.999841
YER081W	-0.401639	0.999841
YER082C	0.106319	0.999841
YER083C	-0.14725	0.999841
YER086W	-0.0589755	0.999841
YER087C-B	-0.390694	0.999841
YER087W	-0.0442482	0.999841
YER088C	-0.022557	0.999841
YER088C-A	0.966157	0.999841
YER089C	-0.127528	0.999841
YER090W	0.00333697	0.999841
YER091C	-0.0840924	0.999841
YER092W	-0.0418322	0.999841
YER093C	0.2767	0.999841
YER093C-A	-0.153435	0.999841
YER094C	0.0276365	0.999841
YER095W	-0.251521	0.999841
YER096W	-0.927687	0.999841
YER098W	-0.183255	0.999841
YER099C	0.176593	0.999841
YER100W	0.119403	0.999841
YER101C	0.417731	0.999841
YER102W	-0.137038	0.999841
YER103W	-0.232198	0.999841
YER104W	-0.00500852	0.999841
YER105C	0.153879	0.999841
YER107C	-0.266301	0.999841
YER109C	-0.61631	0.999841
YER110C	-0.073661	0.999841
YER111C	-0.0170674	0.999841
YER112W	0.180168	0.999841
YER113C	-0.154524	0.999841
YER114C	-0.112362	0.999841
YER115C	-0.527026	0.999841
YER116C	0.0293831	0.999841
YER117W	-0.189842	0.999841
YER118C	-0.0553039	0.999841
YER119C	0.171269	0.999841
YER120W	-0.0871362	0.999841
YER121W	0.109629	0.999841
YER122C	-0.132497	0.999841
YER123W	0.103547	0.999841
YER124C	0.0943547	0.999841
YER125W	-0.227542	0.999841
YER126C	0.0824017	0.999841
YER127W	0.301115	0.999841
YER128W	-0.219973	0.999841
YER129W	0.0686397	0.999841
YER130C	0.00463802	0.999841
YER131W	0.0606557	0.999841
YER132C	-0.191104	0.999841
YER133W	0.00538688	0.999841
YER134C	0.0689003	0.999841
YER136W	-0.00661453	0.999841
YER137C	0.956261	0.999841
YER138W-A	1.5207	0.999841
YER139C	-0.0757593	0.999841
YER140W	-0.165451	0.999841
YER141W	0.0104886	0.999841
YER142C	0.202155	0.999841
YER143W	0.340372	0.999841
YER144C	0.0102148	0.999841
YER145C	0.00310501	0.999841
YER146W	-0.270632	0.999841
YER147C	-0.360167	0.999841
YER148W	-0.137981	0.999841
YER149C	-0.0665708	0.999841
YER150W	0.0696809	0.999841
YER151C	0.0982615	0.999841
YER152C	0.416838	0.999841
YER154W	0.150684	0.999841
YER155C	0.17893	0.999841
YER156C	-0.0710142	0.999841
YER157W	0.260367	0.999841
YER158C	-0.486057	0.999841
YER159C	-0.0959739	0.999841
YER161C	0.497406	0.999841
YER162C	0.317412	0.999841
YER163C	-0.153327	0.999841
YER164W	0.0589649	0.999841
YER165W	-0.0101542	0.999841
YER166W	-0.0222694	0.999841
YER167W	-0.0623962	0.999841
YER168C	0.138453	0.999841
YER169W	-0.31189	0.999841
YER170W	0.0231801	0.999841
YER171W	0.0950821	0.999841
YER172C	0.135331	0.999841
YER173W	0.228766	0.999841
YER174C	-0.0255034	0.999841
YER175C	-0.976451	0.999841
YER176W	-0.026956	0.999841
YER177W	-0.00907118	0.999841
YER178W	-0.174115	0.999841
YER179W	1.92695	0.999841
YER180C	0.204878	0.999841
YER180C-A	1.13933	0.999841
YER182W	0.174744	0.999841
YER183C	0.536192	0.999841
YER184C	-0.932584	0.999841
YER186C	-0.0713995	0.999841
YER188W	-1.44147	0.999841
YFL001W	-0.158867	0.999841
YFL002C	-0.241592	0.999841
YFL003C	-0.68166	0.999841
YFL004W	-0.126225	0.999841
YFL005W	0.176821	0.999841
YFL007W	0.00666399	0.999841
YFL008W	0.0365582	0.999841
YFL009W	-0.140585	0.999841
YFL010C	0.040156	0.999841
YFL013C	0.181141	0.999841
YFL014W	-0.0858565	0.999841
YFL016C	0.134256	0.999841
YFL017C	-0.364586	0.999841
YFL017W-A	0.468405	0.999841
YFL018C	0.176414	0.999841
YFL020C	-1.86122	0.999841
YFL021W	-0.0676105	0.999841
YFL022C	-0.0686532	0.999841
YFL023W	0.329792	0.999841
YFL024C	0.187756	0.999841
YFL025C	-0.268202	0.999841
YFL026W	1.22971	0.999841
YFL027C	-0.445133	0.999841
YFL028C	-0.337321	0.999841
YFL029C	-0.0160289	0.999841
YFL030W	0.935111	0.999841
YFL031W	0.0444534	0.999841
YFL033C	0.0679411	0.999841
YFL034C-A	0.124593	0.999841
YFL034C-B	0.48133	0.999841
YFL034W	0.0510475	0.999841
YFL036W	0.0481151	0.999841
YFL037W	0.0671065	0.999841
YFL038C	0.0852579	0.999841
YFL039C	-0.175646	0.999841
YFL041W	-0.295652	0.999841
YFL042C	-0.0703731	0.999841
YFL044C	0.0604359	0.999841
YFL045C	-0.296821	0.999841
YFL046W	-0.121536	0.999841
YFL047W	0.0868357	0.999841
YFL048C	-0.0174124	0.999841
YFL049W	0.169335	0.999841
YFL050C	1.81406	0.999841
YFL052W	1.69434	0.999841
YFL053W	1.06563	0.999841
YFL054C	-0.446676	0.999841
YFL055W	0.622214	0.999841
YFL057C	-0.340206	0.999841
YFR001W	0.147006	0.999841
YFR002W	0.0294255	0.999841
YFR003C	-0.328174	0.999841
YFR004W	0.0898435	0.999841
YFR005C	0.0304131	0.999841
YFR006W	0.002097	0.999841
YFR007W	-0.163718	0.999841
YFR008W	-0.209428	0.999841
YFR009W	0.0391118	0.999841
YFR010W	0.0843248	0.999841
YFR011C	0.0985185	0.999841
YFR013W	0.189084	0.999841
YFR014C	-0.0173098	0.999841
YFR015C	0.0997573	0.999841
YFR016C	0.168854	0.999841
YFR017C	-0.184378	0.999841
YFR018C	0.38738	0.999841
YFR019W	0.144886	0.999841
YFR020W	-0.61998	0.999841
YFR021W	-0.075787	0.999841
YFR022W	-0.0592673	0.999841
YFR024C-A	-0.151262	0.999841
YFR025C	-0.203585	0.999841
YFR026C	2.76478	0.999841
YFR027W	0.00752327	0.999841
YFR028C	0.0645553	0.999841
YFR029W	-0.224289	0.999841
YFR030W	0.172525	0.999841
YFR031C	0.264425	0.999841
YFR031C-A	-0.198726	0.999841
YFR032C-A	0.0145505	0.999841
YFR033C	0.29738	0.999841
YFR034C	0.175146	0.999841
YFR034W-A	-1.63903	0.999841
YFR037C	0.090268	0.999841
YFR038W	0.0696893	0.999841
YFR039C	-0.179125	0.999841
YFR040W	0.152034	0.999841
YFR041C	-0.190779	0.999841
YFR042W	-0.150781	0.999841
YFR043C	0.245786	0.999841
YFR044C	-0.0652528	0.999841
YFR045W	-0.75862	0.999841
YFR046C	-0.0434267	0.999841
YFR047C	-0.21563	0.999841
YFR048W	-0.0435653	0.999841
YFR049W	0.192816	0.999841
YFR050C	-0.0606754	0.999841
YFR051C	0.000883204	0.999841
YFR052W	0.110681	0.999841
YFR053C	0.052148	0.999841
YFR055W	-0.929719	0.999841
YGL001C	-0.0460226	0.999841
YGL002W	-0.335363	0.999841
YGL003C	0.34361	0.999841
YGL004C	-0.0664558	0.999841
YGL005C	0.250368	0.999841
YGL006W	-0.0875488	0.999841
YGL006W-A	-0.511352	0.999841
YGL008C	-0.170744	0.999841
YGL009C	0.0503451	0.999841
YGL010W	-0.364052	0.999841
YGL011C	0.109809	0.999841
YGL012W	-0.0308651	0.999841
YGL013C	0.184751	0.999841
YGL014W	-0.104295	0.999841
YGL016W	0.0501841	0.999841
YGL017W	0.183549	0.999841
YGL018C	-0.159164	0.999841
YGL019W	-0.076727	0.999841
YGL020C	-0.0898843	0.999841
YGL021W	-0.119456	0.999841
YGL022W	0.0113442	0.999841
YGL023C	-0.00471764	0.999841
YGL025C	-0.0287168	0.999841
YGL026C	-0.0720995	0.999841
YGL027C	-0.0406502	0.999841
YGL028C	0.00403793	0.999841
YGL029W	-0.313976	0.999841
YGL030W	-0.270764	0.999841
YGL031C	-0.0506129	0.999841
YGL032C	-0.507125	0.999841
YGL035C	0.273338	0.999841
YGL036W	0.203959	0.999841
YGL037C	-0.0300652	0.999841
YGL038C	-0.0730653	0.999841
YGL039W	-0.349613	0.999841
YGL040C	-0.105849	0.999841
YGL041W-A	0.247896	0.999841
YGL043W	-0.0439085	0.999841
YGL044C	0.20179	0.999841
YGL045W	-0.480405	0.999841
YGL047W	0.344911	0.999841
YGL048C	0.0457703	0.999841
YGL049C	0.186491	0.999841
YGL050W	-0.0160088	0.999841
YGL054C	0.0504642	0.999841
YGL055W	-0.157921	0.999841
YGL056C	0.336172	0.999841
YGL057C	0.0989163	0.999841
YGL058W	0.0957699	0.999841
YGL059W	0.0350972	0.999841
YGL060W	0.138885	0.999841
YGL061C	0.10365	0.999841
YGL062W	-0.027081	0.999841
YGL063W	-0.579635	0.999841
YGL064C	0.363954	0.999841
YGL065C	0.0993448	0.999841
YGL066W	-0.143224	0.999841
YGL067W	-0.251234	0.999841
YGL068W	-0.146836	0.999841
YGL070C	-0.0172624	0.999841
YGL071W	-0.190007	0.999841
YGL072C	0.869651	0.999841
YGL073W	0.171401	0.999841
YGL075C	-0.666017	0.999841
YGL076C	-0.0777129	0.999841
YGL077C	-0.167342	0.999841
YGL078C	0.105033	0.999841
YGL079W	-0.0926436	0.999841
YGL080W	-0.0164914	0.999841
YGL081W	0.525607	0.999841
YGL082W	0.0149544	0.999841
YGL083W	-0.050148	0.999841
YGL084C	-0.0305112	0.999841
YGL085W	-0.617223	0.999841
YGL086W	-0.201839	0.999841
YGL087C	-0.190645	0.999841
YGL088W	-0.300638	0.999841
YGL089C	-0.889609	0.999841
YGL090W	0.186913	0.999841
YGL091C	-0.0809865	0.999841
YGL092W	0.0623686	0.999841
YGL093W	0.377278	0.999841
YGL094C	0.305891	0.999841
YGL095C	0.00245677	0.999841
YGL096W	0.424586	0.999841
YGL097W	-0.000206083	0.999841
YGL098W	0.220698	0.999841
YGL099W	0.11599	0.999841
YGL100W	0.216919	0.999841
YGL101W	-0.126639	0.999841
YGL103W	-0.12559	0.999841
YGL104C	-0.235113	0.999841
YGL105W	0.050364	0.999841
YGL106W	0.0696864	0.999841
YGL107C	0.0933483	0.999841
YGL108C	0.43157	0.999841
YGL110C	0.51597	0.999841
YGL111W	-0.298263	0.999841
YGL112C	0.0746769	0.999841
YGL113W	-0.154866	0.999841
YGL114W	-0.225171	0.999841
YGL115W	-0.0829497	0.999841
YGL116W	-0.130046	0.999841
YGL117W	-1.2111	0.999841
YGL119W	-0.0553211	0.999841
YGL120C	0.0506066	0.999841
YGL121C	0.355157	0.999841
YGL122C	-0.188928	0.999841
YGL123W	-0.286717	0.999841
YGL124C	-0.143521	0.999841
YGL125W	-0.123953	0.999841
YGL127C	0.0689896	0.999841
YGL128C	-0.256334	0.999841
YGL129C	-0.356426	0.999841
YGL130W	-0.0634299	0.999841
YGL131C	0.719544	0.999841
YGL133W	0.210748	0.999841
YGL134W	0.0131776	0.999841
YGL135W	-0.204749	0.999841
YGL136C	-0.486284	0.999841
YGL137W	-0.011325	0.999841
YGL139W	-0.0721783	0.999841
YGL140C	-0.169907	0.999841
YGL141W	0.0771804	0.999841
YGL142C	-0.228831	0.999841
YGL143C	-0.249475	0.999841
YGL144C	-0.33647	0.999841
YGL145W	0.187418	0.999841
YGL146C	-0.668669	0.999841
YGL147C	-0.12861	0.999841
YGL148W	-0.0839473	0.999841
YGL150C	0.00956511	0.999841
YGL151W	0.0173471	0.999841
YGL153W	0.132217	0.999841
YGL154C	-0.495438	0.999841
YGL155W	-0.372976	0.999841
YGL156W	0.169817	0.999841
YGL157W	0.00744962	0.999841
YGL158W	0.953844	0.999841
YGL159W	0.0883705	0.999841
YGL160W	-0.350198	0.999841
YGL161C	-0.125831	0.999841
YGL162W	-0.13989	0.999841
YGL163C	0.175228	0.999841
YGL164C	-0.203921	0.999841
YGL166W	-0.337662	0.999841
YGL167C	-0.269285	0.999841
YGL169W	0.134442	0.999841
YGL171W	0.38307	0.999841
YGL172W	-0.124326	0.999841
YGL173C	0.0746012	0.999841
YGL174W	0.232415	0.999841
YGL175C	0.122809	0.999841
YGL176C	-0.31993	0.999841
YGL178W	-0.465923	0.999841
YGL179C	0.202627	0.999841
YGL180W	-0.110201	0.999841
YGL181W	-0.0413306	0.999841
YGL184C	-1.50094	0.999841
YGL185C	-0.113667	0.999841
YGL186C	-0.177114	0.999841
YGL187C	-0.16148	0.999841
YGL189C	-0.0166502	0.999841
YGL190C	0.0147756	0.999841
YGL191W	0.0353259	0.999841
YGL193C	-0.551136	0.999841
YGL194C	-0.16509	0.999841
YGL194C-A	0.540881	0.999841
YGL195W	0.126426	0.999841
YGL196W	-0.146407	0.999841
YGL197W	0.0380289	0.999841
YGL198W	-0.240137	0.999841
YGL200C	-0.0744301	0.999841
YGL201C	0.104481	0.999841
YGL202W	-0.180996	0.999841
YGL203C	0.238501	0.999841
YGL204C	0.534048	0.999841
YGL205W	-0.602083	0.999841
YGL206C	0.0942238	0.999841
YGL207W	0.0501774	0.999841
YGL208W	0.235187	0.999841
YGL209W	0.0578634	0.999841
YGL210W	0.0691738	0.999841
YGL211W	-0.135688	0.999841
YGL212W	0.396566	0.999841
YGL213C	-0.00430461	0.999841
YGL215W	0.936415	3.15556e-06
YGL216W	0.00891522	0.999841
YGL219C	0.180051	0.999841
YGL220W	-0.233074	0.999841
YGL221C	-0.00466673	0.999841
YGL222C	0.37564	0.999841
YGL223C	0.223062	0.999841
YGL224C	-0.465294	0.999841
YGL225W	-0.18009	0.999841
YGL226C-A	0.0111654	0.999841
YGL226W	0.410622	0.999841
YGL227W	0.403758	0.999841
YGL228W	-0.0230354	0.999841
YGL229C	-0.148327	0.999841
YGL231C	0.149666	0.999841
YGL232W	-0.0491481	0.999841
YGL233W	-0.00226444	0.999841
YGL234W	-0.144824	0.999841
YGL236C	-0.38111	0.999841
YGL237C	-0.293439	0.999841
YGL238W	0.158612	0.999841
YGL240W	0.408606	0.999841
YGL241W	0.0286714	0.999841
YGL242C	0.0492679	0.999841
YGL243W	-0.0218796	0.999841
YGL244W	0.190288	0.999841
YGL245W	0.120888	0.999841
YGL246C	-0.139234	0.999841
YGL247W	0.29678	0.999841
YGL248W	0.201515	0.999841
YGL250W	0.32108	0.999841
YGL251C	-0.859274	0.999841
YGL252C	0.0993706	0.999841
YGL253W	0.0829578	0.999841
YGL254W	-0.345214	0.999841
YGL255W	-0.14583	0.999841
YGL256W	-0.433194	0.999841
YGL257C	-0.113705	0.999841
YGL258W	-1.87512	0.999841
YGR001C	0.0990288	0.999841
YGR002C	-0.0917746	0.999841
YGR003W	-0.00106307	0.999841
YGR004W	0.0393689	0.999841
YGR005C	0.302783	0.999841
YGR006W	-0.0247399	0.999841
YGR007W	0.149712	0.999841
YGR008C	-0.11263	0.999841
YGR009C	0.321955	0.999841
YGR012W	0.252321	0.999841
YGR013W	0.0649182	0.999841
YGR014W	-0.322443	0.999841
YGR015C	-0.149391	0.999841
YGR016W	1.1807	0.999841
YGR017W	0.105947	0.999841
YGR019W	-0.0438867	0.999841
YGR020C	-0.0550635	0.999841
YGR021W	0.378805	0.999841
YGR023W	-0.221721	0.999841
YGR024C	-0.227059	0.999841
YGR026W	0.148599	0.999841
YGR027C	-0.101464	0.999841
YGR028W	-0.0351876	0.999841
YGR029W	0.0853312	0.999841
YGR030C	0.489111	0.999841
YGR031W	0.272183	0.999841
YGR032W	-0.279577	0.999841
YGR033C	0.0258139	0.999841
YGR034W	-0.192861	0.999841
YGR035C	-0.0284919	0.999841
YGR036C	-0.301571	0.999841
YGR037C	-0.239912	0.999841
YGR038W	-0.385252	0.999841
YGR039W	-0.702854	0.999841
YGR040W	-0.195301	0.999841
YGR041W	-0.225312	0.999841
YGR042W	-0.0663659	0.999841
YGR043C	-0.263766	0.999841
YGR044C	-0.231771	0.999841
YGR045C	1.16173	0.999841
YGR046W	0.210793	0.999841
YGR047C	0.120683	0.999841
YGR048W	0.240824	0.999841
YGR049W	0.207393	0.999841
YGR050C	-0.0581636	0.999841
YGR052W	-0.167837	0.999841
YGR053C	-0.472466	0.999841
YGR054W	0.465271	0.999841
YGR055W	-0.0604614	0.999841
YGR056W	-0.0120355	0.999841
YGR057C	0.631174	0.999841
YGR058W	0.00844469	0.999841
YGR059W	1.45635	0.999841
YGR060W	-0.0688371	0.999841
YGR061C	-0.000648582	0.999841
YGR062C	0.00598164	0.999841
YGR063C	-0.164494	0.999841
YGR065C	-0.289775	0.999841
YGR067C	0.0696171	0.999841
YGR068C	0.218709	0.999841
YGR070W	0.0179069	0.999841
YGR071C	-0.0383353	0.999841
YGR072W	0.157175	0.999841
YGR073C	-0.0604598	0.999841
YGR074W	-0.505976	0.999841
YGR075C	-0.300915	0.999841
YGR076C	0.0580837	0.999841
YGR077C	0.103606	0.999841
YGR078C	-0.0240663	0.999841
YGR079W	-0.079938	0.999841
YGR080W	0.0418609	0.999841
YGR081C	0.30223	0.999841
YGR082W	0.0755011	0.999841
YGR083C	0.109443	0.999841
YGR084C	0.144684	0.999841
YGR085C	-0.0609662	0.999841
YGR086C	0.103578	0.999841
YGR087C	0.799207	0.999841
YGR088W	0.117344	0.999841
YGR089W	0.00792391	0.999841
YGR090W	0.0505486	0.999841
YGR091W	-0.0332808	0.999841
YGR092W	0.164002	0.999841
YGR093W	-0.0316498	0.999841
YGR094W	-0.055065	0.999841
YGR095C	0.0353445	0.999841
YGR096W	0.460493	0.999841
YGR097W	-0.0585983	0.999841
YGR098C	0.146696	0.999841
YGR099W	0.271345	0.999841
YGR100W	-0.0255084	0.999841
YGR101W	-0.398798	0.999841
YGR102C	-0.301749	0.999841
YGR103W	0.164768	0.999841
YGR104C	-0.0525137	0.999841
YGR105W	-0.00160589	0.999841
YGR106C	0.0494401	0.999841
YGR108W	-0.277687	0.999841
YGR109C	0.448308	0.999841
YGR110W	-0.958838	0.999841
YGR111W	-0.0200849	0.999841
YGR112W	0.273425	0.999841
YGR113W	0.208708	0.999841
YGR116W	0.145926	0.999841
YGR117C	-0.0651068	0.999841
YGR118W	0.0100226	0.999841
YGR119C	-0.0977079	0.999841
YGR120C	-0.0884409	0.999841
YGR121C	-0.398946	0.999841
YGR122C-A	0.013789	0.999841
YGR122W	0.130998	0.999841
YGR123C	-0.169819	0.999841
YGR124W	-0.00198642	0.999841
YGR125W	0.0774961	0.999841
YGR127W	0.356536	0.999841
YGR128C	-0.0855325	0.999841
YGR129W	0.546707	0.999841
YGR130C	0.0532304	0.999841
YGR131W	-0.430966	0.999841
YGR132C	-0.0295489	0.999841
YGR133W	-0.0317811	0.999841
YGR134W	-0.438831	0.999841
YGR135W	0.0207872	0.999841
YGR137W	-0.140353	0.999841
YGR138C	-0.0179369	0.999841
YGR140W	0.191705	0.999841
YGR141W	0.177319	0.999841
YGR142W	0.252161	0.999841
YGR143W	-0.125006	0.999841
YGR145W	0.289725	0.999841
YGR146C	-0.469389	0.999841
YGR147C	-0.0507976	0.999841
YGR148C	0.015032	0.999841
[truncated: 3,341 more rows]
