# Supplementary material for: Yeast eIF2A has a minimal role in translation initiation and uORF-mediated translational control in vivo
Source: eLife. 2024 Jan 24;12:RP92916. doi: 10.7554/eLife.92916 (PMC10945734; doi:10.7554/eLife.92916)
Supplement: Figure 2—source data 2. [file elife-92916-fig2-data2.xlsx]

## Sheet: Sheet1
gene_ID	TE changes (log2FoldChange WT+SM vs WT)	padj (FDR)
YAL001C	-0.102008	0.698478
YAL002W	0.537278	0.0403588
YAL003W	-0.596536	3.38663e-06
YAL005C	0.206899	0.464001
YAL007C	-0.260465	0.186953
YAL008W	-0.0845078	0.801584
YAL009W	-1.90747	6.4464e-05
YAL010C	0.113673	0.800828
YAL011W	0.689947	0.063477
YAL012W	-0.00931766	0.95623
YAL013W	-0.231895	0.467283
YAL014C	-0.460711	0.173653
YAL015C	0.518642	0.127193
YAL016W	-0.172489	0.226231
YAL017W	-0.0717783	0.750574
YAL018C	1.96562	0.376338
YAL019W	-0.681556	0.000106032
YAL020C	-1.63588	0.000448108
YAL021C	0.132245	0.505535
YAL022C	-1.49808	6.41627e-13
YAL023C	-1.29349	8.06402e-18
YAL024C	1.01821	8.19531e-05
YAL025C	0.317371	0.254825
YAL026C	-0.25567	0.182749
YAL026C-A	-0.509758	0.583831
YAL027W	-0.238188	0.657009
YAL028W	-0.238106	0.676261
YAL029C	-0.236675	0.303312
YAL030W	0.708913	0.0108953
YAL031C	-1.18084	5.76752e-06
YAL032C	0.446325	0.225959
YAL033W	0.478508	0.153807
YAL034C	1.7113	5.67369e-06
YAL034W-A	0.220739	0.742873
YAL035W	1.23797	1.34955e-37
YAL036C	-0.0956895	0.680038
YAL037W	0.846641	0.503664
YAL038W	-0.388608	2.11751e-05
YAL039C	0.766804	0.00580386
YAL040C	-1.94028	4.47757e-08
YAL041W	-0.495464	0.00687971
YAL042W	-1.53686	1.25059e-16
YAL043C	-0.288765	0.150011
YAL044C	-0.536592	0.000680124
YAL044W-A	0.365258	0.276729
YAL046C	-0.258424	0.495929
YAL047C	-0.147434	0.786248
YAL049C	-1.7993	7.42895e-15
YAL051W	0.297047	0.274191
YAL053W	-0.23942	0.190079
YAL054C	0.252323	0.763882
YAL055W	1.11864	0.0184545
YAL056W	-0.882229	0.000820233
YAL058W	-1.33409	0.000175077
YAL059W	-0.253179	0.519167
YAL060W	-0.362351	0.0781288
YAL061W	0.43015	0.13263
YAL062W	-1.25142	0.102868
YAL063C	4.18981	0.0112982
YAL064W-B	0.183059	0.958705
YAL067C	-1.70729	0.430824
YAR002C-A	-1.40363	1.00073e-18
YAR002W	0.889299	5.38836e-07
YAR003W	-2.04389	9.01267e-10
YAR007C	0.305249	0.127559
YAR008W	-0.396767	0.487627
YAR014C	-1.65524	4.19959e-15
YAR015W	0.381228	0.0270297
YAR018C	0.331512	0.311721
YAR019C	0.0163601	0.971075
YAR023C	1.72039	0.449324
YAR027W	-0.175977	0.48145
YAR028W	0.0471602	0.912765
YAR029W	-1.07827	0.738054
YAR031W	-0.754817	0.0627584
YAR033W	-0.207241	0.676056
YAR035W	2.00746	5.1217e-05
YAR042W	0.457252	0.0349313
YAR047C	1.01241	0.777596
YAR050W	3.39641	0.00462796
YAR071W	-1.204	0.00683166
YBL001C	0.259304	0.197492
YBL002W	0.554998	1.04096e-05
YBL003C	0.603168	1.75927e-07
YBL004W	-0.382774	0.0483489
YBL005W	-0.773304	0.00632325
YBL006C	-0.587383	0.0542878
YBL007C	0.0562591	0.81285
YBL008W	0.159022	0.668612
YBL009W	0.922405	0.000472953
YBL010C	0.920022	0.0198002
YBL011W	-0.762397	0.000359302
YBL014C	-0.59743	0.185284
YBL015W	-0.770719	0.000541138
YBL016W	0.072291	0.830809
YBL017C	-1.70926	1.08092e-47
YBL018C	1.12556	0.0013107
YBL019W	0.539306	0.222531
YBL020W	-2.35683	6.05379e-21
YBL021C	-0.319781	0.554248
YBL022C	-0.42695	0.00942451
YBL023C	0.726977	0.000115492
YBL024W	0.658523	1.32115e-07
YBL025W	0.522242	0.290064
YBL026W	1.08576	8.20035e-07
YBL027W	0.230496	0.0676968
YBL028C	1.61831	3.93081e-11
YBL029C-A	1.47994	7.02926e-05
YBL029W	0.649067	0.252432
YBL030C	-0.274989	0.0702746
YBL031W	1.6117	0.000226354
YBL032W	-1.2439	4.23943e-12
YBL033C	-0.10368	0.735596
YBL034C	0.168977	0.55822
YBL035C	0.367596	0.146815
YBL036C	0.425619	0.0412589
YBL037W	0.516176	0.0109103
YBL038W	0.78579	0.00248432
YBL039C	0.173597	0.265169
YBL039W-B	-0.443013	0.67779
YBL040C	-0.459476	0.0215953
YBL041W	0.429289	0.0147832
YBL042C	-1.25981	2.79934e-09
YBL043W	0.831738	0.583998
YBL045C	0.648253	4.32643e-05
YBL046W	0.37734	0.243494
YBL047C	-0.178203	0.31801
YBL048W	-1.001	0.792913
YBL050W	-0.885713	8.71749e-07
YBL051C	-0.105444	0.615241
YBL052C	0.0242139	0.965073
YBL054W	-0.324512	0.327039
YBL055C	-1.19352	5.81537e-05
YBL056W	-0.169859	0.336981
YBL057C	-0.029055	0.93431
YBL058W	0.195269	0.314017
YBL059C-A	0.0922765	0.856036
YBL059W	1.08964	0.0438459
YBL060W	-0.135512	0.752573
YBL061C	0.137763	0.634588
YBL063W	-0.805628	0.020028
YBL064C	0.516593	0.0794563
YBL066C	-0.267161	0.416333
YBL067C	-0.462686	0.0676968
YBL068W	0.272848	0.197422
YBL071W-A	0.893854	0.00639054
YBL072C	0.686274	1.29103e-09
YBL074C	-0.211477	0.664176
YBL075C	-0.819776	0.150955
YBL076C	0.149965	0.303835
YBL078C	1.18958	0.00563694
YBL079W	-0.733633	2.32257e-06
YBL080C	0.189858	0.711562
YBL081W	-0.160152	0.635375
YBL084C	-0.322148	0.280408
YBL085W	0.850496	2.27644e-06
YBL086C	0.178255	0.622313
YBL087C	0.369222	0.00330756
YBL088C	-0.452091	0.154317
YBL089W	-1.32735	3.8032e-06
YBL090W	-0.242014	0.47939
YBL091C	0.537735	8.75536e-05
YBL091C-A	-0.374277	0.473169
YBL092W	0.433785	4.46741e-05
YBL093C	-0.36241	0.209863
YBL095W	0.959993	0.00530357
YBL097W	0.949388	9.13241e-05
YBL098W	-0.907677	0.00162129
YBL099W	0.516351	2.51197e-07
YBL101C	0.479112	0.00395752
YBL102W	-1.30297	3.59896e-13
YBL103C	0.168604	0.548619
YBL104C	0.631439	0.0090394
YBL105C	-1.14555	5.64098e-10
YBL106C	0.0550287	0.909755
YBL107C	0.0322836	0.9586
YBL113C	-0.091909	0.671285
YBR001C	-0.168637	0.506722
YBR002C	0.305561	0.331502
YBR003W	-0.773009	0.000720853
YBR004C	-1.96689	1.21443e-08
YBR005W	0.487505	0.0931982
YBR006W	-0.686918	0.0138699
YBR007C	0.30855	0.278141
YBR008C	-1.1943	0.624232
YBR009C	1.87338	9.37311e-67
YBR010W	1.41668	5.42197e-29
YBR011C	0.145684	0.270278
YBR012C	1.04529	0.657087
YBR013C	-0.257753	0.736728
YBR014C	0.0116074	0.970847
YBR015C	-2.00172	8.68394e-34
YBR016W	0.14802	0.63171
YBR017C	-0.206086	0.256278
YBR018C	1.81917	0.351202
YBR019C	-0.867956	0.40179
YBR020W	-0.926796	0.752573
YBR021W	-0.551512	0.123713
YBR022W	-0.664178	0.11391
YBR023C	-0.637139	7.67718e-06
YBR024W	-0.0887981	0.841624
YBR025C	0.435064	0.000537038
YBR026C	0.498689	0.00866691
YBR028C	-0.160382	0.589148
YBR029C	-1.14511	1.21443e-08
YBR030W	0.113339	0.770204
YBR031W	-1.00701	2.6164e-19
YBR033W	-1.4552	0.28182
YBR034C	0.414019	0.0257605
YBR035C	0.277544	0.0602436
YBR036C	-1.18326	8.53312e-13
YBR037C	-0.966753	0.000292578
YBR038W	0.56403	8.16676e-05
YBR039W	-0.216754	0.286824
YBR041W	-0.721025	0.000100903
YBR042C	-0.788971	0.0121977
YBR043C	0.0560179	0.893773
YBR044C	-0.299909	0.432716
YBR045C	-2.05149	0.00446194
YBR046C	0.884787	0.000130956
YBR047W	-0.268502	0.628917
YBR048W	0.838128	8.17998e-15
YBR049C	0.623203	0.000342091
YBR050C	0.552061	0.780475
YBR052C	-0.060077	0.823474
YBR053C	0.355117	0.0557613
YBR054W	0.550717	0.00297487
YBR055C	0.495456	0.0461448
YBR056W	-0.295392	0.104089
YBR056W-A	0.300748	0.576059
YBR057C	-0.300467	0.249057
YBR058C	-0.288446	0.152831
YBR058C-A	-0.349155	0.249647
YBR059C	-0.554286	0.000995366
YBR060C	0.107532	0.748638
YBR061C	-0.0164967	0.961468
YBR062C	0.0598015	0.907983
YBR063C	4.3305	0.0151494
YBR065C	0.654033	0.022148
YBR066C	-0.263561	0.502808
YBR067C	0.224911	0.282049
YBR068C	0.181083	0.172921
YBR069C	-1.09139	6.55961e-07
YBR070C	-1.49999	0.000521594
YBR071W	-0.425416	0.0928952
YBR072W	0.169115	0.660675
YBR073W	0.668511	0.000324356
YBR074W	-1.07342	9.36182e-12
YBR076C-A	0.193417	0.9146
YBR076W	-3.66043	0.0227638
YBR077C	-0.180835	0.608307
YBR078W	0.350704	0.000448108
YBR079C	1.00884	2.24458e-21
YBR080C	0.293008	0.0495702
YBR081C	0.742449	1.73541e-05
YBR082C	0.499351	0.000451176
YBR083W	0.811622	5.60893e-06
YBR084C-A	0.426992	0.000249471
YBR084W	-0.417401	0.0019011
YBR085C-A	0.86891	1.41009e-05
YBR085W	-1.52421	0.00414865
YBR086C	-1.18733	7.53357e-21
YBR087W	0.371256	0.169964
YBR088C	0.925699	6.4471e-10
YBR089C-A	0.542064	0.0145131
YBR091C	-1.03951	0.013534
YBR092C	-0.988186	2.70426e-11
YBR093C	-1.60146	2.9544e-14
YBR094W	-0.810627	0.000459595
YBR095C	1.19995	3.09065e-07
YBR096W	-0.215682	0.264031
YBR097W	0.639591	0.0103271
YBR098W	-0.669219	0.150796
YBR099C	0.0913035	0.981694
YBR101C	0.11673	0.660675
YBR102C	-0.720505	0.00119913
YBR103W	0.395529	0.160777
YBR104W	0.683162	0.00111197
YBR105C	-0.0421309	0.924094
YBR106W	-1.23237	2.85615e-19
YBR107C	-0.665072	0.414131
YBR108W	0.572737	0.0649207
YBR109C	0.138795	0.332119
YBR110W	-1.47443	3.09942e-10
YBR111C	0.141539	0.506624
YBR111W-A	0.689909	0.0931982
YBR112C	0.70842	3.79476e-07
YBR114W	1.09454	0.000116987
YBR115C	-0.321167	0.799942
YBR118W	-0.0359609	0.77492
YBR119W	1.14025	4.70693e-05
YBR120C	0.376543	0.378548
YBR121C	0.350031	0.00707388
YBR122C	-0.0298586	0.935566
YBR123C	0.560337	0.049101
YBR125C	-0.697529	0.0171963
YBR126C	-0.227965	0.22715
YBR127C	0.164067	0.118318
YBR128C	0.16256	0.839714
YBR129C	-0.696418	0.047925
YBR130C	0.466625	0.0420297
YBR131W	1.17467	7.01868e-05
YBR132C	-0.610435	0.00279204
YBR133C	-1.24989	3.59629e-08
YBR135W	-1.50715	1.5596e-06
YBR136W	0.16031	0.627122
YBR137W	0.670326	0.00128889
YBR138C	0.937454	0.00114081
YBR139W	-0.60446	4.88559e-05
YBR140C	-0.05947	0.77721
YBR141C	1.02684	0.0186626
YBR142W	0.320418	0.191474
YBR143C	-0.1453	0.358811
YBR145W	0.02335	0.936651
YBR146W	-1.12121	7.12281e-06
YBR147W	0.335756	0.533914
YBR148W	-2.06813	0.00947134
YBR149W	-0.35205	0.024088
YBR150C	0.464485	0.170365
YBR151W	-1.06708	2.97105e-05
YBR152W	0.937627	0.0216366
YBR153W	1.17462	0.000841676
YBR154C	0.929934	7.41597e-08
YBR155W	0.591003	0.0184236
YBR156C	0.879931	0.00775322
YBR157C	-0.74338	0.0336999
YBR158W	-0.548021	0.00228849
YBR159W	0.143833	0.468605
YBR160W	0.362216	0.0831862
YBR161W	-0.380743	0.233348
YBR162C	-0.398025	0.000224748
YBR162W-A	0.232926	0.434193
YBR163W	-1.06793	0.0165695
YBR164C	0.948077	4.23355e-07
YBR165W	-0.350713	0.270837
YBR166C	0.189373	0.432716
YBR167C	0.703019	0.096306
YBR168W	-0.844688	0.0262967
YBR169C	0.272535	0.151738
YBR170C	0.0371802	0.874677
YBR171W	0.817791	8.30299e-05
YBR172C	-0.748666	8.88733e-05
YBR173C	0.165385	0.566583
YBR174C	-5.24911	0.134821
YBR175W	-1.32072	4.18303e-05
YBR176W	0.3635	0.22984
YBR177C	-0.359668	0.0396939
YBR179C	0.13818	0.761633
YBR181C	0.496385	2.50023e-05
YBR182C	1.21054	0.0031567
YBR183W	0.379677	0.213293
YBR184W	1.92737	0.00911877
YBR185C	-0.19271	0.62254
YBR186W	-0.313039	0.808175
YBR187W	-0.983896	3.89873e-09
YBR188C	-0.0104782	0.98896
YBR189W	-0.724138	7.22695e-09
YBR192W	-0.217578	0.478672
YBR193C	-0.0203261	0.969436
YBR194W	0.936024	0.0716865
YBR195C	0.0721958	0.8533
YBR196C	0.17662	0.0915154
YBR197C	-0.464402	0.259072
YBR198C	0.379244	0.0245592
YBR199W	-0.318097	0.10725
YBR200W	0.556057	0.0114568
YBR201C-A	2.04831	0.13841
YBR201W	0.453359	0.35997
YBR202W	0.0847137	0.684024
YBR203W	-0.308325	0.502852
YBR204C	-0.240685	0.464448
YBR205W	-0.727563	9.48144e-05
YBR207W	-0.419725	0.063473
YBR208C	-1.71054	2.6464e-09
YBR210W	0.144172	0.759244
YBR211C	-0.157588	0.677313
YBR212W	-0.151624	0.487726
YBR213W	1.17051	0.012184
YBR214W	-0.119046	0.59807
YBR215W	0.829937	0.00217087
YBR216C	0.197977	0.395542
YBR217W	-0.229492	0.748852
YBR218C	-0.577399	3.69152e-06
YBR221C	0.0278139	0.854314
YBR222C	-0.972355	2.12286e-07
YBR223C	0.146847	0.789636
YBR225W	0.48948	0.0644492
YBR228W	-0.192961	0.75774
YBR229C	-1.73422	2.14205e-24
YBR230C	0.716989	0.00056756
YBR230W-A	0.0590851	0.947347
YBR231C	1.12571	0.00175052
YBR233W	0.537835	0.0817108
YBR233W-A	0.513142	0.273334
YBR234C	-0.0656937	0.722247
YBR235W	-1.62503	3.88545e-13
YBR236C	0.588954	0.0048621
YBR237W	0.891603	0.00140443
YBR238C	-0.210679	0.496871
YBR239C	0.939987	0.0178422
YBR240C	0.770563	0.459699
YBR241C	-0.824842	0.00746414
YBR242W	-0.30721	0.371257
YBR243C	-1.65022	5.58806e-13
YBR244W	0.514709	0.0133814
YBR245C	0.701382	1.28718e-06
YBR246W	-0.204307	0.52433
YBR247C	0.408896	0.151738
YBR248C	0.242775	0.107095
YBR249C	0.281538	0.032028
YBR250W	-0.0734086	0.970634
YBR251W	0.11748	0.698478
YBR252W	0.875996	1.57866e-06
YBR253W	0.245201	0.581365
YBR254C	-0.00256055	0.995595
YBR255C-A	1.36232	0.0162724
YBR255W	1.24637	6.22788e-06
YBR256C	1.02493	3.48828e-11
YBR257W	-0.096747	0.840209
YBR258C	1.16513	0.0101142
YBR259W	0.453793	0.380895
YBR260C	0.110784	0.642597
YBR261C	0.145611	0.639817
YBR262C	0.101457	0.832409
YBR263W	-2.95229	5.09526e-91
YBR264C	0.367748	0.303986
YBR265W	-0.136699	0.642269
YBR267W	0.0549466	0.884704
YBR268W	0.342055	0.411556
YBR269C	0.186335	0.63851
YBR270C	-0.647909	0.36954
YBR271W	-1.18405	0.00457969
YBR272C	-0.0136598	0.970847
YBR273C	0.469176	0.0191543
YBR274W	-1.07957	0.00059337
YBR275C	0.988079	4.61185e-07
YBR276C	-1.55106	9.13241e-05
YBR278W	0.390763	0.477069
YBR279W	0.653872	0.000718525
YBR280C	0.214022	0.488733
YBR281C	0.0942188	0.736616
YBR282W	0.505412	0.100808
YBR283C	-1.40484	7.59979e-25
YBR284W	-2.48882	0.00628338
YBR285W	0.407677	0.801584
YBR286W	-0.124787	0.347613
YBR287W	-1.16412	9.61557e-13
YBR288C	-0.0369176	0.90744
YBR289W	1.34344	4.05651e-07
YBR290W	1.61884	1.03419e-12
YBR291C	-0.679036	0.197342
YBR293W	-0.788552	0.217832
YBR294W	-0.795648	0.683351
YBR295W	0.612088	0.0639873
YBR296C	0.214692	0.917124
YBR297W	-0.882905	0.259633
YBR298C	1.14224	0.646996
YBR299W	-0.0942609	0.950201
YCL001W	0.0457231	0.850306
YCL002C	-1.7514	0.000121349
YCL004W	0.949777	0.0357241
YCL005W	-2.11289	1.13345e-07
YCL005W-A	-0.147351	0.506504
YCL008C	-1.62354	5.82666e-09
YCL009C	0.143102	0.408692
YCL010C	-1.49255	4.61623e-06
YCL011C	0.157066	0.347546
YCL012C	-0.0252197	0.967692
YCL014W	-0.660633	0.00483641
YCL016C	0.117807	0.760416
YCL017C	-0.0835221	0.702517
YCL021W-A	0.591444	0.850587
YCL024W	0.170434	0.650762
YCL025C	0.0579788	0.817876
YCL026C-A	1.48831	0.123848
YCL026C-B	0.641072	0.202257
YCL027W	0.0723192	0.884833
YCL028W	0.370678	0.0406992
YCL029C	-0.846142	0.00564513
YCL030C	0.1941	0.0952272
YCL031C	0.0974721	0.73527
YCL032W	-0.429312	0.270366
YCL033C	-0.0714902	0.870256
YCL034W	-1.06574	6.21387e-07
YCL035C	0.315833	0.115199
YCL036W	-0.459848	0.256437
YCL037C	-0.0249843	0.877172
YCL038C	0.147333	0.660675
YCL039W	0.146124	0.631893
YCL040W	-0.997194	1.14849e-12
YCL041C	-1.18375	7.78842e-07
YCL043C	-0.538772	0.000335762
YCL044C	-0.498723	0.0770144
YCL045C	-1.92209	9.28976e-45
YCL047C	0.597396	0.0625271
YCL049C	0.110052	0.824191
YCL050C	0.543175	0.00167707
YCL051W	-0.16558	0.663901
YCL052C	-1.18808	1.22636e-05
YCL054W	0.548005	0.000691374
YCL055W	0.473394	0.0702434
YCL056C	-0.525191	0.415562
YCL057C-A	0.835803	0.00110352
YCL057W	-1.45892	2.74682e-18
YCL058W-A	0.484844	0.389861
YCL059C	0.754128	0.00560425
YCL061C	1.05924	3.06884e-05
YCL063W	-0.802276	0.0170973
YCL064C	0.36648	0.0138265
YCR002C	0.0515631	0.80223
YCR003W	-0.200114	0.590838
YCR004C	0.00345949	0.988234
YCR005C	0.329597	0.136849
YCR007C	-1.07073	0.128453
YCR008W	-0.53927	0.0146245
YCR009C	1.04883	1.77693e-12
YCR010C	-0.785299	0.663041
YCR011C	-0.159506	0.356909
YCR012W	0.160187	0.231498
YCR014C	3.36269	0.0822678
YCR015C	-0.0838826	0.86852
YCR016W	0.409551	0.143132
YCR017C	-1.13537	5.3554e-14
YCR019W	0.0200506	0.970201
YCR020C	-2.17795	0.00534848
YCR020C-A	0.906369	0.00800715
YCR020W-B	0.498398	0.41655
YCR021C	0.439322	0.614316
YCR023C	-0.0153233	0.962677
YCR024C	0.0926697	0.872833
YCR024C-A	-1.62737	1.1992e-23
YCR024C-B	3.1433	0.141368
YCR025C	-0.391161	0.912939
YCR026C	0.265934	0.291618
YCR027C	0.221072	0.722247
YCR028C	-1.19353	2.36737e-07
YCR028C-A	0.8177	1.07149e-05
YCR030C	0.35974	0.0332876
YCR031C	0.0567738	0.690976
YCR032W	0.583534	0.00822818
YCR033W	0.467383	0.0239428
YCR034W	0.192583	0.380126
YCR035C	0.573699	0.00790182
YCR036W	-0.511398	0.0234956
YCR037C	-1.20927	5.10239e-10
YCR038C	1.14156	0.0211868
YCR042C	0.0374563	0.873338
YCR043C	-0.753734	0.0103708
YCR044C	-1.25238	5.00342e-07
YCR045C	-3.05849	0.171229
YCR045W-A	0.524144	0.870256
YCR046C	-0.849011	0.00665446
YCR047C	-1.4083	6.98883e-06
YCR048W	-2.06307	5.54565e-20
YCR051W	-1.01121	0.00161782
YCR052W	0.283863	0.154566
YCR053W	-0.365306	0.000768167
YCR054C	0.37206	0.200563
YCR057C	-0.638965	0.00021962
YCR059C	0.114898	0.761633
YCR061W	-0.75034	0.00137178
YCR063W	-0.192766	0.753596
YCR064C	-2.54379	0.300307
YCR065W	0.287735	0.11232
YCR066W	0.504609	0.12208
YCR067C	-0.595794	0.00129132
YCR068W	-0.723821	0.0219438
YCR069W	-1.11358	4.88696e-10
YCR071C	0.19617	0.654281
YCR072C	0.347144	0.158207
YCR073C	0.258309	0.660675
YCR073W-A	-0.647494	0.0136238
YCR075C	-2.32783	7.46848e-11
YCR075W-A	0.676302	0.220932
YCR076C	-0.967857	0.00111288
YCR077C	0.201182	0.26169
YCR079W	-1.38585	0.0323937
YCR081W	-0.480925	0.0576302
YCR082W	-1.52214	1.30098e-05
YCR083W	0.400048	0.327769
YCR084C	0.421463	0.00228849
YCR086W	0.358144	0.432177
YCR087C-A	-0.548311	0.0851923
YCR088W	0.651959	8.16676e-05
YCR089W	-0.673445	0.0209945
YCR090C	0.258516	0.416328
YCR091W	0.296762	0.541572
YCR092C	0.872666	6.18624e-05
YCR093W	0.152259	0.326777
YCR094W	-0.550872	0.0547997
YCR095C	-0.393983	0.272166
YCR095W-A	0.214398	0.958705
YCR098C	-0.790453	0.586611
YCR102C	-2.0321	0.000990263
YCR105W	0.566758	0.713888
YCR106W	0.168103	0.722528
YCR107W	2.90253	0.132132
YDL001W	0.451715	0.177321
YDL002C	-0.304922	0.33849
YDL003W	0.47323	0.0738663
YDL004W	0.914386	3.62427e-08
YDL005C	-0.0256024	0.942045
YDL006W	0.263923	0.474125
YDL007W	0.571148	0.000598278
YDL008W	0.0306962	0.9586
YDL010W	0.721635	0.0103411
YDL012C	-0.104765	0.752773
YDL013W	-0.0363577	0.917121
YDL014W	0.85218	1.55956e-13
YDL015C	-0.215494	0.127613
YDL017W	0.393688	0.300201
YDL018C	-1.25794	0.000482426
YDL019C	-0.265983	0.170743
YDL020C	-0.799542	0.000259913
YDL021W	1.49163	7.42629e-06
YDL022W	0.363432	0.00571866
YDL024C	0.134066	0.93314
YDL025C	0.623802	0.00406405
YDL027C	0.449523	0.248155
YDL028C	0.743174	0.00285946
YDL029W	0.121417	0.53693
YDL030W	0.340387	0.321674
YDL031W	0.970586	3.87182e-09
YDL033C	0.463395	0.469591
YDL035C	-0.0366284	0.914566
YDL036C	0.537904	0.139768
YDL039C	1.38657	0.391385
YDL040C	-0.314704	0.0510694
YDL042C	0.552862	0.0852591
YDL043C	1.14953	9.71018e-05
YDL044C	1.46185	9.64004e-07
YDL045C	-0.657649	0.0458583
YDL045W-A	-0.175382	0.714833
YDL046W	-0.0373336	0.875812
YDL048C	-0.556868	0.247106
YDL049C	1.18553	0.0831862
YDL051W	-0.390855	0.0279473
YDL052C	-1.24019	3.78779e-11
YDL053C	0.261495	0.320283
YDL054C	-1.32062	3.42195e-12
YDL055C	0.152463	0.178414
YDL056W	0.156569	0.573128
YDL057W	-0.142923	0.7778
YDL058W	-0.554487	0.00100898
YDL059C	0.282107	0.696415
YDL060W	0.245574	0.374519
YDL061C	-0.0606623	0.804063
YDL063C	-0.128749	0.685621
YDL064W	0.473177	0.0840744
YDL065C	0.98468	4.83123e-05
YDL066W	-1.42043	5.35314e-34
YDL067C	-1.60203	7.32236e-10
YDL069C	-0.747248	0.22715
YDL070W	0.426783	0.0239428
YDL072C	-0.288863	0.0895535
YDL073W	-1.13129	1.83015e-05
YDL074C	-0.104816	0.66899
YDL075W	1.75115	2.78715e-73
YDL076C	0.103931	0.725546
YDL077C	0.540687	0.0242326
YDL078C	0.348793	0.0840681
YDL079C	1.15224	0.436195
YDL080C	0.400962	0.276729
YDL081C	-0.186757	0.184067
YDL082W	0.597018	1.48263e-06
YDL083C	-0.0741103	0.651759
YDL084W	-0.742664	2.10679e-12
YDL085C-A	-0.854594	0.037693
YDL085W	0.432725	0.641878
YDL086C-A	-1.27167	0.67249
YDL086W	-0.0176897	0.94625
YDL087C	0.653974	0.0823897
YDL088C	-0.181147	0.470282
YDL089W	-0.521721	0.0771867
YDL090C	-0.102352	0.80248
YDL091C	-0.166468	0.638507
YDL092W	0.160562	0.576754
YDL093W	-0.345743	0.178045
YDL095W	-1.39059	6.85339e-21
YDL097C	0.527846	0.00310484
YDL098C	-0.370314	0.506887
YDL099W	0.91121	0.000103203
YDL100C	0.214627	0.150962
YDL101C	0.338869	0.257915
YDL102W	-0.091285	0.674818
YDL103C	0.0521061	0.840693
YDL104C	0.381112	0.510957
YDL105W	-0.16685	0.769728
YDL106C	0.993078	3.54771e-05
YDL107W	0.843025	0.0654689
YDL108W	0.68777	0.0215609
YDL109C	-0.695299	0.364176
YDL110C	0.574141	0.0191513
YDL111C	-0.0942585	0.780027
YDL112W	0.0899858	0.668741
YDL113C	-0.626801	0.0192212
YDL115C	-0.25774	0.495349
YDL116W	0.503315	0.00370918
YDL117W	0.32944	0.104286
YDL119C	0.108528	0.839519
YDL120W	-0.0823393	0.808175
YDL121C	-0.79193	0.00507507
YDL122W	0.217659	0.28178
YDL123W	-0.671663	0.0714265
YDL124W	0.206161	0.302205
YDL125C	-1.24004	8.81164e-16
YDL126C	0.213707	0.117092
YDL127W	-0.130942	0.725031
YDL128W	-0.875525	4.46406e-08
YDL129W	-0.585897	0.384926
YDL130W	1.09851	1.30369e-18
YDL130W-A	0.389348	0.242778
YDL131W	0.0703953	0.734365
YDL132W	0.0523423	0.814302
YDL133C-A	0.974394	3.82767e-11
YDL133W	0.112994	0.728924
YDL134C	-0.479801	0.00237837
YDL135C	0.933568	1.08868e-07
YDL136W	1.0253	2.24458e-21
YDL137W	0.396719	0.00187742
YDL138W	0.696435	0.0765403
YDL139C	0.81873	0.123618
YDL140C	-1.0195	2.04586e-20
YDL141W	-0.00339543	0.992291
YDL142C	-1.13179	0.000225919
YDL143W	-0.864891	4.53336e-09
YDL144C	-1.42787	3.52677e-07
YDL145C	-0.721802	4.87234e-10
YDL146W	-0.21711	0.566334
YDL147W	0.585069	5.60893e-06
YDL148C	1.37497	5.43383e-12
YDL149W	0.649182	0.0296839
YDL150W	1.42566	3.61757e-11
YDL153C	0.867693	4.03114e-06
YDL154W	0.392429	0.752076
YDL155W	0.212162	0.513717
YDL156W	1.03204	0.00727014
YDL157C	0.729348	0.00502949
YDL159W	-0.125176	0.74724
YDL160C	0.473246	1.67235e-05
YDL160C-A	-0.0449485	0.952513
YDL161W	0.366981	0.0908997
YDL164C	-1.17102	5.74083e-06
YDL165W	-0.0074441	0.983991
YDL166C	0.8814	0.000732279
YDL167C	0.415552	0.042958
YDL168W	0.119799	0.519167
YDL169C	0.655004	0.515617
YDL170W	0.0696431	0.816146
YDL171C	-0.623411	7.06374e-09
YDL173W	0.602329	0.0125866
YDL174C	-0.69529	3.45063e-05
YDL175C	0.0911588	0.820559
YDL176W	-0.0456127	0.926074
YDL177C	0.103037	0.887693
YDL178W	1.08292	3.90818e-08
YDL179W	0.162021	0.617727
YDL180W	-1.0713	7.22759e-05
YDL181W	-0.891297	0.0532624
YDL182W	0.131663	0.574454
YDL183C	-0.437613	0.331178
YDL184C	1.04089	1.73036e-14
YDL185W	0.124317	0.256278
YDL187C	-0.45606	0.904964
YDL188C	-0.706379	3.37135e-05
YDL189W	-1.10474	6.35839e-05
YDL190C	-0.662628	2.40754e-05
YDL191W	1.01529	7.07866e-21
YDL192W	1.11909	1.2501e-22
YDL193W	0.402803	0.0462333
YDL194W	0.278431	0.623815
YDL195W	-0.718678	1.44061e-06
YDL197C	-2.44863	0.000114911
YDL198C	-0.538456	0.00196374
YDL199C	-0.288126	0.510139
YDL200C	1.38729	0.00261373
YDL201W	0.0562829	0.853329
YDL202W	0.618337	0.0417666
YDL203C	-0.083198	0.802398
YDL204W	-0.240998	0.489614
YDL205C	-0.329779	0.21348
YDL206W	-0.666928	0.144955
YDL207W	-0.870403	0.00443202
YDL208W	1.35008	8.45543e-20
YDL209C	1.04503	0.00190329
YDL210W	-1.5707	0.0959393
YDL211C	0.129377	0.850723
YDL212W	-0.730895	1.45096e-05
YDL213C	0.814644	0.000975038
YDL214C	1.11989	0.426514
YDL215C	-0.270986	0.229615
YDL216C	0.290583	0.494685
YDL217C	-0.438044	0.150962
YDL218W	0.316773	0.867319
YDL219W	0.479444	0.109923
YDL220C	-0.546403	0.153807
YDL221W	0.893154	0.815634
YDL222C	0.0894258	0.865467
YDL224C	-0.264031	0.199819
YDL225W	0.910441	3.61018e-08
YDL226C	-0.509777	0.000490481
YDL227C	0.268532	0.185517
YDL229W	-0.020057	0.873929
YDL230W	-0.387037	0.258485
YDL231C	-1.46294	0.00451168
YDL232W	1.33053	0.00055498
YDL233W	0.816744	0.000943991
YDL234C	0.194444	0.448864
YDL235C	-1.10132	6.6035e-06
YDL236W	-0.604239	0.00142246
YDL237W	-0.895943	7.78842e-07
YDL238C	0.373487	0.325114
YDL239C	0.621503	0.840574
YDL240W	0.118856	0.689805
YDL241W	-0.302838	0.766328
YDL243C	1.70966	0.379016
YDL244W	0.186629	0.848198
YDL248W	-0.218412	0.30389
YDR001C	-0.064497	0.7241
YDR002W	0.631424	0.000136509
YDR003W-A	1.43536	0.638507
YDR004W	0.215991	0.67779
YDR005C	0.294434	0.294738
YDR006C	0.617436	0.00086813
YDR007W	-0.207295	0.482507
YDR008C	0.14132	0.971839
YDR009W	0.484093	0.735946
YDR011W	-0.144653	0.348314
YDR012W	-0.827227	1.36814e-13
YDR013W	-0.0355552	0.947347
YDR014W	0.277562	0.571635
YDR014W-A	-0.885411	0.659868
YDR016C	-1.5678	7.22759e-05
YDR017C	0.719563	6.2007e-05
YDR018C	-0.37897	0.788512
YDR019C	0.554489	0.00419632
YDR020C	0.129544	0.83894
YDR021W	1.54087	1.60297e-06
YDR022C	-1.29299	0.0506569
YDR023W	0.442602	0.000127993
YDR024W	0.729723	0.846586
YDR025W	1.02977	3.10447e-23
YDR026C	0.524969	0.0886489
YDR027C	-0.050987	0.861595
YDR028C	0.409511	0.0266113
YDR030C	1.45138	0.0129534
YDR031W	0.425004	0.28178
YDR032C	0.0997427	0.560354
YDR033W	-0.0994971	0.522203
YDR034C	-0.618977	0.000975509
YDR034W-B	-0.376908	0.738764
YDR035W	0.168877	0.191979
YDR036C	-0.143072	0.588389
YDR037W	0.0138435	0.923667
YDR038C	0.0019307	0.993636
YDR041W	0.469997	0.0646313
YDR042C	2.0242	0.120338
YDR044W	-0.162968	0.493045
YDR045C	-0.256102	0.480584
YDR046C	0.0655691	0.715047
YDR047W	-0.583702	0.00228849
YDR049W	0.419916	0.0876015
YDR050C	0.581601	9.74123e-10
YDR051C	-0.498268	0.0616372
YDR052C	0.753345	0.000850927
YDR054C	0.501497	0.0241298
YDR055W	0.60951	0.000224109
YDR056C	0.482638	0.0176675
YDR057W	-0.45487	0.107095
YDR058C	1.03673	0.0162724
YDR059C	0.535675	0.159073
YDR060W	0.392813	0.008393
YDR061W	0.523817	0.0314422
YDR062W	-0.53694	0.00025294
YDR063W	0.335415	0.137518
YDR064W	-0.191724	0.109952
YDR065W	-0.533736	0.341812
YDR066C	-1.39794	0.0257288
YDR067C	0.282779	0.483047
YDR068W	0.669504	0.0222744
YDR069C	-0.404608	0.0947135
YDR070C	0.00599209	0.993704
YDR071C	0.670229	0.000154928
YDR072C	-0.610493	0.00260031
YDR073W	0.159501	0.753596
YDR074W	0.426004	0.0311649
YDR075W	0.552725	0.174756
YDR076W	1.38606	0.0257517
YDR077W	0.721984	0.000139462
YDR078C	0.278746	0.792219
YDR079C-A	0.752142	0.198736
YDR079W	-0.0323867	0.947494
YDR080W	0.367971	0.0994817
YDR081C	-0.205209	0.378822
YDR082W	-0.493199	0.596278
YDR083W	0.985908	0.000168342
YDR084C	-0.351489	0.182343
YDR085C	0.926739	0.00683166
YDR086C	0.831745	3.19086e-06
YDR087C	0.0544925	0.867229
YDR088C	0.80351	0.0125333
YDR089W	-0.172682	0.494685
YDR090C	-0.202262	0.613959
YDR091C	0.183135	0.21689
YDR092W	-0.0308095	0.916312
YDR093W	-1.95161	4.50882e-24
YDR096W	-0.429857	0.0552582
YDR097C	-0.155311	0.532815
YDR098C	0.292088	0.0811206
YDR099W	0.0609991	0.713095
YDR100W	0.830895	8.81322e-06
YDR101C	0.296338	0.122534
YDR103W	0.544017	0.00295482
YDR104C	0.370337	0.272024
YDR105C	-0.410297	0.109923
YDR106W	-0.200021	0.911604
YDR107C	-0.265885	0.270573
YDR108W	0.289937	0.320283
YDR109C	0.0928629	0.797666
YDR110W	-0.225383	0.505951
YDR111C	-0.866832	0.00613913
YDR113C	0.52	0.076027
YDR115W	-0.788002	0.036297
YDR116C	0.137805	0.700764
YDR117C	0.872463	3.37518e-05
YDR118W	-0.54535	0.103265
YDR119W	-0.563691	0.000148432
YDR119W-A	-0.0776589	0.935566
YDR120C	0.513831	0.0123615
YDR121W	1.24173	3.40986e-06
YDR122W	0.377738	0.112069
YDR123C	-0.352439	0.501014
YDR124W	-0.11867	0.934816
YDR125C	-0.51041	0.467828
YDR126W	-0.658992	0.246082
YDR127W	-0.586946	7.78842e-07
YDR128W	-0.336401	0.269148
YDR129C	0.200534	0.108753
YDR130C	0.901242	0.0283779
YDR131C	-0.145047	0.791451
YDR132C	0.377677	0.46829
YDR133C	-0.263494	0.677313
YDR135C	-1.34717	4.64657e-24
YDR137W	0.136184	0.670524
YDR138W	0.745124	0.000592575
YDR139C	1.23479	0.000129882
YDR140W	0.937895	0.00593115
YDR141C	-0.584235	0.000349049
YDR142C	-1.1631	0.00834444
YDR143C	0.758998	0.000578143
YDR144C	-1.66217	5.06485e-13
YDR145W	0.647356	0.0029002
YDR146C	0.907499	2.36087e-05
YDR147W	0.107834	0.751081
YDR148C	0.1316	0.437677
YDR150W	-0.33193	0.0073118
YDR151C	-0.563194	0.0282133
YDR152W	-0.0229576	0.947517
YDR153C	0.342595	0.13039
YDR158W	-0.0140949	0.937325
YDR159W	-0.117399	0.70094
YDR160W	-0.268534	0.592194
YDR161W	0.832617	0.0002186
YDR162C	0.490364	0.144535
YDR163W	0.608866	0.125799
YDR164C	-0.550075	0.0482656
YDR165W	-0.404896	0.0556383
YDR166C	-0.114277	0.635937
YDR167W	0.881687	0.000703841
YDR168W	1.03691	1.33256e-10
YDR169C	0.161523	0.559248
YDR170C	-0.519042	0.000127993
YDR171W	0.992871	2.47635e-07
YDR172W	0.0427111	0.782786
YDR173C	0.126624	0.844494
YDR174W	-0.472454	0.0224618
YDR175C	0.145631	0.64643
YDR176W	0.00844045	0.983991
YDR177W	0.0457728	0.83894
YDR178W	0.908766	1.67894e-06
YDR179C	-0.634382	0.410219
YDR179W-A	0.459325	0.37549
YDR180W	-0.901549	0.000619448
YDR181C	1.33391	7.29531e-05
YDR182W	-0.584644	0.00485708
YDR183W	0.624252	0.143545
YDR185C	0.757336	0.141056
YDR186C	-0.443279	0.0210002
YDR188W	-1.0167	1.45267e-14
YDR189W	0.134211	0.554248
YDR190C	0.194127	0.238194
YDR191W	0.653805	0.134202
YDR192C	-0.541099	0.0446456
YDR194C	-0.537479	0.00128889
YDR195W	0.270742	0.35997
YDR196C	0.354365	0.280424
YDR197W	0.600814	0.0835577
YDR198C	-0.00231447	0.996003
YDR200C	-0.811593	0.013279
YDR201W	-0.407709	0.476739
YDR202C	0.217216	0.554248
YDR204W	-0.352275	0.233128
YDR205W	-0.957091	0.000127993
YDR206W	-0.204169	0.417396
YDR207C	-0.51166	0.0486617
YDR208W	-0.156728	0.465211
YDR210W	1.19639	2.07824e-09
YDR211W	0.482279	0.000925128
YDR212W	0.211266	0.136896
YDR213W	-0.244378	0.367515
YDR214W	-0.520162	0.0565417
YDR216W	0.311982	0.197718
YDR217C	-0.548453	0.0868919
YDR219C	0.632116	0.0246653
YDR221W	-0.192902	0.399103
YDR222W	-0.546324	0.0343173
YDR223W	3.6313	0.0334827
YDR224C	1.06298	1.12203e-23
YDR225W	0.661184	9.47075e-08
YDR226W	-0.232872	0.111779
YDR227W	1.17392	3.85226e-09
YDR228C	-0.305636	0.186808
YDR229W	0.90362	0.000163005
YDR231C	-1.25276	5.12055e-05
YDR232W	-1.0387	2.54429e-13
YDR233C	0.650458	3.2973e-09
YDR234W	0.084924	0.710432
YDR235W	0.460382	0.0737851
YDR236C	-0.697615	0.0171513
YDR237W	-0.257721	0.406029
YDR238C	0.26151	0.0350064
YDR239C	1.13222	1.2001e-05
YDR240C	0.474291	0.113035
YDR241W	-2.23689	0.29898
YDR242W	2.89149	0.000644264
YDR243C	0.603881	0.050328
YDR244W	0.795707	0.000289657
YDR245W	-0.957008	2.5959e-06
YDR246W	1.01554	0.00705135
YDR247W	0.26984	0.534253
YDR248C	0.0972768	0.820559
YDR249C	-1.10311	0.0311649
YDR251W	-0.763159	7.5721e-06
YDR252W	1.01626	0.017243
YDR253C	0.54939	0.724527
YDR254W	0.11189	0.839714
YDR255C	0.50005	0.215667
YDR256C	-0.294438	0.844767
YDR257C	0.473984	0.0389891
YDR258C	0.719311	0.000598278
YDR259C	0.435593	0.612957
YDR260C	-0.611233	0.222985
YDR261C	-2.0012	6.40324e-19
YDR262W	0.735399	0.0036507
YDR263C	-1.13417	0.343485
YDR264C	-0.737727	2.4309e-06
YDR265W	0.490288	0.22715
YDR266C	-0.169272	0.379762
YDR267C	0.138983	0.676056
YDR268W	-0.0247696	0.95623
YDR270W	0.691064	0.0138079
YDR272W	0.442919	0.0255316
YDR273W	-0.269796	0.822505
YDR275W	-2.20127	0.000168539
YDR276C	1.075	2.04582e-12
YDR277C	0.527945	0.381502
YDR279W	0.0895324	0.842808
YDR280W	0.372013	0.0786495
YDR282C	0.5145	0.295945
YDR283C	-0.14694	0.498423
YDR284C	-0.838709	0.000154377
YDR285W	0.624192	0.370986
YDR286C	-0.576567	0.333934
YDR287W	0.131666	0.734365
YDR288W	-0.197764	0.665978
YDR289C	0.773423	0.00823171
YDR291W	-0.76437	0.00427019
YDR292C	-0.250577	0.245708
YDR293C	-0.472219	0.0033221
YDR294C	-0.64499	0.000130879
YDR295C	0.507839	0.0649055
YDR296W	-0.463232	0.177938
YDR297W	-0.462854	0.0197322
YDR298C	0.23018	0.204418
YDR299W	1.35086	2.24268e-10
YDR300C	0.085856	0.730032
YDR301W	-0.729086	9.67804e-05
YDR302W	0.444822	0.100387
YDR303C	-0.0538493	0.831924
YDR304C	0.27226	0.057409
YDR305C	1.15969	0.000192407
YDR306C	1.30639	2.10545e-06
YDR307W	-0.292792	0.228834
YDR308C	0.868688	0.00963748
YDR309C	0.415089	0.00488937
YDR310C	0.257835	0.194119
YDR311W	0.17012	0.509853
YDR312W	1.45263	1.61525e-08
YDR313C	-0.0149271	0.98186
YDR314C	1.78303	4.11033e-05
YDR315C	0.337076	0.67064
YDR316W	1.14731	0.00106991
YDR317W	0.816272	0.450573
YDR318W	0.690205	0.159528
YDR319C	-0.498932	0.192248
YDR320C	0.287712	0.185766
YDR320C-A	1.08314	0.0332031
YDR321W	-1.59991	5.73031e-24
YDR322C-A	-0.525098	0.0925148
YDR322W	0.318715	0.266785
YDR323C	1.20046	0.00152271
YDR324C	0.399462	0.0412383
YDR325W	0.111999	0.698478
YDR326C	0.4369	0.00425347
YDR328C	0.574062	0.000563841
YDR329C	0.128154	0.670253
YDR330W	0.137897	0.651401
YDR331W	-0.00182043	0.995898
YDR332W	0.0962711	0.863695
YDR333C	-0.00626503	0.983136
YDR334W	0.911222	9.24719e-05
YDR335W	-0.658044	3.90264e-05
YDR336W	0.637504	0.13872
YDR337W	0.0733462	0.844494
YDR338C	-0.00653038	0.988234
YDR339C	0.920385	0.000250784
YDR341C	0.0404671	0.856036
YDR342C	0.54155	0.317631
YDR343C	0.564344	0.285104
YDR345C	0.963726	1.81718e-16
YDR346C	-0.00210742	0.993704
YDR347W	-1.25049	4.11443e-05
YDR348C	-0.0728379	0.750574
YDR349C	-1.6154	3.25746e-13
YDR350C	0.148885	0.719994
YDR351W	-0.0249915	0.927703
YDR352W	-0.510163	0.051799
YDR353W	-0.272741	0.0724988
YDR354W	-0.0762539	0.718361
YDR356W	1.12177	5.72886e-07
YDR357C	0.311551	0.534253
YDR358W	0.16488	0.54122
YDR359C	-0.185461	0.55726
YDR361C	0.38789	0.0925739
YDR362C	0.288578	0.336602
YDR363W	0.661145	0.0794715
YDR363W-A	0.541641	0.0303569
YDR364C	-0.749692	0.0303089
YDR365C	0.122725	0.56367
YDR366C	2.15833	0.339993
YDR367W	-1.07115	3.24146e-05
YDR368W	0.199494	0.278042
YDR369C	0.112777	0.79948
YDR370C	0.247303	0.522203
YDR371W	-0.286428	0.465211
YDR372C	-0.356948	0.0534944
YDR374W-A	-0.217798	0.766328
YDR375C	-0.902919	0.0090244
YDR376W	-1.05181	0.000179844
YDR377W	-0.292568	0.217759
YDR378C	0.376109	0.118261
YDR379C-A	-0.601589	0.294738
YDR379W	0.448282	0.0683082
YDR380W	0.927772	0.0155252
YDR381C-A	0.559189	0.414911
YDR381W	-0.359639	0.0289861
YDR382W	0.525626	4.92137e-05
YDR383C	0.429129	0.423012
YDR384C	-0.242007	0.227506
YDR385W	-0.398171	0.000175077
YDR386W	0.721076	0.0563196
YDR387C	-1.57857	1.69067e-06
YDR388W	-0.198997	0.23594
YDR389W	-0.113071	0.643776
YDR390C	0.246777	0.263135
YDR391C	-0.475184	0.199911
YDR392W	0.129852	0.763882
YDR393W	-0.278791	0.534253
YDR394W	0.156142	0.448989
YDR395W	-0.0857094	0.586962
YDR397C	-0.350897	0.341584
YDR398W	0.562375	0.00411887
YDR399W	-0.885704	0.00058102
YDR401W	0.844787	0.780475
YDR402C	-0.631834	0.847128
YDR403W	0.00979396	0.993704
YDR404C	-2.08686	1.53391e-16
YDR405W	0.749083	0.0159131
YDR406W	-0.793107	5.99142e-06
YDR407C	-0.770455	4.70214e-05
YDR408C	-1.38935	1.10536e-11
YDR409W	0.704215	0.0098814
YDR410C	-0.90801	0.00649496
YDR411C	-0.046684	0.865107
YDR412W	0.270415	0.4096
YDR414C	-0.874915	0.00823364
YDR415C	0.000988963	0.997869
YDR416W	0.310689	0.246389
YDR418W	0.411078	6.39197e-05
YDR419W	-0.347452	0.301275
YDR420W	0.353415	0.11455
YDR421W	-0.220457	0.589145
YDR422C	-1.21798	3.95174e-09
YDR423C	1.36089	2.92528e-08
YDR424C	0.684428	0.0244778
YDR425W	0.530441	0.0472346
YDR427W	0.24022	0.241271
YDR428C	0.0812134	0.857901
YDR429C	0.995889	5.26027e-14
YDR430C	0.671637	0.000189657
YDR434W	-0.960747	1.13396e-06
YDR435C	-0.728628	0.0311649
YDR436W	-0.700244	0.00663046
YDR438W	-1.37395	0.567604
YDR439W	0.44175	0.338701
YDR440W	-0.662249	0.0904365
YDR441C	-0.467825	0.355659
YDR443C	-0.286616	0.291019
YDR444W	0.207165	0.637307
YDR445C	-0.304854	0.655699
YDR446W	-0.0218921	0.99451
YDR447C	1.02303	7.7213e-23
YDR448W	0.0768375	0.820559
YDR449C	1.05618	1.02341e-07
YDR450W	0.538779	2.24743e-07
YDR451C	0.495238	0.0098855
YDR452W	-0.738272	3.24463e-05
YDR453C	0.365957	0.244998
YDR454C	0.0693782	0.708229
YDR456W	-1.05281	1.7445e-10
YDR457W	0.3414	0.0144316
YDR458C	0.493	0.00932968
YDR459C	-1.56257	0.00148333
YDR460W	0.439901	0.137111
YDR461C-A	1.56069	0.00147619
YDR461W	1.52	0.378828
YDR462W	0.0986226	0.801584
YDR463W	0.94949	2.88202e-10
YDR464W	1.30627	4.39121e-11
YDR465C	-0.27883	0.327715
YDR466W	0.490357	0.050487
YDR468C	-0.133862	0.728895
YDR469W	0.651525	0.0883811
YDR470C	-0.195271	0.494659
YDR471W	0.260496	0.0420889
YDR472W	-1.10319	1.32919e-06
YDR473C	0.979719	0.00366694
YDR475C	0.39528	0.101802
YDR476C	-0.891306	0.00214554
YDR477W	0.298836	0.0959393
YDR478W	1.08396	0.00998472
YDR479C	-1.27462	4.87723e-06
YDR481C	-1.46656	6.92639e-17
YDR482C	-0.768691	0.20135
YDR483W	-1.83303	6.37753e-33
YDR484W	0.383868	0.134821
YDR485C	1.4619	1.29118e-11
YDR486C	0.167081	0.542744
YDR487C	0.151647	0.411849
YDR488C	0.0793279	0.875052
YDR489W	-0.80018	0.0736826
YDR490C	-1.257	6.26672e-06
YDR492W	-0.272885	0.340774
YDR493W	0.548147	0.131826
YDR494W	0.300751	0.242664
YDR495C	1.37044	2.17539e-07
YDR496C	0.79227	2.53478e-06
YDR497C	-1.93005	1.80361e-22
YDR498C	0.821716	0.00196422
YDR499W	0.901855	0.00515753
YDR500C	0.489877	2.11751e-05
YDR501W	-1.09451	0.0220069
YDR502C	-0.901685	2.41882e-08
YDR503C	-1.26873	0.00301243
YDR504C	0.0810477	0.982392
YDR505C	0.5176	0.00133922
YDR506C	-0.434637	0.300463
YDR507C	0.238231	0.169195
YDR508C	0.801384	1.3913e-10
YDR510W	-0.794897	1.68069e-05
YDR511W	0.0190372	0.97008
YDR512C	0.53421	0.0584403
YDR513W	1.03562	5.06485e-13
YDR514C	-0.0402618	0.921628
YDR515W	-0.130395	0.792303
YDR516C	-0.0796168	0.779097
YDR517W	-2.18505	3.5715e-22
YDR518W	-0.97853	3.41105e-07
YDR519W	-0.442837	0.0838481
YDR520C	-0.449477	0.174833
YDR522C	-0.786758	0.815357
YDR523C	4.41364	0.0203143
YDR524C	-0.219037	0.578295
YDR524C-B	1.28725	2.68676e-21
YDR525W-A	-0.554575	0.0926371
YDR527W	0.290244	0.256643
YDR528W	0.57035	0.14614
YDR529C	1.03688	9.08882e-08
YDR530C	-1.51391	1.03478e-07
YDR531W	0.0187169	0.950332
YDR532C	0.325707	0.48107
YDR533C	0.587003	0.000110973
YDR534C	1.884	0.0207432
YDR535C	-3.00715	0.188118
YDR538W	-1.56991	1.2001e-05
YDR539W	0.630522	0.00581647
YDR540C	0.0461546	0.967332
YDR541C	-0.866905	0.0771409
YEL001C	0.51879	0.000416724
YEL002C	-0.89276	1.1465e-09
YEL003W	-0.180464	0.650714
YEL004W	-0.704833	0.0838481
YEL005C	0.310552	0.595207
YEL006W	0.561255	0.0794715
YEL007W	-0.176019	0.330263
YEL009C	5.3137	1.77025e-265
YEL009C-A	-1.14348	0.752573
YEL011W	-1.51327	9.06565e-11
YEL012W	1.01894	0.000472953
YEL013W	-0.555543	0.00014653
YEL015W	0.536485	0.00358548
YEL016C	-1.60564	0.000218938
YEL017C-A	-0.386596	0.0356199
YEL017W	-0.390214	0.0968048
YEL018W	0.0604638	0.910395
YEL020W-A	0.030237	0.950332
YEL022W	-0.0529258	0.805829
YEL023C	4.26166	0.0132791
YEL024W	0.471996	0.0236382
YEL025C	-0.967099	0.000507307
YEL026W	1.38147	3.3084e-34
YEL027W	0.365396	0.000338101
YEL028W	-3.64631	0.102674
YEL029C	-1.33802	1.54135e-05
YEL030W	-1.20051	0.185982
YEL031W	-1.08121	2.93416e-21
YEL032W	-0.776419	1.64474e-06
YEL033W	3.48362	0.157187
YEL034W	0.00978551	0.950603
YEL036C	-1.41434	3.17565e-12
YEL037C	-0.23236	0.274209
YEL038W	-1.08552	4.12981e-05
YEL039C	0.480504	0.459552
YEL040W	-0.00195115	0.993704
YEL041W	1.0491	0.0272405
YEL042W	-1.4421	4.90928e-14
YEL043W	-0.571271	0.0114938
YEL044W	-1.18225	0.000527214
YEL046C	0.562792	3.32153e-06
YEL047C	-0.719979	1.81408e-06
YEL048C	1.4973	3.51095e-05
YEL049W	4.77458	0.00956755
YEL050C	0.852853	0.000396043
YEL051W	0.160337	0.283593
YEL052W	-0.311223	0.215473
YEL053C	-0.901836	0.00224876
YEL054C	0.185678	0.119873
YEL055C	-0.875459	1.71283e-08
YEL056W	0.599173	0.00358777
YEL057C	0.866571	0.668975
YEL058W	-1.36669	9.62349e-19
YEL059C-A	-0.437121	0.59252
YEL060C	1.08729	1.27828e-17
YEL061C	1.04093	9.26173e-06
YEL062W	0.566027	0.0527234
YEL063C	-0.178907	0.257471
YEL064C	0.273639	0.512011
YEL065W	-1.4466	1.17879e-05
YEL066W	-0.474485	0.205607
YEL068C	0.0692688	0.917121
YEL070W	1.33062	0.191821
YEL071W	0.0268874	0.933863
YEL072W	0.358493	0.754041
YEL073C	-0.0987363	0.893838
YER001W	0.0582229	0.777001
YER002W	1.35816	1.61742e-10
YER003C	-0.291756	0.0377276
YER004W	-0.521653	0.0267051
YER005W	-0.724461	0.00606317
YER006W	1.11655	1.42402e-12
YER007C-A	0.661197	0.00323386
YER007W	0.757133	0.0752712
YER008C	0.317998	0.0781288
YER009W	0.0103937	0.956417
YER010C	-1.59013	9.64004e-07
YER011W	0.114423	0.839633
YER012W	1.02729	4.25506e-09
YER013W	1.47181	1.1944e-14
YER014W	0.291257	0.301067
YER015W	-0.398417	0.443646
YER016W	-0.332774	0.274922
YER017C	-0.497643	0.0345385
YER018C	-0.156547	0.762267
YER019C-A	0.0706698	0.796041
YER019W	-0.701076	0.026758
YER020W	-0.143126	0.566334
YER021W	-0.350505	0.0239428
YER022W	0.879265	1.1543e-05
YER023W	-0.626142	0.000327206
YER024W	3.12106	8.02626e-21
YER025W	0.0601944	0.741399
YER026C	0.303877	0.0714265
YER027C	-0.00322174	0.992327
YER028C	0.688483	0.103265
YER029C	0.990437	0.00176679
YER030W	1.03015	0.00031237
YER031C	0.39922	0.0138958
YER032W	0.247637	0.367584
YER033C	-0.732608	0.0153534
YER034W	1.34662	1.00901e-05
YER035W	0.666085	0.00141466
YER036C	-0.161885	0.291618
YER037W	1.65734	1.82868e-15
YER038C	-1.78176	0.00425516
YER038W-A	-0.43961	0.909189
YER039C	2.04322	0.319908
YER040W	0.411029	0.0406992
YER041W	-0.0783757	0.897493
YER042W	0.458767	0.20135
YER043C	0.247677	0.0150836
YER044C	0.465972	0.132469
YER044C-A	-0.185308	0.917124
YER045C	0.211693	0.673181
YER046W	-0.352231	0.654855
YER047C	1.20825	7.21145e-08
YER048C	0.79585	3.02535e-06
YER048W-A	0.869943	7.74663e-05
YER049W	-0.0291438	0.904847
YER050C	0.0571589	0.882861
YER051W	1.00216	0.00562526
YER052C	-0.148039	0.337996
YER053C	0.438564	0.0584126
YER053C-A	1.04268	0.051799
YER054C	-0.406318	0.557372
YER055C	0.890064	1.3276e-10
YER056C	-0.126745	0.532345
YER056C-A	1.48296	1.03994e-49
YER057C	-0.0876484	0.691072
YER058W	0.157595	0.796445
YER059W	0.880315	0.000395759
YER060W	-1.5424	2.67467e-08
YER060W-A	-1.95608	9.75324e-13
YER061C	-0.0409961	0.935727
YER062C	0.691813	4.1432e-05
YER063W	0.231261	0.362169
YER064C	0.75598	4.78561e-06
YER065C	2.4693	8.74805e-09
YER066W	-2.94078	0.000624934
YER067W	0.0636681	0.897877
YER068W	0.311418	0.0781288
YER069W	0.126943	0.605525
YER070W	0.983791	5.71854e-12
YER071C	0.361209	0.447076
YER072W	-0.500979	0.00743559
YER073W	0.577497	2.43829e-05
YER074W	1.15859	2.63361e-22
YER074W-A	1.27885	3.3363e-09
YER075C	0.937371	1.09017e-05
YER076C	-0.638055	0.294788
YER077C	0.989972	0.00157577
YER078C	-0.213627	0.455672
YER079W	0.493947	0.0695172
YER080W	0.614672	2.84166e-05
YER081W	-0.754554	0.00344138
YER082C	1.0626	7.28033e-08
YER083C	-1.13624	7.06266e-09
YER085C	-2.96026	0.338811
YER086W	-0.38112	0.00167707
YER087C-B	0.550583	0.00522389
YER087W	0.0404136	0.924094
YER088C	-2.0567	2.16461e-41
YER088C-A	-0.0639137	0.960701
YER089C	0.00645307	0.979576
YER090W	0.0383828	0.817666
YER091C	-0.274198	0.0210269
YER092W	0.195529	0.571502
YER093C	0.214075	0.508663
YER093C-A	-0.214829	0.769754
YER094C	-1.08448	1.42421e-09
YER095W	-0.483622	0.0332799
YER096W	-1.55032	0.0229174
YER098W	-1.04774	0.0331293
YER099C	0.019735	0.950028
YER100W	0.331829	0.0899368
YER101C	-0.0532728	0.895533
YER102W	0.810332	1.16421e-12
YER103W	-2.21365	1.50848e-21
YER104W	0.420695	0.438
YER105C	-0.0340074	0.86852
YER106W	3.82757	0.0748726
YER107C	-0.9604	9.99581e-06
YER109C	-0.0876936	0.860323
YER110C	-0.715752	8.21086e-09
YER111C	0.215994	0.396162
YER112W	0.358241	0.14173
YER113C	-0.995857	8.81096e-05
YER114C	-0.674351	3.11018e-05
YER115C	-0.392147	0.557078
YER116C	0.51743	0.236281
YER117W	0.360004	0.0151494
YER118C	-0.941377	5.17838e-05
YER119C	-0.877157	0.00143682
YER120W	-0.103581	0.512256
YER121W	0.591698	0.738764
YER122C	-0.494807	0.00104497
YER123W	-0.351308	0.182899
YER124C	0.430919	0.00706704
YER125W	-0.742758	4.18652e-09
YER126C	1.4576	2.0062e-13
YER127W	0.65602	0.00773737
YER128W	-0.042468	0.93431
YER129W	-0.300152	0.282573
YER130C	0.919881	5.80634e-06
YER131W	1.65964	7.25274e-65
YER132C	-0.117656	0.665978
YER133W	-0.238837	0.155493
YER134C	0.317825	0.292995
YER136W	-0.449803	0.000937669
YER137C	0.790581	0.379342
YER138W-A	2.73475	0.282049
YER139C	-0.39771	0.362442
YER140W	-0.60611	0.104466
YER141W	0.231735	0.167418
YER142C	-0.425351	0.544629
YER143W	0.500755	0.0723877
YER144C	-1.25747	2.17337e-05
YER145C	-1.32012	5.06485e-13
YER146W	1.10585	1.51929e-07
YER147C	-0.572648	0.0925148
YER148W	0.46118	0.00465941
YER149C	-0.574323	0.120669
YER150W	0.248434	0.491398
YER151C	0.485994	0.00265398
YER152C	-0.550987	0.0602884
YER154W	0.267287	0.340162
YER155C	-0.0611586	0.725546
YER156C	-0.165637	0.36572
YER157W	0.591576	0.0044996
YER158C	0.0892183	0.842699
YER159C	1.14957	1.7199e-05
YER161C	0.58214	0.0492764
YER162C	1.31245	5.21061e-07
YER163C	-1.37142	3.15459e-05
YER164W	-0.397145	0.0398002
YER165W	-0.883016	1.88299e-14
YER166W	-0.49103	0.000687648
YER167W	0.258341	0.231289
YER168C	-0.895526	1.81024e-05
YER169W	-0.452297	0.10728
YER170W	-0.52466	0.236323
YER171W	-0.0109956	0.97355
YER172C	0.765245	1.46397e-07
YER173W	0.281214	0.56569
YER174C	-4.1673	7.72796e-57
YER175C	0.632447	0.00151171
YER175W-A	2.20392	0.282638
YER176W	-2.52024	3.50783e-38
YER177W	0.240809	0.064226
YER178W	-0.440872	6.33895e-05
YER179W	0.884275	0.458363
YER180C	3.19913	0.116204
YER180C-A	1.19303	0.0925148
YER181C	-0.918359	0.804754
YER182W	0.34714	0.327789
YER183C	0.48305	0.148736
YER184C	-2.13699	1.07072e-05
YER186C	3.69831	0.044231
YER188W	-2.01181	0.0603723
YFL001W	0.0530123	0.899548
YFL002C	-0.316149	0.151999
YFL003C	0.0164466	0.991796
YFL004W	-0.223727	0.217043
YFL005W	0.496463	0.00145256
YFL007W	-0.292287	0.0844966
YFL008W	0.386895	0.0466753
YFL009W	-0.153645	0.453556
YFL010C	0.0567495	0.788512
YFL011W	-2.13212	0.506389
YFL013C	1.23215	1.43109e-12
YFL014W	1.56855	1.37059e-14
YFL016C	0.490304	0.0201857
YFL017C	-0.528388	0.0870672
YFL017W-A	1.09273	0.00040599
YFL018C	0.474416	0.000346562
YFL020C	3.72001	0.0390278
YFL021C-A	-2.63778	0.416222
YFL021W	-0.191059	0.46905
YFL022C	-0.783127	9.7145e-11
YFL023W	1.71278	1.87994e-16
YFL024C	0.422993	0.146223
YFL025C	-1.18893	2.03116e-07
YFL026W	1.14861	0.0119366
YFL027C	0.781912	0.0235357
YFL028C	-0.875771	0.000317363
YFL029C	0.453793	0.194793
YFL030W	0.444616	0.501854
YFL031W	-2.41347	8.89616e-22
YFL033C	-0.272096	0.230748
YFL034C-A	-0.218717	0.285637
YFL034C-B	0.735451	0.0111945
YFL034W	0.111646	0.721826
YFL036W	-0.212043	0.293345
YFL037W	-0.882032	3.11848e-12
YFL038C	0.715405	1.59074e-08
YFL039C	-0.143468	0.199417
YFL041W	-1.46075	8.90256e-15
YFL041W-A	-2.17951	0.467283
YFL042C	0.263248	0.349739
YFL044C	0.038134	0.91853
YFL045C	-1.01122	6.10489e-17
YFL046W	0.551561	0.107095
YFL047W	-0.547203	0.0172505
YFL048C	-0.17685	0.419599
YFL049W	0.14048	0.66899
YFL050C	-4.10636	0.0353103
YFL052W	2.47123	0.143316
YFL053W	0.606901	0.77636
YFL054C	-0.375643	0.51478
YFL055W	-1.7924	0.135079
YFL057C	1.76541	0.423935
YFR001W	1.15821	4.08798e-07
YFR002W	0.928266	1.59083e-07
YFR003C	0.134789	0.657041
YFR004W	1.0213	5.17355e-14
YFR005C	-0.265367	0.38054
YFR006W	-0.353192	0.0577515
YFR007W	0.302424	0.440239
YFR008W	0.741101	0.0781288
YFR009W	0.21415	0.136465
YFR010W	0.559256	0.000388847
YFR011C	0.738832	0.0112862
YFR013W	-0.425877	0.0765403
YFR014C	0.354894	0.232473
YFR015C	0.0301304	0.917124
YFR016C	0.660974	0.0028418
YFR017C	-0.012307	0.985786
YFR018C	-2.55016	3.88852e-07
YFR019W	0.531979	0.00632202
YFR020W	-1.81357	0.00553881
YFR021W	-1.76958	1.69924e-09
YFR022W	-0.0349082	0.943494
YFR023W	2.12486	0.403298
YFR024C-A	-0.190586	0.337996
YFR025C	-1.45791	1.71283e-08
YFR026C	1.04303	0.73527
YFR027W	1.56879	0.00170274
YFR028C	-0.318505	0.195113
YFR029W	-0.0576812	0.888209
YFR030W	-0.00814334	0.976373
YFR031C	0.389828	0.12707
YFR031C-A	1.03897	1.43323e-19
YFR032C-A	-0.0852122	0.605525
YFR033C	-0.656864	0.0718093
YFR034C	0.571405	0.0398098
YFR034W-A	-0.319173	0.844712
YFR037C	0.554676	0.00099093
YFR038W	-0.336836	0.166974
YFR039C	-1.13499	5.94765e-07
YFR040W	-0.577823	0.0202095
YFR041C	-0.682256	0.00736699
YFR042W	-0.528441	0.161511
YFR043C	1.00185	0.0125876
YFR044C	-1.00362	1.0248e-19
YFR045W	-0.715901	0.0707002
YFR046C	0.203958	0.689805
YFR047C	-0.437359	0.0649207
YFR048W	0.831285	0.000809764
YFR049W	1.11682	3.59206e-06
YFR050C	0.518631	0.00171184
YFR051C	0.112912	0.519722
YFR052W	-0.382416	0.0333841
YFR053C	-0.370397	0.156851
YFR055W	-0.403938	0.351202
YGL001C	-0.208093	0.309117
YGL002W	-1.39006	3.37255e-05
YGL003C	-0.586118	0.0867958
YGL004C	0.70087	0.0337691
YGL005C	0.568768	0.105542
YGL006W	-0.318179	0.128869
YGL006W-A	0.613325	0.861508
YGL008C	-0.0126615	0.924914
YGL009C	0.49989	6.72667e-05
YGL010W	0.768389	0.060787
YGL011C	0.90358	3.53677e-06
YGL012W	-1.00785	9.8292e-16
YGL013C	0.523076	0.0182131
YGL014W	-0.481988	0.00178686
YGL016W	-0.0186636	0.941024
YGL017W	0.237413	0.477069
YGL018C	0.519702	0.185766
YGL019W	-0.0675067	0.819797
YGL020C	-0.204445	0.465031
YGL021W	-0.624624	0.00136246
YGL022W	-1.4979	1.49002e-26
YGL023C	-0.507018	0.0512854
YGL025C	-0.123799	0.67777
YGL026C	-0.342919	0.000448108
YGL027C	-1.35971	6.72216e-18
YGL028C	0.785049	1.14819e-12
YGL029W	1.13819	0.00011697
YGL030W	0.620867	2.04103e-09
YGL031C	0.601964	8.78087e-08
YGL032C	0.244475	0.940628
YGL035C	0.721198	4.89499e-05
YGL036W	-0.239614	0.303312
YGL037C	0.141546	0.507789
YGL038C	-0.476271	0.00882795
YGL039W	-0.413943	0.131758
YGL040C	-1.04306	3.39654e-10
YGL041W-A	0.783131	0.0125541
YGL043W	0.285478	0.159269
YGL044C	0.772437	0.000229887
YGL045W	0.341434	0.311721
YGL047W	-0.384211	0.406029
YGL048C	0.861362	6.50247e-09
YGL049C	0.679893	0.000315635
YGL050W	0.516758	0.090067
YGL054C	-0.842146	6.30803e-08
YGL055W	-0.402365	0.0690552
YGL056C	0.514973	0.00692166
YGL057C	-0.167076	0.698478
YGL058W	-0.0590041	0.856509
YGL059W	0.420629	0.164611
YGL060W	-0.128986	0.680038
YGL061C	0.685765	0.0542878
YGL062W	0.0295709	0.912939
YGL063W	-0.0632536	0.946423
YGL064C	0.982432	0.00127084
YGL065C	0.420458	0.102648
YGL066W	0.747325	0.000882495
YGL067W	-1.75463	3.60567e-13
YGL068W	0.350472	0.167884
YGL070C	0.49478	0.0462779
YGL071W	-0.110139	0.72087
YGL072C	-0.504093	0.877515
YGL073W	0.653704	0.0314422
YGL075C	-1.0336	0.0217119
YGL076C	0.120218	0.360405
YGL077C	-0.280683	0.154746
YGL078C	0.574433	0.000721352
YGL079W	-0.576767	0.215001
YGL080W	0.636607	0.00491956
YGL081W	-0.182198	0.835044
YGL082W	0.510194	0.00879035
YGL083W	0.374053	0.17973
YGL084C	-0.924961	4.49439e-05
YGL085W	-0.637248	0.174647
YGL086W	0.21006	0.471322
YGL087C	0.368702	0.15507
YGL088W	0.858411	0.302569
YGL089C	-1.5308	0.00242572
YGL090W	0.419593	0.560331
YGL091C	0.0303809	0.925603
YGL092W	0.393917	0.00362929
YGL093W	0.597251	0.0150209
YGL094C	0.694226	0.00423075
YGL095C	0.752007	0.000824904
YGL096W	1.20088	0.00230367
YGL097W	0.370287	0.0461103
YGL098W	1.02346	0.00115803
YGL099W	0.902203	1.2056e-08
YGL100W	-0.119726	0.624162
YGL101W	0.202112	0.419621
YGL103W	1.01098	2.80873e-19
YGL104C	-1.55283	3.64367e-07
YGL105W	0.628949	7.31974e-05
YGL106W	0.694085	4.88399e-06
YGL107C	-0.902877	0.000100489
YGL108C	1.76681	1.17306e-07
YGL110C	1.41136	3.80946e-10
YGL111W	0.0450323	0.873378
YGL112C	0.184569	0.425367
YGL113W	0.488676	0.370216
YGL114W	-0.921853	2.43405e-06
YGL115W	-0.0474701	0.865629
YGL116W	-0.956924	1.67235e-05
YGL117W	0.382619	0.320283
YGL119W	-0.0903999	0.792262
YGL120C	0.544439	0.000446628
YGL121C	0.645954	0.248274
YGL122C	0.113448	0.624535
YGL123W	-0.0975807	0.47233
YGL124C	0.213026	0.504723
YGL125W	-0.406213	0.00124971
YGL127C	-0.779067	0.0547987
YGL128C	0.141982	0.78196
YGL129C	0.035672	0.910349
YGL130W	-0.255781	0.270573
YGL131C	0.13719	0.748852
YGL133W	1.83816	3.36051e-25
YGL134W	0.13402	0.812791
YGL135W	-0.153253	0.133348
YGL136C	-0.308203	0.552941
YGL137W	0.0653927	0.647724
YGL139W	0.334701	0.115562
YGL140C	-1.55513	2.28913e-18
YGL141W	0.197401	0.401866
YGL142C	-2.42796	2.48661e-22
YGL143C	-0.360513	0.404759
YGL144C	-0.453852	0.26187
YGL145W	0.660871	0.00530708
YGL146C	-1.32385	0.13915
YGL147C	1.05107	3.34063e-20
YGL148W	-0.281124	0.0390278
YGL150C	0.430976	0.00905885
YGL151W	0.241809	0.233818
YGL153W	0.542037	0.0345885
YGL154C	-1.49208	0.00727014
YGL155W	-1.33635	1.4953e-05
YGL156W	0.331087	0.222975
YGL157W	0.0537382	0.85649
YGL158W	1.72849	0.413758
YGL159W	0.274315	0.430567
YGL160W	-0.763158	0.00683682
YGL161C	-0.0456432	0.855957
YGL162W	-0.09974	0.85649
YGL163C	-0.237892	0.464001
YGL164C	0.526022	0.0532855
YGL166W	-0.662296	0.0311592
YGL167C	-1.34862	3.15951e-21
YGL169W	0.142192	0.663938
YGL171W	1.03521	8.14626e-07
YGL172W	-1.36322	7.14257e-11
YGL173C	-0.80114	2.48172e-11
YGL174W	0.444447	0.34492
YGL175C	0.0893384	0.911712
YGL176C	-0.466041	0.388012
YGL178W	-0.298586	0.222615
YGL179C	0.210805	0.701336
YGL180W	-0.414665	0.102126
YGL181W	0.0684548	0.774598
YGL182C	-1.90778	0.501014
YGL184C	0.352817	0.282919
YGL185C	-0.334348	0.348397
YGL186C	-0.10105	0.651603
YGL187C	1.40376	1.32906e-15
YGL189C	1.40506	9.12629e-50
YGL190C	0.00906816	0.977178
YGL191W	0.558708	0.0070726
YGL192W	0.633981	0.85163
YGL193C	0.164858	0.960701
YGL194C	0.0657498	0.840574
YGL194C-A	-0.169995	0.83894
YGL195W	-0.470192	1.70409e-05
YGL196W	-0.10012	0.690785
YGL197W	-0.404512	0.0377276
YGL198W	-1.8734	8.58889e-16
YGL199C	-0.192579	0.961468
YGL200C	-1.12631	5.8347e-14
YGL201C	-0.168338	0.382385
YGL202W	-0.642414	1.94494e-09
YGL203C	-0.774681	0.00042495
YGL204C	-0.131256	0.877173
YGL205W	-0.55066	0.654148
YGL206C	0.0702769	0.616879
YGL207W	-0.221679	0.0679692
YGL208W	0.393379	0.268444
YGL209W	0.622207	0.00395127
YGL210W	0.0115067	0.978365
YGL211W	-0.84553	0.00869692
YGL212W	1.16408	0.000399345
YGL213C	-0.00256289	0.993959
YGL215W	-2.20599	3.92143e-29
YGL216W	0.0375778	0.912939
YGL219C	1.12658	4.72756e-09
YGL220W	-0.90452	0.0040629
YGL221C	0.746101	3.47865e-06
YGL222C	0.48584	0.0396583
YGL223C	-0.065057	0.83894
YGL224C	-0.132371	0.680038
YGL225W	-1.11208	2.66932e-17
YGL226C-A	1.07555	2.91022e-06
YGL226W	-0.0452326	0.95623
YGL227W	0.288061	0.324244
YGL228W	-0.111595	0.554552
YGL229C	-1.27152	0.0154798
YGL230C	-1.25903	0.465031
YGL231C	1.39313	3.81424e-17
YGL232W	0.566861	0.0308134
YGL233W	-0.667862	0.00253542
YGL234W	-1.45929	4.59689e-40
YGL236C	-1.17971	0.00156374
YGL237C	-0.44561	0.172123
YGL238W	-0.252568	0.0722259
YGL240W	-0.537846	0.409237
YGL241W	0.667633	0.00125379
YGL242C	0.560708	0.0218543
YGL243W	-0.706027	0.0962923
YGL244W	1.17502	3.70723e-15
YGL245W	0.698495	1.20458e-12
YGL246C	-0.202422	0.458314
YGL247W	-1.56717	0.00659507
YGL248W	-0.319608	0.255274
YGL250W	-0.17491	0.732346
YGL251C	-0.158447	0.83894
YGL252C	-0.0862409	0.72535
YGL253W	0.231471	0.144436
YGL254W	-1.09159	0.0482656
YGL255W	-0.203969	0.87137
YGL256W	-2.16069	0.0911427
YGL257C	-1.22755	9.61141e-06
YGL258W	-0.590551	0.584672
YGR001C	0.0996486	0.71857
YGR002C	0.213907	0.466886
YGR003W	0.680211	0.00555981
YGR004W	-0.0528424	0.893773
YGR005C	0.83135	0.000124188
YGR006W	0.280861	0.562815
YGR007W	-0.17964	0.5461
YGR008C	0.0890063	0.751081
YGR009C	0.810109	0.000145853
YGR012W	0.28931	0.310044
YGR013W	0.16707	0.579124
YGR014W	-0.151961	0.367917
YGR015C	-0.472302	0.3893
YGR016W	0.852091	0.176788
YGR017W	0.617691	0.0191183
YGR018C	1.97966	0.416333
YGR019W	-0.322336	0.132264
YGR020C	0.287673	0.116244
YGR021W	0.844975	0.0377563
YGR023W	-1.35458	0.000194432
YGR024C	-2.29934	2.72011e-12
YGR026W	0.00250084	0.993254
YGR027C	1.39672	3.3084e-34
YGR028W	-0.721556	0.00776491
YGR029W	0.657785	0.00730598
YGR030C	0.687267	0.132809
YGR031W	0.0973724	0.810078
YGR032W	-1.21241	0.0138498
YGR033C	-0.388086	0.155455
YGR034W	0.258382	0.057409
YGR035C	-6.55577e-06	0.999992
YGR036C	-1.08856	0.00227849
YGR037C	-0.00508457	0.983136
YGR038W	0.163056	0.594753
YGR039W	0.0415187	0.983991
YGR040W	0.122092	0.763882
YGR041W	-0.0962411	0.765615
YGR042W	0.855843	0.061661
YGR043C	-0.603948	0.586863
YGR044C	-0.91802	2.56716e-05
YGR045C	-0.827427	0.802743
YGR046W	0.280958	0.427504
YGR047C	0.340802	0.172547
YGR048W	0.467666	0.0396583
YGR049W	0.59542	0.0766978
YGR050C	-0.747855	0.619159
YGR052W	-0.177957	0.638507
YGR053C	0.65256	0.476711
YGR054W	0.0495512	0.782973
YGR055W	-0.0989797	0.687604
YGR056W	0.33924	0.0773812
YGR057C	0.204532	0.782989
YGR058W	1.16445	1.76066e-05
YGR059W	-2.08891	0.484127
YGR060W	-0.554565	0.00524226
YGR061C	-0.418523	0.000199849
YGR062C	-0.641206	0.266336
YGR063C	0.899256	0.00134453
YGR064W	-1.43056	0.670206
YGR065C	0.687059	0.000712509
YGR067C	-1.17394	0.288459
YGR068C	0.586425	0.0878967
YGR070W	0.824114	0.033113
YGR071C	0.431848	0.143316
YGR072W	0.481039	0.156593
YGR073C	2.08439	0.400989
YGR074W	-0.253589	0.40709
YGR075C	-0.124896	0.842642
YGR076C	0.286056	0.503834
YGR077C	0.285165	0.273533
YGR078C	0.868697	1.85254e-06
YGR079W	-0.323675	0.374519
YGR080W	0.143749	0.548941
YGR081C	1.1492	3.22504e-07
YGR082W	0.0631564	0.792256
YGR083C	1.43266	8.99225e-25
YGR084C	-0.0404596	0.908491
YGR085C	0.410164	0.000399345
YGR086C	0.920329	2.43424e-15
YGR087C	-2.90499	2.60492e-09
YGR088W	-0.0790923	0.820339
YGR089W	0.398725	0.116196
YGR090W	-0.272545	0.063954
YGR091W	0.364999	0.352657
YGR092W	0.671685	0.000130268
YGR093W	-0.483063	0.090067
YGR094W	0.229778	0.0432534
YGR095C	0.0211182	0.966408
YGR096W	-0.551753	0.533013
YGR097W	-0.000986438	0.996819
YGR098C	-0.0569823	0.873338
YGR099W	-0.335589	0.370986
YGR100W	-0.168013	0.480584
YGR101W	-0.574662	0.0296526
YGR102C	0.243919	0.555174
YGR103W	0.549849	0.00374814
YGR104C	0.314695	0.381502
[truncated: 3,442 more rows]
