# Supplementary material for: Yeast eIF2A has a minimal role in translation initiation and uORF-mediated translational control in vivo
Source: eLife. 2024 Jan 24;12:RP92916. doi: 10.7554/eLife.92916 (PMC10945734; doi:10.7554/eLife.92916)
Supplement: Figure 3—source data 2. [file elife-92916-fig3-data2.xlsx]

## Sheet: Sheet1
Gene ID	ΔTE (eIF2AΔ+SM/WT+SM)	ΔTE (eIF2AΔ+SM/eIF2AΔ)	ΔTE (WT+SM/WT)	ΔTE (eIF2AΔ/WT)
YPL032C	-0.725058	-1.56008	-1.12525	-0.258975
YJL076W	-0.839043	-1.45357	-0.649791	-0.0103848
YAL019W	-0.647765	-1.20585	-0.681556	-0.0963262
YDR217C	-1.08288	-1.75238	-0.548453	0.149694
YOL013W-A	-1.33206	-1.64862	0.626849	0.947671
YER122C	-0.630347	-0.964069	-0.494807	-0.132497
YJR004C	-3.01255	-1.39236	-0.295595	-1.90512
YLR399C	-0.882934	-1.33161	-0.416797	0.0623379
YOR243C	-0.899735	-1.04869	-0.325618	-0.147806
YOR188W	-0.798375	-0.371503	0.0526889	-0.345574
YGL049C	-0.880246	-0.361371	0.679893	0.186491
YKR095W	-0.732414	-1.00019	-0.100631	0.194483
YJR047C	-0.87932	-0.485919	0.485912	0.109731
YGL021W	-0.64954	-1.12304	-0.624624	-0.119456
YKL082C	-1.03292	-0.104183	1.21513	0.318005
YDR052C	-1.54572	-0.992281	0.753345	0.230667
YDR389W	-0.656587	-0.721113	-0.113071	-0.0173225
YBR112C	-0.696472	-0.138132	0.70842	0.177941
YDL053C	-0.893639	-0.463941	0.261495	-0.131636
YDR420W	-0.809857	-0.480057	0.353415	0.0536341
YOL006C	-0.596839	0.190323	0.957529	0.197608
YDR145W	-0.792772	0.00758222	0.647356	-0.1234
YNL103W	-0.773418	-0.708074	0.0050537	-0.0297365
YLR330W	-0.762384	-0.242834	0.567123	0.0754147
YOR070C	-0.72806	-1.03478	-0.200846	0.135813
YGR156W	-1.02223	0.454877	1.60878	0.151112
YPL105C	-0.741561	-0.125652	0.619836	0.0334198
YHR164C	-0.898988	-0.603841	0.420513	0.15771
YDR026C	-1.0913	-0.286714	0.524969	-0.246895
YMR198W	-0.984318	0.0318747	0.825657	-0.158198
YKR023W	-0.744203	0.401596	1.25747	0.14325
YFL027C	-1.03931	0.215021	0.781912	-0.445133
