# Supplementary material for: Yeast eIF2A has a minimal role in translation initiation and uORF-mediated translational control in vivo
Source: eLife. 2024 Jan 24;12:RP92916. doi: 10.7554/eLife.92916 (PMC10945734; doi:10.7554/eLife.92916)
Supplement: Figure 3—source data 3. [file elife-92916-fig3-data3.xlsx]

## Sheet: Sheet1
	eIF2AΔ/WT	WT+SM/WT	eIF2AΔ+SM/eIF2AΔ	eIF2AΔ+SM/WT+SM
Gene ID	ΔTE	ΔTE	ΔTE	ΔTE	Gene name
YPL032C	-0.258975	-1.12525	-1.56008	-0.725058	SVL3
YJL076W	-0.0103848	-0.649791	-1.45357	-0.839043	NET1
YAL019W	-0.0963262	-0.681556	-1.20585	-0.647765	FUN30
YDR217C	0.149694	-0.548453	-1.75238	-1.08288	RAD9
YOL013W-A	0.947671	0.626849	-1.64862	-1.33206
YER122C	-0.132497	-0.494807	-0.964069	-0.630347	GLO3
YJR004C	-1.90512	-0.295595	-1.39236	-3.01255	SAG1
YLR399C	0.0623379	-0.416797	-1.33161	-0.882934	BDF1
YOR243C	-0.147806	-0.325618	-1.04869	-0.899735	PUS7
YOR188W	-0.345574	0.0526889	-0.371503	-0.798375	MSB1
YGL049C	0.186491	0.679893	-0.361371	-0.880246	TIF4632
YKR095W	0.194483	-0.100631	-1.00019	-0.732414	MLP1
YJR047C	0.109731	0.485912	-0.485919	-0.87932	ANB1
YGL021W	-0.119456	-0.624624	-1.12304	-0.64954	ALK1
YKL082C	0.318005	1.21513	-0.104183	-1.03292	RRP14
YDR052C	0.230667	0.753345	-0.992281	-1.54572	DBF4
YDR389W	-0.0173225	-0.113071	-0.721113	-0.656587	SAC7
YBR112C	0.177941	0.70842	-0.138132	-0.696472	CYC8
YDL053C	-0.131636	0.261495	-0.463941	-0.893639	PBP4
YDR420W	0.0536341	0.353415	-0.480057	-0.809857	HKR1
YOL006C	0.197608	0.957529	0.190323	-0.596839	TOP1
YDR145W	-0.1234	0.647356	0.00758222	-0.792772	TAF12
YNL103W	-0.0297365	0.0050537	-0.708074	-0.773418	MET4
YLR330W	0.0754147	0.567123	-0.242834	-0.762384	CHS5
YOR070C	0.135813	-0.200846	-1.03478	-0.72806	GYP1
YGR156W	0.151112	1.60878	0.454877	-1.02223	PTI1
YPL105C	0.0334198	0.619836	-0.125652	-0.741561	SYH1
YHR164C	0.15771	0.420513	-0.603841	-0.898988	DNA2
YDR026C	-0.246895	0.524969	-0.286714	-1.0913	NSI1
YMR198W	-0.158198	0.825657	0.0318747	-0.984318	CIK1
YKR023W	0.14325	1.25747	0.401596	-0.744203
YFL027C	-0.445133	0.781912	0.215021	-1.03931	GYP8
