# Supplementary material for: Yeast eIF2A has a minimal role in translation initiation and uORF-mediated translational control in vivo
Source: eLife. 2024 Jan 24;12:RP92916. doi: 10.7554/eLife.92916 (PMC10945734; doi:10.7554/eLife.92916)
Supplement: Figure 3—source data 4. [file elife-92916-fig3-data4.xlsx]

## Sheet: Sheet1
	∆Luciferase activity (WT+SM/WT)				∆Luciferase activity (eIF2AΔ+SM/eIF2AΔ)
Gene name	replicate 1	replicate 2	replicate 3		replicate 1	replicate 2	replicate 3
CHS5	0.694829	0.903299	0.728629		0.61137	0.619072	0.426226
DBF4	0.90603	0.686853	0.597811		0.650126	0.574662	0.321825
DNA2	0.967784	1.50353	0.81044		1.07496	1.04601	0.577606
HKR1	0.565493	0.622548	0.404335		0.324934	0.149376	0.225758
MET4	0.909287	1.20932	0.783476		0.901075	0.943772	0.763586
NET1	0.569056	0.565095	0.534865		0.59146	0.468645	0.389514
NSI1	0.878975	0.94519	0.434418		0.789033	0.80189	0.428782
PBP4	0.991354	1.00781	0.74564		0.876896	1.33258	0.53819
PUS7	1.15064	1.58953	0.705309		1.07462	1.1504	0.773024
RAD9	0.855094	1.23788	0.588749		0.894927	0.444704	0.533151
SAG1	0.645478	0.850523	0.973717		0.191084	0.398497	0.66513
SVL3	0.847285	0.767588	0.456214		0.624214	0.403493	0.532448
