# Supplementary material for: Yeast eIF2A has a minimal role in translation initiation and uORF-mediated translational control in vivo
Source: eLife. 2024 Jan 24;12:RP92916. doi: 10.7554/eLife.92916 (PMC10945734; doi:10.7554/eLife.92916)
Supplement: Figure 6—figure supplement 1—source data 2. [file elife-92916-fig6-figsupp1-data2.xlsx]

## Sheet: Sheet1
uORF_ID	RRO Change (log2FoldChange eIF2A∆ vs WT)	RRO of WT (log2)	RRO of eIF2A∆ (log2)
YML117W.34219	0.22271	-6.33934	-6.11663
YDR334W.1135879	0.504631	-4.906	-4.40137
YOR247W.797592	0.0781186	-7.21355	-7.13543
YMR246W.759626	1.32846	-9.81238	-8.48392
YLR467W.1072193	0.501172	-5.6582	-5.15703
YOR221C.757583	-0.236952	-3.14636	-3.38331
YOR346W.981774	-1.2736	-4.98762	-6.26122
YNL289W.87834	0.0739489	-5.41005	-5.3361
YDR545W.1526006	0.514139	-5.66573	-5.15159
YHR082C.272329	-1.11255	-6.11846	-7.23101
YML056C.164275	0.920077	-8.71136	-7.79128
YHL011C.81639	-0.0264904	-5.26365	-5.29014
YOR303W.882764	0.357752	-3.8747	-3.51695
YGR086C.650667	-0.549829	-7.48429	-8.03412
YHR026W.160742	-1.76499	-7.98342	-9.74841
YBR154C.549047	-0.051969	-5.99132	-6.04329
YBL030C.164117	1.44831	-11.1199	-9.67158
YDR531W.1498214	0.355389	-4.80723	-4.45184
YDL145C.198201	-0.677447	-5.79349	-6.47094
YHR218W.557498	0.524634	-4.12615	-3.60151
YDR293C.1049421	-0.500861	-4.37634	-4.8772
YDR038C.530745	-1.35429	-7.73052	-9.0848
YKL216W.25195	0.0677993	-6.69524	-6.62745
YBL081W.71753	1.23242	-5.74326	-4.51084
YDR034C.512657	0.667689	-6.48253	-5.81484
YCR084C.262516	-1.39076	-7.7607	-9.15146
YML086C.97388	-0.0140908	-3.13513	-3.14922
YJL026W.392380	-0.252033	-4.08831	-4.34034
YKL001C.439464	1.60982	-4.83699	-3.22717
YGL123W.277565	-0.214738	-12.7498	-12.9645
YDR457W.1369769	0.0351177	-6.78065	-6.74553
YIL038C.282669	0.038251	-6.03724	-5.99899
YOR136W.580152	0.28656	-9.66406	-9.3775
YNR016C.661888	1.08474	-12.5504	-11.4657
YGR229C.951118	-0.0447114	-7.33056	-7.37527
YHR114W.338030	-0.914939	-6.31089	-7.22583
YKR091W.611440	1.78087	-5.64929	-3.86842
YCR030C.176457	-0.0101093	-7.66691	-7.67702
YPR036W-A.645906	-0.115039	-2.61787	-2.73291
YNR016C.661615	-2.71543	-11.7436	-14.4591
YMR148W.560277	-0.0222334	-0.874349	-0.896582
YER118C.399092	-0.301568	-4.96588	-5.26745
YER057C.271161	-0.532967	-4.29767	-4.83064
YHR162W.423015	-2.77398	-7.00907	-9.78305
YHR183W.470909	0.713351	-9.89512	-9.18177
YHR053C.212752	-0.764089	-6.2442	-7.00829
YNL090W.456529	0.877037	-3.69046	-2.81342
YPL106C.352300	-0.373506	-7.23215	-7.60565
YDR395W.1263282	0.29875	-6.05813	-5.75938
YIL052C.257106	0.11351	-4.7237	-4.61019
YOR396W.1085158	0.509845	-5.66559	-5.15575
YHR032W.173308	0.290163	-3.81654	-3.52637
YCR024C-A.163131	0.125067	-6.96625	-6.84119
YHR055C.214750	-0.764089	-6.2442	-7.00829
YBL004W.227591	-1.01385	-4.76098	-5.77483
YOR117W.545002	-0.542553	-6.32759	-6.87015
YNL147W.350854	1.16127	-7.51236	-6.35109
YLR034C.211968	0.624503	-5.80316	-5.17865
YML006C.258902	-0.851683	-4.5761	-5.42778
YDR381W.1236540	1.23502	-8.97581	-7.74078
YHR021C.148712	0.595058	-10.5525	-9.95746
YOR261C.816987	-0.537588	-7.10577	-7.64335
YOL036W.256501	-0.115934	-6.01109	-6.12702
YNL037C.559076	0.0634876	-6.58529	-6.5218
YML016C.241562	-0.837129	-4.30442	-5.14155
YMR010W.284952	0.329234	-4.55219	-4.22296
YDL014W.427314	0.762116	-10.6416	-9.87953
YFL039C.54781	-0.058611	-7.15602	-7.21463
YPL190C.187781	-0.317434	-5.59625	-5.91369
YNL156C.342014	1.06996	-6.52291	-5.45295
YGL169W.186021	-0.0133359	-4.35769	-4.37102
YDR206W.862021	-1.44906	-4.72413	-6.17319
YCR036W.193250	-0.393876	-4.90515	-5.29902
YGL097W.321761	-0.699399	-4.54019	-5.23959
YLR006C.164042	0.849064	-5.77801	-4.92895
YBL111C.5333	0.432816	-4.34475	-3.91194
YDR280W.1020714	-0.528778	-5.1653	-5.69408
YLR258W.660689	0.353269	-4.94608	-4.59281
YIL048W.261410	0.0644373	-6.38328	-6.31884
YOL123W.87708	-0.767276	-9.22376	-9.99103
YHR051W.209669	-0.117186	-4.55853	-4.67572
YDR039C.534630	-1.36572	-7.75566	-9.12137
YMR305C.880276	-1.05442	-8.00254	-9.05696
YHR008C.123622	-0.480254	-5.03203	-5.51229
YCR011C.136911	0.140244	-4.93631	-4.79607
YBR253W.723232	1.52227	-5.66958	-4.14731
YIL039W.278385	0.23561	-4.73706	-4.50145
YGR240C.973781	-0.299626	-5.89504	-6.19467
YLR462W.1065660	0.372194	-3.04969	-2.67749
YAL014C.129038	0.0795389	-4.92181	-4.84228
YKL063C.321540	0.322508	-3.52499	-3.20249
YDR073W.592204	-0.545717	-3.20445	-3.75017
YKL183W.98563	0.778149	-5.72466	-4.94651
YPL179W.208128	-0.54322	-4.1411	-4.68432
YPR072W.690083	0.655467	-5.02131	-4.36584
YOR382W.1059481	0.739768	-2.82723	-2.08746
YML058W.159362	-0.133064	-1.81832	-1.95138
