# Supplementary material for: Yeast eIF2A has a minimal role in translation initiation and uORF-mediated translational control in vivo
Source: eLife. 2024 Jan 24;12:RP92916. doi: 10.7554/eLife.92916 (PMC10945734; doi:10.7554/eLife.92916)
Supplement: Figure 6—figure supplement 1—source data 4. [file elife-92916-fig6-figsupp1-data4.xlsx]

## Sheet: Sheet1
uORF_ID	RRO Change (log2FoldChange eIF2A∆ treated with SM vs WT treated with SM )	RRO of WT treated with SM (log2)	RRO of eIF2A∆ treated with SM (log2)
YML117W.34219	1.62462	-6.9544	-5.32978
YDR036C.525010	-1.42661	-5.32754	-6.75415
YOR247W.797592	-0.621401	-4.35967	-4.98107
YOR222W.757881	-0.211016	-4.98812	-5.19913
YLR467W.1072193	0.622493	-7.29677	-6.67428
YOR221C.757583	-0.0398246	-4.08793	-4.12775
YNL289W.87834	-0.863773	-5.45263	-6.3164
YLR286C.710235	0.764347	-9.62228	-8.85794
YDR545W.1526006	0.632885	-7.28968	-6.6568
YDR046C.550629	-1.53395	-8.49661	-10.0306
YDL145C.198287	0.200432	-6.30154	-6.10111
YHR082C.272329	-1.30138	-4.99791	-6.29929
YML056C.164275	0.622374	-3.15965	-2.53727
YOR303W.882764	0.404458	-5.45064	-5.04618
YML068W.137529	2.00076	-5.24	-3.23924
YGR086C.650667	-1.26125	-7.66639	-8.92765
YKL064W.317662	-0.153663	-5.86222	-6.01589
YHR026W.160742	0.685338	-8.24402	-7.55868
YBR154C.549047	-1.13296	-6.19675	-7.32971
YBL030C.164117	-1.02225	-8.04715	-9.0694
YDR531W.1498214	-0.511349	-5.01073	-5.52208
YOL011W.304645	-0.151488	-7.82263	-7.97412
YDR387C.1249900	-0.344782	-3.72468	-4.06946
YOR142W.592878	-0.671338	-6.90691	-7.57825
YDL145C.198201	-0.557896	-6.54463	-7.10253
YHR218W.557498	0.709986	-5.80138	-5.09139
YDR186C.835511	1.32825	-5.29997	-3.97172
YDR293C.1049421	-0.183415	-4.19819	-4.38161
YDR472W.1403212	-3.39029	-3.91103	-7.30132
YKL216W.25195	-0.638188	-7.76012	-8.3983
YBL081W.71753	-1.09209	-4.41465	-5.50674
YDR034C.512657	1.89914	-6.60226	-4.70312
YOR108W.522923	0.551373	-5.61339	-5.06202
YCR084C.262516	0.279869	-5.67761	-5.39774
YPL076W.410390	-0.462004	-1.83947	-2.30147
YML086C.97388	0.167931	-4.10243	-3.9345
YJL026W.392380	0.165128	-5.68474	-5.51961
YKL001C.439464	0.976371	-3.13083	-2.15446
YDR457W.1369769	-1.30157	-5.87625	-7.17782
YIL038C.282669	0.24655	-4.38286	-4.13631
YDR043C.543418	-1.86899	-6.93932	-8.8083
YPR036W-A.645906	0.195083	-2.26287	-2.06779
YKR042W.519399	-1.63945	-11.3815	-13.021
YOR043W.410841	-1.10553	-5.28293	-6.38846
YMR148W.560277	-0.393414	-0.804126	-1.19754
YOR130C.570841	-0.443508	-5.27507	-5.71858
YLR089C.320065	0.836552	-7.46008	-6.62353
YER057C.271161	-0.204657	-3.22976	-3.43442
YHR162W.423015	-0.370252	-9.05415	-9.4244
YML064C.145968	-0.0259337	-6.33685	-6.36278
YER123W.404718	-0.849196	-3.74345	-4.59265
YLR152C.444760	0.518297	-7.29048	-6.77219
YER148W.465207	-1.41106	-6.63105	-8.04211
YHR183W.470909	-0.274167	-9.43355	-9.70772
YHR053C.212752	-0.765778	-4.86776	-5.63354
YNL090W.456529	-0.295401	-2.3227	-2.6181
YPL106C.352300	-0.241133	-8.69152	-8.93265
YDR395W.1263282	-0.5583	-4.70142	-5.25972
YIL052C.257106	0.0871724	-4.03392	-3.94674
YOR396W.1085158	0.644058	-7.29529	-6.65123
YHR032W.173308	-0.625941	-3.23361	-3.85956
YCR024C-A.163131	-0.75897	-4.92461	-5.68358
YDL224C.56477	0.280091	-6.72436	-6.44427
YLR257W.658704	0.814032	-9.11743	-8.3034
YKL019W.402521	0.284346	-4.65071	-4.36637
YBR182C.594890	0.44724	-4.19922	-3.75198
YHR055C.214750	-0.765778	-4.86776	-5.63354
YBL004W.227591	0.587566	-6.14073	-5.55316
YLR034C.211968	-0.622864	-6.30162	-6.92448
YML006C.258902	-1.79299	-3.50026	-5.29325
YBR145W.533697	-0.506237	-6.91445	-7.42069
YOR219C.755067	-0.258823	-5.9298	-6.18863
YHR021C.148712	-1.18014	-11.3171	-12.4972
YOR261C.816987	-0.719531	-5.29095	-6.01048
YDR382W.1239443	-0.896672	-11.8474	-12.7441
YOL125W.83787	0.898812	-5.02542	-4.12661
YNL037C.559076	0.564131	-7.70701	-7.14288
YML016C.241562	-0.0921449	-4.96368	-5.05582
YMR010W.284952	-4.04339	-2.39375	-6.43714
YDR122W.694619	-0.621112	-6.75246	-7.37357
YDR242W.946736	0.595832	-2.62002	-2.02419
YFL039C.54781	-0.214124	-4.48625	-4.70037
YPL190C.187781	0.286634	-5.78944	-5.50281
YNL156C.342014	1.49206	-7.03109	-5.53904
YGL169W.186021	0.955475	-5.81085	-4.85538
YOL117W.96788	0.502537	-3.96978	-3.46724
YCR036W.193250	0.122568	-3.89711	-3.77454
YGL097W.321761	0.000457621	-4.62789	-4.62743
YLR006C.164042	-1.04139	-4.27622	-5.31761
YBL111C.5333	0.656596	-6.15947	-5.50287
YDR280W.1020714	0.651578	-6.74203	-6.09045
YLR258W.660689	-0.194942	-3.7407	-3.93564
YIL048W.261410	0.166602	-7.43359	-7.26699
YDR063W.578447	0.145911	-5.19317	-5.04726
YHR051W.209669	-0.933311	-5.82521	-6.75853
YMR305C.880276	-1.15487	-7.68607	-8.84093
YPL023C.506377	0.0277948	-5.91822	-5.89043
YHR008C.123622	-0.349089	-5.3516	-5.70069
YCR011C.136911	-0.226643	-4.24033	-4.46698
YBR253W.723232	2.14043	-5.66826	-3.52783
YIL039W.278385	0.0393031	-4.08471	-4.04541
YGR240C.973781	-0.00125871	-6.2951	-6.29636
YNL190W.282332	-0.078507	-8.65874	-8.73725
YLR462W.1065660	0.641279	-4.9589	-4.31762
YAL014C.129038	0.0512367	-3.41541	-3.36418
YKL063C.321540	-0.618075	-4.52379	-5.14187
YLR256W.646293	-0.87307	-6.21856	-7.09163
YPR144C.821460	-0.270269	-5.09309	-5.36336
YPL179W.208128	0.0404692	-5.71487	-5.6744
YPR072W.690083	0.284921	-5.80515	-5.52023
YOR382W.1059481	0.687739	-2.62944	-1.9417
YML058W.159362	-0.0799265	-2.80266	-2.88258
