# Supplementary material for: Yeast eIF2A has a minimal role in translation initiation and uORF-mediated translational control in vivo
Source: eLife. 2024 Jan 24;12:RP92916. doi: 10.7554/eLife.92916 (PMC10945734; doi:10.7554/eLife.92916)
Supplement: Figure 6—source data 1. [file elife-92916-fig6-data1.xlsx]

## Sheet: Fig 6Ai
Annotated AUG-uORF mRNAs (N=277)	WT+SM/WT	eIF2AΔ/WT	eIF2AΔ+SM/WT+SM		Annotated NCC-uORF mRNAs (N=1133)	WT+SM/WT	eIF2AΔ/WT	eIF2AΔ+SM/WT+SM
YPL148C	1.08258	0.74036	-1.73778		YDR052C	0.753345	0.230667	-1.54572
YOR180C	2.12056	-2.02096	-1.2406		YKL161C	0.888253	0.512394	-1.35299
YPL034W	2.66687	1.37712	-1.19899		YPL034W	2.66687	1.37712	-1.19899
YGR122C-A	2.87011	0.013789	-1.15121		YCR045W-A	0.524144	-0.217346	-1.05378
YGL158W	1.72849	0.953844	-1.10075		YKR058W	-0.116309	-0.406794	-1.03202
YCR045W-A	0.524144	-0.217346	-1.05378		YGR156W	1.60878	0.151112	-1.02223
YCL029C	-0.846142	-0.028239	-1.01257		YMR198W	0.825657	-0.158198	-0.984318
YEL072W	0.358493	-0.0397957	-1.00917		YDL053C	0.261495	-0.131636	-0.893639
YEL072W	0.358493	-0.0397957	-1.00917		YGL049C	0.679893	0.186491	-0.880246
YML043C	0.718065	-0.735597	-0.962007		YPR185W	-0.586662	-0.194969	-0.844319
YGR024C	-2.29934	-0.227059	-0.906673		YDR159W	-0.117399	-0.0870585	-0.844166
YGR024C	-2.29934	-0.227059	-0.906673		YDR073W	0.159501	-0.0105646	-0.824833
YDR073W	0.159501	-0.0105646	-0.824833		YDR145W	0.647356	-0.1234	-0.792772
YDR073W	0.159501	-0.0105646	-0.824833		YDR515W	-0.130395	-0.247159	-0.774497
YDR123C	-0.352439	0.379552	-0.806303		YNL103W	0.0050537	-0.0297365	-0.773418
YOR188W	0.0526889	-0.345574	-0.798375		YKL005C	-0.07609	0.302961	-0.767343
YMR320W	-0.566867	-0.219679	-0.776584		YDL203C	-0.083198	0.0876973	-0.752293
YKL005C	-0.07609	0.302961	-0.767343		YMR190C	-0.0717203	-0.0247105	-0.744864
YDR357C	0.311551	0.0250783	-0.729274		YDR227W	1.17392	-0.252721	-0.730556
YHR135C	-0.57966	-0.127553	-0.729182		YDR357C	0.311551	0.0250783	-0.729274
YLR263W	4.31109	2.33607	-0.72766		YHR135C	-0.57966	-0.127553	-0.729182
YPL071C	-0.0910291	-0.477492	-0.725465		YPL032C	-1.12525	-0.258975	-0.725058
YLR097C	-0.222213	-0.0143745	-0.72129		YOR198C	-0.320173	-0.0847485	-0.717882
YGL256W	-2.16069	-0.433194	-0.708258		YOR324C	-1.88488	-0.310189	-0.716536
YKL053C-A	0.599521	-0.189889	-0.682827		YDR113C	0.52	0.0294184	-0.69029
YKR069W	1.3465	-0.301062	-0.652729		YLR009W	0.291797	0.131022	-0.686317
YKR069W	1.3465	-0.301062	-0.652729		YKL053C-A	0.599521	-0.189889	-0.682827
YKR069W	1.3465	-0.301062	-0.652729		YMR144W	0.438958	0.403437	-0.681051
YAR008W	-0.396767	-0.119423	-0.642671		YBR057C	-0.300467	-0.0603647	-0.665613
YAR008W	-0.396767	-0.119423	-0.642671		YBR282W	0.505412	-0.0672529	-0.660331
YNL042W	0.417243	0.39301	-0.638432		YKR069W	1.3465	-0.301062	-0.652729
YPL164C	1.20443	0.432084	-0.636015		YKR099W	-0.70599	-0.311716	-0.648325
YNL186W	0.00208029	-0.0438519	-0.577855		YML006C	0.534206	0.0471332	-0.643823
YOL036W	0.65408	0.013628	-0.561771		YAR008W	-0.396767	-0.119423	-0.642671
YJL140W	-0.374203	-0.237721	-0.557596		YGR041W	-0.0962411	-0.225312	-0.641319
YOL018C	0.541565	0.0585224	-0.545231		YBR172C	-0.748666	0.0568992	-0.641167
YDL059C	0.282107	0.237466	-0.54487		YNL042W	0.417243	0.39301	-0.638432
YDL002C	-0.304922	0.116427	-0.516112		YHR149C	-0.702879	0.231356	-0.633641
YJR134C	1.04454	0.300638	-0.49239		YMR165C	0.337554	0.464401	-0.629992
YER115C	-0.392147	-0.527026	-0.479572		YLR079W	-0.0344169	0.140458	-0.624417
YOR342C	0.206071	0.120289	-0.472949		YHR084W	-0.263727	-0.301657	-0.61292
YPL146C	1.35912	0.389702	-0.469747		YEL012W	1.01894	-0.273373	-0.609709
YLR271W	1.09821	0.38218	-0.464922		YJL110C	0.591042	0.121745	-0.599593
YKL098W	0.299566	0.1568	-0.457828		YJL168C	-1.01623	-0.0384761	-0.596934
YHR210C	1.58061	0.535589	-0.451944		YLR337C	0.831028	0.151142	-0.584038
YPL176C	-0.483985	-0.0967285	-0.448842		YER111C	0.215994	-0.0170674	-0.582384
YNL164C	0.093702	0.0804474	-0.447195		YPL181W	0.252592	0.169744	-0.578349
YNL032W	-0.204782	0.0879974	-0.444837		YKL092C	0.31306	-0.0611625	-0.578275
YIL038C	0.43634	0.0700524	-0.428266		YNL186W	0.00208029	-0.0438519	-0.577855
YDL028C	0.743174	-0.0639928	-0.420844		YMR277W	-0.899674	0.00487878	-0.577271
YHR129C	0.339171	-0.229183	-0.409867		YDL235C	-1.10132	-0.231164	-0.576891
YHR129C	0.339171	-0.229183	-0.409867		YDR404C	-2.08686	-0.023447	-0.568115
YOL043C	0.710583	-0.332937	-0.396555		YOL036W	0.65408	0.013628	-0.561771
YOL001W	-0.564887	0.0155778	-0.395662		YJL140W	-0.374203	-0.237721	-0.557596
YOL001W	-0.564887	0.0155778	-0.395662		YGR167W	0.548998	0.0814534	-0.553378
YHR091C	-0.645124	-0.3696	-0.384822		YDR460W	0.439901	-0.169779	-0.544717
YPL072W	-0.0232252	0.538025	-0.382513		YNL197C	-0.207412	-0.224645	-0.54433
YPL072W	-0.0232252	0.538025	-0.382513		YER002W	1.35816	0.190627	-0.544144
YDR308C	0.868688	-0.0288759	-0.373629		YBR059C	-0.554286	-0.0123767	-0.543037
YER167W	0.258341	-0.0623962	-0.370831		YMR016C	-0.278065	-0.0616915	-0.536589
YOR380W	0.97821	0.409524	-0.359758		YJL176C	0.376713	0.270648	-0.528774
YOR193W	1.21343	-0.522687	-0.352776		YLR254C	0.599716	-0.105512	-0.516426
YLR443W	-0.945451	-0.336769	-0.350474		YKL087C	-0.651211	-0.263641	-0.514774
YBR114W	1.09454	0.165199	-0.338305		YAR014C	-1.65524	-0.0946771	-0.512141
YGL071W	-0.110139	-0.190007	-0.336856		YMR080C	-0.530498	-0.165564	-0.507948
YBR242W	-0.30721	-0.252683	-0.333939		YPL190C	0.453859	0.0518774	-0.505957
YBR168W	-0.844688	-0.466928	-0.325176		YMR126C	0.308361	0.461979	-0.502945
YIL002C	0.0602155	0.13174	-0.307417		YPL204W	-0.19494	-0.0119856	-0.493106
YNR012W	-0.000479756	-0.109858	-0.28801		YIL105C	0.734094	0.208457	-0.49148
YGR148C	0.469995	0.015032	-0.271073		YLL021W	0.748025	0.223661	-0.49148
YDR242W	2.89149	0.632491	-0.263934		YIL126W	0.634281	0.30354	-0.491005
YHL010C	0.606073	0.128423	-0.257562		YKL099C	0.391945	-0.0430632	-0.48911
YDL027C	0.449523	0.110952	-0.257073		YGR130C	0.55259	0.0532304	-0.486275
YDL176W	-0.0456127	0.393135	-0.252811		YBR211C	-0.157588	-0.135559	-0.485999
YOL158C	-2.53946	-0.650554	-0.250156		YHR152W	1.13678	0.142504	-0.484225
YGR071C	0.431848	-0.0383353	-0.247685		YOL045W	0.712839	0.0643296	-0.482136
YGL162W	-0.09974	-0.13989	-0.229814		YKR080W	0.418484	-0.27339	-0.481544
YPR085C	0.265649	-0.117076	-0.221304		YPL089C	1.0013	0.26703	-0.481461
YMR026C	-0.793885	0.287419	-0.217543		YER115C	-0.392147	-0.527026	-0.479572
YGR057C	0.204532	0.631174	-0.217192		YOR342C	0.206071	0.120289	-0.472949
YBL057C	-0.029055	0.0431285	-0.210546		YMR005W	1.133	0.192929	-0.471002
YDR206W	-0.204169	-0.257223	-0.197616		YKR062W	0.475977	0.163413	-0.465687
YGL224C	-0.132371	-0.465294	-0.194103		YLR271W	1.09821	0.38218	-0.464922
YDR133C	-0.263494	-0.0261065	-0.191009		YML053C	0.750481	-0.0629071	-0.464117
YOR363C	1.10865	0.0538326	-0.18929		YJL020C	1.10801	0.222004	-0.464043
YNL211C	0.255619	0.563097	-0.187759		YGR108W	-1.07602	-0.277687	-0.462955
YHR114W	0.630836	0.335921	-0.180033		YLR026C	0.357994	0.175807	-0.462682
YNL053W	-0.130713	0.0201442	-0.169633		YFL034W	0.111646	0.0510475	-0.461926
YOL063C	-0.845993	0.103546	-0.157883		YPR137W	0.506429	0.289022	-0.461122
YJL164C	-0.131647	-0.122916	-0.152687		YDR279W	0.0895324	-0.126686	-0.45987
YKL190W	-0.00319904	0.157844	-0.147954		YGL008C	-0.0126615	-0.170744	-0.456702
YOR246C	-1.76913	-0.251399	-0.138675		YNL287W	-0.818765	-0.174368	-0.456439
YGL169W	0.142192	0.134442	-0.130677		YPL256C	-0.437276	-0.0390517	-0.455034
YEL023C	4.26166	-0.374866	-0.130008		YLR223C	1.35057	0.228859	-0.454303
YEL023C	4.26166	-0.374866	-0.130008		YCL014W	-0.660633	0.0576795	-0.453089
YNL238W	-0.829973	0.139069	-0.128151		YNL164C	0.093702	0.0804474	-0.447195
YDR421W	-0.220457	-0.268918	-0.126608		YDL224C	-0.264031	-0.3077	-0.44577
YBR131W	1.17467	0.283967	-0.117866		YNL032W	-0.204782	0.0879974	-0.444837
YDL074C	-0.104816	0.146741	-0.112243		YJL124C	0.473181	-0.254396	-0.442653
YFR048W	0.831285	-0.0435653	-0.110573		YLR262C-A	-0.629551	-0.25131	-0.440961
YOR044W	0.158609	-0.0844847	-0.10017		YNL183C	0.323784	0.0286581	-0.439264
YDR275W	-2.20127	-1.00768	-0.0961596		YPR075C	-1.55067	-0.256403	-0.434206
YLR362W	0.456226	0.0158826	-0.0941316		YDL085C-A	-0.854594	-0.241782	-0.431735
YJL162C	-0.282015	-0.161071	-0.0938193		YKL068W	0.54957	-0.0116643	-0.430143
YLL027W	0.589048	-0.158614	-0.089561		YGR119C	-0.740004	-0.0977079	-0.428565
YGR021W	0.844975	0.378805	-0.0883205		YIL038C	0.43634	0.0700524	-0.428266
YNL095C	-0.315371	-0.0648019	-0.0878744		YER065C	2.4693	-0.307124	-0.428167
YIL059C	2.27815	-1.48405	-0.0809507		YOR194C	0.98564	0.214863	-0.428026
YGL063W	-0.0632536	-0.579635	-0.0750548		YBR235W	-1.62503	-0.276832	-0.42715
YGL191W	0.558708	0.0353259	-0.068209		YDL028C	0.743174	-0.0639928	-0.420844
YMR035W	-0.394034	-0.078153	-0.0650909		YJL127C-B	-0.630318	0.30295	-0.420832
YOR057W	-0.0514803	-0.0635189	-0.0645428		YBR135W	-1.50715	-0.453367	-0.420115
YDR132C	0.377677	0.61567	-0.0525483		YJL041W	-1.24073	-0.0617749	-0.415798
YDR132C	0.377677	0.61567	-0.0525483		YBR276C	-1.55106	-0.426426	-0.414948
YML007W	-0.565742	0.149686	-0.0485852		YNL151C	0.579694	0.431114	-0.412853
YMR097C	1.5303	0.789994	-0.044593		YMR089C	-0.156936	-0.0737788	-0.412242
YOR049C	-0.0154517	0.338789	-0.0436886		YHR115C	-1.54515	-0.18311	-0.41008
YDR350C	0.148885	-0.278254	-0.043422		YKR068C	-0.515011	0.0965081	-0.409877
YGL257C	-1.22755	-0.113705	-0.0390021		YBR049C	0.623203	0.19057	-0.397935
YER050C	0.0571589	0.0778749	-0.0345587		YDR490C	-1.257	-0.108366	-0.397041
YER050C	0.0571589	0.0778749	-0.0345587		YOL001W	-0.564887	0.0155778	-0.395662
YNL156C	0.588817	-0.036047	-0.0344987		YMR212C	-0.148279	-0.0189203	-0.393825
YDR245W	-0.957008	-0.0409912	-0.0288355		YLL010C	-1.40967	-0.077074	-0.389035
YKL064W	-0.151571	0.0931403	-0.0260074		YGL044C	0.772437	0.20179	-0.386715
YDR046C	0.0655691	-0.161484	-0.0218744		YNL233W	1.49441	0.189586	-0.385949
YHR155W	-1.17463	0.332132	-0.0218081		YDR060W	0.392813	0.127481	-0.384991
YNR058W	-0.353122	-1.42057	-0.0143516		YIL005W	-0.59774	-0.0294143	-0.382816
YML023C	-1.2046	-0.479482	-0.00965952		YPL072W	-0.0232252	0.538025	-0.382513
YOR376W-A	-1.00472	-0.545333	-0.0083646		YER159C	1.14957	-0.0959739	-0.379107
YOR376W-A	-1.00472	-0.545333	-0.0083646		YOR320C	-0.641426	-0.223878	-0.377558
YLR360W	-0.0701469	0.131412	-0.00806397		YDR310C	0.257835	-0.0592282	-0.375415
YGR166W	0.234019	0.0301472	-0.00488857		YBR188C	-0.0104782	-0.570835	-0.374779
YFL026W	1.14861	1.22971	-0.00352301		YGR053C	0.65256	-0.472466	-0.373551
YHR159W	0.180219	-0.0197102	-0.00250481		YNL161W	0.570372	-0.0676208	-0.370764
YEL006W	0.561255	0.223986	0.00352878		YLR187W	0.0852189	-0.0223522	-0.36974
YHL002W	1.04273	0.140001	0.00535446		YHR167W	0.44817	1.00788	-0.368213
YPL045W	0.993096	0.138181	0.00824353		YPL141C	0.715369	0.186559	-0.368007
YLR152C	1.56557	-0.646881	0.0091		YLR314C	0.635856	0.382997	-0.367331
YLR152C	1.56557	-0.646881	0.0091		YJL019W	-2.04612	-0.0957504	-0.367223
YGR197C	-0.817465	-0.0925959	0.0155898		YOL123W	0.498184	-0.0592913	-0.366636
YNL066W	0.537818	-0.230271	0.0174936		YBR192W	-0.217578	0.0923478	-0.364312
YML068W	1.49759	-0.5019	0.0181137		YOR131C	0.371653	0.11291	-0.362517
YPR047W	1.04187	0.0777599	0.0219917		YOR023C	-0.693148	-0.250357	-0.360754
YBR028C	-0.160382	-0.359919	0.0226527		YLR206W	-0.972548	-0.201632	-0.358249
YDR099W	0.0609991	0.090433	0.0327344		YGR169C-A	0.824764	0.957103	-0.35645
YGL125W	-0.406213	-0.123953	0.0344436		YDR363W	0.661145	-0.397178	-0.355796
YER041W	-0.0783757	0.0463863	0.0395824		YKL015W	-0.0416541	0.249295	-0.354023
YDR164C	-0.550075	0.117324	0.0435094		YOR261C	0.348916	0.0251764	-0.353655
YPL210C	0.946046	0.0697084	0.0483788		YDL150W	1.42566	0.0409206	-0.35095
YDR248C	0.0972768	-0.0227858	0.0496413		YNL154C	-0.695328	-0.0110072	-0.35067
YDR248C	0.0972768	-0.0227858	0.0496413		YLR443W	-0.945451	-0.336769	-0.350474
YLR241W	-0.805102	-0.201885	0.0529069		YDR514C	-0.0402618	0.1838	-0.349518
YLR021W	0.660182	0.204187	0.0575654		YLR190W	0.203223	-0.385647	-0.348852
YLR333C	1.31589	0.0357951	0.068096		YIL008W	0.871305	-0.234316	-0.347657
YLR333C	1.31589	0.0357951	0.068096		YCL051W	-0.16558	0.0186189	-0.344019
YCR023C	-0.0153233	0.00877374	0.0835615		YBL067C	-0.462686	-0.25311	-0.342486
YDR265W	0.490288	-0.0795796	0.0900751		YNL145W	0.945908	0.742508	-0.340813
YIL014W	-0.582253	-0.0498469	0.0910769		YGL071W	-0.110139	-0.190007	-0.336856
YDR314C	1.78303	-0.129924	0.0931038		YKL063C	0.973405	0.0232147	-0.335278
YPL214C	-0.468087	-0.0340163	0.0961279		YLR387C	0.338508	0.0165126	-0.334412
YDL073W	-1.13129	0.0247055	0.0982172		YBR242W	-0.30721	-0.252683	-0.333939
YPL255W	0.503051	0.199511	0.100581		YBL054W	-0.324512	0.12415	-0.332088
YOL125W	0.154647	0.465127	0.101292		YLR167W	-0.371651	-0.258231	-0.330101
YFL009W	-0.153645	-0.140585	0.112366		YMR183C	0.931561	0.0509733	-0.330051
YMR195W	0.180084	-0.703127	0.113872		YNL091W	0.948623	0.227605	-0.328368
YKL109W	0.255	0.231979	0.119149		YGR245C	0.433619	-0.0947965	-0.327146
YOR136W	0.0280039	-0.12364	0.124163		YMR139W	-0.0401014	-0.0133803	-0.321807
YOR152C	0.042539	0.5027	0.125374		YBR164C	0.948077	0.0931789	-0.321386
YKR003W	-0.396801	-0.261904	0.133527		YER165W	-0.883016	-0.0101542	-0.31897
YDR414C	-0.874915	-0.155817	0.137368		YPL129W	-0.0824904	0.0142206	-0.318519
YBR280C	0.214022	-0.226771	0.139459		YJL167W	-0.650695	0.0589956	-0.317889
YBL020W	-2.35683	-0.0165778	0.143538		YHL020C	0.115272	0.00477935	-0.316367
YGL060W	-0.128986	0.138885	0.144498		YMR031C	0.835164	0.0700403	-0.314866
YDR334W	0.911222	0.313512	0.146436		YMR207C	-0.078149	0.981056	-0.31298
YDL187C	-0.45606	-0.402988	0.152339		YJL165C	1.33428	-0.0549474	-0.311576
YBR274W	-1.07957	-0.191156	0.153672		YLR023C	0.0898749	-0.0396799	-0.311526
YBR270C	-0.647909	-0.781451	0.157364		YIL002C	0.0602155	0.13174	-0.307417
YLR299W	-0.858539	-0.256052	0.161901		YDL014W	0.85218	0.0976454	-0.306524
YBR086C	-1.18733	-0.204177	0.163383		YLR378C	-1.5232	-0.131305	-0.306107
YDR131C	-0.145047	-0.574324	0.163431		YER107C	-0.9604	-0.266301	-0.303994
YEL036C	-1.41434	0.260672	0.163681		YLR025W	0.872554	0.16745	-0.30375
YHR072W	-1.00548	0.202398	0.166679		YMR273C	-1.48757	-0.13903	-0.303265
YJL106W	4.14239	-0.604403	0.16791		YPL254W	-0.386436	-0.377142	-0.303193
YHR039C	-0.25292	-0.0673862	0.172896		YDR213W	-0.244378	-0.208435	-0.302846
YNL239W	-0.385025	-0.119534	0.173814		YPR112C	1.09618	0.0763342	-0.302802
YCR019W	0.0200506	-0.122077	0.180358		YLR276C	0.351289	0.143969	-0.302786
YOL130W	-0.375235	-0.212847	0.181953		YDR208W	-0.156728	0.00042798	-0.301522
YDR160W	-0.268534	-0.512932	0.182596		YML034W	0.543514	0.184513	-0.299354
YJR040W	-0.471858	0.116267	0.18873		YGL207W	-0.221679	0.0501774	-0.298408
YGR095C	0.0211182	0.0353445	0.191163		YLR138W	-0.562674	-0.0615467	-0.298242
YDR124W	-0.11867	0.131016	0.199761		YDR172W	0.0427111	0.0561766	-0.297662
YDR124W	-0.11867	0.131016	0.199761		YDL025C	0.623802	-0.138704	-0.29407
YLR224W	-1.18151	-0.666418	0.201141		YLR430W	-0.685293	-0.186391	-0.293842
YLR242C	-0.434735	-0.0584039	0.201988		YER126C	1.4576	0.0824017	-0.293151
YER046W	-0.352231	-0.827392	0.204206		YMR264W	-1.46362	-0.345459	-0.29065
YER046W	-0.352231	-0.827392	0.204206		YGL029W	1.13819	-0.313976	-0.290181
YGL090W	0.419593	0.186913	0.205373		YER148W	0.46118	-0.137981	-0.289618
YLR413W	-0.32874	-0.0258792	0.210093		YHR030C	0.214393	-0.0895885	-0.286424
YNL125C	-0.153914	-0.325679	0.216714		YBL105C	-1.14555	-0.0981966	-0.28641
YBR043C	0.0560179	0.139034	0.219245		YPL063W	-0.53097	0.123878	-0.285689
YGL087C	0.368702	-0.190645	0.226343		YKL054C	0.556909	0.197756	-0.285636
YBR187W	-0.983896	-0.101227	0.240459		YEL009C	5.3137	-0.330927	-0.285443
YBR259W	0.453793	0.163967	0.240578		YDR372C	-0.356948	-0.138589	-0.284609
YPL133C	-0.367186	-0.317663	0.252204		YGR105W	0.99875	-0.00160589	-0.282736
YPL133C	-0.367186	-0.317663	0.252204		YOR370C	0.180541	-0.0967015	-0.280795
YLR427W	-0.835807	0.118553	0.253658		YER019C-A	0.0706698	-0.118686	-0.278105
YOL033W	-0.297763	0.356756	0.254953		YBR151W	-1.06708	-0.317449	-0.277874
YMR182C	-0.0396091	0.0641316	0.269492		YML035C	0.264377	-0.20927	-0.27776
YGL228W	-0.111595	-0.0230354	0.273073		YNL101W	-0.55639	-0.345702	-0.275708
YPR138C	-1.21575	0.20823	0.273739		YBR158W	-0.548021	0.106463	-0.274407
YJL098W	-0.178201	0.172782	0.291163		YLL013C	0.456177	-0.060651	-0.273026
YER186C	3.69831	-0.0713995	0.303658		YER027C	-0.00322174	0.0856323	-0.268524
YPL057C	-0.090515	0.130673	0.31254		YBL047C	-0.178203	0.0334835	-0.266636
YMR192W	0.442049	0.061832	0.313864		YPR008W	0.99385	-0.0122079	-0.266351
YGL032C	0.244475	-0.507125	0.322424		YLR028C	-0.297653	-0.137053	-0.265426
YDL177C	0.103037	-0.524453	0.325665		YDR242W	2.89149	0.632491	-0.263934
YNL191W	0.146003	0.186126	0.342622		YOR360C	-1.41857	-0.409945	-0.263254
YOR307C	0.493093	-0.158633	0.344611		YNL068C	0.517251	0.118699	-0.261282
YOR307C	0.493093	-0.158633	0.344611		YJL184W	-0.651507	-0.232374	-0.261218
YDR387C	-1.57857	-0.590226	0.36283		YDL145C	-0.721802	-0.201472	-0.257626
YOL105C	-0.331216	-0.894297	0.36443		YDR086C	0.831745	-0.00609857	-0.254177
YHR138C	-0.142058	-0.607332	0.368901		YNL090W	-0.68669	-0.210731	-0.253651
YOR034C	-1.16827	0.0159566	0.370143		YBL103C	0.168604	-0.35143	-0.253445
YOL011W	0.295285	0.151771	0.383611		YNL231C	0.556716	0.0369578	-0.253227
YNL294C	-1.76544	-0.184395	0.384794		YLR006C	-0.221487	0.12564	-0.250016
YPL096C-A	-1.10375	-0.712801	0.387067		YGR218W	-0.0737536	-0.00786947	-0.247847
YML128C	-0.672141	-0.00589182	0.38752		YGR071C	0.431848	-0.0383353	-0.247685
YML128C	-0.672141	-0.00589182	0.38752		YPL157W	-0.370962	0.316962	-0.247182
YFR017C	-0.012307	-0.184378	0.396894		YHL034C	0.859149	0.142175	-0.247139
YDL204W	-0.240998	0.00865279	0.402336		YIL036W	-0.145635	-0.164516	-0.245982
YDL204W	-0.240998	0.00865279	0.402336		YOR043W	0.0382532	-0.176993	-0.245928
YMR267W	0.334801	-0.296654	0.410366		YHR166C	0.0439818	-0.246568	-0.245876
YFR022W	-0.0349082	-0.0592673	0.41169		YBL022C	-0.42695	0.146399	-0.245216
YER066W	-2.94078	0.594	0.430331		YOR091W	1.22135	0.157156	-0.244922
YER066W	-2.94078	0.594	0.430331		YPL243W	-0.0450059	0.0616498	-0.244615
YIL031W	0.287329	0.448444	0.441758		YLR096W	0.306775	-0.0673652	-0.243272
YGR257C	-0.185398	-0.13567	0.44177		YNL085W	-0.316496	0.0234762	-0.242396
YKL100C	-0.416871	0.0322123	0.442797		YNL070W	0.634997	-0.279004	-0.239355
YKL163W	-0.753081	0.00652134	0.446406		YBR083W	0.811622	0.265065	-0.236981
YKL163W	-0.753081	0.00652134	0.446406		YKR096W	0.126665	-0.000755445	-0.236863
YER081W	-0.754554	-0.401639	0.451324		YNL076W	0.555085	0.282776	-0.233033
YER081W	-0.754554	-0.401639	0.451324		YEL039C	0.480504	0.207556	-0.231927
YER081W	-0.754554	-0.401639	0.451324		YER094C	-1.08448	0.0276365	-0.230665
YJL139C	-0.100699	0.0618849	0.456589		YPL117C	-0.549321	-0.0602538	-0.230312
YAR027W	-0.175977	0.0344166	0.467885		YOR216C	1.11471	0.188107	-0.226205
YGR288W	0.370317	-0.1118	0.514645		YCL037C	-0.0249843	-0.145609	-0.225981
YPL076W	0.245095	-0.115284	0.518814		YDL195W	-0.718678	-0.0355842	-0.225233
YBR005W	0.487505	0.152898	0.527896		YDR505C	0.5176	-0.0856716	-0.222254
YPR013C	0.0879464	-0.358003	0.552916		YDL084W	-0.742664	-0.132002	-0.221428
YGR168C	-0.25489	0.237709	0.570909		YOR096W	0.154122	-0.163204	-0.220128
YKR050W	1.50018	-1.47253	0.575997		YKL112W	0.571793	0.240773	-0.218923
YEL016C	-1.60564	-0.237118	0.581674		YOR140W	-0.0462494	0.156463	-0.217843
YEL016C	-1.60564	-0.237118	0.581674		YMR039C	0.201632	0.273574	-0.217485
YDR082W	-0.493199	-0.220032	0.581708		YGR054W	0.0495512	0.465271	-0.215596
YPL149W	-0.0618294	-0.387414	0.591612		YHR004C	0.812479	0.208733	-0.214782
YNL142W	-1.25603	0.175342	0.617191		YDR266C	-0.169272	0.0270793	-0.213984
YPL029W	0.500052	0.0305621	0.622123		YGL018C	0.519702	-0.159164	-0.212081
YOR154W	0.0249539	0.411043	0.622301		YDL141W	-0.00339543	0.116967	-0.210886
YHR209W	-0.474691	-0.59683	0.643356		YNL213C	-0.949525	-0.576461	-0.210299
YMR010W	-2.04209	-0.216586	0.675492		YER123W	-0.351308	0.103547	-0.210071
YMR150C	-1.76819	0.518598	0.702043		YDR006C	0.617436	-0.0474083	-0.210015
YAL034C	1.7113	-0.18163	0.709638		YLR019W	-0.657129	-0.255212	-0.208879
YMR257C	-1.04694	-0.644641	0.740332		YNL243W	-0.680543	-0.0313876	-0.208187
YPR109W	-0.430218	0.0411337	0.775649		YPR166C	0.116439	0.11141	-0.20795
YMR034C	-0.509681	-1.04436	0.794419		YCR027C	0.221072	0.151003	-0.207424
YLR273C	-1.21485	-0.556705	0.892536		YML108W	1.02122	-0.181872	-0.206904
YBR208C	-1.71054	-0.228088	1.00036		YLR345W	0.603082	0.0212642	-0.204793
YBR208C	-1.71054	-0.228088	1.00036		YEL037C	-0.23236	0.00324463	-0.203698
YAR023C	1.72039	3.61066	1.10034		YHR206W	-0.516478	-0.29926	-0.2032
YPL258C	-1.3167	-2.53254	1.13075		YIL118W	0.67921	0.181423	-0.202004
YGL146C	-1.32385	-0.668669	1.22702		YDR352W	-0.510163	-0.176661	-0.201548
YBR298C	1.14224	-0.621639	1.28904		YPL012W	0.00160341	-0.0628604	-0.201258
YLR174W	-2.77465	0.973624	1.75627		YGR229C	0.0943689	0.0264819	-0.201241
YHR071W	-4.82971	-0.555326	1.96958		YOR124C	0.279665	0.121843	-0.199607
YGR289C	-2.50213	0.212377	2.39956		YPR163C	0.256824	0.0242667	-0.198494
YIR031C	-1.61237	0.41615	2.44318		YGL244W	1.17502	0.190288	-0.197833
YOL014W	-1.50068	-2.01686	2.6869		YDR206W	-0.204169	-0.257223	-0.197616
					YGL115W	-0.0474701	-0.0829497	-0.196351
					YNL272C	0.275665	0.127925	-0.195737
					YGL224C	-0.132371	-0.465294	-0.194103
					YDR328C	0.574062	-0.11473	-0.193569
					YOR086C	-0.431437	-0.00125712	-0.192738
					YDR133C	-0.263494	-0.0261065	-0.191009
					YNR032W	-0.428294	-0.00851832	-0.189768
					YIL035C	0.201923	-0.0414374	-0.189459
					YMR224C	0.392537	0.225754	-0.189412
					YIL090W	-1.8844	-0.245794	-0.186128
					YGR034W	0.258382	-0.192861	-0.185938
					YJR045C	0.0429761	-0.0807815	-0.185475
					YDL132W	0.0523423	0.19721	-0.184088
					YDR178W	0.908766	-0.358794	-0.183618
					YOL077C	0.391808	0.101967	-0.180085
					YLR342W	-1.65012	-0.235229	-0.1787
					YBR120C	0.376543	-0.248622	-0.178527
					YPL228W	0.972557	0.23272	-0.178227
					YNL201C	0.374606	0.244539	-0.177304
					YPL162C	-1.53049	0.159415	-0.174326
					YMR295C	0.0644451	-0.089765	-0.174007
					YDL136W	1.0253	0.120008	-0.172822
					YGR210C	-2.45858	-0.156413	-0.172176
					YDR054C	0.501497	-0.115726	-0.171968
					YOR047C	1.13719	-0.151527	-0.170778
					YBR133C	-1.24989	-0.0619826	-0.17056
					YGR244C	-0.239007	-0.291252	-0.170103
					YDL188C	-0.706379	-0.333801	-0.167573
					YLR219W	-0.124268	0.0695365	-0.166419
					YPL019C	-0.41789	-0.112821	-0.165773
					YMR216C	-0.214782	-0.102536	-0.165348
					YDL191W	1.01529	0.111462	-0.163914
					YER048C	0.79585	0.0661992	-0.163611
					YDL004W	0.914386	-0.0865539	-0.163559
					YAL017W	-0.0717783	-0.00944809	-0.162431
					YJL183W	-1.47966	-0.271788	-0.161255
					YPL232W	0.651466	0.0735941	-0.161183
					YDL091C	-0.166468	-0.0860194	-0.160477
					YOR014W	-0.102307	-0.0998212	-0.15988
					YPR124W	-0.300143	-0.103299	-0.158167
					YOL063C	-0.845993	0.103546	-0.157883
					YOR142W	-1.24803	-0.262865	-0.156597
					YER089C	0.00645307	-0.127528	-0.156272
					YPL053C	-0.456151	0.00435265	-0.156246
					YGR267C	-0.337784	-0.0934416	-0.153906
					YGL035C	0.721198	0.273338	-0.153497
					YLR421C	0.373708	-0.183444	-0.152898
					YJL164C	-0.131647	-0.122916	-0.152687
					YGR090W	-0.272545	0.0505486	-0.150262
					YNL020C	0.0546489	-0.0672729	-0.149711
					YGL181W	0.0684548	-0.0413306	-0.149104
					YPL059W	-0.244177	-0.279375	-0.147461
					YLR371W	-0.468868	-0.312207	-0.145186
					YBR212W	-0.151624	-0.257694	-0.144865
					YHR170W	-0.0270022	0.0405143	-0.144818
					YPR073C	0.638987	0.363711	-0.144657
					YPR036W-A	1.46275	-0.319013	-0.144313
					YDR280W	0.372013	-0.0359453	-0.143803
					YOR094W	-0.0710328	0.249868	-0.142678
					YKR076W	0.165599	0.270532	-0.142116
					YNL207W	-0.294836	0.015093	-0.141221
					YMR086W	0.483474	0.241237	-0.140309
					YNL027W	0.389119	0.0184944	-0.139989
					YOR246C	-1.76913	-0.251399	-0.138675
					YNL016W	0.430128	0.040583	-0.137562
					YDR153C	0.342595	0.0992926	-0.137071
					YHR098C	-0.766386	-0.0785492	-0.136385
					YLR450W	-1.15582	-0.349103	-0.135554
					YNR047W	-1.48186	-0.0478922	-0.133814
					YMR108W	0.773047	-0.15541	-0.133375
					YGL030W	0.620867	-0.270764	-0.132833
					YPL031C	-0.237764	-0.193674	-0.132253
					YMR012W	0.120462	0.0826096	-0.132153
					YDR434W	-0.960747	-0.191326	-0.131806
					YFR049W	1.11682	0.192816	-0.130836
					YGL169W	0.142192	0.134442	-0.130677
					YEL023C	4.26166	-0.374866	-0.130008
					YPL050C	-1.20014	-0.267263	-0.128629
					YPL078C	1.00664	-0.0315514	-0.128494
					YMR166C	-0.287236	-0.108174	-0.128349
					YNL238W	-0.829973	0.139069	-0.128151
					YLR257W	0.0710345	-0.0692718	-0.1277
					YDR214W	-0.520162	0.0260676	-0.127644
					YKL117W	0.123973	0.152407	-0.12755
					YNL189W	0.286115	0.00397368	-0.127418
					YJR090C	0.425912	0.192725	-0.126203
					YBR024W	-0.0887981	-0.0702295	-0.124848
					YNL064C	0.45286	0.0267229	-0.123808
					YGR178C	-1.6078	-0.15724	-0.123529
					YNL267W	0.592645	0.086701	-0.120984
					YFL038C	0.715405	0.0852579	-0.119705
					YPR156C	-0.14739	-0.0973886	-0.119629
					YKR079C	-0.728304	0.144374	-0.119385
					YER088C	-2.0567	-0.022557	-0.119068
					YDR293C	-0.472219	0.105335	-0.117716
					YIL069C	1.08344	-0.202491	-0.116744
					YPL184C	-0.73081	-0.233416	-0.115381
					YOR196C	0.225984	0.149125	-0.11495
					YER075C	0.937371	-0.101934	-0.11493
					YML106W	-2.25036	-0.198991	-0.114351
					YOR210W	-0.486446	0.0972479	-0.114224
					YNL024C-A	0.320488	-0.234094	-0.114123
					YDR528W	0.57035	0.182089	-0.114024
					YOR085W	-1.79092	-0.223914	-0.111991
					YER064C	0.75598	0.00553765	-0.111866
					YMR244C-A	-0.0559501	0.24206	-0.110913
					YHR059W	0.33345	0.205892	-0.110819
					YPL037C	0.802974	0.00276397	-0.10981
					YJL005W	-0.316768	0.0227997	-0.108587
					YDL020C	-0.799542	-0.370894	-0.107768
					YFL045C	-1.01122	-0.296821	-0.104377
					YLR228C	-0.872176	-0.175916	-0.104143
					YML001W	0.141903	-0.177398	-0.103627
					YNL256W	0.398103	0.135809	-0.103353
					YHR205W	-0.538514	-0.331434	-0.103064
					YDR045C	-0.256102	-0.365374	-0.101016
					YLR008C	-0.242936	-0.00123078	-0.100373
					YOR044W	0.158609	-0.0844847	-0.10017
					YNL084C	0.473658	-0.0392243	-0.0989056
					YPL145C	-0.503914	-0.0707511	-0.098742
					YGR158C	0.884579	0.00461393	-0.0980228
					YKL002W	-0.175758	0.0908589	-0.0969997
					YNL307C	-2.19231	-0.466336	-0.0966266
					YHR103W	-0.163262	-0.0536783	-0.096375
					YMR234W	0.475496	0.0575566	-0.0957157
					YOR116C	-0.778588	0.0291586	-0.0951671
					YBR078W	0.350704	-0.193815	-0.0947097
					YDL160C	0.473246	-0.148598	-0.0943834
					YBR060C	0.107532	0.175036	-0.0933331
					YDL137W	0.396719	-0.184934	-0.0919836
					YOR117W	0.734029	0.0992987	-0.0918227
					YMR200W	-0.385018	0.0219426	-0.0903326
					YFL004W	-0.223727	-0.126225	-0.0897107
					YLL027W	0.589048	-0.158614	-0.089561
					YOR335C	-0.431493	0.016425	-0.0880311
					YJL085W	0.582232	0.587003	-0.0877266
					YBR154C	0.929934	0.00770818	-0.0870261
					YKL125W	0.489965	0.0589562	-0.0859512
					YOR042W	0.965391	0.126314	-0.0852621
					YKR057W	1.19277	-0.126386	-0.0847066
					YOR054C	0.375128	-0.0401524	-0.0833228
					YDR234W	0.084924	-0.0343446	-0.0827183
					YKL185W	0.199006	-0.222451	-0.0825324
					YBR016W	0.14802	-0.0234952	-0.0819859
					YIL119C	-0.944678	-0.0322242	-0.081429
					YBR194W	0.936024	0.0388196	-0.08115
					YCR084C	0.421463	-0.0819118	-0.0791436
					YCR088W	0.651959	0.126396	-0.0791335
					YJR056C	-0.882515	-0.0685214	-0.0788821
					YOR171C	-0.653339	-0.102317	-0.0788331
					YDR399W	-0.885704	0.0414848	-0.0780827
					YIL131C	-0.0945645	0.0515978	-0.0773782
					YHL027W	0.0960097	-0.0374936	-0.0763418
					YOL012C	-0.0457204	-0.100305	-0.075492
					YDR093W	-1.95161	-0.0431909	-0.0754169
					YJL082W	-0.286534	0.187461	-0.0742264
					YGL123W	-0.0975807	-0.286717	-0.0735352
					YOL109W	1.47572	0.216239	-0.0724043
					YKL126W	-0.605401	-0.0607522	-0.071926
					YDL006W	0.263923	0.0704952	-0.0712937
					YGR235C	0.382753	0.035324	-0.0699513
					YGL133W	1.83816	0.210748	-0.0692713
					YGL191W	0.558708	0.0353259	-0.068209
					YJL003W	-0.311508	0.0759912	-0.0677787
					YBR283C	-1.40484	-0.248492	-0.0670298
					YHR196W	-0.494187	0.066522	-0.0658611
					YKL212W	0.128666	-0.121729	-0.0653288
					YFR050C	0.518631	-0.0606754	-0.0635149
					YHR005C	1.18319	0.239511	-0.0628569
					YPL203W	0.261832	-0.442985	-0.0596199
					YLR203C	-1.70672	-0.271479	-0.0595977
					YDR493W	0.548147	0.180574	-0.0566208
					YCR002C	0.0515631	-0.091097	-0.0557992
					YIL022W	-0.167494	0.272107	-0.0554443
					YIL051C	0.22711	0.0402474	-0.0548704
					YML080W	-0.0677502	0.116022	-0.0543577
					YGL255W	-0.203969	-0.14583	-0.0534162
					YPR053C	0.394953	-0.113712	-0.0531777
					YMR177W	0.405322	0.272926	-0.0524666
					YGL222C	0.48584	0.37564	-0.0523247
					YLR256W	0.509771	0.324027	-0.0503308
					YLR388W	-0.0867395	-0.0410179	-0.0502497
					YLR150W	-0.208545	0.071758	-0.0497689
					YGR173W	0.744487	0.130699	-0.0496231
					YMR122W-A	1.65531	-0.114024	-0.0492006
					YGL003C	-0.586118	0.34361	-0.0486368
					YOR065W	0.843602	0.129395	-0.0480513
					YOR030W	0.598175	-0.123716	-0.0462846
					YGR035C	-6.55577e-06	-0.0284919	-0.045479
					YKR067W	0.0320271	0.1097	-0.0454537
					YMR097C	1.5303	0.789994	-0.044593
					YKL189W	-0.00157504	0.0350889	-0.0437252
					YNL113W	0.654266	0.100404	-0.043232
					YGL009C	0.49989	0.0503451	-0.0427206
					YLR220W	0.117107	-0.0532458	-0.0425875
					YDR468C	-0.133862	0.276795	-0.0422195
					YJL127C	-0.0802757	0.107082	-0.0421071
					YDR111C	-0.866832	-0.224981	-0.0419261
					YML057W	-0.0372119	-0.0530394	-0.0416425
					YDR119W	-0.563691	-0.0527658	-0.041442
					YBR104W	0.683162	-0.0414507	-0.0413155
					YKR016W	1.26051	0.292199	-0.0411124
					YDL135C	0.933568	0.0932325	-0.0404286
					YHR042W	-1.83727	-0.0291036	-0.04035
					YDR063W	0.335415	0.127162	-0.0399638
					YGL257C	-1.22755	-0.113705	-0.0390021
					YIL014C-A	0.307262	-0.193354	-0.0385993
					YJL166W	0.255258	-0.0114255	-0.0383938
					YKR042W	1.17882	0.0842402	-0.0383335
					YBR160W	0.362216	0.0717553	-0.0383213
					YGR193C	0.46014	0.301641	-0.0381447
					YER080W	0.614672	0.174787	-0.0377031
					YNR018W	0.213021	-0.111838	-0.0367919
					YGR253C	0.457952	0.028933	-0.0362475
					YJL047C	0.10047	0.125527	-0.0349726
					YNL156C	0.588817	-0.036047	-0.0344987
					YPR102C	0.291841	-0.101544	-0.0338186
					YBR248C	0.242775	-0.0138154	-0.033346
					YCR057C	-0.638965	0.114401	-0.0332204
					YOR341W	0.115945	0.0737025	-0.0328688
					YML081C-A	0.114493	-0.0178438	-0.0311852
					YGR031W	0.0973724	0.272183	-0.030863
					YPL260W	0.785265	0.0432886	-0.0307663
					YDR071C	0.670229	-0.00524649	-0.0300325
					YOR267C	0.765954	0.258886	-0.0298533
					YGR033C	-0.388086	0.0258139	-0.0297628
					YPL140C	-0.754604	-0.623433	-0.0293688
					YGL161C	-0.0456432	-0.125831	-0.0291007
					YKL106W	-0.0623931	-0.0830891	-0.0262218
					YKL064W	-0.151571	0.0931403	-0.0260074
					YPL106C	0.208349	-0.00941962	-0.0254349
					YKL120W	0.540736	0.0511466	-0.0237139
					YBR200W	0.556057	0.0442938	-0.0234686
					YDR046C	0.0655691	-0.161484	-0.0218744
					YOL113W	1.49325	0.338039	-0.0218513
					YHR155W	-1.17463	0.332132	-0.0218081
					YBL040C	-0.459476	-0.126099	-0.0213729
					YKL176C	-2.74881	-0.348245	-0.0212747
					YLR440C	0.517773	0.0822739	-0.0211664
					YPR097W	-0.209778	0.0437365	-0.0210352
					YNL176C	0.159699	-0.134698	-0.0205964
					YPL090C	0.473329	-0.0200804	-0.0201792
					YPR119W	0.142337	0.129033	-0.0194812
					YLR287C	-0.143464	0.255898	-0.0192745
					YLR186W	-0.903766	-0.209176	-0.0179415
					YDL193W	0.402803	-0.103561	-0.0177907
					YDR477W	0.298836	0.0725692	-0.0151543
					YLR447C	-0.818438	0.0816479	-0.0150228
					YHR143W	0.165697	0.0291593	-0.0147216
					YPL081W	-0.15731	-0.0824457	-0.0141148
					YPL246C	-1.3033	-0.160289	-0.0139204
					YDL117W	0.32944	-0.232287	-0.0133357
					YGR085C	0.410164	-0.0609662	-0.0128827
					YBR125C	-0.697529	-0.140834	-0.0126671
					YNL007C	0.363476	0.0149277	-0.0124931
					YDR232W	-1.0387	-0.148701	-0.0113089
					YER068W	0.311418	0.0394024	-0.0108057
					YMR308C	-0.32691	0.0445219	-0.00964415
					YKL175W	-0.811628	-0.0930333	-0.00918338
					YGL160W	-0.763158	-0.350198	-0.00899199
					YHR172W	0.304049	0.174119	-0.00734034
					YEL042W	-1.4421	-0.15525	-0.00675972
					YER078C	-0.213627	0.126906	-0.00638862
					YNL044W	-0.273965	-0.071327	-0.00544964
					YFR031C-A	1.03897	-0.198726	-0.00525672
					YLR441C	1.39008	0.00426945	-0.00425901
					YOR039W	-0.0491184	-0.103402	-0.00353397
					YML017W	-0.308106	0.201756	-0.00352777
					YKR100C	-0.482185	0.027562	-0.00352571
					YGL116W	-0.956924	-0.130046	-0.00290569
					YFL007W	-0.292287	0.00666399	-0.000433923
					YPL240C	0.268234	0.126889	0.000209046
					YBR221C	0.0278139	-0.224151	0.00023775
					YKR001C	0.663998	-0.00225659	0.00126521
					YPL048W	-0.175216	-0.00997269	0.00173202
					YMR290C	0.220783	0.0625525	0.00184851
					YGR078C	0.868697	-0.0240663	0.00415706
					YFL018C	0.474416	0.176414	0.00462114
					YFL034C-A	-0.218717	0.124593	0.00557312
					YBR103W	0.395529	0.0158244	0.00590237
					YDR319C	-0.498932	-0.170029	0.00643788
					YJR085C	0.0525082	0.0241767	0.00655809
					YER118C	-0.941377	-0.0553039	0.0067572
					YMR070W	1.50536	0.104211	0.00809514
					YOL139C	0.0506101	-0.124862	0.00827339
					YLR152C	1.56557	-0.646881	0.0091
					YDR251W	-0.763159	-0.0285889	0.00937629
					YHR021C	0.588305	-0.26594	0.0108238
					YHR068W	0.246368	-0.0147184	0.0112344
					YGL190C	0.00906816	0.0147756	0.0121629
					YLR449W	1.07232	0.235868	0.0127561
					YDR492W	-0.272885	-0.256757	0.0133601
					YKL140W	0.501473	-0.120414	0.0134288
					YLR407W	-0.0239672	0.134951	0.0140153
					YDL103C	0.0521061	0.166974	0.0146642
					YMR230W	0.85258	0.0402405	0.0146871
					YLR359W	-0.8133	-0.045854	0.0153132
					YNL066W	0.537818	-0.230271	0.0174936
					YDL089W	-0.521721	0.33063	0.0183175
					YJL079C	0.0181835	0.0944707	0.0188886
					YDR384C	-0.242007	0.232304	0.0191104
					YMR309C	-0.00803522	0.215886	0.0200714
					YER133W	-0.238837	0.00538688	0.0203487
					YGL022W	-1.4979	0.0113442	0.0207376
					YLR093C	-0.214837	0.0726171	0.020774
					YMR305C	0.088589	-0.436719	0.022449
					YNL251C	0.0622093	-0.118147	0.0226848
					YOR028C	0.345003	0.00025216	0.0230637
					YGR138C	0.0873997	-0.0179369	0.0231109
					YER012W	1.02729	-0.000877158	0.0238847
					YER130C	0.919881	0.00463802	0.0241108
					YGR281W	-0.825531	-0.0234113	0.0251056
					YPL212C	0.606018	-0.31372	0.0267947
					YJL174W	-0.443412	-0.23192	0.0271033
					YDL110C	0.574141	-0.191329	0.0294804
					YOR209C	-0.126432	-0.0827541	0.0305874
					YNL137C	-0.987593	-0.00603875	0.0311901
					YKR014C	0.529621	0.246756	0.0315268
					YKL009W	0.866076	0.296073	0.0319266
					YOR107W	0.132134	-0.453583	0.0330077
					YML056C	-2.2035	-0.0728554	0.033141
					YKL104C	0.0986452	0.00965828	0.0333724
					YER100W	0.331829	0.119403	0.0339897
					YNL021W	0.202255	0.0867468	0.034116
					YPR107C	1.26218	0.194922	0.034358
					YGL125W	-0.406213	-0.123953	0.0344436
					YDL155W	0.212162	0.302035	0.0351631
					YJR116W	0.874378	0.0829875	0.0352029
					YMR145C	0.656706	-0.0576938	0.0365081
					YJR007W	0.761795	0.0788114	0.0375602
					YGR240C	0.120019	-0.14234	0.0375658
					YOL028C	-0.190336	-0.310386	0.037703
					YOR262W	-1.18707	-0.000310093	0.0379652
					YDR395W	-0.0857094	0.0323656	0.0390178
					YKL184W	-0.41987	-0.311108	0.0391545
					YMR281W	-0.656797	-0.245328	0.0392955
					YKR002W	-0.820121	-0.136709	0.0394106
					YER041W	-0.0783757	0.0463863	0.0395824
					YJL042W	-0.0624385	0.0605673	0.0411725
					YHR089C	0.261099	0.120607	0.0415175
					YLR047C	-0.532167	-0.623154	0.0419814
					YOL013C	-0.526798	-0.249023	0.0420828
					YMR261C	-0.544158	-0.198753	0.0430012
					YDL134C	-0.479801	-0.201741	0.0436391
					YHR195W	0.386664	0.278617	0.0442206
					YGR191W	-0.543744	-0.124716	0.0445079
					YMR246W	-0.710417	-0.0279155	0.0446855
					YCR030C	0.35974	-0.0536333	0.0449482
					YPR028W	-0.0689124	0.00437667	0.046186
					YGL202W	-0.642414	-0.180996	0.0463075
					YLR034C	-0.0138184	-0.172314	0.0472043
					YOR052C	-0.105788	-0.0545509	0.0496866
					YMR241W	-1.57095	0.00239055	0.0508944
					YLR268W	0.426443	-0.350691	0.0515929
					YOR173W	-0.012406	0.476058	0.0533711
					YJR059W	-0.511102	-0.0166325	0.0552629
					YPL183W-A	0.0674921	0.144367	0.0556078
					YMR189W	-0.189508	-0.141161	0.0558535
					YAR015W	0.381228	0.210572	0.0560253
					YDR452W	-0.738272	-0.0720133	0.0561157
					YMR171C	-0.761642	0.0804688	0.0565317
					YJL129C	-0.690167	-0.15216	0.0565517
					YHL003C	-0.976064	-0.0820522	0.0566082
					YML072C	-0.620381	-0.0811736	0.057734
					YPR024W	0.0576965	0.0256457	0.0583606
					YDR348C	-0.0728379	0.122099	0.0586299
					YIL116W	0.862031	-0.315584	0.0589452
					YFL005W	0.496463	0.176821	0.0604225
					YBR127C	0.164067	-0.00757279	0.0608793
					YDL122W	0.217659	0.16279	0.0615232
					YNR034W	-0.14806	0.085127	0.0627233
					YHR097C	1.198	0.0676862	0.0632316
					YOR156C	0.690567	-0.114941	0.063448
					YOR157C	0.780353	0.16426	0.0639252
					YEL032W	-0.776419	-0.00867193	0.0658867
					YOL040C	0.412431	-0.124542	0.0659142
					YHR099W	-0.0782815	0.180823	0.0670503
					YOR232W	1.05813	0.0610427	0.0674312
					YPL135W	0.830344	-0.398387	0.0674702
					YLR260W	1.25867	0.18279	0.0675471
					YOR228C	-0.778261	-0.188458	0.0678429
					YLR333C	1.31589	0.0357951	0.068096
					YML058W	0.0941202	-0.0201677	0.0686959
					YLR354C	-1.05178	0.000524442	0.0701058
					YBR122C	-0.0298586	0.103162	0.0708619
					YML086C	-0.00899771	0.0418857	0.0724261
					YDL111C	-0.0942585	0.0589564	0.0726107
					YML046W	-0.408661	0.0488689	0.0732832
					YPL270W	-0.523775	0.113079	0.0734856
					YBL050W	-0.885713	-0.193605	0.0749196
					YGR241C	-0.358219	0.0129114	0.0752416
					YIL117C	0.208555	-0.105611	0.0757086
					YGR134W	-0.31381	-0.438831	0.0762052
					YLR454W	-0.144504	-0.0581651	0.0765587
					YPR016C	0.379969	0.0728645	0.0768311
					YMR092C	0.0867657	0.0519726	0.0770244
					YKL192C	0.617578	-0.0120737	0.0788979
					YOR247W	0.998285	-0.410035	0.0790847
					YPR010C	0.0346693	0.0550102	0.0796185
					YDR033W	-0.0994971	-0.239945	0.0806756
					YNL094W	-0.773957	0.0719755	0.0811069
					YBR201W	0.453359	-0.184244	0.0818166
					YBR017C	-0.206086	0.0990606	0.0840301
					YDR211W	0.482279	0.221484	0.0848882
					YDR144C	-1.66217	-0.0443129	0.0855009
					YLR179C	-0.93636	-0.141642	0.0869148
					YKL181W	-1.24832	-0.110768	0.0869585
					YJR101W	-0.299329	0.00619701	0.087022
					YLR291C	-0.744772	-0.158786	0.0875404
					YOR346W	-0.0193241	0.0955256	0.0893772
					YHR007C	-0.49693	-0.151118	0.0896758
					YIL014W	-0.582253	-0.0498469	0.0910769
					YDR346C	-0.00210742	-0.0452744	0.091571
					YOR299W	-0.00779842	-0.0509841	0.092499
					YPR149W	0.794466	-0.199915	0.0926098
					YPL214C	-0.468087	-0.0340163	0.0961279
					YDR171W	0.992871	0.184278	0.0962356
					YOL136C	0.27763	-0.14869	0.0966096
					YOL111C	0.446723	0.0278559	0.0970994
					YDL073W	-1.13129	0.0247055	0.0982172
					YLR286C	-0.0631669	0.0305354	0.0987562
					YNR051C	0.462171	0.225623	0.101214
					YEL026W	1.38147	-0.197076	0.102099
					YAL040C	-1.94028	-0.0183068	0.102724
					YDR284C	-0.838709	-0.218572	0.104302
					YOR101W	-0.40809	0.201266	0.105139
					YLR208W	-0.0453351	-0.132008	0.107533
					YGL040C	-1.04306	-0.105849	0.108983
					YHL011C	-1.03418	-0.140776	0.111319
					YLR277C	0.648141	0.155144	0.111666
					YDL146W	-0.21711	0.0296906	0.112165
					YFL009W	-0.153645	-0.140585	0.112366
					YDR359C	-0.185461	0.149057	0.112551
					YMR217W	-0.944264	-0.11814	0.113003
					YBL099W	0.516351	-0.19011	0.113267
					YLR372W	-0.556127	-0.126108	0.115061
					YGR195W	0.379054	0.126271	0.11579
					YJL133W	0.0338849	0.127977	0.116298
					YLR332W	0.19833	-0.128783	0.116336
					YER056C	-0.126745	-0.153011	0.116551
					YGL028C	0.785049	0.00403793	0.117379
					YLR083C	-1.47106	-0.309817	0.117694
					YDR430C	0.671637	0.28229	0.119314
					YJR109C	0.30864	-0.399769	0.120301
					YPL159C	-0.420879	-0.184311	0.120701
					YNL220W	-0.216348	-0.0441921	0.121139
					YDL171C	-0.623411	0.0403495	0.121492
					YOL056W	0.404419	0.0226253	0.122174
					YBR029C	-1.14511	-0.0694125	0.122375
					YMR237W	-0.34557	-0.0535147	0.122666
					YIL093C	-0.175357	-0.0278318	0.123099
					YNR017W	-0.214092	-0.09591	0.124032
					YOR136W	0.0280039	-0.12364	0.124163
					YOR128C	0.542562	-0.00912802	0.124729
					YOR152C	0.042539	0.5027	0.125374
					YGR209C	1.10986	-0.230928	0.125479
					YGR183C	0.905379	-0.05358	0.126493
					YPL179W	1.23224	0.218673	0.128649
					YLR110C	-0.0185584	-0.17559	0.128829
					YEL027W	0.365396	-0.10904	0.129075
					YIL048W	0.00523504	-0.102069	0.130267
					YCL030C	0.1941	-0.217621	0.130802
					YBR054W	0.550717	-0.209131	0.131771
					YPL273W	0.607535	-0.14624	0.133019
					YKR003W	-0.396801	-0.261904	0.133527
					YDR298C	0.23018	-0.26028	0.134287
					YNL216W	-0.00356071	0.0498033	0.134783
					YPR181C	-1.14701	-0.0179751	0.135131
					YDR142C	-1.1631	-0.0244097	0.135165
					YPR160W	0.0509824	0.0337415	0.135824
					YMR300C	0.208555	0.220454	0.137261
					YAL036C	-0.0956895	-0.00804922	0.137853
					YGR255C	-0.28967	0.0234194	0.13789
					YMR223W	-0.0584517	0.354056	0.137954
					YOR279C	0.481605	-0.248781	0.138475
					YGL056C	0.514973	0.336172	0.138551
					YDR354W	-0.0762539	-0.35668	0.138899
					YOR226C	0.498635	-0.0794969	0.142231
					YKL142W	-0.327736	0.0369274	0.142496
					YGR038W	0.163056	-0.385252	0.142779
					YJL039C	-0.223428	0.022403	0.144062
					YLR040C	-0.693745	-0.354395	0.14447
					YGL060W	-0.128986	0.138885	0.144498
					YPR020W	0.744083	-0.197687	0.144539
					YNL288W	0.00317857	-0.106899	0.145241
					YHR009C	-0.220352	-0.0899778	0.145473
					YKL041W	0.649447	-0.0259666	0.147524
					YAL016W	-0.172489	0.00450824	0.148623
					YNL065W	0.142643	0.0283449	0.148734
					YNL289W	0.690961	0.235387	0.150188
					YLR300W	-0.274346	-0.0548277	0.150732
					YDR303C	-0.0538493	-0.174957	0.152122
					YBR109C	0.138795	-0.00656106	0.15235
					YMR176W	-1.76268	-0.249164	0.152795
					YPL125W	-0.152945	0.100835	0.155733
					YJR099W	0.468964	0.275654	0.157255
					YOR316C	-1.63452	-0.193534	0.158474
					YDR224C	1.06298	-0.0807009	0.159404
					YLR248W	0.155386	-0.0273403	0.159521
					YLL029W	0.228467	0.189695	0.159583
					YPR159W	-1.49211	-0.194776	0.160655
					YBL041W	0.429289	0.0328483	0.16091
					YLL024C	0.247866	-0.0160968	0.160912
					YLR099C	-0.949693	-0.58813	0.161658
					YLR299W	-0.858539	-0.256052	0.161901
					YNL268W	0.972926	0.0381654	0.162833
					YNL037C	0.0126894	-0.129837	0.163297
					YBR086C	-1.18733	-0.204177	0.163383
					YEL036C	-1.41434	0.260672	0.163681
					YOR221C	0.0721772	-0.234934	0.165356
					YOR087W	-0.199436	-0.0915349	0.166381
					YMR125W	0.902746	0.207348	0.16665
					YLR199C	0.611015	0.105562	0.167855
					YGR007W	-0.17964	0.149712	0.167878
					YER169W	-0.452297	-0.31189	0.168809
					YHR086W	-1.19238	-0.349568	0.169054
					YPL023C	-1.27901	0.0579985	0.169215
					YDR524C-B	1.28725	-0.331312	0.169755
					YER020W	-0.143126	0.190179	0.169799
					YDL015C	-0.215494	-0.246225	0.169999
					YDR295C	0.507839	-0.0688551	0.171425
					YBR132C	-0.610435	-0.295858	0.171579
					YJL001W	0.393063	-0.143639	0.171583
					YBR162C	-0.398025	-0.0812574	0.172492
					YDR091C	0.183135	0.000117064	0.173212
					YPL274W	0.142612	-0.00222677	0.17337
					YPR125W	0.423574	-0.309442	0.17416
					YDR397C	-0.350897	-0.340163	0.174371
					YBR082C	0.499351	0.00449214	0.175237
					YGL039W	-0.413943	-0.349613	0.17534
					YLR113W	-1.14552	0.127922	0.176053
					YDR377W	-0.292568	-0.193255	0.176331
					YPR145W	0.903095	0.0509983	0.177644
					YOR272W	0.200502	0.240099	0.177958
					YMR243C	-1.84431	-0.0804095	0.178935
					YML070W	-0.0584294	-0.0257432	0.179638
					YKL171W	-0.0752987	0.181537	0.179766
					YOL130W	-0.375235	-0.212847	0.181953
					YDR074W	0.426004	0.280067	0.182605
					YCR008W	-0.53927	-0.261516	0.182733
					YAL026C	-0.25567	-0.0230906	0.184865
					YPR118W	0.0186707	-0.0865337	0.185332
					YEL034W	0.00978551	-0.0203073	0.185416
					YHR104W	-0.554787	-0.129537	0.188456
					YEL050C	0.852853	-0.187736	0.18919
					YOR089C	-0.0788219	0.306754	0.189194
					YAL005C	0.206899	0.0288514	0.18931
					YML038C	-0.82874	-0.257076	0.18932
					YGR095C	0.0211182	0.0353445	0.191163
					YGR036C	-1.08856	-0.301571	0.191349
					YLR250W	-0.129219	-0.16656	0.19137
					YKL056C	0.758771	-0.0612849	0.192736
					YJR104C	0.251259	-0.179512	0.193135
					YGL196W	-0.10012	-0.146407	0.194447
					YDR077W	0.721984	0.0877616	0.195391
					YOR283W	0.503326	0.0906176	0.195596
					YKR026C	0.640991	0.162498	0.195915
					YCR053W	-0.365306	-0.064421	0.196119
					YPR035W	0.87502	0.284607	0.196882
					YDR151C	-0.563194	0.0463832	0.199253
					YNL036W	1.34745	0.560351	0.199326
					YGR020C	0.287673	-0.0550635	0.199537
					YMR027W	0.693699	0.0905572	0.200126
					YLR224W	-1.18151	-0.666418	0.201141
					YKR051W	-1.73404	-1.08632	0.201885
					YHR092C	0.628437	-0.0130869	0.203235
					YER046W	-0.352231	-0.827392	0.204206
					YGL206C	0.0702769	0.0942238	0.204387
					YDR353W	-0.272741	-0.0717491	0.205485
					YER110C	-0.715752	-0.073661	0.208537
					YLR350W	0.545344	-0.00305529	0.208787
					YDL180W	-1.0713	-0.0953302	0.208817
					YHR162W	1.11169	-0.229649	0.209056
					YHR142W	-0.302234	-0.157942	0.209176
					YEL063C	-0.178907	-0.153362	0.210268
					YPL092W	-0.230184	-0.343367	0.211057
					YGL019W	-0.0675067	-0.076727	0.211899
					YGR279C	0.881586	-0.222918	0.214506
					YHR050W	-0.416529	0.103647	0.215386
					YER052C	-0.148039	-0.316366	0.216558
					YGR086C	0.920329	0.103578	0.216648
					YNL125C	-0.153914	-0.325679	0.216714
					YBR121C	0.350031	0.0245338	0.216936
					YGL067W	-1.75463	-0.251234	0.218863
					YKL164C	0.66863	0.0228184	0.21971
					YGL157W	0.0537382	0.00744962	0.219726
					YDL081C	-0.186757	-0.250327	0.221015
					YHR020W	-0.681048	-0.0930112	0.221222
					YOR270C	-0.513643	-0.147212	0.221739
					YGR157W	-1.50824	-0.0529368	0.221973
					YNL263C	-0.46514	-0.193446	0.224072
					YPR165W	0.660493	0.0250606	0.226514
					YNL283C	-1.01768	-0.259997	0.226735
					YAL064W-B	0.183059	0.308083	0.22884
					YLR130C	-2.02787	-0.251064	0.229031
					YIR034C	0.338818	-0.0220616	0.230103
					YMR119W	-0.123485	-0.327545	0.231727
					YNL219C	-1.24413	-0.16934	0.232724
					YDR225W	0.661184	-0.173571	0.235178
					YGR135W	-0.0972844	0.0207872	0.235193
					YKL077W	0.524175	-0.0256923	0.237076
					YDL234C	0.194444	0.0421011	0.23904
					YHL004W	-1.13402	-0.0421072	0.2395
					YEL024W	0.471996	-0.209631	0.239592
					YBR187W	-0.983896	-0.101227	0.240459
					YNL165W	-0.24544	-0.360958	0.240617
					YIL039W	-1.64823	0.122963	0.241522
					YBR052C	-0.060077	0.0428887	0.241588
					YOR153W	0.641203	-0.0894627	0.242613
					YMR148W	0.551126	-0.378783	0.24531
					YIL050W	1.67172	0.0180176	0.24623
					YLR304C	0.304018	-0.0410334	0.246754
					YOR298C-A	0.432641	-0.0132311	0.246979
					YJL002C	-2.18308	-0.119331	0.247707
					YHR019C	-0.716419	-0.123376	0.251073
					YDR056C	0.482638	0.354837	0.251092
					YEL002C	-0.89276	-0.017552	0.254274
					YMR083W	0.63908	0.0925017	0.254292
					YMR054W	-1.23656	0.00437156	0.255329
					YFL039C	-0.143468	-0.175646	0.255456
					YOR008C	-0.448877	-0.17326	0.256645
					YMR088C	-0.271257	0.116018	0.257206
					YDR497C	-1.93005	-0.227247	0.258194
					YCR069W	-1.11358	-0.182603	0.259222
					YGL179C	0.210805	0.202627	0.259289
					YOR104W	-0.0725146	0.00742821	0.261725
					YJL159W	0.958621	0.0946078	0.262965
					YDR368W	0.199494	-0.0346817	0.263574
					YBL045C	0.648253	0.0416242	0.26419
					YBR036C	-1.18326	-0.344177	0.264414
					YPL042C	0.622857	-0.214871	0.266526
					YDR032C	0.0997427	-0.126252	0.267374
					YMR182C	-0.0396091	0.0641316	0.269492
					YDR150W	-0.33193	0.24874	0.269661
					YDR462W	0.0986226	-0.279808	0.269895
					YIL033C	0.0254565	-0.0924142	0.270937
					YPR138C	-1.21575	0.20823	0.273739
					YNR074C	0.0120182	-0.11661	0.274416
					YGL139W	0.334701	-0.0721783	0.276371
					YBR126C	-0.227965	0.0341244	0.276697
					YPL028W	-0.279065	-0.214247	0.277785
					YJR148W	-0.257952	-0.244559	0.279712
					YOL020W	-1.0505	-0.0921743	0.281279
					YNL055C	-0.473479	-0.206802	0.281313
					YNR030W	-0.470202	-0.00417852	0.28289
					YGR204W	-0.220421	0.0192887	0.283402
					YJR009C	-0.343016	-0.0820921	0.283947
					YKL096W-A	0.147934	0.00522742	0.284977
					YBR249C	0.281538	-0.103194	0.289337
					YPR133W-A	0.313174	-0.415364	0.290342
					YDR072C	-0.610493	0.122454	0.29252
					YDL185W	0.124317	-0.0141068	0.292685
					YJL101C	-1.38854	-0.0099321	0.296357
					YPL218W	-0.628607	-0.00781467	0.296913
					YDR343C	0.564344	-0.0279121	0.297301
					YKL150W	-0.186	-0.0645988	0.299885
					YCR028C	-1.19353	-0.0413584	0.301655
					YJL016W	0.090862	-0.0622846	0.302811
					YAL023C	-1.29349	-0.0957128	0.303585
					YNL097C	0.317891	-0.00469775	0.303694
					YHR002W	0.196162	0.20151	0.304739
					YGL248W	-0.319608	0.201515	0.305717
					YGR100W	-0.168013	-0.0255084	0.307186
					YKR045C	1.02782	0.856136	0.307621
					YLL009C	1.04731	0.326704	0.308132
					YMR205C	-0.154442	-0.153262	0.309601
					YLR259C	0.139426	0.052833	0.310232
					YMR291W	-0.0234826	-0.0745094	0.310387
					YBR096W	-0.215682	-0.0375596	0.311778
					YNL134C	0.367752	0.0527985	0.313187
					YML118W	0.907109	-1.4769	0.315641
					YEL013W	-0.555543	-0.0874856	0.317162
					YOL155C	0.600849	-0.0134563	0.319411
					YBR218C	-0.577399	-0.0462082	0.319981
					YPL020C	0.654079	0.167985	0.321186
					YGL032C	0.244475	-0.507125	0.322424
					YPL047W	-1.89377	0.334417	0.322487
					YHR047C	-1.74038	0.0204328	0.32284
					YPL154C	-0.353742	-0.272245	0.323699
					YBR013C	-0.257753	0.0948985	0.323816
					YDL045C	-0.657649	-0.0424274	0.325621
					YPR120C	-0.675566	-0.133968	0.325818
					YER048W-A	0.869943	-0.0460079	0.326973
					YLR258W	-0.586921	-0.0630973	0.327719
					YBR196C	0.17662	-0.0669073	0.331904
					YLR178C	-0.172129	-0.307017	0.334314
					YNL291C	-1.04683	-0.127754	0.334709
					YNR001C	-0.198629	-0.292179	0.335333
					YKL033W-A	-1.12583	-0.0479657	0.335418
					YLR044C	-0.145611	0.056367	0.337066
					YGR124W	0.473681	-0.00198642	0.337471
					YPL221W	-1.21048	-0.302775	0.34026
					YOR347C	-0.0711947	-0.139105	0.340623
					YGR189C	0.58035	-0.00858593	0.341188
					YOR307C	0.493093	-0.158633	0.344611
					YCR068W	-0.723821	-0.154529	0.34542
					YKL060C	-0.000686084	-0.0159396	0.348518
					YML100W	0.0564053	0.00326993	0.348777
					YLL039C	-0.490832	-0.0606888	0.349048
					YPR036W	-1.07046	-0.0702386	0.349118
					YHR183W	0.0663501	-0.0594757	0.350219
					YJL138C	0.631949	0.0139103	0.350533
					YPL061W	0.447264	0.157146	0.351883
					YBR039W	-0.216754	-0.0780737	0.352967
					YLR270W	0.0965363	0.0612484	0.353549
					YMR296C	-0.142741	0.21209	0.354716
					YHR043C	0.173208	-0.205332	0.354908
					YBR069C	-1.09139	-0.155111	0.355326
					YLR120C	0.319714	-0.103311	0.355916
					YDR382W	0.525626	-0.0560859	0.356729
					YCL017C	-0.0835221	-0.0705696	0.35708
					YLR432W	-0.174783	-0.178585	0.359522
					YKL138C	0.775919	0.352968	0.359999
					YHR179W	0.443172	0.00273263	0.360711
					YLR056W	-1.33892	-0.171493	0.361175
					YNL104C	-0.368501	-0.165467	0.362369
					YDR380W	0.927772	-1.13951	0.362473
					YDR387C	-1.57857	-0.590226	0.36283
					YAL012W	-0.00931766	-0.0310023	0.364259
					YOL105C	-0.331216	-0.894297	0.36443
					YFL037W	-0.882032	0.0671065	0.365405
					YJR143C	-0.888135	-0.0694284	0.367722
					YGL155W	-1.33635	-0.372976	0.368971
					YDL206W	-0.666928	0.192603	0.369042
					YDL131W	0.0703953	0.0769334	0.374947
					YAL053W	-0.23942	-0.168276	0.376795
					YJR044C	-0.183513	-0.0452474	0.377236
					YKL039W	-0.419503	0.0620874	0.377387
					YDL055C	0.152463	-0.0353493	0.381952
					YOR375C	-0.493358	0.0953733	0.382645
					YIR037W	0.420189	-0.105612	0.382794
					YDR349C	-1.6154	-0.142116	0.3828
					YNL294C	-1.76544	-0.184395	0.384794
					YLR355C	-0.184057	-0.0552184	0.384804
					YKL148C	0.122748	-0.00245402	0.387323
					YGL077C	-0.280683	-0.167342	0.387367
					YML128C	-0.672141	-0.00589182	0.38752
					YBR085C-A	0.86891	-0.157507	0.390945
					YKR013W	-0.308001	-0.0440548	0.392237
					YNR028W	-0.154365	-0.112756	0.394238
					YJL052W	-0.621618	-0.0895291	0.396591
					YIL053W	0.323375	0.0146047	0.396865
					YKR098C	-0.601276	0.604571	0.397089
					YKL174C	0.18342	-0.253547	0.397432
					YLR229C	-0.488595	-0.123112	0.399775
					YLL026W	0.326999	0.118246	0.40123
					YDL204W	-0.240998	0.00865279	0.402336
					YGR284C	0.032182	-0.02478	0.406309
					YNL200C	-0.700159	-0.290745	0.408819
					YMR267W	0.334801	-0.296654	0.410366
					YGR180C	0.104742	0.0262512	0.411005
					YPL132W	-0.712493	-0.0259732	0.412495
					YDR062W	-0.53694	-0.1054	0.414113
					YOL058W	-0.00925513	-1.2214	0.425415
					YPL177C	-0.093093	-0.151805	0.426599
					YJL208C	0.27835	0.244698	0.426701
					YDR162C	0.490364	0.440933	0.429934
					YGR247W	0.573186	-0.419381	0.43137
					YNL280C	-1.50416	0.0387986	0.432169
					YLR089C	-1.66009	-0.131096	0.435054
					YDR516C	-0.0796168	-0.0237647	0.435925
					YCR012W	0.160187	-0.204133	0.440229
					YIL031W	0.287329	0.448444	0.441758
					YGR257C	-0.185398	-0.13567	0.44177
					YKL183W	0.316001	-0.635458	0.443278
					YDL072C	-0.288863	-0.127269	0.445602
					YKL163W	-0.753081	0.00652134	0.446406
					YBR006W	-0.686918	0.131749	0.447324
					YPL087W	-0.312817	-0.0651137	0.448742
					YOR161C	-0.959412	-0.199604	0.450204
					YER081W	-0.754554	-0.401639	0.451324
					YGR161C	0.132554	-0.0624471	0.451749
					YLR340W	1.32626	-0.0873965	0.452905
					YOR230W	0.407836	-0.022899	0.454553
					YPL207W	-0.550664	0.0802231	0.460277
					YBR067C	0.224911	0.00954105	0.460282
					YNR055C	-0.947541	-0.0545809	0.463047
					YKL004W	-1.76012	-0.213035	0.463105
					YBL030C	-0.274989	-0.103809	0.465485
					YOR095C	-0.171798	-0.147928	0.467025
					YAR027W	-0.175977	0.0344166	0.467885
					YHR008C	-0.572445	-0.169319	0.477486
					YFR053C	-0.370397	0.052148	0.48045
					YGR192C	-0.435502	-0.0737716	0.48135
					YOL126C	0.36064	0.0200115	0.481425
					YMR015C	0.395095	0.0453462	0.482165
					YDR169C	0.161523	0.211185	0.482559
					YKL046C	-1.27308	0.00864493	0.485897
					YLR347C	-0.447185	-0.0487522	0.486213
					YGL253W	0.231471	0.0829578	0.495853
					YGR082W	0.0631564	0.0755011	0.496921
					YLR293C	0.814984	0.0491321	0.499279
					YGL058W	-0.0590041	0.0957699	0.500662
					YBR214W	-0.119046	0.0978509	0.501556
					YAL049C	-1.7993	0.28001	0.502396
					YJR001W	-1.59098	0.0526308	0.502921
					YDL190C	-0.662628	-0.116401	0.505294
					YDR247W	0.26984	0.0607406	0.509912
					YDR453C	0.365957	0.0292018	0.510536
					YLR414C	0.0735718	-0.23166	0.513816
					YNL168C	-0.0623897	-0.0517385	0.516454
					YDR066C	-1.39794	-0.441652	0.520441
					YGR205W	-0.00165749	-0.158203	0.522264
					YMR181C	-0.617971	-0.231304	0.525099
					YOL086C	0.172908	0.110335	0.527939
					YGR008C	0.0890063	-0.11263	0.533275
					YNL077W	-0.0604063	-0.185496	0.533449
					YPL250C	0.960423	-1.15938	0.535194
					YDR441C	-0.467825	-0.698429	0.539039
					YMR105C	-0.580608	0.136681	0.540106
					YGL167C	-1.34862	-0.269285	0.540753
					YML018C	-1.56282	-0.184676	0.544366
					YBR015C	-2.00172	-0.0115928	0.547626
					YMR215W	-0.217169	-0.0820323	0.549421
					YJL171C	-0.791446	-0.232662	0.551612
					YBR161W	-0.380743	0.242886	0.559097
					YBL026W	1.08576	0.276161	0.559762
					YIL155C	-0.339889	0.120526	0.561182
					YFR021W	-1.76958	-0.075787	0.561993
					YNL300W	1.33776	0.317219	0.568083
					YOR133W	-0.393885	-0.0901667	0.569826
					YKR050W	1.50018	-1.47253	0.575997
					YHR026W	-0.573713	-0.110401	0.579686
					YGR109C	0.687946	0.448308	0.581416
					YEL016C	-1.60564	-0.237118	0.581674
					YGL055W	-0.402365	-0.157921	0.583458
					YAL061W	0.43015	0.00506595	0.585693
					YLR109W	0.817017	0.182056	0.593417
					YNL190W	-1.09144	0.0292322	0.593877
					YGL194C-A	-0.169995	0.540881	0.600952
					YLR327C	0.757722	-0.0507303	0.610765
					YLR297W	-0.661596	0.198887	0.610803
					YOL077W-A	1.09822	0.147755	0.611679
					YDR502C	-0.901685	0.0212052	0.613259
					YJL026W	-0.601191	-0.00349449	0.617631
					YOR099W	-1.83805	-0.257477	0.627058
					YGR106C	-1.0178	0.0494401	0.659628
					YMR010W	-2.04209	-0.216586	0.675492
					YLR149C	-0.0972492	-0.217592	0.700184
					YER067W	0.0636681	-0.0904137	0.701312
					YAL034C	1.7113	-0.18163	0.709638
					YMR257C	-1.04694	-0.644641	0.740332
					YMR238W	-0.908104	-0.167336	0.744033
					YHR131C	-0.971225	0.182889	0.757979
					YPR109W	-0.430218	0.0411337	0.775649
					YDR481C	-1.46656	0.0335403	0.780896
					YMR034C	-0.509681	-1.04436	0.794419
					YCR021C	0.439322	0.0822902	0.80319
					YHR087W	0.326426	-0.181374	0.885533
					YBR208C	-1.71054	-0.228088	1.00036
					YAR023C	1.72039	3.61066	1.10034
					YBR072W	0.169115	0.232719	1.24413
					YGR146C	-0.211258	-0.469389	1.7076
					YOR355W	-1.703	0.651027	1.73674
					YGL215W	-2.20599	0.936415	2.43228
					YFL050C	-4.10636	1.81406	3.17428

## Sheet: Fig 6Aii
Conserved AUG-uORF mRNAs (N=350)	WT+SM/WT	eIF2AΔ/WT	eIF2AΔ+SM/WT+SM		Conserved NCC-uORF mRNAs (N=420)	WT+SM/WT	eIF2AΔ/WT	eIF2AΔ+SM/WT+SM
YJR004C	-0.295595	-1.90512	-3.01255		YBL052C	0.0242139	-0.253944	-1.34973
YDR366C	2.15833	1.12153	-2.24994		YCR045W-A	0.524144	-0.217346	-1.05378
YHR157W	0.373229	-3.44075	-2.18302		YPR185W	-0.586662	-0.194969	-0.844319
YPL148C	1.08258	0.74036	-1.73778		YOR198C	-0.320173	-0.0847485	-0.717882
YBL039W-B	-0.443013	0.0172445	-1.64809		YPL239W	0.809248	-0.154291	-0.717626
YDR052C	0.753345	0.230667	-1.54572		YGL256W	-2.16069	-0.433194	-0.708258
YKL161C	0.888253	0.512394	-1.35299		YLR009W	0.291797	0.131022	-0.686317
YOR180C	2.12056	-2.02096	-1.2406		YKL053C-A	0.599521	-0.189889	-0.682827
YPL034W	2.66687	1.37712	-1.19899		YDR389W	-0.113071	-0.0173225	-0.656587
YCR045W-A	0.524144	-0.217346	-1.05378		YIL122W	0.239269	-0.742278	-0.642326
YEL072W	0.358493	-0.0397957	-1.00917		YKL032C	0.847391	0.142248	-0.615699
YDL053C	0.261495	-0.131636	-0.893639		YNL186W	0.00208029	-0.0438519	-0.577855
YDR073W	0.159501	-0.0105646	-0.824833		YOL036W	0.65408	0.013628	-0.561771
YMR320W	-0.566867	-0.219679	-0.776584		YML117W	-0.681844	0.0358181	-0.551169
YLR330W	0.567123	0.0754147	-0.762384		YNL229C	0.445069	-0.093615	-0.54986
YPR167C	1.26535	-0.262025	-0.740095		YNL197C	-0.207412	-0.224645	-0.54433
YDR357C	0.311551	0.0250783	-0.729274		YDR027C	-0.050987	-0.125374	-0.515552
YHR135C	-0.57966	-0.127553	-0.729182		YMR006C	-1.62192	-0.293028	-0.511623
YBR253W	0.245201	-0.0569565	-0.712554		YPL190C	0.453859	0.0518774	-0.505957
YDR379C-A	-0.601589	-0.31039	-0.674765		YMR126C	0.308361	0.461979	-0.502945
YLR313C	1.69274	0.295282	-0.666942		YDR507C	0.238231	-0.22992	-0.497227
YPR194C	0.638968	-0.0978007	-0.666047		YDR351W	-0.0249915	0.0477957	-0.496056
YGL258W	-0.590551	-1.87512	-0.66348		YDR034C	-0.618977	-0.194125	-0.491407
YML006C	0.534206	0.0471332	-0.643823		YPL016W	0.645324	-0.128074	-0.488841
YNL042W	0.417243	0.39301	-0.638432		YPL089C	1.0013	0.26703	-0.481461
YPL164C	1.20443	0.432084	-0.636015		YDR028C	0.409511	-0.0804056	-0.480516
YPR018W	1.32511	0.152109	-0.628152		YOR326W	-0.326481	0.0554204	-0.474249
YFR027W	1.56879	0.00752327	-0.592589		YPL052W	-0.170796	-0.32593	-0.463917
YKR022C	1.04346	0.112013	-0.579922		YGL008C	-0.0126615	-0.170744	-0.456702
YDR228C	-0.305636	-0.11216	-0.577958		YLR223C	1.35057	0.228859	-0.454303
YNL186W	0.00208029	-0.0438519	-0.577855		YHR210C	1.58061	0.535589	-0.451944
YMR255W	1.03986	0.108974	-0.575125		YKL101W	0.537231	0.119135	-0.447005
YJL140W	-0.374203	-0.237721	-0.557596		YDL224C	-0.264031	-0.3077	-0.44577
YOL018C	0.541565	0.0585224	-0.545231		YJL124C	0.473181	-0.254396	-0.442653
YBR162W-A	0.232926	-0.0499282	-0.522085		YDL028C	0.743174	-0.0639928	-0.420844
YDL002C	-0.304922	0.116427	-0.516112		YMR043W	0.0322119	-0.181683	-0.412969
YMR239C	0.965469	0.0110439	-0.511655		YMR089C	-0.156936	-0.0737788	-0.412242
YMR126C	0.308361	0.461979	-0.502945		YHR129C	0.339171	-0.229183	-0.409867
YPR072W	0.641196	0.226811	-0.497102		YLR353W	0.189516	-0.370746	-0.40884
YJR134C	1.04454	0.300638	-0.49239		YGL044C	0.772437	0.20179	-0.386715
YDR034C	-0.618977	-0.194125	-0.491407		YER159C	1.14957	-0.0959739	-0.379107
YER115C	-0.392147	-0.527026	-0.479572		YDR276C	1.075	-0.288825	-0.374189
YOR342C	0.206071	0.120289	-0.472949		YNL161W	0.570372	-0.0676208	-0.370764
YPL146C	1.35912	0.389702	-0.469747		YOL123W	0.498184	-0.0592913	-0.366636
YLR271W	1.09821	0.38218	-0.464922		YLR206W	-0.972548	-0.201632	-0.358249
YNL164C	0.093702	0.0804474	-0.447195		YOR261C	0.348916	0.0251764	-0.353655
YGL134W	0.13402	0.0131776	-0.446672		YAL029C	-0.236675	0.0999797	-0.351905
YIL038C	0.43634	0.0700524	-0.428266		YMR001C	0.632469	0.0638232	-0.350886
YDL028C	0.743174	-0.0639928	-0.420844		YLR190W	0.203223	-0.385647	-0.348852
YKR061W	-0.793312	-0.523932	-0.419771		YKL063C	0.973405	0.0232147	-0.335278
YJL100W	-0.539732	-0.179006	-0.404895		YDR237W	-0.257721	-0.204266	-0.332775
YJR154W	1.98949	-0.757977	-0.396693		YER114C	-0.674351	-0.112362	-0.328693
YOL001W	-0.564887	0.0155778	-0.395662		YMR139W	-0.0401014	-0.0133803	-0.321807
YPR070W	-0.310415	-0.0588779	-0.390787		YBL085W	0.850496	0.180745	-0.319383
YLR164W	-1.39256	-0.0197752	-0.385621		YDL014W	0.85218	0.0976454	-0.306524
YER159C	1.14957	-0.0959739	-0.379107		YLR378C	-1.5232	-0.131305	-0.306107
YER129W	-0.300152	0.0686397	-0.363358		YER107C	-0.9604	-0.266301	-0.303994
YGL071W	-0.110139	-0.190007	-0.336856		YBR140C	-0.05947	0.241301	-0.291752
YBR242W	-0.30721	-0.252683	-0.333939		YER148W	0.46118	-0.137981	-0.289618
YNL217W	0.235856	0.218116	-0.331776		YHR030C	0.214393	-0.0895885	-0.286424
YBR168W	-0.844688	-0.466928	-0.325176		YKL054C	0.556909	0.197756	-0.285636
YOL112W	-0.946119	-0.366906	-0.314748		YEL009C	5.3137	-0.330927	-0.285443
YIL002C	0.0602155	0.13174	-0.307417		YDR372C	-0.356948	-0.138589	-0.284609
YKR091W	0.924523	-0.427761	-0.297322		YML121W	-0.360862	0.175467	-0.280996
YNL147W	1.5156	0.0183455	-0.297137		YOR370C	0.180541	-0.0967015	-0.280795
YEL009C	5.3137	-0.330927	-0.285443		YMR100W	-0.263191	-0.320304	-0.271754
YBR158W	-0.548021	0.106463	-0.274407		YDL019C	-0.265983	-0.173096	-0.270884
YDR242W	2.89149	0.632491	-0.263934		YBL047C	-0.178203	0.0334835	-0.266636
YBL009W	0.922405	0.0417371	-0.257836		YPR008W	0.99385	-0.0122079	-0.266351
YMR271C	0.961886	0.0414681	-0.256977		YOR360C	-1.41857	-0.409945	-0.263254
YCL016C	0.117807	-0.00970884	-0.256784		YDL145C	-0.721802	-0.201472	-0.257626
YHL008C	-0.328219	-0.293858	-0.255385		YDR086C	0.831745	-0.00609857	-0.254177
YBR295W	0.612088	-0.656633	-0.255243		YNL090W	-0.68669	-0.210731	-0.253651
YDL176W	-0.0456127	0.393135	-0.252811		YNL231C	0.556716	0.0369578	-0.253227
YGR071C	0.431848	-0.0383353	-0.247685		YLR006C	-0.221487	0.12564	-0.250016
YHR011W	1.98166	0.536572	-0.243229		YGR218W	-0.0737536	-0.00786947	-0.247847
YOR033C	-0.0414402	0.190988	-0.242675		YHL034C	0.859149	0.142175	-0.247139
YNL076W	0.555085	0.282776	-0.233033		YOR043W	0.0382532	-0.176993	-0.245928
YMR009W	-1.5071	-0.401504	-0.232217		YPL243W	-0.0450059	0.0616498	-0.244615
YBR213W	1.17051	0.322601	-0.225715		YNL085W	-0.316496	0.0234762	-0.242396
YPR085C	0.265649	-0.117076	-0.221304		YNL076W	0.555085	0.282776	-0.233033
YLR073C	-2.15563	0.0167413	-0.21952		YER094C	-1.08448	0.0276365	-0.230665
YGR057C	0.204532	0.631174	-0.217192		YML071C	1.65137	0.26746	-0.230185
YPL036W	-0.36428	-0.187974	-0.212463		YNL098C	-0.237848	-0.0787377	-0.228609
YML108W	1.02122	-0.181872	-0.206904		YDL195W	-0.718678	-0.0355842	-0.225233
YDR065W	-0.533736	-0.521797	-0.206851		YDR505C	0.5176	-0.0856716	-0.222254
YOR231W	-1.17868	-0.584562	-0.198932		YDL084W	-0.742664	-0.132002	-0.221428
YDR206W	-0.204169	-0.257223	-0.197616		YIL115C	0.0797787	-0.0582731	-0.220464
YNL211C	0.255619	0.563097	-0.187759		YGR054W	0.0495512	0.465271	-0.215596
YBR210W	0.144172	0.124731	-0.18567		YDR266C	-0.169272	0.0270793	-0.213984
YHR114W	0.630836	0.335921	-0.180033		YBL081W	-0.160152	-0.00586767	-0.213296
YDR147W	0.107834	0.029992	-0.179539		YDL141W	-0.00339543	0.116967	-0.210886
YDR408C	-1.38935	-0.333385	-0.179436		YER123W	-0.351308	0.103547	-0.210071
YNL053W	-0.130713	0.0201442	-0.169633		YLR019W	-0.657129	-0.255212	-0.208879
YMR269W	0.245611	-0.21757	-0.166768		YCR027C	0.221072	0.151003	-0.207424
YLR100W	-0.702144	-0.0800128	-0.161097		YEL037C	-0.23236	0.00324463	-0.203698
YMR090W	0.0847037	-0.342252	-0.157734		YDR352W	-0.510163	-0.176661	-0.201548
YJR054W	0.449021	0.079676	-0.150275		YGR229C	0.0943689	0.0264819	-0.201241
YKL190W	-0.00319904	0.157844	-0.147954		YKR028W	-0.894008	0.00104301	-0.198965
YBL060W	-0.135512	-0.359098	-0.147951		YDR206W	-0.204169	-0.257223	-0.197616
YAL002W	0.537278	0.280521	-0.141982		YGL115W	-0.0474701	-0.0829497	-0.196351
YGL197W	-0.404512	0.0380289	-0.140189		YPL235W	0.514414	0.015938	-0.192148
YJL156C	0.706349	-0.32454	-0.139631		YDR122W	0.377738	0.0918809	-0.189614
YGL169W	0.142192	0.134442	-0.130677		YDL132W	0.0523423	0.19721	-0.184088
YPR021C	0.524328	0.0391726	-0.130214		YDR178W	0.908766	-0.358794	-0.183618
YOL117W	0.460604	0.527536	-0.121762		YDR381W	-0.359639	-0.220644	-0.182156
YML106W	-2.25036	-0.198991	-0.114351		YLR342W	-1.65012	-0.235229	-0.1787
YML055W	0.326046	0.128456	-0.110944		YPL228W	0.972557	0.23272	-0.178227
YKL061W	1.07586	-0.100621	-0.102181		YNL201C	0.374606	0.244539	-0.177304
YDR045C	-0.256102	-0.365374	-0.101016		YDL136W	1.0253	0.120008	-0.172822
YMR229C	-0.244427	0.126924	-0.0966837		YHR165C	0.56419	0.089656	-0.171396
YDR275W	-2.20127	-1.00768	-0.0961596		YPL019C	-0.41789	-0.112821	-0.165773
YOR108W	-0.664801	-0.0592161	-0.0960417		YMR216C	-0.214782	-0.102536	-0.165348
YMR234W	0.475496	0.0575566	-0.0957157		YAL017W	-0.0717783	-0.00944809	-0.162431
YLL027W	0.589048	-0.158614	-0.089561		YPR124W	-0.300143	-0.103299	-0.158167
YBR030W	0.113339	-0.121282	-0.0886931		YOR142W	-1.24803	-0.262865	-0.156597
YDR047W	-0.583702	-0.287443	-0.0827122		YER089C	0.00645307	-0.127528	-0.156272
YIL119C	-0.944678	-0.0322242	-0.081429		YGR267C	-0.337784	-0.0934416	-0.153906
YDR362C	0.288578	-0.214484	-0.0809646		YER132C	-0.117656	-0.191104	-0.153597
YIL059C	2.27815	-1.48405	-0.0809507		YPL110C	0.542666	0.174348	-0.148866
YOL012C	-0.0457204	-0.100305	-0.075492		YBR212W	-0.151624	-0.257694	-0.144865
YGL063W	-0.0632536	-0.579635	-0.0750548		YPR036W-A	1.46275	-0.319013	-0.144313
YIL084C	0.744119	0.0633662	-0.0715648		YDR280W	0.372013	-0.0359453	-0.143803
YGR215W	-0.148281	0.0968676	-0.0696839		YGR143W	-0.311509	-0.125006	-0.143115
YGL191W	0.558708	0.0353259	-0.068209		YOR094W	-0.0710328	0.249868	-0.142678
YHR046C	-0.595854	0.184462	-0.0670847		YNL207W	-0.294836	0.015093	-0.141221
YOR057W	-0.0514803	-0.0635189	-0.0645428		YDR153C	0.342595	0.0992926	-0.137071
YGR093W	-0.483063	-0.0316498	-0.0638374		YDL140C	-1.0195	-0.13769	-0.136955
YPL115C	-0.307423	-0.035514	-0.0614472		YDL130W	1.09851	-0.127638	-0.136671
YMR123W	-0.329606	-0.0221007	-0.0611851		YMR108W	0.773047	-0.15541	-0.133375
YOR149C	-1.97769	0.0403615	-0.0572464		YFR049W	1.11682	0.192816	-0.130836
YKL001C	0.230895	-0.165989	-0.0572368		YOR233W	0.644504	0.0283185	-0.128072
YOR222W	-1.39402	-0.119646	-0.0493987		YLR257W	0.0710345	-0.0692718	-0.1277
YML007W	-0.565742	0.149686	-0.0485852		YNL189W	0.286115	0.00397368	-0.127418
YOR030W	0.598175	-0.123716	-0.0462846		YDR219C	0.632116	0.0436925	-0.126838
YBL029C-A	1.47994	0.11732	-0.045395		YNL064C	0.45286	0.0267229	-0.123808
YDR063W	0.335415	0.127162	-0.0399638		YGR014W	-0.151961	-0.322443	-0.123381
YGL257C	-1.22755	-0.113705	-0.0390021		YFL038C	0.715405	0.0852579	-0.119705
YKL182W	-1.17725	-0.256464	-0.0346405		YPR156C	-0.14739	-0.0973886	-0.119629
YNL156C	0.588817	-0.036047	-0.0344987		YDR293C	-0.472219	0.105335	-0.117716
YPL140C	-0.754604	-0.623433	-0.0293688		YML106W	-2.25036	-0.198991	-0.114351
YDR103W	0.544017	0.0781484	-0.0268952		YDL020C	-0.799542	-0.370894	-0.107768
YDL133W	0.112994	0.182435	-0.0268834		YOL081W	0.775972	0.17906	-0.103053
YKL064W	-0.151571	0.0931403	-0.0260074		YJL084C	-0.139755	-0.066572	-0.0990582
YKL120W	0.540736	0.0511466	-0.0237139		YPL145C	-0.503914	-0.0707511	-0.098742
YDR085C	0.926739	0.623787	-0.0224601		YHR103W	-0.163262	-0.0536783	-0.096375
YDR046C	0.0655691	-0.161484	-0.0218744		YOR116C	-0.778588	0.0291586	-0.0951671
YLR287C	-0.143464	0.255898	-0.0192745		YBR078W	0.350704	-0.193815	-0.0947097
YCR036W	-0.511398	-0.0302605	-0.0153874		YDL160C	0.473246	-0.148598	-0.0943834
YOL038W	0.524038	0.0081288	-0.012951		YOR117W	0.734029	0.0992987	-0.0918227
YLR188W	-0.259471	0.0945726	-0.00974722		YMR200W	-0.385018	0.0219426	-0.0903326
YML023C	-1.2046	-0.479482	-0.00965952		YJL085W	0.582232	0.587003	-0.0877266
YOR376W-A	-1.00472	-0.545333	-0.0083646		YBR154C	0.929934	0.00770818	-0.0870261
YJL065C	0.416613	-0.429859	-0.00641216		YOR090C	-0.427063	-0.0581949	-0.0869791
YGR166W	0.234019	0.0301472	-0.00488857		YKL125W	0.489965	0.0589562	-0.0859512
YEL006W	0.561255	0.223986	0.00352878		YCR084C	0.421463	-0.0819118	-0.0791436
YML064C	-0.0204645	-0.194421	0.00485409		YHL027W	0.0960097	-0.0374936	-0.0763418
YKL040C	0.637037	0.359534	0.0065198		YDR093W	-1.95161	-0.0431909	-0.0754169
YBL064C	0.516593	0.00531077	0.00807496		YGL123W	-0.0975807	-0.286717	-0.0735352
YPL045W	0.993096	0.138181	0.00824353		YOL109W	1.47572	0.216239	-0.0724043
YLR152C	1.56557	-0.646881	0.0091		YKL126W	-0.605401	-0.0607522	-0.071926
YDL125C	-1.24004	-0.0378	0.00937321		YDL006W	0.263923	0.0704952	-0.0712937
YJR102C	0.124146	0.289811	0.0135746		YDR186C	-0.443279	0.0621192	-0.0704323
YOL100W	-0.677606	-0.407582	0.0136226		YGL133W	1.83816	0.210748	-0.0692713
YPL160W	-0.330228	0.186741	0.0143402		YBR283C	-1.40484	-0.248492	-0.0670298
YHR022C	-0.269077	-1.31158	0.0148401		YKL212W	0.128666	-0.121729	-0.0653288
YHR078W	-1.88829	-0.301192	0.0152082		YIL052C	0.929858	-0.0691312	-0.0534897
YML068W	1.49759	-0.5019	0.0181137		YLR256W	0.509771	0.324027	-0.0503308
YDR384C	-0.242007	0.232304	0.0191104		YLR150W	-0.208545	0.071758	-0.0497689
YPL236C	-0.681216	0.0721989	0.0214093		YDR170C	-0.519042	-0.0531584	-0.0466694
YBR028C	-0.160382	-0.359919	0.0226527		YDR457W	0.3414	0.16797	-0.0450964
YDL076C	0.103931	0.136984	0.0265995		YOR049C	-0.0154517	0.338789	-0.0436886
YML056C	-2.2035	-0.0728554	0.033141		YLR220W	0.117107	-0.0532458	-0.0425875
YMR145C	0.656706	-0.0576938	0.0365081		YJL080C	-0.241775	0.025616	-0.042514
YDR472W	-1.10319	-0.0518696	0.0369941		YDR468C	-0.133862	0.276795	-0.0422195
YER041W	-0.0783757	0.0463863	0.0395824		YDR111C	-0.866832	-0.224981	-0.0419261
YKL026C	-0.173933	0.264424	0.041625		YFL036W	-0.212043	0.0481151	-0.0383973
YLR047C	-0.532167	-0.623154	0.0419814		YKR042W	1.17882	0.0842402	-0.0383335
YPL008W	0.151573	-0.0316227	0.0444612		YBR160W	0.362216	0.0717553	-0.0383213
YCR030C	0.35974	-0.0536333	0.0449482		YGR193C	0.46014	0.301641	-0.0381447
YPR028W	-0.0689124	0.00437667	0.046186		YNR018W	0.213021	-0.111838	-0.0367919
YHR079C	0.383892	0.101358	0.0476174		YJL047C	0.10047	0.125527	-0.0349726
YJR058C	-1.12981	-0.513752	0.0560795		YKL182W	-1.17725	-0.256464	-0.0346405
YMR171C	-0.761642	0.0804688	0.0565317		YNL156C	0.588817	-0.036047	-0.0344987
YLR021W	0.660182	0.204187	0.0575654		YPL158C	2.04662	0.161848	-0.0317932
YBR145W	0.02335	-0.839965	0.0583748		YOL087C	-0.130806	0.180519	-0.0312869
YDR001C	-0.064497	-0.0560544	0.0599859		YER125W	-0.742758	-0.227542	-0.0310512
YDL070W	0.426783	-0.010809	0.0630951		YPL260W	0.785265	0.0432886	-0.0307663
YLL051C	-1.45302	-0.409638	0.0633356		YDR326C	0.4369	0.0144055	-0.0302677
YLR126C	1.12826	0.3132	0.0754641		YDR071C	0.670229	-0.00524649	-0.0300325
YPL068C	0.212217	0.137443	0.0780521		YOR267C	0.765954	0.258886	-0.0298533
YNL094W	-0.773957	0.0719755	0.0811069		YNR016C	-0.815649	-0.15316	-0.0283755
YOR219C	-0.42681	0.446734	0.083129		YPL106C	0.208349	-0.00941962	-0.0254349
YOL082W	-0.727151	-0.0949059	0.0831692		YLL028W	-0.0210227	-0.08795	-0.0217296
YCR023C	-0.0153233	0.00877374	0.0835615		YDR477W	0.298836	0.0725692	-0.0151543
YKL181W	-1.24832	-0.110768	0.0869585		YNL007C	0.363476	0.0149277	-0.0124931
YDR265W	0.490288	-0.0795796	0.0900751		YDR232W	-1.0387	-0.148701	-0.0113089
YIL077C	0.440842	-0.0126957	0.0927992		YMR308C	-0.32691	0.0445219	-0.00964415
YPL214C	-0.468087	-0.0340163	0.0961279		YLR360W	-0.0701469	0.131412	-0.00806397
YOR061W	0.350962	0.0328789	0.0969644		YER078C	-0.213627	0.126906	-0.00638862
YPL088W	-0.254282	-0.654167	0.0974901		YHR159W	0.180219	-0.0197102	-0.00250481
YBL002W	0.554998	-0.122096	0.0997099		YBR221C	0.0278139	-0.224151	0.00023775
YOL125W	0.154647	0.465127	0.101292		YPR108W	0.322199	0.246187	0.00325877
YIL007C	0.508177	-0.100337	0.111665		YER118C	-0.941377	-0.0553039	0.0067572
YOR303W	0.93813	-0.631645	0.112869		YDR251W	-0.763159	-0.0285889	0.00937629
YNL115C	-0.4852	0.0231955	0.112903		YHR021C	0.588305	-0.26594	0.0108238
YKR044W	-1.00941	-0.20395	0.11326		YGL190C	0.00906816	0.0147756	0.0121629
YMR195W	0.180084	-0.703127	0.113872		YDR492W	-0.272885	-0.256757	0.0133601
YJL133W	0.0338849	0.127977	0.116298		YLR407W	-0.0239672	0.134951	0.0140153
YIL094C	0.452181	0.0146497	0.116502		YLR460C	-0.531179	-0.0640868	0.015305
YGL028C	0.785049	0.00403793	0.117379		YLR359W	-0.8133	-0.045854	0.0153132
YKL109W	0.255	0.231979	0.119149		YJL079C	0.0181835	0.0944707	0.0188886
YLR328W	-0.264345	-0.0329251	0.122047		YMR305C	0.088589	-0.436719	0.022449
YOR162C	0.552446	0.0127423	0.1232		YNL251C	0.0622093	-0.118147	0.0226848
YMR258C	-0.00775088	0.280235	0.123794		YGR138C	0.0873997	-0.0179369	0.0231109
YOR136W	0.0280039	-0.12364	0.124163		YBL004W	-0.382774	0.128981	0.0242601
YAL014C	-0.460711	-0.00680569	0.124923		YJL174W	-0.443412	-0.23192	0.0271033
YOR152C	0.042539	0.5027	0.125374		YGR250C	0.262295	-0.034798	0.027155
YKR003W	-0.396801	-0.261904	0.133527		YPL067C	-0.137701	-0.331979	0.0314079
YJL179W	1.5656	0.0195023	0.137223		YKL104C	0.0986452	0.00965828	0.0333724
YDR414C	-0.874915	-0.155817	0.137368		YER100W	0.331829	0.119403	0.0339897
YPL234C	-0.0898118	-0.0872286	0.145472		YPL049C	0.241812	0.151655	0.0354298
YHR009C	-0.220352	-0.0899778	0.145473		YMR145C	0.656706	-0.0576938	0.0365081
YDR334W	0.911222	0.313512	0.146436		YJR007W	0.761795	0.0788114	0.0375602
YFR020W	-1.81357	-0.61998	0.147474		YGR240C	0.120019	-0.14234	0.0375658
YKL041W	0.649447	-0.0259666	0.147524		YOL028C	-0.190336	-0.310386	0.037703
YOL002C	-0.644587	-0.183211	0.15056		YDR395W	-0.0857094	0.0323656	0.0390178
YJL063C	-0.835327	-0.168415	0.150963		YKL184W	-0.41987	-0.311108	0.0391545
YMR176W	-1.76268	-0.249164	0.152795		YER090W	0.0383828	0.00333697	0.0412489
YBR270C	-0.647909	-0.781451	0.157364		YDL134C	-0.479801	-0.201741	0.0436391
YLR299W	-0.858539	-0.256052	0.161901		YHR195W	0.386664	0.278617	0.0442206
YDR038C	0.0019307	-0.0247544	0.162896		YGR191W	-0.543744	-0.124716	0.0445079
YLR453C	0.937366	0.128183	0.163155		YMR246W	-0.710417	-0.0279155	0.0446855
YBR086C	-1.18733	-0.204177	0.163383		YCR030C	0.35974	-0.0536333	0.0449482
YEL036C	-1.41434	0.260672	0.163681		YDR143C	0.758998	0.271651	0.0449823
YHR072W	-1.00548	0.202398	0.166679		YGL202W	-0.642414	-0.180996	0.0463075
YJL106W	4.14239	-0.604403	0.16791		YLR034C	-0.0138184	-0.172314	0.0472043
YKL198C	0.741816	0.266672	0.174333		YMR241W	-1.57095	0.00239055	0.0508944
YOR272W	0.200502	0.240099	0.177958		YAR015W	0.381228	0.210572	0.0560253
YCR019W	0.0200506	-0.122077	0.180358		YDR452W	-0.738272	-0.0720133	0.0561157
YOL130W	-0.375235	-0.212847	0.181953		YHL003C	-0.976064	-0.0820522	0.0566082
YDR160W	-0.268534	-0.512932	0.182596		YPR024W	0.0576965	0.0256457	0.0583606
YGR095C	0.0211182	0.0353445	0.191163		YDR348C	-0.0728379	0.122099	0.0586299
YNL036W	1.34745	0.560351	0.199326		YGL135W	-0.153253	-0.204749	0.0587515
YDR530C	-1.51391	-0.201131	0.201593		YOL103W	-1.10432	-0.454618	0.0593922
YLR242C	-0.434735	-0.0584039	0.201988		YFL005W	0.496463	0.176821	0.0604225
YOR011W	-0.491882	-0.0869584	0.203981		YCR011C	-0.159506	-0.0690095	0.0607201
YGL090W	0.419593	0.186913	0.205373		YPL265W	0.436099	-0.202487	0.0627495
YIL028W	-1.76747	0.330274	0.207344		YCR024C-A	-1.62737	-0.307082	0.0656869
YKL029C	0.250664	0.0733277	0.209718		YOR232W	1.05813	0.0610427	0.0674312
YLR413W	-0.32874	-0.0258792	0.210093		YML058W	0.0941202	-0.0201677	0.0686959
YDR531W	0.0187169	0.23095	0.210173		YML086C	-0.00899771	0.0418857	0.0724261
YLR431C	-0.155456	-0.266147	0.215091		YIL117C	0.208555	-0.105611	0.0757086
YNL125C	-0.153914	-0.325679	0.216714		YPR016C	0.379969	0.0728645	0.0768311
YDR036C	-0.143072	-0.185275	0.218347		YOR247W	0.998285	-0.410035	0.0790847
YBL068W	0.272848	-0.260729	0.218674		YEL022W	-0.0529258	0.0819043	0.0806143
YAL064W-B	0.183059	0.308083	0.22884		YDR033W	-0.0994971	-0.239945	0.0806756
YIL124W	-0.0875595	-0.0582341	0.230465		YKL181W	-1.24832	-0.110768	0.0869585
YGR149W	-0.0102062	-0.378072	0.234114		YOR346W	-0.0193241	0.0955256	0.0893772
YOL137W	-0.155622	0.0433573	0.235356		YHR007C	-0.49693	-0.151118	0.0896758
YBR187W	-0.983896	-0.101227	0.240459		YDR346C	-0.00210742	-0.0452744	0.091571
YIL050W	1.67172	0.0180176	0.24623		YPR149W	0.794466	-0.199915	0.0926098
YPR144C	-0.0865937	0.0232633	0.248442		YCR004C	0.00345949	-0.0698611	0.0938838
YGR052W	-0.177957	-0.167837	0.256141		YOR061W	0.350962	0.0328789	0.0969644
YGR122W	0.0753728	0.130998	0.25642		YLR286C	-0.0631669	0.0305354	0.0987562
YDL138W	0.696435	-0.0411785	0.258192		YBL002W	0.554998	-0.122096	0.0997099
YDL198C	-0.538456	-0.326485	0.261697		YEL026W	1.38147	-0.197076	0.102099
YBR093C	-1.60146	-0.0424935	0.263696		YDR284C	-0.838709	-0.218572	0.104302
YNR074C	0.0120182	-0.11661	0.274416		YPL202C	0.605813	-0.247968	0.108503
YJL098W	-0.178201	0.172782	0.291163		YGR175C	0.290266	-0.0155744	0.108997
YMR222C	-0.257581	-0.268536	0.292602		YHL011C	-1.03418	-0.140776	0.111319
YOL159C	-1.09093	-0.35894	0.293576		YFL009W	-0.153645	-0.140585	0.112366
YCR028C	-1.19353	-0.0413584	0.301655		YBL099W	0.516351	-0.19011	0.113267
YNL003C	-1.15285	-0.742598	0.301732		YLR372W	-0.556127	-0.126108	0.115061
YGL001C	-0.208093	-0.0460226	0.30221		YGR195W	0.379054	0.126271	0.11579
YER186C	3.69831	-0.0713995	0.303658		YLR332W	0.19833	-0.128783	0.116336
YNR044W	0.226041	-0.137266	0.306316		YGL028C	0.785049	0.00403793	0.117379
YGL136C	-0.308203	-0.486284	0.308306		YPL159C	-0.420879	-0.184311	0.120701
YBR085W	-1.52421	-0.116671	0.311157		YDL171C	-0.623411	0.0403495	0.121492
YMR135C	-1.02863	0.164581	0.312305		YGR209C	1.10986	-0.230928	0.125479
YPL057C	-0.090515	0.130673	0.31254		YIL109C	-0.629324	0.0163643	0.128197
YGR065C	0.687059	-0.289775	0.313727		YPL179W	1.23224	0.218673	0.128649
YMR192W	0.442049	0.061832	0.313864		YIL048W	0.00523504	-0.102069	0.130267
YDR005C	0.294434	-0.0881283	0.323996		YDR298C	0.23018	-0.26028	0.134287
YDL177C	0.103037	-0.524453	0.325665		YDR414C	-0.874915	-0.155817	0.137368
YNL191W	0.146003	0.186126	0.342622		YGL097W	0.370287	-0.000206083	0.139193
YOR307C	0.493093	-0.158633	0.344611		YJR121W	-0.0840903	-0.182232	0.139309
YMR319C	-0.605784	-0.0537761	0.346884		YGR038W	0.163056	-0.385252	0.142779
YKL019W	-1.62174	-0.191964	0.353237		YNL288W	0.00317857	-0.106899	0.145241
YNL249C	-0.169869	-0.113491	0.357701		YHR009C	-0.220352	-0.0899778	0.145473
YDR387C	-1.57857	-0.590226	0.36283		YNL289W	0.690961	0.235387	0.150188
YOL105C	-0.331216	-0.894297	0.36443		YLR300W	-0.274346	-0.0548277	0.150732
YDL206W	-0.666928	0.192603	0.369042		YDR303C	-0.0538493	-0.174957	0.152122
YOR118W	0.208205	-0.00486915	0.376378		YIL125W	0.277484	-0.00632479	0.15374
YGL096W	1.20088	0.424586	0.380213		YPL125W	-0.152945	0.100835	0.155733
YOL011W	0.295285	0.151771	0.383611		YLR248W	0.155386	-0.0273403	0.159521
YJL126W	-0.166077	0.0945087	0.386159		YPR159W	-1.49211	-0.194776	0.160655
YML128C	-0.672141	-0.00589182	0.38752		YNL037C	0.0126894	-0.129837	0.163297
YHL026C	-0.630906	-0.831367	0.395601		YOR221C	0.0721772	-0.234934	0.165356
YFR017C	-0.012307	-0.184378	0.396894		YJL106W	4.14239	-0.604403	0.16791
YPL227C	-0.368446	0.021437	0.407111		YPL023C	-1.27901	0.0579985	0.169215
YER066W	-2.94078	0.594	0.430331		YBR132C	-0.610435	-0.295858	0.171579
YKL183W	0.316001	-0.635458	0.443278		YBR162C	-0.398025	-0.0812574	0.172492
YKL163W	-0.753081	0.00652134	0.446406		YPR125W	0.423574	-0.309442	0.17416
YEL030W	-1.20051	-0.478039	0.446506		YDR397C	-0.350897	-0.340163	0.174371
YHL016C	-0.360339	-0.108202	0.449242		YLR113W	-1.14552	0.127922	0.176053
YER081W	-0.754554	-0.401639	0.451324		YDR377W	-0.292568	-0.193255	0.176331
YJL139C	-0.100699	0.0618849	0.456589		YDR074W	0.426004	0.280067	0.182605
YHR044C	-1.17585	-0.164958	0.457166		YCR008W	-0.53927	-0.261516	0.182733
YDR483W	-1.83303	-0.290097	0.458563		YEL034W	0.00978551	-0.0203073	0.185416
YNR055C	-0.947541	-0.0545809	0.463047		YML038C	-0.82874	-0.257076	0.18932
YPR067W	-0.51928	0.102421	0.469755		YGR036C	-1.08856	-0.301571	0.191349
YGL246C	-0.202422	-0.139234	0.479528		YLR425W	0.768514	0.144062	0.192666
YER053C	0.438564	-0.0499096	0.485079		YDR077W	0.721984	0.0877616	0.195391
YHR204W	-2.34186	-0.13684	0.498181		YPR035W	0.87502	0.284607	0.196882
YNL063W	-1.21287	-0.150474	0.516527		YLR224W	-1.18151	-0.666418	0.201141
YOR185C	0.365449	0.0492239	0.517985		YGL206C	0.0702769	0.0942238	0.204387
YPL076W	0.245095	-0.115284	0.518814		YBL017C	-1.70926	-0.148798	0.205921
YGL101W	0.202112	-0.126639	0.527289		YIL028W	-1.76747	0.330274	0.207344
YDR441C	-0.467825	-0.698429	0.539039		YER110C	-0.715752	-0.073661	0.208537
YPR013C	0.0879464	-0.358003	0.552916		YHR162W	1.11169	-0.229649	0.209056
YJR082C	-0.128297	-0.214853	0.559139		YHR142W	-0.302234	-0.157942	0.209176
YMR180C	-0.16073	-0.348435	0.566001		YBR182C	1.21054	0.0938905	0.213033
YOR062C	0.309026	0.14749	0.567972		YFR033C	-0.656864	0.29738	0.214581
YGR168C	-0.25489	0.237709	0.570909		YHR050W	-0.416529	0.103647	0.215386
YNL142W	-1.25603	0.175342	0.617191		YGR086C	0.920329	0.103578	0.216648
YBR291C	-0.679036	0.073079	0.656675		YBR121C	0.350031	0.0245338	0.216936
YLR046C	2.60212	1.29571	0.669006		YBR043C	0.0560179	0.139034	0.219245
YMR010W	-2.04209	-0.216586	0.675492		YKL164C	0.66863	0.0228184	0.21971
YKR039W	-1.20181	-0.162133	0.67783		YDL081C	-0.186757	-0.250327	0.221015
YPR127W	-0.675248	0.132097	0.721474		YOR270C	-0.513643	-0.147212	0.221739
YIL029C	0.424086	-0.82075	0.724506		YPR165W	0.660493	0.0250606	0.226514
YPR109W	-0.430218	0.0411337	0.775649		YDR225W	0.661184	-0.173571	0.235178
YMR034C	-0.509681	-1.04436	0.794419		YDL234C	0.194444	0.0421011	0.23904
YGL006W	-0.318179	-0.0875488	0.823618		YKL216W	0.227666	0.0159761	0.239687
YBR008C	-1.1943	-2.63624	0.934239		YER055C	0.890064	-0.0664575	0.241401
YMR040W	-0.0897895	-0.364929	0.967959		YIL039W	-1.64823	0.122963	0.241522
YBR208C	-1.71054	-0.228088	1.00036		YOR153W	0.641203	-0.0894627	0.242613
YKL165C-A	1.85686	0.973349	1.0007		YMR148W	0.551126	-0.378783	0.24531
YOR306C	0.180094	-2.92293	1.08279		YPL004C	0.930445	0.00598773	0.245534
YAR023C	1.72039	3.61066	1.10034		YFL039C	-0.143468	-0.175646	0.255456
YPR157W	-1.81445	-0.18792	1.12601		YOR008C	-0.448877	-0.17326	0.256645
YJL025W	-0.78482	-0.0992843	1.16286		YCR069W	-1.11358	-0.182603	0.259222
YER103W	-2.21365	-0.232198	1.46982		YJL159W	0.958621	0.0946078	0.262965
YEL028W	-3.64631	-1.19327	1.63686		YBL045C	0.648253	0.0416242	0.26419
YGR289C	-2.50213	0.212377	2.39956		YLR048W	0.679812	-0.174129	0.27279
YIR031C	-1.61237	0.41615	2.44318		YNR074C	0.0120182	-0.11661	0.274416
YOL014W	-1.50068	-2.01686	2.6869		YHR051W	0.18928	-0.0843934	0.279617
YJL213W	-3.01167	-0.808816	2.69075		YOR382W	1.00867	-0.814143	0.279685
YFL050C	-4.10636	1.81406	3.17428		YDR072C	-0.610493	0.122454	0.29252
					YBR199W	-0.318097	0.0301876	0.295434
					YJL101C	-1.38854	-0.0099321	0.296357
					YGR260W	-0.551429	-0.0878761	0.309337
					YMR205C	-0.154442	-0.153262	0.309601
					YDR148C	0.1316	0.0452496	0.314964
					YEL013W	-0.555543	-0.0874856	0.317162
					YER091C	-0.274198	-0.0840924	0.322062
					YPL154C	-0.353742	-0.272245	0.323699
					YLR258W	-0.586921	-0.0630973	0.327719
					YJR139C	-0.177265	-0.169253	0.328416
					YBR196C	0.17662	-0.0669073	0.331904
					YNL291C	-1.04683	-0.127754	0.334709
					YNL131W	-0.102971	-0.0415732	0.336723
					YHR032W	-1.67868	-0.0599101	0.337386
					YPL221W	-1.21048	-0.302775	0.34026
					YOR130C	0.537454	0.162725	0.340656
					YGR189C	0.58035	-0.00858593	0.341188
					YCR068W	-0.723821	-0.154529	0.34542
					YML116W	1.03152	-0.159925	0.348068
					YHR183W	0.0663501	-0.0594757	0.350219
					YMR296C	-0.142741	0.21209	0.354716
					YLR120C	0.319714	-0.103311	0.355916
					YDR382W	0.525626	-0.0560859	0.356729
					YOL032W	-0.519332	-0.196565	0.357826
					YCR005C	0.329597	-0.334701	0.36066
					YNL104C	-0.368501	-0.165467	0.362369
					YDR380W	0.927772	-1.13951	0.362473
					YOR118W	0.208205	-0.00486915	0.376378
					YAL053W	-0.23942	-0.168276	0.376795
					YHR216W	0.156022	-0.0696786	0.378978
					YDR349C	-1.6154	-0.142116	0.3828
					YPR103W	0.685894	0.116658	0.388649
					YJL052W	-0.621618	-0.0895291	0.396591
					YLR229C	-0.488595	-0.123112	0.399775
					YER057C	-0.0876484	-0.197925	0.405684
					YMR267W	0.334801	-0.296654	0.410366
					YGR180C	0.104742	0.0262512	0.411005
					YDR062W	-0.53694	-0.1054	0.414113
					YPL177C	-0.093093	-0.151805	0.426599
					YGR247W	0.573186	-0.419381	0.43137
					YLR380W	-0.193669	0.246019	0.434907
					YLR089C	-1.66009	-0.131096	0.435054
					YKL183W	0.316001	-0.635458	0.443278
					YOR161C	-0.959412	-0.199604	0.450204
					YLR340W	1.32626	-0.0873965	0.452905
					YOR230W	0.407836	-0.022899	0.454553
					YKR093W	-0.28744	-0.0285456	0.461494
					YBL030C	-0.274989	-0.103809	0.465485
					YHR008C	-0.572445	-0.169319	0.477486
					YFR053C	-0.370397	0.052148	0.48045
					YHR082C	-0.582788	-0.357918	0.48464
					YLR347C	-0.447185	-0.0487522	0.486213
					YMR307W	-0.152801	-0.0289898	0.503737
					YDL190C	-0.662628	-0.116401	0.505294
					YLR414C	0.0735718	-0.23166	0.513816
					YNL063W	-1.21287	-0.150474	0.516527
					YGR205W	-0.00165749	-0.158203	0.522264
					YGL167C	-1.34862	-0.269285	0.540753
					YER139C	-0.39771	-0.0757593	0.555858
					YHR026W	-0.573713	-0.110401	0.579686
					YNL190W	-1.09144	0.0292322	0.593877
					YJL026W	-0.601191	-0.00349449	0.617631
					YLR368W	-0.515431	-0.154258	0.637124
					YHR209W	-0.474691	-0.59683	0.643356
					YMR010W	-2.04209	-0.216586	0.675492
					YCR021C	0.439322	0.0822902	0.80319
					YGL006W	-0.318179	-0.0875488	0.823618
					YCR102C	-2.0321	-0.488345	1.40088
					YIR031C	-1.61237	0.41615	2.44318
					YOL014W	-1.50068	-2.01686	2.6869

## Sheet: Fig 6Aiii
394 mRNAs w/ single negative AUG uORF	WT+SM/WT	eIF2AΔ/WT	eIF2AΔ+SM/WT+SM
YDL039C	1.38657	-2.33842	-1.1141
YNR056C	2.40938	-2.21829	0.0290857
YLR031W	-0.581363	-2.06165	0.875214
YGR154C	0.243757	-1.96414	-1.76464
YCR020C	-2.17795	-1.84068	1.12559
YCR064C	-2.54379	-1.49854	0.0727641
YML118W	0.907109	-1.4769	0.315641
YNR058W	-0.353122	-1.42057	-0.0143516
YGL117W	0.382619	-1.2111	0.0812909
YIR019C	4.35592	-1.05038	-1.7422
YMR034C	-0.509681	-1.04436	0.794419
YLR317W	1.21845	-0.999467	-2.22859
YKL093W	-2.45072	-0.993409	0.662746
YGR182C	-0.690062	-0.912295	0.255081
YCR007C	-1.07073	-0.884808	2.23291
YAL027W	-0.238188	-0.838907	0.254317
YHL026C	-0.630906	-0.831367	0.395601
YEL005C	0.310552	-0.790742	-0.181592
YNL003C	-1.15285	-0.742598	0.301732
YNL187W	0.403821	-0.722578	-0.145925
YMR195W	0.180084	-0.703127	0.113872
YOR366W	-1.3338	-0.693154	0.289858
YBR295W	0.612088	-0.656633	-0.255243
YJL161W	-0.844194	-0.621968	0.241005
YDR387C	-1.57857	-0.590226	0.36283
YOR231W	-1.17868	-0.584562	-0.198932
YDR131C	-0.145047	-0.574324	0.163431
YGL193C	0.164858	-0.551136	1.0308
YPL024W	-0.6596	-0.53639	0.423809
YNL128W	-0.411193	-0.536143	0.397767
YEL038W	-1.08552	-0.534716	0.282023
YDL177C	0.103037	-0.524453	0.325665
YKR061W	-0.793312	-0.523932	-0.419771
YOR193W	1.21343	-0.522687	-0.352776
YIL134W	-1.12814	-0.513213	0.65336
YML068W	1.49759	-0.5019	0.0181137
YOL140W	0.968026	-0.491874	0.232049
YGL136C	-0.308203	-0.486284	0.308306
YJL206C	-0.0582162	-0.484709	-0.0808872
YML023C	-1.2046	-0.479482	-0.00965952
YPL071C	-0.0910291	-0.477492	-0.725465
YGR053C	0.65256	-0.472466	-0.373551
YER015W	-0.398417	-0.466756	0.353658
YGL224C	-0.132371	-0.465294	-0.194103
YLL003W	0.2497	-0.458198	0.235434
YFL054C	-0.375643	-0.446676	0.378312
YFL027C	0.781912	-0.445133	-1.03931
YLR381W	-0.494434	-0.441077	-0.152393
YJL065C	0.416613	-0.429859	-0.00641216
YDL109C	-0.695299	-0.407949	-0.221895
YBL066C	-0.267161	-0.369629	-0.591182
YHR091C	-0.645124	-0.3696	-0.384822
YOR229W	-0.452478	-0.365761	0.332432
YBR028C	-0.160382	-0.359919	0.0226527
YBL060W	-0.135512	-0.359098	-0.147951
YOR188W	0.0526889	-0.345574	-0.798375
YPR192W	-0.0200363	-0.338629	-1.08762
YLR443W	-0.945451	-0.336769	-0.350474
YGL002W	-1.39006	-0.335363	0.065995
YPL067C	-0.137701	-0.331979	0.0314079
YDR435C	-0.728628	-0.319529	0.270239
YML009C	0.963541	-0.305587	0.00931777
YJR135C	0.46619	-0.28726	0.0590062
YER028C	0.688483	-0.271966	-0.109184
YBR128C	0.16256	-0.270231	0.367225
YDR421W	-0.220457	-0.268918	-0.126608
YPR200C	-1.20921	-0.265952	0.524781
YDR277C	0.527945	-0.26194	0.0625726
YGL143C	-0.360513	-0.249475	-0.0949072
YMR176W	-1.76268	-0.249164	0.152795
YOR073W	-0.278466	-0.246044	-0.0924983
YMR270C	0.03026	-0.239694	-0.484849
YPL175W	0.74307	-0.226658	0.220088
YNR010W	-0.342487	-0.219778	0.150243
YDR362C	0.288578	-0.214484	-0.0809646
YKR044W	-1.00941	-0.20395	0.11326
YDR084C	-0.351489	-0.203713	0.132974
YHR194W	-0.85868	-0.197745	0.173409
YKL019W	-1.62174	-0.191964	0.353237
YKL053C-A	0.599521	-0.189889	-0.682827
YNL294C	-1.76544	-0.184395	0.384794
YDR459C	-1.56257	-0.183186	0.547822
YOL086W-A	-0.000388685	-0.182889	-0.736922
YFR039C	-1.13499	-0.179125	0.273635
YKL050C	2.54188	-0.177639	-0.717766
YMR127C	0.062902	-0.17756	-0.552075
YDR207C	-0.51166	-0.172591	-0.333413
YML087C	-0.0989561	-0.167927	0.93102
YGL194C	0.0657498	-0.16509	0.107985
YMR112C	1.06703	-0.16314	-0.24371
YDR046C	0.0655691	-0.161484	-0.0218744
YLR107W	0.498556	-0.161476	0.333387
YIR016W	-1.68014	-0.160838	0.720439
YFL001W	0.0530123	-0.158867	-0.140882
YLR383W	0.161292	-0.15138	-0.374656
YIR035C	-1.17754	-0.147448	0.469164
YMR042W	-0.392944	-0.146949	-0.095722
YGL162W	-0.09974	-0.13989	-0.229814
YKL149C	-0.772212	-0.136714	-0.0327084
YKR038C	-1.08811	-0.126876	-0.15262
YOR030W	0.598175	-0.123716	-0.0462846
YDR069C	-0.404608	-0.122352	-0.0796175
YOL138C	-0.548159	-0.122183	-0.176798
YCR019W	0.0200506	-0.122077	0.180358
YGR169C	0.48158	-0.121004	-0.0242705
YPR085C	0.265649	-0.117076	-0.221304
YCR106W	0.168103	-0.116396	-0.37103
YHR032W-A	0.0707457	-0.115778	0.0368062
YDR313C	-0.0149271	-0.111004	-0.0977431
YDL113C	-0.626801	-0.110131	-0.344987
YMR172W	-0.0891157	-0.108277	-0.282
YMR203W	-0.307148	-0.106217	0.211184
YCR107W	2.90253	-0.105859	0.955556
YNR027W	-0.828161	-0.102479	-0.46065
YOL075C	-0.659067	-0.102145	-0.169222
YBR187W	-0.983896	-0.101227	0.240459
YHR076W	-0.13133	-0.100019	-0.117175
YPL176C	-0.483985	-0.0967285	-0.448842
YOR174W	-0.341537	-0.0941616	-0.780408
YJR051W	-0.678237	-0.0927596	0.455568
YJL154C	-0.444222	-0.085124	0.238151
YLR105C	-1.19638	-0.0828232	-0.177241
YKR021W	0.74935	-0.081141	-0.0117941
YOL055C	-0.740724	-0.0796413	0.218071
YER139C	-0.39771	-0.0757593	0.555858
YNL083W	0.225437	-0.0747432	-0.0524263
YLR146C	-0.612226	-0.0745108	0.296653
YDR452W	-0.738272	-0.0720133	0.0561157
YHR039C	-0.25292	-0.0673862	0.172896
YDL238C	0.373487	-0.0668658	-0.0644727
YKR004C	-0.292705	-0.0655187	0.0929053
YDL090C	-0.102352	-0.0613082	0.150205
YDR305C	1.15969	-0.0588864	-0.0129665
YLR242C	-0.434735	-0.0584039	0.201988
YKL186C	1.05064	-0.0533345	0.0796096
YJR130C	1.50686	-0.0527382	-0.0398986
YIL047C	-1.86997	-0.0523626	0.131585
YDR472W	-1.10319	-0.0518696	0.0369941
YBR007C	0.30855	-0.0490674	-0.488435
YNL048W	-1.1691	-0.0486086	0.267989
YGR262C	-0.546252	-0.0470638	0.0660482
YNL186W	0.00208029	-0.0438519	-0.577855
YDL138W	0.696435	-0.0411785	0.258192
YOR054C	0.375128	-0.0401524	-0.0833228
YLR078C	-1.18163	-0.0388412	-0.52302
YOR110W	-0.197393	-0.0388005	-0.494306
YGR071C	0.431848	-0.0383353	-0.247685
YDL244W	0.186629	-0.0311428	-0.0542501
YNL103W	0.0050537	-0.0297365	-0.773418
YMR137C	0.226687	-0.0258552	-0.153072
YOR031W	0.856314	-0.0247946	-1.22643
YDR038C	0.0019307	-0.0247544	0.162896
YNL056W	0.156241	-0.0207333	-0.285705
YLR164W	-1.39256	-0.0197752	-0.385621
YMR274C	-0.441488	-0.0197714	0.367484
YBL020W	-2.35683	-0.0165778	0.143538
YFL029C	0.453793	-0.0160289	0.0594271
YLR097C	-0.222213	-0.0143745	-0.72129
YKR019C	-0.826872	-0.0131077	0.14721
YDR073W	0.159501	-0.0105646	-0.824833
YLR324W	-0.503183	-0.0104046	-0.179388
YIL085C	-2.09334	-0.0098238	0.226677
YLR284C	-0.663473	-0.00932169	0.330242
YNR032W	-0.428294	-0.00851832	-0.189768
YIL128W	-0.175884	-0.00755283	-0.372935
YAL014C	-0.460711	-0.00680569	0.124923
YNL311C	-0.1182	-0.00674749	0.0645878
YOL083W	0.674323	-0.00296445	0.0102428
YOR160W	0.1783	0.00480028	-0.102108
YDR306C	1.30639	0.00597163	-0.165276
YFR027W	1.56879	0.00752327	-0.592589
YML104C	-0.773897	0.0108094	-0.472903
YPL064C	1.43439	0.0117166	-0.215432
YHL028W	0.365994	0.0192403	-0.0649281
YJL046W	-0.0829355	0.0198033	-0.368384
YOR350C	0.363779	0.0224432	0.203743
YMR293C	0.692073	0.0264053	0.00607142
YIL132C	-0.0102082	0.0270463	-0.378931
YNL065W	0.142643	0.0283449	0.148734
YJR030C	0.714447	0.0290564	-0.255033
YPL114W	-1.23023	0.0295315	0.121698
YGR166W	0.234019	0.0301472	-0.00488857
YFR005C	-0.265367	0.0304131	0.20605
YPL029W	0.500052	0.0305621	0.622123
YAR027W	-0.175977	0.0344166	0.467885
YGR004W	-0.0528424	0.0393689	-0.189325
YPR109W	-0.430218	0.0411337	0.775649
YDL169C	0.655004	0.0416173	1.18209
YBL009W	0.922405	0.0417371	-0.257836
YBL057C	-0.029055	0.0431285	-0.210546
YPL168W	0.456524	0.0458413	-0.157896
YER041W	-0.0783757	0.0463863	0.0395824
YMR282C	-0.622777	0.0471523	0.0456822
YBR163W	-1.06793	0.0498801	0.172062
YKL120W	0.540736	0.0511466	-0.0237139
YBR044C	-0.299909	0.0563782	-0.174806
YMR234W	0.475496	0.0575566	-0.0957157
YGR170W	0.165294	0.0633595	-0.00905494
YMR182C	-0.0396091	0.0641316	0.269492
YCL036W	-0.459848	0.0682317	0.176904
YGR067C	-1.17394	0.0696171	-0.513024
YLR127C	-0.675654	0.0706891	0.449582
YBR291C	-0.679036	0.073079	0.656675
YGR238C	0.0803946	0.0745598	0.043918
YPL193W	0.391178	0.078459	0.0652202
YHR127W	0.22577	0.0836173	0.0635881
YNL021W	0.202255	0.0867468	0.034116
YGR216C	-0.415288	0.0926998	-0.524603
YPR054W	1.38003	0.0936923	1.7761
YOL017W	0.114062	0.094375	0.101257
YLR188W	-0.259471	0.0945726	-0.00974722
YDR444W	0.207165	0.0950444	-0.239018
YER171W	-0.0109956	0.0950821	-0.243987
YKR089C	0.630142	0.099056	0.165138
YPR067W	-0.51928	0.102421	0.469755
YOL063C	-0.845993	0.103546	-0.157883
YHR050W	-0.416529	0.103647	0.215386
YPL242C	0.787241	0.103869	-0.015312
YDR318W	0.690205	0.10859	-0.159836
YDL164C	-1.17102	0.110097	0.16687
YDL027C	0.449523	0.110952	-0.257073
YKR022C	1.04346	0.112013	-0.579922
YJR040W	-0.471858	0.116267	0.18873
YDR164C	-0.550075	0.117324	0.0435094
YLR239C	-0.0949242	0.119329	-0.187165
YCL011C	0.157066	0.120488	-0.163848
YAL028W	-0.238106	0.121189	0.308429
YGL175C	0.0893384	0.122809	-0.361168
YJL047C	0.10047	0.125527	-0.0349726
YLR376C	0.28421	0.128096	0.00355595
YHR153C	0.823057	0.128257	-0.0542475
YHL010C	0.606073	0.128423	-0.257562
YIR021W	0.808417	0.129075	-0.726292
YLR360W	-0.0701469	0.131412	-0.00806397
YLR408C	0.781397	0.13435	-0.457221
YGL169W	0.142192	0.134442	-0.130677
YDR371W	-0.286428	0.136898	-0.128964
YJR127C	-0.818855	0.144763	-0.103008
YLR104W	-0.0315619	0.144781	-0.00868138
YDR470C	-0.195271	0.150413	0.0828309
YLL043W	-0.00582586	0.150575	-0.0733844
YAL020C	-1.63588	0.151705	-0.642884
YIL154C	0.953808	0.156085	0.140064
YJR089W	-0.288183	0.15929	-0.446457
YMR135C	-1.02863	0.164581	0.312305
YBR114W	1.09454	0.165199	-0.338305
YLR072W	-1.30505	0.169701	-0.43966
YPL022W	-0.150853	0.175185	-0.067723
YDL133W	0.112994	0.182435	-0.0268834
YDR514C	-0.0402618	0.1838	-0.349518
YHR046C	-0.595854	0.184462	-0.0670847
YMR197C	0.818485	0.185436	-0.0144112
YNL191W	0.146003	0.186126	0.342622
YDR299W	1.35086	0.188978	-0.226527
YBR074W	-1.07342	0.191238	0.519756
YIR003W	0.982205	0.19647	-0.230973
YMR114C	0.877216	0.196519	-0.666647
YPL255W	0.503051	0.199511	0.100581
YLR253W	-0.646352	0.202342	0.327727
YLL054C	-1.16564	0.203405	-0.79854
YPR173C	0.224456	0.211381	-0.281942
YML025C	1.12454	0.213457	0.0254373
YDR179W-A	0.459325	0.215333	0.460824
YDR137W	0.136184	0.218047	-0.434559
YNL217W	0.235856	0.218116	-0.331776
YMR224C	0.392537	0.225754	-0.189412
YBR108W	0.572737	0.235175	-0.325917
YGR168C	-0.25489	0.237709	0.570909
YBR152W	0.937627	0.244462	-0.572539
YGR217W	0.346636	0.248432	-0.0449871
YDR466W	0.490357	0.248697	-0.572874
YMR033W	0.485751	0.249611	0.127219
YEL036C	-1.41434	0.260672	0.163681
YIL017C	-0.669156	0.262692	-0.0311016
YKL198C	0.741816	0.266672	0.174333
YHR060W	1.27632	0.271325	-0.38066
YPL007C	-0.409715	0.271681	0.0239372
YMR258C	-0.00775088	0.280235	0.123794
YMR026C	-0.793885	0.287419	-0.217543
YLR313C	1.69274	0.295282	-0.666942
YOR390W	-0.0229159	0.300179	-0.207005
YLR451W	0.380377	0.300737	-0.105125
YDR439W	0.44175	0.30134	-0.235896
YNL273W	-0.0231319	0.304205	-0.238677
YCR073C	0.258309	0.305027	0.215486
YLR011W	-0.19247	0.307486	0.599342
YLR126C	1.12826	0.3132	0.0754641
YER162C	1.31245	0.317412	-0.0845219
YKL082C	1.21513	0.318005	-1.03292
YBL018C	1.12556	0.319539	-0.112964
YNL029C	-1.21106	0.322595	0.26329
YBR213W	1.17051	0.322601	-0.225715
YOR115C	0.550032	0.323194	0.143863
YDR003W-A	1.43536	0.327234	-1.1355
YHR155W	-1.17463	0.332132	-0.0218081
YOR305W	0.850247	0.333142	-0.325804
YHR114W	0.630836	0.335921	-0.180033
YBL014C	-0.59743	0.336219	-0.0563912
YGL003C	-0.586118	0.34361	-0.0486368
YDR423C	1.36089	0.357739	-0.134336
YIL159W	1.3774	0.360587	0.0261353
YHR150W	0.0406095	0.36907	-0.374463
YDR123C	-0.352439	0.379552	-0.806303
YNL257C	0.161065	0.389171	0.00723369
YGR287C	-1.39366	0.390992	0.0166248
YNL042W	0.417243	0.39301	-0.638432
YDL176W	-0.0456127	0.393135	-0.252811
YCR032W	0.583534	0.394981	0.0499625
YJL090C	0.246329	0.410939	0.127572
YIR031C	-1.61237	0.41615	2.44318
YBR239C	0.939987	0.419197	0.128757
YDR473C	0.979719	0.421084	-0.096995
YMR094W	0.629365	0.431849	-0.685185
YPL164C	1.20443	0.432084	-0.636015
YOR295W	0.619514	0.436109	-0.144101
YDR163W	0.608866	0.438183	-0.690279
YOR219C	-0.42681	0.446734	0.083129
YIL031W	0.287329	0.448444	0.441758
YOR172W	-0.323896	0.451792	0.513151
YGR096W	-0.551753	0.460493	1.04151
YOL125W	0.154647	0.465127	0.101292
YJR141W	-0.643187	0.516435	0.368604
YBR255W	1.24637	0.52448	-0.240457
YLR211C	0.460905	0.530541	-0.314886
YOR284W	-0.670879	0.536592	0.407056
YGL194C-A	-0.169995	0.540881	0.600952
YDL200C	1.38729	0.543573	-0.125659
YEL064C	0.273639	0.611346	0.237736
YPL083C	0.172901	0.630337	-0.130889
YDR242W	2.89149	0.632491	-0.263934
YPL268W	0.582036	0.648483	0.164918
YGR221C	0.804213	0.673565	0.605737
YPL209C	0.962975	0.702649	-0.0771653
YLR233C	0.906358	0.714172	-0.0339968
YGL131C	0.13719	0.719544	-0.223319
YNL254C	-0.563714	0.742139	0.360329
YOR318C	-1.80881	0.902207	-0.874751
YKL165C-A	1.85686	0.973349	1.0007
YMR103C	-0.0506039	1.00477	0.536923
YPL167C	1.7311	1.3006	-0.257145
YMR151W	1.4325	1.42686	-1.28776
YHR211W	2.63805	2.36449	0.750754
YBR063C	4.3305	3.2708	-0.854482
