# Supplementary material for: Yeast eIF2A has a minimal role in translation initiation and uORF-mediated translational control in vivo
Source: eLife. 2024 Jan 24;12:RP92916. doi: 10.7554/eLife.92916 (PMC10945734; doi:10.7554/eLife.92916)
Supplement: Figure 6—source data 3. [file elife-92916-fig6-data3.xlsx]

## Sheet: Fig 6Ci
	AUG-uORF mRNAs (N=55)
gene	eIF2AΔ+SM/WT+SM	WT+SM/WT	eIF2AΔ/WT
YJR004C	-3.01255	-0.295595	-1.90512
YDR366C	-2.24994	2.15833	1.12153
YHR157W	-2.18302	0.373229	-3.44075
YPL148C	-1.73778	1.08258	0.74036
YBL039W-B	-1.64809	-0.443013	0.0172445
YDR052C	-1.54572	0.753345	0.230667
YKL161C	-1.35299	0.888253	0.512394
YOR180C	-1.2406	2.12056	-2.02096
YPL034W	-1.19899	2.66687	1.37712
YGR122C-A	-1.15121	2.87011	0.013789
YGL158W	-1.10075	1.72849	0.953844
YCR045W-A	-1.05378	0.524144	-0.217346
YCL029C	-1.01257	-0.846142	-0.028239
YEL072W	-1.00917	0.358493	-0.0397957
YML043C	-0.962007	0.718065	-0.735597
YGR024C	-0.906673	-2.29934	-0.227059
YDL053C	-0.893639	0.261495	-0.131636
YDR073W	-0.824833	0.159501	-0.0105646
YDR123C	-0.806303	-0.352439	0.379552
YOR188W	-0.798375	0.0526889	-0.345574
YMR320W	-0.776584	-0.566867	-0.219679
YKL005C	-0.767343	-0.07609	0.302961
YLR330W	-0.762384	0.567123	0.0754147
YPR167C	-0.740095	1.26535	-0.262025
YDR357C	-0.729274	0.311551	0.0250783
YHR135C	-0.729182	-0.57966	-0.127553
YLR263W	-0.72766	4.31109	2.33607
YPL071C	-0.725465	-0.0910291	-0.477492
YLR097C	-0.72129	-0.222213	-0.0143745
YBR253W	-0.712554	0.245201	-0.0569565
YGL256W	-0.708258	-2.16069	-0.433194
YKL053C-A	-0.682827	0.599521	-0.189889
YDR379C-A	-0.674765	-0.601589	-0.31039
YLR313C	-0.666942	1.69274	0.295282
YPR194C	-0.666047	0.638968	-0.0978007
YGL258W	-0.66348	-0.590551	-1.87512
YKR069W	-0.652729	1.3465	-0.301062
YML006C	-0.643823	0.534206	0.0471332
YAR008W	-0.642671	-0.396767	-0.119423
YNL042W	-0.638432	0.417243	0.39301
YPL164C	-0.636015	1.20443	0.432084
YPR018W	-0.628152	1.32511	0.152109
YFR027W	-0.592589	1.56879	0.00752327
YKR022C	-0.579922	1.04346	0.112013
YDR228C	-0.577958	-0.305636	-0.11216
YNL186W	-0.577855	0.00208029	-0.0438519
YMR255W	-0.575125	1.03986	0.108974
YOL036W	-0.561771	0.65408	0.013628
YJL140W	-0.557596	-0.374203	-0.237721
YOL018C	-0.545231	0.541565	0.0585224
YDL059C	-0.54487	0.282107	0.237466
YBR162W-A	-0.522085	0.232926	-0.0499282
YDL002C	-0.516112	-0.304922	0.116427
YMR239C	-0.511655	0.965469	0.0110439
YMR126C	-0.502945	0.308361	0.461979

## Sheet: Fig 6Cii
	NCC-uORF mRNAs (N=77)
gene	eIF2AΔ+SM/WT+SM	WT+SM/WT	eIF2AΔ/WT
YDR052C	-1.54572	0.753345	0.230667
YKL161C	-1.35299	0.888253	0.512394
YBL052C	-1.34973	0.0242139	-0.253944
YPL034W	-1.19899	2.66687	1.37712
YCR045W-A	-1.05378	0.524144	-0.217346
YKR058W	-1.03202	-0.116309	-0.406794
YGR156W	-1.02223	1.60878	0.151112
YMR198W	-0.984318	0.825657	-0.158198
YDL053C	-0.893639	0.261495	-0.131636
YGL049C	-0.880246	0.679893	0.186491
YPR185W	-0.844319	-0.586662	-0.194969
YDR159W	-0.844166	-0.117399	-0.0870585
YDR073W	-0.824833	0.159501	-0.0105646
YDR145W	-0.792772	0.647356	-0.1234
YDR515W	-0.774497	-0.130395	-0.247159
YNL103W	-0.773418	0.0050537	-0.0297365
YKL005C	-0.767343	-0.07609	0.302961
YDL203C	-0.752293	-0.083198	0.0876973
YMR190C	-0.744864	-0.0717203	-0.0247105
YDR227W	-0.730556	1.17392	-0.252721
YDR357C	-0.729274	0.311551	0.0250783
YHR135C	-0.729182	-0.57966	-0.127553
YPL032C	-0.725058	-1.12525	-0.258975
YOR198C	-0.717882	-0.320173	-0.0847485
YPL239W	-0.717626	0.809248	-0.154291
YOR324C	-0.716536	-1.88488	-0.310189
YGL256W	-0.708258	-2.16069	-0.433194
YDR113C	-0.69029	0.52	0.0294184
YLR009W	-0.686317	0.291797	0.131022
YKL053C-A	-0.682827	0.599521	-0.189889
YMR144W	-0.681051	0.438958	0.403437
YBR057C	-0.665613	-0.300467	-0.0603647
YBR282W	-0.660331	0.505412	-0.0672529
YDR389W	-0.656587	-0.113071	-0.0173225
YKR069W	-0.652729	1.3465	-0.301062
YKR099W	-0.648325	-0.70599	-0.311716
YML006C	-0.643823	0.534206	0.0471332
YAR008W	-0.642671	-0.396767	-0.119423
YIL122W	-0.642326	0.239269	-0.742278
YGR041W	-0.641319	-0.0962411	-0.225312
YBR172C	-0.641167	-0.748666	0.0568992
YNL042W	-0.638432	0.417243	0.39301
YHR149C	-0.633641	-0.702879	0.231356
YMR165C	-0.629992	0.337554	0.464401
YLR079W	-0.624417	-0.0344169	0.140458
YKL032C	-0.615699	0.847391	0.142248
YHR084W	-0.61292	-0.263727	-0.301657
YEL012W	-0.609709	1.01894	-0.273373
YJL110C	-0.599593	0.591042	0.121745
YJL168C	-0.596934	-1.01623	-0.0384761
YLR337C	-0.584038	0.831028	0.151142
YER111C	-0.582384	0.215994	-0.0170674
YPL181W	-0.578349	0.252592	0.169744
YKL092C	-0.578275	0.31306	-0.0611625
YNL186W	-0.577855	0.00208029	-0.0438519
YMR277W	-0.577271	-0.899674	0.00487878
YDL235C	-0.576891	-1.10132	-0.231164
YDR404C	-0.568115	-2.08686	-0.023447
YOL036W	-0.561771	0.65408	0.013628
YJL140W	-0.557596	-0.374203	-0.237721
YGR167W	-0.553378	0.548998	0.0814534
YML117W	-0.551169	-0.681844	0.0358181
YNL229C	-0.54986	0.445069	-0.093615
YDR460W	-0.544717	0.439901	-0.169779
YNL197C	-0.54433	-0.207412	-0.224645
YER002W	-0.544144	1.35816	0.190627
YBR059C	-0.543037	-0.554286	-0.0123767
YMR016C	-0.536589	-0.278065	-0.0616915
YJL176C	-0.528774	0.376713	0.270648
YLR254C	-0.516426	0.599716	-0.105512
YDR027C	-0.515552	-0.050987	-0.125374
YKL087C	-0.514774	-0.651211	-0.263641
YAR014C	-0.512141	-1.65524	-0.0946771
YMR006C	-0.511623	-1.62192	-0.293028
YMR080C	-0.507948	-0.530498	-0.165564
YPL190C	-0.505957	0.453859	0.0518774
YMR126C	-0.502945	0.308361	0.461979

## Sheet: Fig 6Ciii
394 mRNAs w/ single negative AUG uORF	eIF2AΔ+SM/WT+SM	WT+SM/WT	eIF2AΔ/WT
YLR317W	-2.22859	1.21845	-0.999467
YGR154C	-1.76464	0.243757	-1.96414
YIR019C	-1.7422	4.35592	-1.05038
YMR151W	-1.28776	1.4325	1.42686
YOR031W	-1.22643	0.856314	-0.0247946
YDR003W-A	-1.1355	1.43536	0.327234
YDL039C	-1.1141	1.38657	-2.33842
YPR192W	-1.08762	-0.0200363	-0.338629
YFL027C	-1.03931	0.781912	-0.445133
YKL082C	-1.03292	1.21513	0.318005
YOR318C	-0.874751	-1.80881	0.902207
YBR063C	-0.854482	4.3305	3.2708
YDR073W	-0.824833	0.159501	-0.0105646
YDR123C	-0.806303	-0.352439	0.379552
YLL054C	-0.79854	-1.16564	0.203405
YOR188W	-0.798375	0.0526889	-0.345574
YOR174W	-0.780408	-0.341537	-0.0941616
YNL103W	-0.773418	0.0050537	-0.0297365
YOL086W-A	-0.736922	-0.000388685	-0.182889
YIR021W	-0.726292	0.808417	0.129075
YPL071C	-0.725465	-0.0910291	-0.477492
YLR097C	-0.72129	-0.222213	-0.0143745
YKL050C	-0.717766	2.54188	-0.177639
YDR163W	-0.690279	0.608866	0.438183
YMR094W	-0.685185	0.629365	0.431849
YKL053C-A	-0.682827	0.599521	-0.189889
YLR313C	-0.666942	1.69274	0.295282
YMR114C	-0.666647	0.877216	0.196519
YAL020C	-0.642884	-1.63588	0.151705
YNL042W	-0.638432	0.417243	0.39301
YPL164C	-0.636015	1.20443	0.432084
YFR027W	-0.592589	1.56879	0.00752327
YBL066C	-0.591182	-0.267161	-0.369629
YKR022C	-0.579922	1.04346	0.112013
YNL186W	-0.577855	0.00208029	-0.0438519
YDR466W	-0.572874	0.490357	0.248697
YBR152W	-0.572539	0.937627	0.244462
YMR127C	-0.552075	0.062902	-0.17756
YGR216C	-0.524603	-0.415288	0.0926998
YLR078C	-0.52302	-1.18163	-0.0388412
YGR067C	-0.513024	-1.17394	0.0696171
