# Supplementary material for: Yeast eIF2A has a minimal role in translation initiation and uORF-mediated translational control in vivo
Source: eLife. 2024 Jan 24;12:RP92916. doi: 10.7554/eLife.92916 (PMC10945734; doi:10.7554/eLife.92916)
Supplement: Figure 6—source data 4. [file elife-92916-fig6-data4.xlsx]

## Sheet: Fig 6D
514 mRNAs with functional AUG- or NCC-uORFs that altered reporter expression by 1.41-fold (N=514)	∆TEeIF2A∆+SM/WT+SM_down* (N=17)	Overlap only of mRNAs with functional AUG- or NCC-uORFs (N=514) and ∆TEeIF2A∆+SM/WT+SM_down (N=17)
YPR085C	YBR112C	YFL027C
YKL169C	YDL053C	YKL082C
YPR012W	YDR026C	YLR330W
YIR019C	YDR052C
YEL074W	YDR145W
YMR293C	YDR420W
YIL029C	YFL027C
YKL149C	YGL049C
YDR305C	YGR156W
YGL007W	YHR164C
YOR295W	YJR047C
YPL261C	YKL082C
YOL063C	YKR023W
YDR131C	YLR330W
YAR073W	YMR198W
YLR408C	YOL006C
YJR127C	YPL105C
YOL140W
YMR103C
YBR114W
YGR154C
YLR011W
YKR044W
YBR074W
YIL134W
YPR192W
YGL131C
YBR295W
YOR350C
YIL132C
YPL164C
YLR313C
YDR318W
YHR150W
YDR082W
YDR306C
YDL231C
YPR200C
YDR396W
YPL214C
YDR371W
YGL136C
YPL167C
YKR022C
YGR287C
YGR169C
YMR114C
YML087C
YGR168C
YKL120W
YER139C
YNL048W
YEL075W-A
YJR155W
YPR130C
YGR262C
YNR058W
YHR032W-A
YOL055C
YMR127C
YMR042W
YLR242C
YOR219C
YBL020W
YER041W
YNL128W
YIR021W
YLR443W
YIR035C
YCR032W
YFL060C
YEL005C
YKR004C
YGR170W
YBL057C
YHL028W
YOL138C
YKR038C
YFR005C
YAL028W
YJR135C
YPL114W
YAL063C-A
YNL211C
YDR163W
YLR253W
YBL066C
YDR470C
YBR128C
YLR451W
YFL027C
YPL083C
YMR094W
YDR459C
YKL082C
YMR195W
YBR182C-A
YGR238C
YNR056C
YER015W
YMR151W
YML007C-A
YBR259W
YDR452W
YOL086W-A
YDR242W
YPL193W
YCL011C
YKR019C
YAR027W
YGL194C
YDL109C
YLR146C
YGR221C
YDR444W
YLR383W
YMR182C
YDR137W
YMR175W-A
YJL090C
YLR031W
YOR305W
YML023C
YLR126C
YOL125W
YPR170C
YLR211C
YMR315W-A
YLR111W
YGR096W
YPL071C
YOR008C-A
YNL083W
YIL047C
YDR299W
YJR030C
YGR259C
YPR159C-A
YLR105C
YGL169W
YCR096C
YOL083W
YOR193W
YMR034C
YJR130C
YDL027C
YNL029C
YMR137C
YER067C-A
YBL060W
YNL273W
YKL048C
YCL036W
YBR291C
YDR387C
YHR127W
YDR313C
YJL065C
YGR053C
YLR120W-A
YBR007C
YDR423C
YDR473C
YLR376C
YLL043W
YBL014C
YLR324W
YMR234W
YNL334C
YDL090C
YHR060W
YCR007C
YGL102C
YGL117W
YIR016W
YOR390W
YPR122W
YLR233C
YKL198C
YIL017C
YGR004W
YBR107C
YLL003W
YPL133C
YDR034C-A
YGL175C
YNR032W
YOL085W-A
YDL200C
YGL003C
YPR109W
YBL018C
YOL038C-A
YOR366W
YDL177C
YNL042W
YJR020W
YOL043C
YGL002W
YMR270C
YDR439W
YDR277C
YNL254C
YAL027W
YLR097C
YMR112C
YPL022W
YDL022C-A
YDR173C
YBR239C
YBR152W
YFR012W
YEL020C
YOR318C
YDR164C
YPR054W
YPR195C
YPL067C
YPL007C
YPL039W
YER078W-A
YBR028C
YNL065W
YCR073C
YNL003C
YMR274C
YDR179W-A
YDL244W
YPR197C
YJR141W
YHR050W
YHR204W
YMR258C
YLR360W
YPL174C
YKR021W
YIL031W
YOL075C
YHR194W
YKL019W
YHR153C
YLR078C
YPR173C
YDR514C
YOR030W
YFL029C
YCR020C
YDR003W-A
YDL238C
YPR099C
YKL165C-A
YJL161W
YEL038W
YPL068C
YML068W
YNL257C
YNL021W
YAL019W-A
YPL255W
YFR039C
YPL029W
YEL073C
YBR108W
YGL021W
YGR166W
YML025C
YBR163W
YNR027W
YGR067C
YDR069C
YGR057C
YIL085C
YAL020C
YML118W
YDL164C
YMR224C
YCR019W
YLR239C
YMR172W
YEL064C
YLL054C
YJR089W
YDL133W
YLR381W
YJR153W
YAL064W
YOR115C
YDL220C
YKR089C
YBR223W-A
YFL001W
YOR231W
YGL224C
YGL194C-A
YPL038W
YGR071C
YKL222C
YOR172W
YHR186C
YBL006W-A
YLL051C
YGR188C
YCL054W-A
YDL138W
YDL009C
YHR076W
YMR135C
YOR023C
YLR072W
YER171W
YNL311C
YOL053W
YOR160W
YKL194C
YLR374C
YLR188W
YOR054C
YGR257C
YDR249C
YOR284W
YDR314C
YBR012C
YPR067W
YBR044C
YDR466W
YLR189C
YER162C
YLR317W
YLR154W-C
YFR048W
YGL162W
YHR155W
YJR051W
YGL052W
YMR176W
YGR182C
YPL149W
YLR107W
YPL176C
YPL024W
YHR114W
YOR110W
YOR343C
YEL072W
YIR003W
YKL186C
YPR100W
YHL010C
YPL168W
YER028C
YBR253W
YLR104W
YKL050C
YOR073W
YHR048W
YDL039C
YNL230C
YIL092W
YAL014C
YLR164W
YPL152W-A
YMR245W
YHR129C
YDL125C
YNL191W
YHL026C
YLR284C
YDR038C
YCR023C
YJR045C
YIR031C
YOR188W
YKL106C-A
YGR217W
YPL064C
YIL128W
YHL014C
YGL193C
YHR039C
YCR107W
YNL056W
YPL175W
YNL186W
YGL143C
YFR027W
YCR064C
YHR091C
YER188C-A
YDR413C
YDR073W
YJL154C
YBR089W
YDL169C
YKL093W
YHR046C
YDR472W
YOR161C
YBL077W
YDR109C
YNL217W
YDL059C
YGR216C
YHR211W
YNR010W
YDL034W
YML104C
YPL209C
YOR174W
YMR033W
YOR229W
YCR106W
YMR192W
YNL165W
YPL268W
YER038W-A
YDR362C
YDR421W
YNL294C
YJL141C
YFL054C
YKR061W
YMR203W
YMR197C
YOR031W
YBR187W
YPL242C
YBL009W
YJL046W
YBR050C
YDR046C
YJR040W
YMR316C-B
YDL176W
YIL154C
YLR127C
YBR213W
YDL113C
YEL036C
YDR207C
YBR063C
YDR084C
YKL053C-A
YJL064W
YNL103W
YML009C
YHR002W
YJL047C
YBR255W
YDR123C
YMR282C
YLR174W
YPL015C
YJL206C
YNL335W
YDR435C
YPR059C
YNL187W
YMR026C
YIL159W
YGR294W
YOL069W
YOL017W
YHR135C
YER032W
YLR436C
YNL045W
YGL228W
YBR102C
YPL072W
YNL063W
YPL076W
YMR167W
YGL090W
YLR427W
YEL006W
YLL059C
YLR158C
YPL227C
YOR102W
YNL090W
YEL049W
YPL096C-A
YLR330W
YOR057W
YLR241W
YNL202W
YMR283C
YNL307C
YKL002W
YBR147W
YDR072C
YER151C
YOR090C
YBR276C
YNL203C
YBR132C
YPR002W
YBR200W
YLR365W
YPR204W
YNL295W
YLR160C
YBL094C
YLR014C
YHR021W-A
YOR029W
YKL026C
YAR031W
YBR105C
YLR053C
YAR008W
YDR248C
YDR208W
YLL033W
