# Supplementary material for: Yeast eIF2A has a minimal role in translation initiation and uORF-mediated translational control in vivo
Source: eLife. 2024 Jan 24;12:RP92916. doi: 10.7554/eLife.92916 (PMC10945734; doi:10.7554/eLife.92916)
Supplement: Figure 6—source data 5. [file elife-92916-fig6-data5.xlsx]

## Sheet: Annotated uORFs
uorf_name	Chromosome	Start	End	start_codon	Distance_from_5UTR_start	Distance_to_main_AUG	gene
near-YAL005C_17	chrI	141444	141476	ATC	17	-45	YAL005C
near-YAL005C_24	chrI	141440	141469	ATT	24	-38	YAL005C
near-YAL005C_40	chrI	141433	141453	ATT	40	-22	YAL005C
near-YAL012W_10	chrI	130753	130797	ATT	10	-45	YAL012W
near-YAL016W_19	chrI	124800	124838	GTG	19	-78	YAL016W
near-YAL017W_44	chrI	119901	119990	GTG	44	-323	YAL017W
near-YAL017W_113	chrI	119970	119990	TTG	113	-254	YAL017W
near-YAL023C_62	chrI	108552	108577	CTG	62	-26	YAL023C
near-YAL023C_74	chrI	108552	108565	GTG	74	-14	YAL023C
near-YAL026C_55	chrI	99705	99728	CTG	55	-31	YAL026C
near-YAL034C_112	chrI	82430	82474	CTG	112	-523	YAL034C
near-YAL036C_16	chrI	76153	76168	TTG	16	-16	YAL036C
near-YAL040C_170	chrI	67621	67671	ATC	170	-151	YAL040C
near-YAL040C_239	chrI	67521	67602	CTG	239	-82	YAL040C
near-YAL049C_29	chrI	52596	52632	ACG	29	-37	YAL049C
near-YAL053W_104	chrI	45862	45879	ACG	104	-36	YAL053W
near-YAL053W_82	chrI	45840	45897	ATA	82	-58	YAL053W
near-YAL053W_107	chrI	45865	45879	ATT	107	-33	YAL053W
near-YAL053W_47	chrI	45805	45840	ATT	47	-93	YAL053W
near-YAL053W_94	chrI	45852	45897	CTG	94	-46	YAL053W
near-YAL053W_14	chrI	45772	45795	TTG	14	-126	YAL053W
near-YAL061W_37	chrI	33395	33446	ATA	37	-52	YAL061W
near-YAL061W_52	chrI	33410	33446	ATA	52	-37	YAL061W
near-YAL061W_64	chrI	33422	33446	ATA	64	-25	YAL061W
near-YAL061W_73	chrI	33431	33446	TTG	73	-16	YAL061W
near-YAL064W-B_445	chrI	11757	11795	TTG	445	-288	YAL064W-B
near-YAR008W_78	chrI	158941	158964	ACG	78	-24	YAR008W
near-YAR014C_21	chrI	168956	169000	TTG	21	-129	YAR014C
near-YAR015W_60	chrI	169345	169368	AAG	60	-29	YAR015W
near-YAR015W_26	chrI	169311	169373	ATT	26	-63	YAR015W
near-YAR015W_51	chrI	169336	169368	TTG	51	-38	YAR015W
near-YAR023C_971	chrI	179943	179963	ATC	971	-143	YAR023C
near-YAR027W_43	chrI	183713	183736	ATA	43	-56	YAR027W
near-YBL022C_96	chrII	181276	181306	GTG	96	-31	YBL022C
near-YBL022C_72	chrII	181276	181330	TTG	72	-55	YBL022C
near-YBL026W_27	chrII	170578	170616	ATA	27	-44	YBL026W
near-YBL026W_51	chrII	170602	170616	CTG	51	-20	YBL026W
near-YBL030C_10	chrII	164019	164108	ATC	10	-111	YBL030C
near-YBL030C_37	chrII	164019	164081	ATT	37	-84	YBL030C
near-YBL030C_1	chrII	164019	164117	TTG	1	-120	YBL030C
near-YBL040C_22	chrII	142872	142889	TTG	22	-21	YBL040C
near-YBL041W_11	chrII	141222	141245	TTG	11	-24	YBL041W
near-YBL045C_16	chrII	135639	135686	ATA	16	-170	YBL045C
near-YBL045C_106	chrII	135549	135596	TTG	106	-80	YBL045C
near-YBL045C_81	chrII	135586	135621	TTG	81	-105	YBL045C
near-YBL045C_90	chrII	135586	135612	TTG	90	-96	YBL045C
near-YBL047C_115	chrII	132060	132086	CTG	115	-46	YBL047C
near-YBL047C_41	chrII	132143	132160	CTG	41	-120	YBL047C
near-YBL047C_127	chrII	132060	132074	GTG	127	-34	YBL047C
near-YBL047C_68	chrII	132101	132133	TTG	68	-93	YBL047C
near-YBL050W_61	chrII	125102	125123	ATC	61	-22	YBL050W
near-YBL050W_30	chrII	125071	125091	CTG	30	-53	YBL050W
near-YBL054W_90	chrII	117563	117587	CTG	90	-25	YBL054W
near-YBL054W_66	chrII	117539	117587	GTG	66	-49	YBL054W
near-YBL054W_99	chrII	117572	117587	TTG	99	-16	YBL054W
near-YBL067C_208	chrII	95937	95957	AGG	208	-75	YBL067C
near-YBL099W_170	chrII	36902	36970	AAG	170	-150	YBL099W
near-YBL099W_161	chrII	36893	36970	ACG	161	-159	YBL099W
near-YBL099W_41	chrII	36773	36853	ATA	41	-279	YBL099W
near-YBL099W_62	chrII	36794	36853	ATT	62	-258	YBL099W
near-YBL099W_248	chrII	36980	37000	TTG	248	-72	YBL099W
near-YBL099W_54	chrII	36786	36821	TTG	54	-266	YBL099W
near-YBL099W_68	chrII	36800	36853	TTG	68	-252	YBL099W
near-YBL099W_86	chrII	36818	36853	TTG	86	-234	YBL099W
near-YBL103C_156	chrII	23548	23634	ACG	156	-98	YBL103C
near-YBL103C_95	chrII	23645	23695	ATC	95	-159	YBL103C
near-YBL103C_132	chrII	23548	23658	GTG	132	-122	YBL103C
near-YBL105C_173	chrII	17733	17789	ATA	173	-93	YBL105C
near-YBR006W_38	chrII	246921	246962	ACG	38	-88	YBR006W
near-YBR006W_53	chrII	246936	246962	CTG	53	-73	YBR006W
near-YBR013C_330	chrII	265882	265910	ATT	330	-29	YBR013C
near-YBR015C_66	chrII	269527	269565	AGG	66	-62	YBR015C
near-YBR015C_59	chrII	269531	269572	CTG	59	-69	YBR015C
near-YBR016W_9	chrII	270225	270245	ATA	9	-21	YBR016W
near-YBR017C_35	chrII	273710	273730	TTG	35	-27	YBR017C
near-YBR024W_63	chrII	289394	289443	ATC	63	-50	YBR024W
near-YBR029C_53	chrII	297744	297779	CTG	53	-37	YBR029C
near-YBR029C_66	chrII	297743	297766	CTG	66	-24	YBR029C
near-YBR036C_22	chrII	310314	310339	ACG	22	-26	YBR036C
near-YBR036C_25	chrII	310314	310336	ATA	25	-23	YBR036C
near-YBR039W_68	chrII	315555	315573	ATT	68	-19	YBR039W
near-YBR039W_15	chrII	315502	315519	CTG	15	-72	YBR039W
near-YBR039W_49	chrII	315536	315568	TTG	49	-38	YBR039W
near-YBR049C_110	chrII	336840	336857	GTG	110	-39	YBR049C
near-YBR049C_100	chrII	336829	336867	TTG	100	-49	YBR049C
near-YBR049C_113	chrII	336840	336854	TTG	113	-36	YBR049C
near-YBR052C_22	chrII	339356	339394	ATA	22	-42	YBR052C
near-YBR052C_34	chrII	339356	339382	ATT	34	-30	YBR052C
near-YBR054W_247	chrII	343027	343068	ATA	247	-73	YBR054W
near-YBR054W_29	chrII	342809	342883	ATA	29	-291	YBR054W
near-YBR054W_38	chrII	342818	342883	ATA	38	-282	YBR054W
near-YBR054W_60	chrII	342840	342869	ATC	60	-260	YBR054W
near-YBR054W_16	chrII	342796	342864	ATT	16	-304	YBR054W
near-YBR054W_271	chrII	343051	343068	ATT	271	-49	YBR054W
near-YBR054W_17	chrII	342797	342883	TTG	17	-303	YBR054W
near-YBR057C_71	chrII	353294	353312	TTG	71	-19	YBR057C
near-YBR059C_137	chrII	360188	360200	ATT	137	-13	YBR059C
near-YBR059C_82	chrII	360196	360255	ATT	82	-68	YBR059C
near-YBR059C_113	chrII	360188	360224	CTG	113	-37	YBR059C
near-YBR059C_120	chrII	360200	360217	CTG	120	-30	YBR059C
near-YBR059C_101	chrII	360188	360236	TTG	101	-49	YBR059C
near-YBR059C_77	chrII	360188	360260	TTG	77	-73	YBR059C
near-YBR060C_13	chrII	362570	362593	TTG	13	-79	YBR060C
near-YBR060C_26	chrII	362515	362580	TTG	26	-66	YBR060C
near-YBR060C_33	chrII	362515	362573	TTG	33	-59	YBR060C
near-YBR067C_34	chrII	372736	372752	CTG	34	-17	YBR067C
near-YBR067C_11	chrII	372746	372775	TTG	11	-40	YBR067C
near-YBR069C_48	chrII	378470	378490	AAG	48	-57	YBR069C
near-YBR069C_39	chrII	378470	378499	CTG	39	-66	YBR069C
near-YBR072W_10	chrII	381965	382018	ATA	10	-64	YBR072W
near-YBR072W_25	chrII	381980	382018	ATT	25	-49	YBR072W
near-YBR078W_123	chrII	393069	393089	ATA	123	-53	YBR078W
near-YBR078W_116	chrII	393062	393082	ATC	116	-60	YBR078W
near-YBR078W_51	chrII	392997	393089	ATC	51	-125	YBR078W
near-YBR078W_58	chrII	393004	393024	ATT	58	-118	YBR078W
near-YBR078W_109	chrII	393055	393121	TTG	109	-67	YBR078W
near-YBR078W_133	chrII	393079	393121	TTG	133	-43	YBR078W
near-YBR082C_51	chrII	407170	407204	ATA	51	-35	YBR082C
near-YBR083W_215	chrII	409128	409154	ATA	215	-40	YBR083W
near-YBR085C-A_7	chrII	419166	419186	ATA	7	-22	YBR085C-A
near-YBR086C_172	chrII	423068	423160	ATA	172	-119	YBR086C
near-YBR086C_47	chrII	423157	423285	ATA	47	-244	YBR086C
near-YBR086C_187	chrII	423068	423145	ATC	187	-104	YBR086C
near-YBR086C_110	chrII	423157	423222	ATT	110	-181	YBR086C
near-YBR086C_260	chrII	423049	423072	ATT	260	-31	YBR086C
near-YBR086C_67	chrII	423194	423265	ATT	67	-224	YBR086C
near-YBR086C_79	chrII	423194	423253	ATT	79	-212	YBR086C
near-YBR086C_129	chrII	423138	423203	CTG	129	-162	YBR086C
near-YBR086C_200	chrII	423049	423132	TTG	200	-91	YBR086C
near-YBR086C_251	chrII	423049	423081	TTG	251	-40	YBR086C
near-YBR086C_59	chrII	423157	423273	TTG	59	-232	YBR086C
near-YBR096W_21	chrII	435980	436012	GTG	21	-40	YBR096W
near-YBR103W_13	chrII	447555	447569	TTG	13	-153	YBR103W
near-YBR104W_32	chrII	449610	449663	ATA	32	-56	YBR104W
near-YBR109C_8	chrII	458381	458398	AAG	8	-36	YBR109C
near-YBR120C_28	chrII	480952	480978	ATT	28	-55	YBR120C
near-YBR120C_21	chrII	480924	480985	TTG	21	-62	YBR120C
near-YBR121C_31	chrII	483390	483413	ACG	31	-46	YBR121C
near-YBR121C_34	chrII	483390	483410	ATT	34	-43	YBR121C
near-YBR121C_8	chrII	483368	483436	TTG	8	-69	YBR121C
near-YBR122C_20	chrII	484504	484516	TTG	20	-13	YBR122C
near-YBR125C_126	chrII	488419	488442	TTG	126	-62	YBR125C
near-YBR125C_51	chrII	488419	488517	TTG	51	-137	YBR125C
near-YBR126C_34	chrII	490427	490465	ACG	34	-73	YBR126C
near-YBR127C_18	chrII	492823	492868	ATT	18	-46	YBR127C
near-YBR132C_24	chrII	501538	501570	TTG	24	-128	YBR132C
near-YBR133C_94	chrII	504288	504352	TTG	94	-65	YBR133C
near-YBR135W_47	chrII	504806	504852	TTG	47	-47	YBR135W
near-YBR135W_62	chrII	504821	504852	TTG	62	-32	YBR135W
near-YBR151W_41	chrII	544922	544948	CTG	41	-105	YBR151W
near-YBR151W_53	chrII	544934	544948	CTG	53	-93	YBR151W
near-YBR151W_81	chrII	544962	545026	TTG	81	-65	YBR151W
near-YBR154C_28	chrII	549022	549072	ATT	28	-63	YBR154C
near-YBR154C_18	chrII	549068	549082	TTG	18	-73	YBR154C
near-YBR158W_23	chrII	556308	556325	ACG	23	-240	YBR158W
near-YBR158W_203	chrII	556488	556505	ATA	203	-60	YBR158W
near-YBR160W_38	chrII	560037	560076	GTG	38	-40	YBR160W
near-YBR160W_3	chrII	560002	560061	TTG	3	-75	YBR160W
near-YBR161W_63	chrII	561469	561516	TTG	63	-164	YBR161W
near-YBR162C_116	chrII	564571	564590	ACG	116	-20	YBR162C
near-YBR162C_28	chrII	564580	564678	ATC	28	-108	YBR162C
near-YBR162C_3	chrII	564590	564703	ATC	3	-133	YBR162C
near-YBR164C_32	chrII	568445	568513	ACG	32	-87	YBR164C
near-YBR164C_68	chrII	568445	568477	ATA	68	-51	YBR164C
near-YBR164C_19	chrII	568503	568526	TTG	19	-100	YBR164C
near-YBR172C_34	chrII	581429	581449	ATT	34	-77	YBR172C
near-YBR187W_101	chrII	602605	602632	ATA	101	-28	YBR187W
near-YBR187W_53	chrII	602557	602577	TTG	53	-76	YBR187W
near-YBR188C_27	chrII	604108	604155	ATC	27	-48	YBR188C
near-YBR192W_65	chrII	607508	607609	CTG	65	-143	YBR192W
near-YBR192W_80	chrII	607523	607609	CTG	80	-128	YBR192W
near-YBR192W_111	chrII	607554	607613	TTG	111	-97	YBR192W
near-YBR194W_17	chrII	609985	610036	ATC	17	-52	YBR194W
near-YBR194W_42	chrII	610010	610036	ATT	42	-27	YBR194W
near-YBR196C_22	chrII	613903	613920	ATC	22	-20	YBR196C
near-YBR196C_4	chrII	613903	613938	TTG	4	-38	YBR196C
near-YBR200W_24	chrII	620840	620870	GTG	24	-31	YBR200W
near-YBR201W_43	chrII	623482	623562	ATA	43	-93	YBR201W
near-YBR201W_49	chrII	623488	623562	TTG	49	-87	YBR201W
near-YBR208C_397	chrII	642240	642260	ATA	397	-50	YBR208C
near-YBR208C_63	chrII	642568	642594	ATA	63	-384	YBR208C
near-YBR211C_4	chrII	647147	647185	TTG	4	-53	YBR211C
near-YBR212W_82	chrII	647561	647650	ATA	82	-324	YBR212W
near-YBR212W_332	chrII	647811	647884	ATT	332	-74	YBR212W
near-YBR212W_91	chrII	647570	647650	ATT	91	-315	YBR212W
near-YBR212W_20	chrII	647499	647525	CTG	20	-386	YBR212W
near-YBR212W_203	chrII	647682	647705	CTG	203	-203	YBR212W
near-YBR212W_34	chrII	647513	647650	CTG	34	-372	YBR212W
near-YBR212W_193	chrII	647672	647734	GTG	193	-213	YBR212W
near-YBR212W_211	chrII	647690	647734	TTG	211	-195	YBR212W
near-YBR214W_27	chrII	651362	651413	ATA	27	-52	YBR214W
near-YBR214W_36	chrII	651371	651413	ATA	36	-43	YBR214W
near-YBR214W_46	chrII	651381	651413	ATA	46	-33	YBR214W
near-YBR214W_7	chrII	651342	651365	ATC	7	-72	YBR214W
near-YBR218C_1	chrII	662250	662310	TTG	1	-61	YBR218C
near-YBR221C_18	chrII	666373	666438	ACG	18	-185	YBR221C
near-YBR221C_85	chrII	666348	666371	ATC	85	-118	YBR221C
near-YBR221C_88	chrII	666348	666368	ATT	88	-115	YBR221C
near-YBR221C_146	chrII	666254	666310	TTG	146	-57	YBR221C
near-YBR235W_36	chrII	686855	686875	TTG	36	-45	YBR235W
near-YBR242W_1	chrII	704530	704562	TTG	1	-139	YBR242W
near-YBR248C_33	chrII	716477	716491	ATT	33	-26	YBR248C
near-YBR249C_30	chrII	717995	718054	ATA	30	-60	YBR249C
near-YBR249C_45	chrII	717995	718039	ATA	45	-45	YBR249C
near-YBR276C_35	chrII	760077	760103	ATA	35	-60	YBR276C
near-YBR276C_47	chrII	760077	760091	TTG	47	-48	YBR276C
near-YBR282W_16	chrII	768217	768237	GTG	16	-22	YBR282W
near-YBR283C_66	chrII	770476	770493	ATA	66	-78	YBR283C
near-YBR283C_79	chrII	770416	770480	ATT	79	-65	YBR283C
near-YBR283C_52	chrII	770490	770507	TTG	52	-92	YBR283C
near-YBR283C_80	chrII	770450	770479	TTG	80	-64	YBR283C
near-YCL014W_68	chrIII	96239	96256	CTG	68	-41	YCL014W
near-YCL017C_56	chrIII	94271	94308	ATA	56	-38	YCL017C
near-YCL017C_44	chrIII	94271	94320	ATT	44	-50	YCL017C
near-YCL030C_9	chrIII	68358	68384	CTG	9	-51	YCL030C
near-YCL037C_41	chrIII	58679	58704	ATC	41	-26	YCL037C
near-YCL037C_20	chrIII	58679	58725	CTG	20	-47	YCL037C
near-YCL037C_34	chrIII	58679	58711	GTG	34	-33	YCL037C
near-YCL051W_101	chrIII	35685	35714	ATT	101	-179	YCL051W
near-YCR002C_23	chrIII	118357	118380	ACG	23	-32	YCR002C
near-YCR008W_37	chrIII	128024	128062	ATA	37	-445	YCR008W
near-YCR008W_215	chrIII	128202	128273	TTG	215	-267	YCR008W
near-YCR012W_12	chrIII	137717	137740	ATC	12	-28	YCR012W
near-YCR012W_9	chrIII	137714	137740	ATT	9	-31	YCR012W
near-YCR021C_73	chrIII	157108	157134	TTG	73	-27	YCR021C
near-YCR027C_138	chrIII	168004	168036	TTG	138	-37	YCR027C
near-YCR027C_75	chrIII	168004	168099	TTG	75	-100	YCR027C
near-YCR028C_66	chrIII	172425	172476	ATT	66	-52	YCR028C
near-YCR030C_47	chrIII	176439	176476	AAG	47	-38	YCR030C
near-YCR045W-A_84	chrIII	208217	208246	TTG	84	-533	YCR045W-A
near-YCR053W_19	chrIII	216674	216695	ACG	19	-22	YCR053W
near-YCR053W_28	chrIII	216683	216695	ATC	28	-13	YCR053W
near-YCR053W_9	chrIII	216664	216695	TTG	9	-32	YCR053W
near-YCR057C_4	chrIII	223229	223286	ATA	4	-58	YCR057C
near-YCR068W_86	chrIII	237145	237168	ATT	86	-68	YCR068W
near-YCR069W_41	chrIII	238948	238983	ATA	41	-106	YCR069W
near-YCR069W_14	chrIII	238921	238983	GTG	14	-133	YCR069W
near-YCR084C_197	chrIII	262453	262480	AAG	197	-28	YCR084C
near-YCR084C_113	chrIII	262453	262564	ATT	113	-112	YCR084C
near-YCR084C_68	chrIII	262453	262609	CTG	68	-157	YCR084C
near-YCR088W_14	chrIII	265035	265066	ACG	14	-32	YCR088W
near-YDL004W_29	chrIV	443014	443027	GTG	29	-14	YDL004W
near-YDL006W_117	chrIV	439704	439742	ATT	117	-204	YDL006W
near-YDL006W_95	chrIV	439682	439708	ATT	95	-226	YDL006W
near-YDL014W_22	chrIV	427242	427355	ATA	22	-121	YDL014W
near-YDL014W_112	chrIV	427332	427355	ATC	112	-31	YDL014W
near-YDL014W_42	chrIV	427262	427362	ATT	42	-101	YDL014W
near-YDL014W_57	chrIV	427277	427362	ATT	57	-86	YDL014W
near-YDL014W_67	chrIV	427287	427355	ATT	67	-76	YDL014W
near-YDL014W_93	chrIV	427313	427362	ATT	93	-50	YDL014W
near-YDL014W_28	chrIV	427248	427355	CTG	28	-115	YDL014W
near-YDL014W_87	chrIV	427307	427362	TTG	87	-56	YDL014W
near-YDL014W_94	chrIV	427314	427355	TTG	94	-49	YDL014W
near-YDL015C_37	chrIV	426937	426969	TTG	37	-35	YDL015C
near-YDL020C_182	chrIV	416709	416757	ATA	182	-49	YDL020C
near-YDL020C_116	chrIV	416782	416823	TTG	116	-115	YDL020C
near-YDL020C_191	chrIV	416709	416748	TTG	191	-40	YDL020C
near-YDL025C_83	chrIV	407278	407319	TTG	83	-113	YDL025C
near-YDL028C_77	chrIV	403376	403390	CTG	77	-99	YDL028C
near-YDL028C_97	chrIV	403332	403370	TTG	97	-79	YDL028C
near-YDL045C_16	chrIV	373673	373702	ATT	16	-94	YDL045C
near-YDL053C_140	chrIV	362257	362314	ATT	140	-58	YDL053C
near-YDL053C_162	chrIV	362263	362292	ATT	162	-36	YDL053C
near-YDL053C_174	chrIV	362263	362280	ATT	174	-24	YDL053C
near-YDL053C_109	chrIV	362304	362345	CTG	109	-89	YDL053C
near-YDL053C_130	chrIV	362304	362324	TTG	130	-68	YDL053C
near-YDL055C_68	chrIV	356778	356840	ATT	68	-81	YDL055C
near-YDL055C_21	chrIV	356861	356887	GTG	21	-128	YDL055C
near-YDL055C_71	chrIV	356778	356837	TTG	71	-78	YDL055C
near-YDL072C_41	chrIV	330448	330469	ATA	41	-22	YDL072C
near-YDL072C_26	chrIV	330448	330484	ATT	26	-37	YDL072C
near-YDL073W_22	chrIV	326448	326609	CTG	22	-164	YDL073W
near-YDL073W_73	chrIV	326499	326609	GTG	73	-113	YDL073W
near-YDL081C_23	chrIV	310123	310165	ATA	23	-43	YDL081C
near-YDL081C_53	chrIV	310123	310135	ATA	53	-13	YDL081C
near-YDL081C_6	chrIV	310132	310182	ATA	6	-60	YDL081C
near-YDL081C_16	chrIV	310152	310172	TTG	16	-50	YDL081C
near-YDL084W_52	chrIV	305120	305170	ACG	52	-116	YDL084W
near-YDL084W_110	chrIV	305178	305201	ATA	110	-58	YDL084W
near-YDL084W_99	chrIV	305167	305196	ATA	99	-69	YDL084W
near-YDL084W_147	chrIV	305215	305235	ATT	147	-21	YDL084W
near-YDL084W_87	chrIV	305155	305196	ATT	87	-81	YDL084W
near-YDL084W_58	chrIV	305126	305170	CTG	58	-110	YDL084W
near-YDL084W_11	chrIV	305079	305093	GTG	11	-157	YDL084W
near-YDL084W_26	chrIV	305094	305111	GTG	26	-142	YDL084W
near-YDL084W_119	chrIV	305187	305201	TTG	119	-49	YDL084W
near-YDL084W_29	chrIV	305097	305111	TTG	29	-139	YDL084W
near-YDL084W_69	chrIV	305137	305196	TTG	69	-99	YDL084W
near-YDL085C-A_29	chrIV	302671	302700	ATT	29	-30	YDL085C-A
near-YDL089W_256	chrIV	296776	296817	TTG	256	-43	YDL089W
near-YDL091C_58	chrIV	294775	294789	TTG	58	-30	YDL091C
near-YDL103C_42	chrIV	276582	276612	ATA	42	-31	YDL103C
near-YDL110C_33	chrIV	264965	264988	ATA	33	-24	YDL110C
near-YDL111C_43	chrIV	264122	264136	TTG	43	-26	YDL111C
near-YDL117W_58	chrIV	248341	248358	TTG	58	-239	YDL117W
near-YDL122W_131	chrIV	242470	242535	ATT	131	-81	YDL122W
near-YDL122W_125	chrIV	242464	242535	CTG	125	-87	YDL122W
near-YDL122W_155	chrIV	242494	242535	TTG	155	-57	YDL122W
near-YDL131W_1	chrIV	227357	227391	ACG	1	-35	YDL131W
near-YDL131W_17	chrIV	227373	227391	TTG	17	-19	YDL131W
near-YDL132W_197	chrIV	224200	224220	ATT	197	-103	YDL132W
near-YDL132W_198	chrIV	224201	224224	TTG	198	-102	YDL132W
near-YDL132W_239	chrIV	224242	224302	TTG	239	-61	YDL132W
near-YDL132W_60	chrIV	224063	224131	TTG	60	-240	YDL132W
near-YDL134C_382	chrIV	220828	220860	AAG	382	-89	YDL134C
near-YDL134C_69	chrIV	221090	221173	ACG	69	-402	YDL134C
near-YDL134C_313	chrIV	220828	220929	ATA	313	-158	YDL134C
near-YDL134C_367	chrIV	220828	220875	ATA	367	-104	YDL134C
near-YDL134C_148	chrIV	221074	221094	ATT	148	-323	YDL134C
near-YDL134C_21	chrIV	221090	221221	ATT	21	-450	YDL134C
near-YDL134C_337	chrIV	220828	220905	CTG	337	-134	YDL134C
near-YDL134C_178	chrIV	220960	221064	GTG	178	-293	YDL134C
near-YDL134C_355	chrIV	220828	220887	GTG	355	-116	YDL134C
near-YDL134C_421	chrIV	220804	220821	GTG	421	-50	YDL134C
near-YDL134C_123	chrIV	221090	221119	TTG	123	-348	YDL134C
near-YDL134C_170	chrIV	221025	221072	TTG	170	-301	YDL134C
near-YDL134C_309	chrIV	220913	220933	TTG	309	-162	YDL134C
near-YDL134C_401	chrIV	220821	220841	TTG	401	-70	YDL134C
near-YDL135C_14	chrIV	219289	219319	TTG	14	-31	YDL135C
near-YDL136W_12	chrIV	217578	217598	AAG	12	-21	YDL136W
near-YDL136W_6	chrIV	217572	217598	ACG	6	-27	YDL136W
near-YDL137W_22	chrIV	216077	216094	TTG	22	-451	YDL137W
near-YDL141W_197	chrIV	202996	203037	ATA	197	-42	YDL141W
near-YDL141W_199	chrIV	202998	203036	ATT	199	-40	YDL141W
near-YDL141W_131	chrIV	202930	203037	TTG	131	-108	YDL141W
near-YDL145C_176	chrIV	198177	198255	ATT	176	-79	YDL145C
near-YDL145C_44	chrIV	198331	198387	TTG	44	-211	YDL145C
near-YDL145C_6	chrIV	198390	198425	TTG	6	-249	YDL145C
near-YDL146W_74	chrIV	192632	192667	GTG	74	-117	YDL146W
near-YDL150W_10	chrIV	183256	183273	ATA	10	-86	YDL150W
near-YDL155W_99	chrIV	176741	176771	ATT	99	-31	YDL155W
near-YDL155W_102	chrIV	176744	176771	TTG	102	-28	YDL155W
near-YDL155W_45	chrIV	176687	176771	TTG	45	-85	YDL155W
near-YDL160C_106	chrIV	172079	172108	ATA	106	-178	YDL160C
near-YDL160C_144	chrIV	172050	172070	ATA	144	-140	YDL160C
near-YDL160C_237	chrIV	171936	171977	ATA	237	-47	YDL160C
near-YDL160C_228	chrIV	171936	171986	ATT	228	-56	YDL160C
near-YDL160C_10	chrIV	172190	172204	GTG	10	-274	YDL160C
near-YDL160C_58	chrIV	172079	172156	TTG	58	-226	YDL160C
near-YDL171C_70	chrIV	155787	155855	ATC	70	-215	YDL171C
near-YDL171C_65	chrIV	155795	155860	TTG	65	-220	YDL171C
near-YDL180W_21	chrIV	135784	135831	ATA	21	-111	YDL180W
near-YDL185W_33	chrIV	126721	126753	ATT	33	-65	YDL185W
near-YDL188C_134	chrIV	124999	125046	ATT	134	-48	YDL188C
near-YDL188C_115	chrIV	124999	125065	CTG	115	-67	YDL188C
near-YDL188C_154	chrIV	124999	125026	CTG	154	-28	YDL188C
near-YDL188C_86	chrIV	125047	125094	CTG	86	-96	YDL188C
near-YDL188C_109	chrIV	124999	125071	TTG	109	-73	YDL188C
near-YDL188C_130	chrIV	124999	125050	TTG	130	-52	YDL188C
near-YDL188C_145	chrIV	124999	125035	TTG	145	-37	YDL188C
near-YDL188C_77	chrIV	125047	125103	TTG	77	-105	YDL188C
near-YDL190C_46	chrIV	121704	121739	ATT	46	-147	YDL190C
near-YDL190C_104	chrIV	121658	121681	TTG	104	-89	YDL190C
near-YDL190C_141	chrIV	121624	121644	TTG	141	-52	YDL190C
near-YDL190C_64	chrIV	121704	121721	TTG	64	-129	YDL190C
near-YDL191W_3	chrIV	117644	117662	GTG	3	-19	YDL191W
near-YDL193W_42	chrIV	114606	114629	TTG	42	-65	YDL193W
near-YDL193W_94	chrIV	114658	114670	TTG	94	-13	YDL193W
near-YDL195W_54	chrIV	107142	107204	ATA	54	-65	YDL195W
near-YDL195W_106	chrIV	107194	107206	TTG	106	-13	YDL195W
near-YDL195W_93	chrIV	107181	107204	TTG	93	-26	YDL195W
near-YDL203C_147	chrIV	97954	98005	TTG	147	-52	YDL203C
near-YDL203C_43	chrIV	98080	98109	TTG	43	-156	YDL203C
near-YDL204W_153	chrIV	94259	94369	ATT	153	-345	YDL204W
near-YDL204W_71	chrIV	94177	94284	CTG	71	-427	YDL204W
near-YDL206W_46	chrIV	90072	90174	ATA	46	-103	YDL206W
near-YDL206W_22	chrIV	90048	90174	TTG	22	-127	YDL206W
near-YDL224C_59	chrIV	56586	56651	ATA	59	-305	YDL224C
near-YDL224C_140	chrIV	56520	56570	ATT	140	-224	YDL224C
near-YDL224C_249	chrIV	56363	56461	CTG	249	-115	YDL224C
near-YDL224C_330	chrIV	56363	56380	CTG	330	-34	YDL224C
near-YDL224C_233	chrIV	56370	56477	TTG	233	-131	YDL224C
near-YDL234C_105	chrIV	36478	36515	TTG	105	-38	YDL234C
near-YDL234C_35	chrIV	36526	36585	TTG	35	-108	YDL234C
near-YDL235C_30	chrIV	33919	34002	CTG	30	-84	YDL235C
near-YDL235C_54	chrIV	33919	33978	TTG	54	-60	YDL235C
near-YDR006C_116	chrIV	461250	461282	ATA	116	-35	YDR006C
near-YDR032C_15	chrIV	504696	504749	ATA	15	-54	YDR032C
near-YDR032C_54	chrIV	504696	504710	ATC	54	-15	YDR032C
near-YDR033W_93	chrIV	507993	508010	ATA	93	-153	YDR033W
near-YDR033W_204	chrIV	508104	508118	ATC	204	-42	YDR033W
near-YDR033W_33	chrIV	507933	508010	TTG	33	-213	YDR033W
near-YDR034W-B_2	chrIV	521277	521297	TTG	2	-36	YDR034W-B
near-YDR045C_126	chrIV	548311	548339	TTG	126	-29	YDR045C
near-YDR046C_52	chrIV	550577	550614	AAG	52	-38	YDR046C
near-YDR052C_99	chrIV	560626	560680	CTG	99	-55	YDR052C
near-YDR054C_46	chrIV	562441	562455	ATT	46	-128	YDR054C
near-YDR054C_35	chrIV	562392	562466	TTG	35	-139	YDR054C
near-YDR056C_3	chrIV	565672	565695	GTG	3	-55	YDR056C
near-YDR060W_11	chrIV	570618	570638	GTG	11	-30	YDR060W
near-YDR060W_17	chrIV	570624	570638	TTG	17	-24	YDR060W
near-YDR062W_161	chrIV	576274	576318	AAG	161	-199	YDR062W
near-YDR062W_37	chrIV	576150	576218	ACG	37	-323	YDR062W
near-YDR062W_12	chrIV	576125	576169	ATA	12	-348	YDR062W
near-YDR062W_136	chrIV	576249	576275	ATA	136	-224	YDR062W
near-YDR062W_283	chrIV	576396	576472	ATT	283	-77	YDR062W
near-YDR062W_52	chrIV	576165	576218	ATT	52	-308	YDR062W
near-YDR062W_274	chrIV	576387	576472	GTG	274	-86	YDR062W
near-YDR062W_108	chrIV	576221	576322	TTG	108	-252	YDR062W
near-YDR062W_28	chrIV	576141	576218	TTG	28	-332	YDR062W
near-YDR063W_37	chrIV	578631	578661	ATT	37	-31	YDR063W
near-YDR066C_40	chrIV	582524	582547	GTG	40	-49	YDR066C
near-YDR071C_26	chrIV	589416	589439	ATA	26	-37	YDR071C
near-YDR072C_43	chrIV	591351	591434	ATT	43	-90	YDR072C
near-YDR072C_56	chrIV	591368	591421	CTG	56	-77	YDR072C
near-YDR072C_92	chrIV	591368	591385	CTG	92	-41	YDR072C
near-YDR072C_76	chrIV	591351	591401	TTG	76	-57	YDR072C
near-YDR073W_215	chrIV	592371	592403	ACG	215	-67	YDR073W
near-YDR073W_57	chrIV	592213	592323	TTG	57	-225	YDR073W
near-YDR074W_135	chrIV	593806	593850	ACG	135	-86	YDR074W
near-YDR074W_162	chrIV	593833	593850	ACG	162	-59	YDR074W
near-YDR074W_189	chrIV	593860	593891	ATA	189	-32	YDR074W
near-YDR074W_195	chrIV	593866	593891	CTG	195	-26	YDR074W
near-YDR074W_165	chrIV	593836	593850	TTG	165	-56	YDR074W
near-YDR077W_14	chrIV	600775	600791	ACG	14	-17	YDR077W
near-YDR077W_12	chrIV	600773	600790	ATA	12	-19	YDR077W
near-YDR086C_46	chrIV	617197	617217	ACG	46	-47	YDR086C
near-YDR086C_63	chrIV	617171	617200	ATA	63	-30	YDR086C
near-YDR086C_35	chrIV	617211	617228	TTG	35	-58	YDR086C
near-YDR091C_59	chrIV	628535	628547	ACG	59	-13	YDR091C
near-YDR093W_57	chrIV	631076	631132	CTG	57	-205	YDR093W
near-YDR093W_110	chrIV	631129	631161	TTG	110	-152	YDR093W
near-YDR111C_77	chrIV	679849	679908	TTG	77	-144	YDR111C
near-YDR113C_43	chrIV	681627	681659	CTG	43	-42	YDR113C
near-YDR119W_75	chrIV	688206	688223	TTG	75	-20	YDR119W
near-YDR133C_35	chrIV	721484	721498	ATA	35	-201	YDR133C
near-YDR133C_4	chrIV	721298	721529	ATA	4	-232	YDR133C
near-YDR133C_85	chrIV	721298	721448	ATT	85	-151	YDR133C
near-YDR133C_151	chrIV	721298	721382	TTG	151	-85	YDR133C
near-YDR142C_31	chrIV	741601	741738	CTG	31	-138	YDR142C
near-YDR144C_52	chrIV	746121	746189	TTG	52	-88	YDR144C
near-YDR144C_84	chrIV	746140	746157	TTG	84	-56	YDR144C
near-YDR145W_74	chrIV	746724	746736	ATA	74	-13	YDR145W
near-YDR150W_31	chrIV	755596	755626	ACG	31	-31	YDR150W
near-YDR151C_34	chrIV	765220	765237	TTG	34	-82	YDR151C
near-YDR153C_98	chrIV	767972	768006	ACG	98	-35	YDR153C
near-YDR159W_48	chrIV	771833	771875	TTG	48	-43	YDR159W
near-YDR162C_30	chrIV	781169	781189	ATA	30	-89	YDR162C
near-YDR169C_24	chrIV	794193	794231	ACG	24	-342	YDR169C
near-YDR169C_136	chrIV	794060	794119	CTG	136	-230	YDR169C
near-YDR169C_236	chrIV	793939	794019	CTG	236	-130	YDR169C
near-YDR169C_154	chrIV	794060	794101	GTG	154	-212	YDR169C
near-YDR169C_303	chrIV	793923	793952	TTG	303	-63	YDR169C
near-YDR171W_61	chrIV	806595	806619	ATT	61	-25	YDR171W
near-YDR172W_6	chrIV	808285	808317	TTG	6	-38	YDR172W
near-YDR178W_84	chrIV	817931	817948	ACG	84	-18	YDR178W
near-YDR178W_41	chrIV	817888	817902	CTG	41	-61	YDR178W
near-YDR206W_268	chrIV	861983	862052	ATC	268	-70	YDR206W
near-YDR208W_17	chrIV	868116	868222	ATA	17	-107	YDR208W
near-YDR211W_4	chrIV	884679	884693	GTG	4	-47	YDR211W
near-YDR213W_152	chrIV	889688	889749	TTG	152	-62	YDR213W
near-YDR214W_25	chrIV	892783	892845	ATA	25	-91	YDR214W
near-YDR214W_94	chrIV	892852	892873	ATA	94	-22	YDR214W
near-YDR214W_87	chrIV	892845	892873	ATC	87	-29	YDR214W
near-YDR214W_35	chrIV	892793	892855	TTG	35	-81	YDR214W
near-YDR224C_21	chrIV	914713	914725	ATA	21	-13	YDR224C
near-YDR225W_52	chrIV	915506	915520	ATT	52	-23	YDR225W
near-YDR225W_25	chrIV	915479	915520	GTG	25	-50	YDR225W
near-YDR227W_98	chrIV	917543	917569	ATA	98	-27	YDR227W
near-YDR232W_66	chrIV	927266	927394	CTG	66	-185	YDR232W
near-YDR234W_11	chrIV	931112	931127	ATT	11	-16	YDR234W
near-YDR242W_77	chrIV	946787	946805	ACG	77	-19	YDR242W
near-YDR247W_189	chrIV	955832	955942	CTG	189	-180	YDR247W
near-YDR251W_223	chrIV	960530	960612	CTG	223	-83	YDR251W
near-YDR251W_235	chrIV	960542	960612	CTG	235	-71	YDR251W
near-YDR251W_133	chrIV	960440	960475	TTG	133	-173	YDR251W
near-YDR251W_255	chrIV	960562	960600	TTG	255	-51	YDR251W
near-YDR266C_103	chrIV	1002089	1002136	ATA	103	-113	YDR266C
near-YDR266C_49	chrIV	1002176	1002190	CTG	49	-167	YDR266C
near-YDR266C_188	chrIV	1002025	1002051	GTG	188	-28	YDR266C
near-YDR266C_68	chrIV	1002106	1002171	TTG	68	-148	YDR266C
near-YDR279W_40	chrIV	1019329	1019366	ATA	40	-38	YDR279W
near-YDR280W_64	chrIV	1020702	1020745	GTG	64	-44	YDR280W
near-YDR284C_88	chrIV	1031577	1031612	ACG	88	-193	YDR284C
near-YDR284C_125	chrIV	1031540	1031575	ATA	125	-156	YDR284C
near-YDR284C_103	chrIV	1031577	1031597	CTG	103	-178	YDR284C
near-YDR284C_178	chrIV	1031496	1031522	CTG	178	-103	YDR284C
near-YDR284C_183	chrIV	1031420	1031517	TTG	183	-98	YDR284C
near-YDR284C_235	chrIV	1031439	1031465	TTG	235	-46	YDR284C
near-YDR284C_29	chrIV	1031615	1031671	TTG	29	-252	YDR284C
near-YDR293C_279	chrIV	1049919	1049963	AAG	279	-571	YDR293C
near-YDR293C_123	chrIV	1050003	1050119	ACG	123	-727	YDR293C
near-YDR293C_152	chrIV	1050043	1050090	ACG	152	-698	YDR293C
near-YDR293C_243	chrIV	1049919	1049999	ACG	243	-607	YDR293C
near-YDR293C_519	chrIV	1049634	1049723	ATA	519	-331	YDR293C
near-YDR293C_758	chrIV	1049393	1049484	ATC	758	-92	YDR293C
near-YDR293C_99	chrIV	1050003	1050143	ATC	99	-751	YDR293C
near-YDR293C_417	chrIV	1049634	1049825	ATT	417	-433	YDR293C
near-YDR293C_437	chrIV	1049737	1049805	ATT	437	-413	YDR293C
near-YDR293C_557	chrIV	1049587	1049685	ATT	557	-293	YDR293C
near-YDR293C_602	chrIV	1049587	1049640	ATT	602	-248	YDR293C
near-YDR293C_661	chrIV	1049543	1049581	ATT	661	-189	YDR293C
near-YDR293C_114	chrIV	1050003	1050128	CTG	114	-736	YDR293C
near-YDR293C_493	chrIV	1049732	1049749	CTG	493	-357	YDR293C
near-YDR293C_225	chrIV	1050003	1050017	TTG	225	-625	YDR293C
near-YDR293C_292	chrIV	1049933	1049950	TTG	292	-558	YDR293C
near-YDR293C_474	chrIV	1049634	1049768	TTG	474	-376	YDR293C
near-YDR293C_546	chrIV	1049634	1049696	TTG	546	-304	YDR293C
near-YDR293C_594	chrIV	1049634	1049648	TTG	594	-256	YDR293C
near-YDR295C_211	chrIV	1054673	1054699	TTG	211	-52	YDR295C
near-YDR298C_106	chrIV	1058828	1058854	ATT	106	-40	YDR298C
near-YDR298C_125	chrIV	1058815	1058835	ATT	125	-21	YDR298C
near-YDR298C_76	chrIV	1058861	1058884	TTG	76	-70	YDR298C
near-YDR303C_134	chrIV	1071458	1071544	ATT	134	-158	YDR303C
near-YDR303C_139	chrIV	1071441	1071539	ATT	139	-153	YDR303C
near-YDR303C_189	chrIV	1071430	1071489	CTG	189	-103	YDR303C
near-YDR310C_25	chrIV	1084546	1084569	ATA	25	-253	YDR310C
near-YDR310C_261	chrIV	1084317	1084333	ATT	261	-17	YDR310C
near-YDR310C_110	chrIV	1084413	1084484	CTG	110	-168	YDR310C
near-YDR319C_42	chrIV	1105828	1105864	ATT	42	-37	YDR319C
near-YDR328C_36	chrIV	1126035	1126049	ATA	36	-31	YDR328C
near-YDR343C_22	chrIV	1161334	1161384	TTG	22	-64	YDR343C
near-YDR346C_91	chrIV	1168660	1168688	ACG	91	-29	YDR346C
near-YDR346C_76	chrIV	1168660	1168703	ATC	76	-44	YDR346C
near-YDR346C_62	chrIV	1168664	1168717	ATT	62	-58	YDR346C
near-YDR346C_12	chrIV	1168681	1168767	TTG	12	-108	YDR346C
near-YDR346C_30	chrIV	1168681	1168749	TTG	30	-90	YDR346C
near-YDR346C_67	chrIV	1168660	1168712	TTG	67	-53	YDR346C
near-YDR348C_183	chrIV	1171827	1171841	ATA	183	-16	YDR348C
near-YDR348C_161	chrIV	1171826	1171863	ATT	161	-38	YDR348C
near-YDR348C_108	chrIV	1171902	1171916	CTG	108	-91	YDR348C
near-YDR348C_146	chrIV	1171826	1171878	TTG	146	-53	YDR348C
near-YDR348C_174	chrIV	1171827	1171850	TTG	174	-25	YDR348C
near-YDR348C_26	chrIV	1171924	1171998	TTG	26	-173	YDR348C
near-YDR349C_43	chrIV	1174212	1174238	TTG	43	-62	YDR349C
near-YDR349C_55	chrIV	1174212	1174226	TTG	55	-50	YDR349C
near-YDR352W_90	chrIV	1181702	1181719	ATC	90	-98	YDR352W
near-YDR352W_119	chrIV	1181731	1181769	TTG	119	-69	YDR352W
near-YDR352W_142	chrIV	1181754	1181783	TTG	142	-46	YDR352W
near-YDR353W_21	chrIV	1183271	1183297	ACG	21	-27	YDR353W
near-YDR354W_17	chrIV	1184687	1184701	CTG	17	-59	YDR354W
near-YDR354W_2	chrIV	1184672	1184701	CTG	2	-74	YDR354W
near-YDR357C_38	chrIV	1189588	1189608	ATT	38	-41	YDR357C
near-YDR357C_22	chrIV	1189604	1189624	GTG	22	-57	YDR357C
near-YDR359C_19	chrIV	1195124	1195180	GTG	19	-296	YDR359C
near-YDR363W_116	chrIV	1199122	1199178	ATT	116	-60	YDR363W
near-YDR368W_11	chrIV	1213863	1213902	ATA	11	-40	YDR368W
near-YDR368W_38	chrIV	1213890	1213902	ATA	38	-13	YDR368W
near-YDR372C_34	chrIV	1222291	1222386	ACG	34	-237	YDR372C
near-YDR372C_74	chrIV	1222296	1222346	CTG	74	-197	YDR372C
near-YDR372C_105	chrIV	1222265	1222315	TTG	105	-166	YDR372C
near-YDR372C_182	chrIV	1222203	1222238	TTG	182	-89	YDR372C
near-YDR372C_37	chrIV	1222291	1222383	TTG	37	-234	YDR372C
near-YDR372C_65	chrIV	1222296	1222355	TTG	65	-206	YDR372C
near-YDR377W_38	chrIV	1228581	1228609	GTG	38	-29	YDR377W
near-YDR377W_47	chrIV	1228590	1228609	GTG	47	-20	YDR377W
near-YDR377W_7	chrIV	1228550	1228609	TTG	7	-60	YDR377W
near-YDR380W_82	chrIV	1234194	1234214	ATA	82	-23	YDR380W
near-YDR380W_33	chrIV	1234145	1234165	TTG	33	-72	YDR380W
near-YDR380W_50	chrIV	1234162	1234179	TTG	50	-55	YDR380W
near-YDR382W_58	chrIV	1239468	1239490	ATA	58	-23	YDR382W
near-YDR382W_33	chrIV	1239443	1239478	CTG	33	-48	YDR382W
near-YDR384C_29	chrIV	1242033	1242056	ATA	29	-25	YDR384C
near-YDR387C_121	chrIV	1249829	1249846	AGG	121	-25	YDR387C
near-YDR395W_42	chrIV	1263249	1263322	TTG	42	-74	YDR395W
near-YDR395W_54	chrIV	1263261	1263322	TTG	54	-62	YDR395W
near-YDR395W_75	chrIV	1263282	1263322	TTG	75	-41	YDR395W
near-YDR397C_57	chrIV	1266899	1266918	TTG	57	-20	YDR397C
near-YDR399W_30	chrIV	1270028	1270066	ATT	30	-39	YDR399W
near-YDR399W_40	chrIV	1270038	1270066	GTG	40	-29	YDR399W
near-YDR404C_136	chrIV	1277184	1277225	AAG	136	-56	YDR404C
near-YDR404C_109	chrIV	1277235	1277252	ATT	109	-83	YDR404C
near-YDR404C_130	chrIV	1277184	1277231	GTG	130	-62	YDR404C
near-YDR430C_26	chrIV	1328488	1328523	ATT	26	-53	YDR430C
near-YDR434W_75	chrIV	1331185	1331214	ATA	75	-51	YDR434W
near-YDR441C_65	chrIV	1345115	1345132	ATA	65	-70	YDR441C
near-YDR441C_56	chrIV	1345115	1345141	ATC	56	-79	YDR441C
near-YDR452W_107	chrIV	1362834	1362866	TTG	107	-43	YDR452W
near-YDR452W_85	chrIV	1362812	1362850	TTG	85	-65	YDR452W
near-YDR452W_94	chrIV	1362821	1362850	TTG	94	-56	YDR452W
near-YDR453C_12	chrIV	1365689	1365718	ATT	12	-56	YDR453C
near-YDR453C_3	chrIV	1365689	1365727	GTG	3	-65	YDR453C
near-YDR460W_20	chrIV	1383718	1383756	CTG	20	-92	YDR460W
near-YDR460W_45	chrIV	1383743	1383802	TTG	45	-67	YDR460W
near-YDR462W_41	chrIV	1386059	1386071	ACG	41	-13	YDR462W
near-YDR462W_18	chrIV	1386036	1386068	CTG	18	-36	YDR462W
near-YDR468C_70	chrIV	1398704	1398724	TTG	70	-24	YDR468C
near-YDR477W_58	chrIV	1412136	1412213	ATA	58	-236	YDR477W
near-YDR477W_31	chrIV	1412109	1412213	TTG	31	-263	YDR477W
near-YDR481C_22	chrIV	1420266	1420283	ATA	22	-33	YDR481C
near-YDR490C_49	chrIV	1434269	1434304	GTG	49	-36	YDR490C
near-YDR492W_60	chrIV	1434829	1434882	CTG	60	-94	YDR492W
near-YDR492W_54	chrIV	1434823	1434882	GTG	54	-100	YDR492W
near-YDR493W_58	chrIV	1436173	1436215	CTG	58	-43	YDR493W
near-YDR497C_45	chrIV	1445468	1445497	ATT	45	-30	YDR497C
near-YDR497C_16	chrIV	1445468	1445526	TTG	16	-59	YDR497C
near-YDR502C_13	chrIV	1454467	1454499	ATA	13	-35	YDR502C
near-YDR502C_22	chrIV	1454467	1454490	ATT	22	-26	YDR502C
near-YDR505C_191	chrIV	1459221	1459258	GTG	191	-38	YDR505C
near-YDR505C_87	chrIV	1459321	1459362	GTG	87	-142	YDR505C
near-YDR514C_16	chrIV	1473000	1473044	ATT	16	-45	YDR514C
near-YDR515W_44	chrIV	1473245	1473259	TTG	44	-183	YDR515W
near-YDR516C_20	chrIV	1476477	1476508	TTG	20	-32	YDR516C
near-YDR524C-B_20	chrIV	1489799	1489823	ATC	20	-25	YDR524C-B
near-YDR524C-B_3	chrIV	1489799	1489840	ATT	3	-42	YDR524C-B
near-YDR528W_78	chrIV	1494345	1494398	CTG	78	-240	YDR528W
near-YEL002C_7	chrV	150016	150057	TTG	7	-43	YEL002C
near-YEL009C_140	chrV	140168	140194	ATA	140	-431	YEL009C
near-YEL009C_117	chrV	140146	140217	ATC	117	-454	YEL009C
near-YEL009C_129	chrV	140146	140205	ATC	129	-442	YEL009C
near-YEL009C_179	chrV	140138	140155	ATC	179	-392	YEL009C
near-YEL009C_68	chrV	140168	140266	ATC	68	-503	YEL009C
near-YEL009C_162	chrV	140146	140172	ATT	162	-409	YEL009C
near-YEL009C_192	chrV	140128	140142	ATT	192	-379	YEL009C
near-YEL009C_85	chrV	140181	140249	ATT	85	-486	YEL009C
near-YEL009C_349	chrV	139971	139985	CTG	349	-222	YEL009C
near-YEL009C_292	chrV	139989	140042	TTG	292	-279	YEL009C
near-YEL009C_62	chrV	140168	140272	TTG	62	-509	YEL009C
near-YEL012W_7	chrV	131683	131724	ATA	7	-88	YEL012W
near-YEL013W_182	chrV	128757	128823	ACG	182	-67	YEL013W
near-YEL013W_206	chrV	128781	128823	ATA	206	-43	YEL013W
near-YEL016C_115	chrV	126251	126286	ATT	115	-68	YEL016C
near-YEL021W_20	chrV	116153	116165	ACG	20	-13	YEL021W
near-YEL023C_173	chrV	110916	110948	AAG	173	-396	YEL023C
near-YEL023C_117	chrV	110966	111004	ATT	117	-452	YEL023C
near-YEL023C_43	chrV	111037	111078	TTG	43	-526	YEL023C
near-YEL024W_37	chrV	107195	107212	ATT	37	-64	YEL024W
near-YEL024W_71	chrV	107229	107258	ATT	71	-30	YEL024W
near-YEL024W_41	chrV	107199	107258	TTG	41	-60	YEL024W
near-YEL026W_28	chrV	101880	101927	ATA	28	-62	YEL026W
near-YEL026W_72	chrV	101924	101941	ATA	72	-18	YEL026W
near-YEL026W_31	chrV	101883	101927	CTG	31	-59	YEL026W
near-YEL026W_49	chrV	101901	101927	TTG	49	-41	YEL026W
near-YEL027W_38	chrV	100743	100767	ATA	38	-25	YEL027W
near-YEL027W_32	chrV	100737	100767	ATT	32	-31	YEL027W
near-YEL032W_7	chrV	86892	86935	TTG	7	-44	YEL032W
near-YEL034W_5	chrV	85627	85674	ATT	5	-48	YEL034W
near-YEL036C_85	chrV	84592	84612	ATC	85	-60	YEL036C
near-YEL037C_97	chrV	82604	82665	ATA	97	-62	YEL037C
near-YEL037C_36	chrV	82673	82726	TTG	36	-123	YEL037C
near-YEL037C_61	chrV	82604	82701	TTG	61	-98	YEL037C
near-YEL039C_112	chrV	80012	80035	ATT	112	-58	YEL039C
near-YEL039C_68	chrV	80002	80079	TTG	68	-102	YEL039C
near-YEL042W_177	chrV	73745	73769	ATT	177	-25	YEL042W
near-YEL050C_16	chrV	60852	60886	ATA	16	-35	YEL050C
near-YEL063C_105	chrV	33566	33592	ATA	105	-126	YEL063C
near-YEL063C_128	chrV	33549	33569	ATA	128	-103	YEL063C
near-YEL063C_136	chrV	33502	33561	ATC	136	-95	YEL063C
near-YEL063C_94	chrV	33502	33603	CTG	94	-137	YEL063C
near-YER002W_15	chrV	156768	156782	CTG	15	-34	YER002W
near-YER012W_30	chrV	177803	177833	ATA	30	-31	YER012W
near-YER019C-A_15	chrV	194540	194569	GTG	15	-30	YER019C-A
near-YER020W_23	chrV	195127	195166	TTG	23	-40	YER020W
near-YER027C_24	chrV	210236	210280	TTG	24	-48	YER027C
near-YER041W_54	chrV	232432	232459	TTG	54	-28	YER041W
near-YER046W_601	chrV	243114	243134	TTG	601	-65	YER046W
near-YER048C_3	chrV	248183	248230	AAG	3	-73	YER048C
near-YER048W-A_45	chrV	250681	250716	ATA	45	-36	YER048W-A
near-YER048W-A_36	chrV	250672	250716	ATC	36	-45	YER048W-A
near-YER048W-A_54	chrV	250690	250716	TTG	54	-27	YER048W-A
near-YER052C_33	chrV	257966	258007	ATA	33	-49	YER052C
near-YER056C_13	chrV	268161	268187	ATA	13	-74	YER056C
near-YER056C_56	chrV	268114	268144	ATC	56	-31	YER056C
near-YER056C_68	chrV	268114	268132	ATT	68	-19	YER056C
near-YER064C_20	chrV	284233	284292	ATA	20	-70	YER064C
near-YER065C_19	chrV	287175	287216	ACG	19	-302	YER065C
near-YER067W_20	chrV	292009	292064	ATA	20	-56	YER067W
near-YER067W_30	chrV	292019	292036	ATA	30	-46	YER067W
near-YER067W_50	chrV	292039	292064	ATC	50	-26	YER067W
near-YER067W_10	chrV	291999	292022	TTG	10	-66	YER067W
near-YER068W_17	chrV	292999	293048	ATA	17	-50	YER068W
near-YER068W_38	chrV	293020	293048	ATA	38	-29	YER068W
near-YER075C_16	chrV	311295	311345	CTG	16	-146	YER075C
near-YER078C_123	chrV	318392	318427	GTG	123	-85	YER078C
near-YER078C_189	chrV	318344	318361	GTG	189	-19	YER078C
near-YER080W_18	chrV	319949	319961	ACG	18	-13	YER080W
near-YER081W_17	chrV	322229	322255	AAG	17	-456	YER081W
near-YER081W_109	chrV	322321	322404	ATT	109	-364	YER081W
near-YER081W_11	chrV	322223	322255	TTG	11	-462	YER081W
near-YER081W_7	chrV	322219	322275	TTG	7	-466	YER081W
near-YER088C_51	chrV	335189	335226	GTG	51	-38	YER088C
near-YER089C_218	chrV	337420	337434	ATT	218	-94	YER089C
near-YER089C_14	chrV	337573	337638	CTG	14	-298	YER089C
near-YER089C_45	chrV	337593	337607	GTG	45	-267	YER089C
near-YER089C_27	chrV	337593	337625	TTG	27	-285	YER089C
near-YER089C_276	chrV	337359	337376	TTG	276	-36	YER089C
near-YER094C_58	chrV	349361	349378	ATA	58	-32	YER094C
near-YER094C_31	chrV	349361	349405	GTG	31	-59	YER094C
near-YER094C_61	chrV	349361	349375	TTG	61	-29	YER094C
near-YER100W_133	chrV	359417	359515	ATT	133	-144	YER100W
near-YER100W_181	chrV	359465	359515	GTG	181	-96	YER100W
near-YER100W_100	chrV	359384	359515	TTG	100	-177	YER100W
near-YER100W_54	chrV	359338	359376	TTG	54	-223	YER100W
near-YER107C_72	chrV	374601	374666	ATT	72	-121	YER107C
near-YER107C_139	chrV	374579	374599	CTG	139	-54	YER107C
near-YER107C_59	chrV	374608	374679	CTG	59	-134	YER107C
near-YER107C_15	chrV	374700	374723	TTG	15	-178	YER107C
near-YER107C_73	chrV	374621	374665	TTG	73	-120	YER107C
near-YER110C_18	chrV	382147	382197	ATC	18	-94	YER110C
near-YER110C_34	chrV	382155	382181	CTG	34	-78	YER110C
near-YER110C_72	chrV	382108	382143	CTG	72	-40	YER110C
near-YER111C_211	chrV	385969	386001	ATT	211	-125	YER111C
near-YER111C_290	chrV	385877	385922	CTG	290	-46	YER111C
near-YER111C_193	chrV	385969	386019	TTG	193	-143	YER111C
near-YER111C_251	chrV	385877	385961	TTG	251	-85	YER111C
near-YER115C_62	chrV	394942	395022	AAG	62	-155	YER115C
near-YER118C_146	chrV	399056	399101	ATC	146	-46	YER118C
near-YER118C_155	chrV	399056	399092	ATC	155	-37	YER118C
near-YER118C_74	chrV	399123	399173	ATC	74	-118	YER118C
near-YER118C_139	chrV	399056	399108	ATT	139	-53	YER118C
near-YER118C_121	chrV	399056	399126	TTG	121	-71	YER118C
near-YER118C_133	chrV	399056	399114	TTG	133	-59	YER118C
near-YER123W_86	chrV	404710	404733	TTG	86	-102	YER123W
near-YER123W_95	chrV	404719	404733	TTG	95	-93	YER123W
near-YER126C_7	chrV	414180	414199	CTG	7	-20	YER126C
near-YER130C_35	chrV	422447	422478	ATA	35	-32	YER130C
near-YER133W_48	chrV	432473	432493	ATA	48	-21	YER133W
near-YER133W_39	chrV	432464	432493	ATT	39	-30	YER133W
near-YER133W_21	chrV	432446	432493	CTG	21	-48	YER133W
near-YER148W_174	chrV	465283	465301	AAG	174	-19	YER148W
near-YER148W_82	chrV	465191	465205	ACG	82	-111	YER148W
near-YER148W_46	chrV	465155	465175	ATA	46	-147	YER148W
near-YER148W_63	chrV	465172	465189	ATA	63	-130	YER148W
near-YER148W_70	chrV	465179	465205	ATA	70	-123	YER148W
near-YER148W_77	chrV	465186	465299	ATA	77	-116	YER148W
near-YER148W_51	chrV	465160	465189	ATC	51	-142	YER148W
near-YER148W_129	chrV	465238	465261	CTG	129	-64	YER148W
near-YER148W_98	chrV	465207	465299	CTG	98	-95	YER148W
near-YER148W_167	chrV	465276	465299	GTG	167	-26	YER148W
near-YER159C_10	chrV	492105	492131	AAG	10	-173	YER159C
near-YER159C_55	chrV	492048	492086	ACG	55	-128	YER159C
near-YER159C_147	chrV	491959	491994	ATA	147	-36	YER159C
near-YER165W_41	chrV	510271	510321	ATA	41	-101	YER165W
near-YER169W_195	chrV	523339	523367	TTG	195	-29	YER169W
near-YFL004W_71	chrVI	131790	131807	ATA	71	-19	YFL004W
near-YFL005W_5	chrVI	130201	130221	ATT	5	-132	YFL005W
near-YFL007W_44	chrVI	123377	123439	ACG	44	-101	YFL007W
near-YFL009W_24	chrVI	115976	116110	ATT	24	-168	YFL009W
near-YFL018C_57	chrVI	103128	103149	AAG	57	-22	YFL018C
near-YFL018C_53	chrVI	103128	103153	ATC	53	-26	YFL018C
near-YFL018C_37	chrVI	103137	103169	TTG	37	-42	YFL018C
near-YFL034C-A_18	chrVI	64933	64956	ATC	18	-24	YFL034C-A
near-YFL034W_46	chrVI	65357	65407	CTG	46	-119	YFL034W
near-YFL037W_17	chrVI	56287	56334	ATA	17	-48	YFL037W
near-YFL038C_2	chrVI	55988	56008	ATA	2	-22	YFL038C
near-YFL039C_35	chrVI	54704	54781	ATA	35	-85	YFL039C
near-YFL039C_40	chrVI	54753	54776	ATC	40	-80	YFL039C
near-YFL039C_97	chrVI	54699	54719	ATC	97	-23	YFL039C
near-YFL039C_78	chrVI	54697	54738	CTG	78	-42	YFL039C
near-YFL039C_25	chrVI	54753	54791	TTG	25	-95	YFL039C
near-YFL045C_62	chrVI	44393	44405	ATA	62	-13	YFL045C
near-YFL045C_19	chrVI	44407	44448	ATT	19	-56	YFL045C
near-YFL050C_80	chrVI	36443	36547	ATT	80	-699	YFL050C
near-YFR021W_48	chrVI	194765	194810	ATA	48	-46	YFR021W
near-YFR021W_51	chrVI	194768	194810	GTG	51	-43	YFR021W
near-YFR031C-A_8	chrVI	221419	221434	ATT	8	-16	YFR031C-A
near-YFR049W_129	chrVI	248489	248521	AAG	129	-33	YFR049W
near-YFR049W_93	chrVI	248453	248521	ATT	93	-69	YFR049W
near-YFR049W_72	chrVI	248432	248521	TTG	72	-90	YFR049W
near-YFR050C_37	chrVI	249867	249882	ATA	37	-16	YFR050C
near-YFR053C_11	chrVI	255051	255134	ATT	11	-85	YFR053C
near-YFR053C_74	chrVI	255051	255071	ATT	74	-22	YFR053C
near-YGL003C_58	chrVII	494175	494219	ATT	58	-45	YGL003C
near-YGL003C_22	chrVII	494175	494255	TTG	22	-81	YGL003C
near-YGL008C_108	chrVII	482726	482794	ATA	108	-128	YGL008C
near-YGL008C_217	chrVII	482667	482685	ATT	217	-19	YGL008C
near-YGL008C_67	chrVII	482806	482835	ATT	67	-169	YGL008C
near-YGL008C_4	chrVII	482839	482898	GTG	4	-232	YGL008C
near-YGL009C_17	chrVII	478656	478706	TTG	17	-54	YGL009C
near-YGL009C_23	chrVII	478656	478700	TTG	23	-48	YGL009C
near-YGL009C_33	chrVII	478653	478690	TTG	33	-38	YGL009C
near-YGL018C_19	chrVII	459665	459680	AAG	19	-16	YGL018C
near-YGL019W_25	chrVII	458104	458139	TTG	25	-51	YGL019W
near-YGL019W_33	chrVII	458112	458135	TTG	33	-43	YGL019W
near-YGL022W_12	chrVII	452350	452402	ATC	12	-53	YGL022W
near-YGL022W_31	chrVII	452369	452402	ATC	31	-34	YGL022W
near-YGL022W_43	chrVII	452381	452402	ATT	43	-22	YGL022W
near-YGL028C_127	chrVII	442929	442949	ACG	127	-40	YGL028C
near-YGL028C_54	chrVII	443008	443022	ATA	54	-113	YGL028C
near-YGL028C_9	chrVII	443008	443067	ATA	9	-158	YGL028C
near-YGL028C_102	chrVII	442910	442974	CTG	102	-65	YGL028C
near-YGL029W_1	chrVII	440018	440061	CTG	1	-44	YGL029W
near-YGL030W_38	chrVII	439070	439089	ATT	38	-20	YGL030W
near-YGL030W_12	chrVII	439044	439089	GTG	12	-46	YGL030W
near-YGL032C_47	chrVII	436905	436922	ACG	47	-89	YGL032C
near-YGL035C_106	chrVII	433063	433087	GTG	106	-25	YGL035C
near-YGL039W_4	chrVII	423849	423878	TTG	4	-111	YGL039W
near-YGL040C_34	chrVII	420571	420597	TTG	34	-42	YGL040C
near-YGL044C_183	chrVII	417037	417080	ACG	183	-44	YGL044C
near-YGL044C_177	chrVII	417037	417086	ATA	177	-50	YGL044C
near-YGL044C_49	chrVII	417125	417214	ATA	49	-178	YGL044C
near-YGL044C_132	chrVII	417093	417131	TTG	132	-95	YGL044C
near-YGL049C_154	chrVII	409610	409624	ATA	154	-20	YGL049C
near-YGL049C_76	chrVII	409670	409702	ATA	76	-98	YGL049C
near-YGL049C_137	chrVII	409621	409641	ATT	137	-37	YGL049C
near-YGL049C_110	chrVII	409621	409668	CTG	110	-64	YGL049C
near-YGL049C_119	chrVII	409621	409659	CTG	119	-55	YGL049C
near-YGL049C_125	chrVII	409621	409653	CTG	125	-49	YGL049C
near-YGL049C_29	chrVII	409699	409749	TTG	29	-145	YGL049C
near-YGL055W_19	chrVII	398584	398601	GTG	19	-43	YGL055W
near-YGL056C_56	chrVII	397619	397660	ACG	56	-42	YGL056C
near-YGL056C_8	chrVII	397619	397708	CTG	8	-90	YGL056C
near-YGL058W_21	chrVII	393946	393978	ATT	21	-39	YGL058W
near-YGL060W_94	chrVII	390028	390063	AAG	94	-36	YGL060W
near-YGL060W_49	chrVII	389983	390063	ATT	49	-81	YGL060W
near-YGL067W_32	chrVII	376073	376099	TTG	32	-27	YGL067W
near-YGL071W_94	chrVII	371647	371682	ATT	94	-364	YGL071W
near-YGL071W_140	chrVII	371693	371737	TTG	140	-318	YGL071W
near-YGL071W_353	chrVII	371906	371950	TTG	353	-105	YGL071W
near-YGL071W_394	chrVII	371947	371961	TTG	394	-64	YGL071W
near-YGL077C_75	chrVII	363977	364012	ATA	75	-96	YGL077C
near-YGL077C_133	chrVII	363931	363954	CTG	133	-38	YGL077C
near-YGL077C_71	chrVII	363996	364016	TTG	71	-100	YGL077C
near-YGL115W_26	chrVII	291937	291981	TTG	26	-95	YGL115W
near-YGL115W_44	chrVII	291955	291981	TTG	44	-77	YGL115W
near-YGL116W_114	chrVII	289776	289807	ATA	114	-32	YGL116W
near-YGL116W_47	chrVII	289709	289768	TTG	47	-99	YGL116W
near-YGL123W_63	chrVII	277581	277598	ATA	63	-35	YGL123W
near-YGL123W_77	chrVII	277595	277612	ATA	77	-21	YGL123W
near-YGL123W_20	chrVII	277538	277612	ATT	20	-78	YGL123W
near-YGL123W_54	chrVII	277572	277598	ATT	54	-44	YGL123W
near-YGL123W_47	chrVII	277565	277612	GTG	47	-51	YGL123W
near-YGL123W_14	chrVII	277532	277612	TTG	14	-84	YGL123W
near-YGL125W_70	chrVII	272450	272467	ATA	70	-69	YGL125W
near-YGL133W_94	chrVII	257599	257670	ATA	94	-107	YGL133W
near-YGL133W_85	chrVII	257590	257670	CTG	85	-116	YGL133W
near-YGL139W_64	chrVII	245465	245542	ACG	64	-250	YGL139W
near-YGL139W_76	chrVII	245477	245542	ATC	76	-238	YGL139W
near-YGL139W_70	chrVII	245471	245542	CTG	70	-244	YGL139W
near-YGL155W_87	chrVII	214031	214079	GTG	87	-49	YGL155W
near-YGL157W_9	chrVII	208965	208991	TTG	9	-40	YGL157W
near-YGL160W_41	chrVII	200488	200559	GTG	41	-72	YGL160W
near-YGL161C_39	chrVII	200174	200188	ACG	39	-46	YGL161C
near-YGL161C_43	chrVII	200167	200184	TTG	43	-42	YGL161C
near-YGL167C_320	chrVII	190483	190524	ACG	320	-56	YGL167C
near-YGL167C_202	chrVII	190571	190642	ATA	202	-174	YGL167C
near-YGL167C_169	chrVII	190571	190675	ATC	169	-207	YGL167C
near-YGL167C_17	chrVII	190798	190827	ATC	17	-359	YGL167C
near-YGL167C_88	chrVII	190724	190756	ATT	88	-288	YGL167C
near-YGL167C_123	chrVII	190662	190721	GTG	123	-253	YGL167C
near-YGL167C_155	chrVII	190642	190689	TTG	155	-221	YGL167C
near-YGL167C_70	chrVII	190724	190774	TTG	70	-306	YGL167C
near-YGL169W_31	chrVII	186030	186057	CTG	31	-28	YGL169W
near-YGL179C_37	chrVII	165092	165142	TTG	37	-51	YGL179C
near-YGL181W_19	chrVII	157877	157904	ATT	19	-28	YGL181W
near-YGL190C_203	chrVII	147636	147731	ATA	203	-342	YGL190C
near-YGL190C_428	chrVII	147474	147506	ATA	428	-117	YGL190C
near-YGL190C_489	chrVII	147401	147445	ATA	489	-56	YGL190C
near-YGL190C_292	chrVII	147613	147642	ATT	292	-253	YGL190C
near-YGL190C_366	chrVII	147545	147568	ATT	366	-179	YGL190C
near-YGL190C_85	chrVII	147817	147849	ATT	85	-460	YGL190C
near-YGL190C_260	chrVII	147636	147674	CTG	260	-285	YGL190C
near-YGL190C_269	chrVII	147636	147665	TTG	269	-276	YGL190C
near-YGL190C_276	chrVII	147545	147658	TTG	276	-269	YGL190C
near-YGL191W_85	chrVII	144789	144806	ATA	85	-18	YGL191W
near-YGL194C-A_239	chrVII	139962	139977	ATA	239	-16	YGL194C-A
near-YGL196W_24	chrVII	129841	129881	TTG	24	-41	YGL196W
near-YGL202W_51	chrVII	115986	116003	ATT	51	-72	YGL202W
near-YGL202W_77	chrVII	116012	116057	CTG	77	-46	YGL202W
near-YGL202W_83	chrVII	116018	116057	TTG	83	-40	YGL202W
near-YGL202W_95	chrVII	116030	116057	TTG	95	-28	YGL202W
near-YGL206C_81	chrVII	107505	107536	ATA	81	-32	YGL206C
near-YGL206C_87	chrVII	107505	107530	ATA	87	-26	YGL206C
near-YGL206C_11	chrVII	107586	107606	TTG	11	-102	YGL206C
near-YGL207W_60	chrVII	98922	98942	CTG	60	-46	YGL207W
near-YGL207W_82	chrVII	98944	98961	CTG	82	-24	YGL207W
near-YGL215W_220	chrVII	87728	87742	AAG	220	-252	YGL215W
near-YGL215W_130	chrVII	87638	87742	ATT	130	-342	YGL215W
near-YGL215W_121	chrVII	87629	87742	TTG	121	-351	YGL215W
near-YGL215W_181	chrVII	87689	87742	TTG	181	-291	YGL215W
near-YGL215W_193	chrVII	87701	87742	TTG	193	-279	YGL215W
near-YGL222C_34	chrVII	81187	81230	ATT	34	-44	YGL222C
near-YGL224C_86	chrVII	78858	78873	ATC	86	-16	YGL224C
near-YGL224C_89	chrVII	78858	78870	ATT	89	-13	YGL224C
near-YGL224C_17	chrVII	78858	78942	TTG	17	-85	YGL224C
near-YGL244W_11	chrVII	41462	41494	TTG	11	-35	YGL244W
near-YGL244W_26	chrVII	41477	41494	TTG	26	-20	YGL244W
near-YGL248W_8	chrVII	35596	35651	GTG	8	-56	YGL248W
near-YGL253W_22	chrVII	23909	23932	ATA	22	-25	YGL253W
near-YGL255W_11	chrVII	20943	20976	ATA	11	-34	YGL255W
near-YGL255W_30	chrVII	20962	20976	ATC	30	-15	YGL255W
near-YGL257C_70	chrVII	14179	14196	GTG	70	-39	YGL257C
near-YGR007W_2	chrVII	506939	506953	AGG	2	-29	YGR007W
near-YGR008C_36	chrVII	508398	508415	ACG	36	-51	YGR008C
near-YGR020C_30	chrVII	527340	527363	ATA	30	-34	YGR020C
near-YGR020C_6	chrVII	527340	527387	ATA	6	-58	YGR020C
near-YGR020C_18	chrVII	527340	527375	ATT	18	-46	YGR020C
near-YGR020C_43	chrVII	527333	527350	CTG	43	-21	YGR020C
near-YGR031W_41	chrVII	546409	546432	GTG	41	-31	YGR031W
near-YGR031W_58	chrVII	546426	546439	TTG	58	-14	YGR031W
near-YGR033C_30	chrVII	554968	555014	TTG	30	-47	YGR033C
near-YGR034W_13	chrVII	555797	555810	AAG	13	-14	YGR034W
near-YGR034W_1	chrVII	555785	555810	ACG	1	-26	YGR034W
near-YGR035C_49	chrVII	557423	557463	ACG	49	-41	YGR035C
near-YGR036C_37	chrVII	558940	558996	GTG	37	-128	YGR036C
near-YGR038W_21	chrVII	560564	560677	TTG	21	-117	YGR038W
near-YGR038W_39	chrVII	560582	560677	TTG	39	-99	YGR038W
near-YGR038W_60	chrVII	560603	560677	TTG	60	-78	YGR038W
near-YGR041W_117	chrVII	577288	577350	ATT	117	-198	YGR041W
near-YGR041W_109	chrVII	577280	577297	TTG	109	-206	YGR041W
near-YGR041W_176	chrVII	577347	577397	TTG	176	-139	YGR041W
near-YGR041W_36	chrVII	577207	577224	TTG	36	-279	YGR041W
near-YGR053C_63	chrVII	595857	595877	ATA	63	-40	YGR053C
near-YGR054W_28	chrVII	596549	596593	ACG	28	-143	YGR054W
near-YGR054W_148	chrVII	596669	596686	AGG	148	-23	YGR054W
near-YGR054W_127	chrVII	596648	596686	ATA	127	-44	YGR054W
near-YGR054W_86	chrVII	596607	596651	GTG	86	-85	YGR054W
near-YGR054W_75	chrVII	596596	596619	TTG	75	-96	YGR054W
near-YGR054W_89	chrVII	596610	596651	TTG	89	-82	YGR054W
near-YGR071C_39	chrVII	634064	634081	ATC	39	-18	YGR071C
near-YGR078C_10	chrVII	640372	640392	ATA	10	-21	YGR078C
near-YGR082W_17	chrVII	644013	644027	GTG	17	-30	YGR082W
near-YGR085C_10	chrVII	648908	648920	ATA	10	-13	YGR085C
near-YGR086C_67	chrVII	650618	650631	ATC	67	-14	YGR086C
near-YGR086C_50	chrVII	650619	650648	GTG	50	-31	YGR086C
near-YGR086C_43	chrVII	650618	650655	TTG	43	-38	YGR086C
near-YGR090W_101	chrVII	662167	662271	ACG	101	-190	YGR090W
near-YGR090W_248	chrVII	662314	662356	ATA	248	-43	YGR090W
near-YGR090W_198	chrVII	662264	662293	CTG	198	-93	YGR090W
near-YGR090W_120	chrVII	662186	662215	TTG	120	-171	YGR090W
near-YGR090W_135	chrVII	662201	662215	TTG	135	-156	YGR090W
near-YGR090W_182	chrVII	662248	662271	TTG	182	-109	YGR090W
near-YGR095C_29	chrVII	676366	676383	ATA	29	-41	YGR095C
near-YGR100W_7	chrVII	690169	690240	TTG	7	-75	YGR100W
near-YGR105W_20	chrVII	698560	698597	ATA	20	-38	YGR105W
near-YGR106C_25	chrVII	699787	699821	ATA	25	-35	YGR106C
near-YGR108W_157	chrVII	703584	703634	ATA	157	-51	YGR108W
near-YGR108W_120	chrVII	703547	703624	ATT	120	-88	YGR108W
near-YGR108W_82	chrVII	703509	703532	TTG	82	-126	YGR108W
near-YGR109C_12	chrVII	706531	706554	GTG	12	-53	YGR109C
near-YGR119C_43	chrVII	729676	729717	ACG	43	-46	YGR119C
near-YGR119C_34	chrVII	729676	729726	ATT	34	-55	YGR119C
near-YGR124W_9	chrVII	739924	739942	ATA	9	-19	YGR124W
near-YGR130C_90	chrVII	753845	753857	ACG	90	-13	YGR130C
near-YGR134W_52	chrVII	757671	757703	TTG	52	-98	YGR134W
near-YGR135W_60	chrVII	761359	761379	TTG	60	-32	YGR135W
near-YGR138C_171	chrVII	765650	765715	AAG	171	-109	YGR138C
near-YGR138C_151	chrVII	765664	765735	ATT	151	-129	YGR138C
near-YGR138C_176	chrVII	765681	765710	CTG	176	-104	YGR138C
near-YGR138C_39	chrVII	765767	765847	GTG	39	-241	YGR138C
near-YGR138C_152	chrVII	765681	765734	TTG	152	-128	YGR138C
near-YGR138C_219	chrVII	765650	765667	TTG	219	-61	YGR138C
near-YGR138C_33	chrVII	765767	765853	TTG	33	-247	YGR138C
near-YGR146C_168	chrVII	784859	784987	ATA	168	-129	YGR146C
near-YGR146C_228	chrVII	784859	784927	ATA	228	-69	YGR146C
near-YGR146C_231	chrVII	784859	784924	ATT	231	-66	YGR146C
near-YGR146C_66	chrVII	785054	785089	CTG	66	-231	YGR146C
near-YGR146C_124	chrVII	784999	785031	TTG	124	-173	YGR146C
near-YGR146C_72	chrVII	785054	785083	TTG	72	-225	YGR146C
near-YGR156W_44	chrVII	800455	800493	TTG	44	-90	YGR156W
near-YGR157W_214	chrVII	802400	802438	GTG	214	-39	YGR157W
near-YGR157W_67	chrVII	802253	802291	TTG	67	-186	YGR157W
near-YGR158C_37	chrVII	806022	806036	GTG	37	-15	YGR158C
near-YGR161C_20	chrVII	809421	809494	ATT	20	-74	YGR161C
near-YGR161C_28	chrVII	809457	809486	ATT	28	-66	YGR161C
near-YGR167W_10	chrVII	832415	832454	TTG	10	-40	YGR167W
near-YGR169C-A_37	chrVII	836670	836732	ATT	37	-67	YGR169C-A
near-YGR173W_15	chrVII	843824	843852	ATC	15	-29	YGR173W
near-YGR174W-A_181	chrVII	846039	846083	GTG	181	-615	YGR174W-A
near-YGR178C_113	chrVII	853301	853315	AAG	113	-100	YGR178C
near-YGR178C_188	chrVII	853216	853240	AAG	188	-25	YGR178C
near-YGR178C_84	chrVII	853321	853344	ACG	84	-129	YGR178C
near-YGR178C_31	chrVII	853272	853397	ATA	31	-182	YGR178C
near-YGR178C_107	chrVII	853301	853321	ATC	107	-106	YGR178C
near-YGR178C_160	chrVII	853216	853268	CTG	160	-53	YGR178C
near-YGR178C_104	chrVII	853301	853324	TTG	104	-109	YGR178C
near-YGR178C_110	chrVII	853301	853318	TTG	110	-103	YGR178C
near-YGR178C_68	chrVII	853301	853360	TTG	68	-145	YGR178C
near-YGR180C_5	chrVII	856302	856323	ACG	5	-22	YGR180C
near-YGR180C_14	chrVII	856302	856314	ATT	14	-13	YGR180C
near-YGR183C_15	chrVII	859502	859531	TTG	15	-55	YGR183C
near-YGR189C_27	chrVII	878193	878227	ATA	27	-35	YGR189C
near-YGR189C_36	chrVII	878193	878218	ATA	36	-26	YGR189C
near-YGR189C_39	chrVII	878193	878215	ATA	39	-23	YGR189C
near-YGR191W_169	chrVII	880359	880418	ATA	169	-60	YGR191W
near-YGR191W_26	chrVII	880216	880242	CTG	26	-203	YGR191W
near-YGR191W_140	chrVII	880330	880359	TTG	140	-89	YGR191W
near-YGR191W_159	chrVII	880349	880375	TTG	159	-70	YGR191W
near-YGR191W_90	chrVII	880280	880375	TTG	90	-139	YGR191W
near-YGR192C_16	chrVII	883811	883833	ATA	16	-23	YGR192C
near-YGR192C_26	chrVII	883811	883823	ATA	26	-13	YGR192C
near-YGR193C_40	chrVII	885767	885790	TTG	40	-49	YGR193C
near-YGR195W_67	chrVII	888828	888854	ATA	67	-53	YGR195W
near-YGR195W_98	chrVII	888859	888880	ATA	98	-22	YGR195W
near-YGR195W_75	chrVII	888836	888862	ATT	75	-45	YGR195W
near-YGR204W_6	chrVII	905900	905926	ACG	6	-33	YGR204W
near-YGR205W_55	chrVII	909141	909179	ATA	55	-71	YGR205W
near-YGR209C_16	chrVII	913238	913264	ACG	16	-37	YGR209C
near-YGR209C_26	chrVII	913228	913254	ACG	26	-27	YGR209C
near-YGR210C_76	chrVII	914746	914772	CTG	76	-34	YGR210C
near-YGR218W_159	chrVII	932400	932429	ATT	159	-140	YGR218W
near-YGR218W_240	chrVII	932481	932513	ATT	240	-59	YGR218W
near-YGR218W_252	chrVII	932493	932513	ATT	252	-47	YGR218W
near-YGR218W_255	chrVII	932496	932513	ATT	255	-44	YGR218W
near-YGR218W_91	chrVII	932332	932361	ATT	91	-208	YGR218W
near-YGR218W_88	chrVII	932329	932361	CTG	88	-211	YGR218W
near-YGR218W_114	chrVII	932355	932429	TTG	114	-185	YGR218W
near-YGR218W_129	chrVII	932370	932429	TTG	129	-170	YGR218W
near-YGR229C_193	chrVII	950950	950982	ATA	193	-83	YGR229C
near-YGR229C_3	chrVII	951137	951172	CTG	3	-273	YGR229C
near-YGR229C_170	chrVII	950985	951005	TTG	170	-106	YGR229C
near-YGR229C_253	chrVII	950900	950922	TTG	253	-23	YGR229C
near-YGR229C_60	chrVII	951002	951115	TTG	60	-216	YGR229C
near-YGR235C_30	chrVII	962072	962086	CTG	30	-25	YGR235C
near-YGR240C_192	chrVII	973735	973775	AAG	192	-41	YGR240C
near-YGR240C_151	chrVII	973799	973816	AGG	151	-82	YGR240C
near-YGR240C_114	chrVII	973788	973853	ATA	114	-119	YGR240C
near-YGR240C_24	chrVII	973893	973943	ATA	24	-209	YGR240C
near-YGR240C_126	chrVII	973788	973841	ATT	126	-107	YGR240C
near-YGR240C_141	chrVII	973788	973826	ATT	141	-92	YGR240C
near-YGR240C_7	chrVII	973940	973960	ATT	7	-226	YGR240C
near-YGR240C_31	chrVII	973886	973936	CTG	31	-202	YGR240C
near-YGR240C_49	chrVII	973886	973918	TTG	49	-184	YGR240C
near-YGR241C_101	chrVII	976609	976650	ATA	101	-69	YGR241C
near-YGR244C_59	chrVII	979339	979368	TTG	59	-49	YGR244C
near-YGR245C_59	chrVII	982069	982096	CTG	59	-28	YGR245C
near-YGR247W_100	chrVII	984916	984945	TTG	100	-49	YGR247W
near-YGR247W_123	chrVII	984939	984964	TTG	123	-26	YGR247W
near-YGR253C_38	chrVII	999141	999162	TTG	38	-22	YGR253C
near-YGR255C_26	chrVII	1004009	1004029	ATA	26	-67	YGR255C
near-YGR255C_17	chrVII	1004009	1004038	ATT	17	-76	YGR255C
near-YGR255C_29	chrVII	1004009	1004026	ATT	29	-64	YGR255C
near-YGR255C_53	chrVII	1003988	1004002	TTG	53	-40	YGR255C
near-YGR255C_71	chrVII	1003963	1003984	TTG	71	-22	YGR255C
near-YGR257C_67	chrVII	1007306	1007348	ATA	67	-43	YGR257C
near-YGR267C_87	chrVII	1025776	1025823	ATA	87	-88	YGR267C
near-YGR279C_70	chrVII	1049959	1049983	ATA	70	-25	YGR279C
near-YGR279C_18	chrVII	1049959	1050035	ATC	18	-77	YGR279C
near-YGR281W_189	chrVII	1052786	1052822	ATA	189	-37	YGR281W
near-YGR281W_89	chrVII	1052686	1052772	ATA	89	-137	YGR281W
near-YGR281W_150	chrVII	1052747	1052822	GTG	150	-76	YGR281W
near-YGR284C_12	chrVII	1061595	1061618	GTG	12	-28	YGR284C
near-YHL003C_63	chrVIII	101928	101954	GTG	63	-71	YHL003C
near-YHL004W_48	chrVIII	99178	99217	GTG	48	-40	YHL004W
near-YHL011C_45	chrVIII	81645	81671	ATA	45	-55	YHL011C
near-YHL011C_68	chrVIII	81617	81648	CTG	68	-32	YHL011C
near-YHL011C_32	chrVIII	81617	81684	TTG	32	-68	YHL011C
near-YHL020C_33	chrVIII	67475	67507	ATT	33	-51	YHL020C
near-YHL020C_30	chrVIII	67475	67510	CTG	30	-54	YHL020C
near-YHL020C_27	chrVIII	67475	67513	GTG	27	-57	YHL020C
near-YHL027W_59	chrVIII	51071	51088	CTG	59	-39	YHL027W
near-YHL027W_15	chrVIII	51027	51050	TTG	15	-83	YHL027W
near-YHL027W_35	chrVIII	51047	51088	TTG	35	-63	YHL027W
near-YHL034C_17	chrVIII	34159	34179	ATA	17	-102	YHL034C
near-YHL034C_20	chrVIII	34159	34176	ATC	20	-99	YHL034C
near-YHL034C_54	chrVIII	34078	34142	ATC	54	-65	YHL034C
near-YHR002W_90	chrVIII	108753	108810	GTG	90	-58	YHR002W
near-YHR004C_59	chrVIII	113121	113156	TTG	59	-62	YHR004C
near-YHR005C_12	chrVIII	114929	114949	GTG	12	-32	YHR005C
near-YHR007C_40	chrVIII	121762	121785	ATA	40	-102	YHR007C
near-YHR007C_53	chrVIII	121710	121772	ATA	53	-89	YHR007C
near-YHR007C_43	chrVIII	121762	121782	ATT	43	-99	YHR007C
near-YHR008C_11	chrVIII	123591	123613	ATA	11	-23	YHR008C
near-YHR008C_2	chrVIII	123591	123622	TTG	2	-32	YHR008C
near-YHR009C_190	chrVIII	125690	125725	ATC	190	-45	YHR009C
near-YHR009C_11	chrVIII	125887	125904	GTG	11	-224	YHR009C
near-YHR009C_165	chrVIII	125718	125750	GTG	165	-70	YHR009C
near-YHR009C_56	chrVIII	125728	125859	TTG	56	-179	YHR009C
near-YHR009C_86	chrVIII	125728	125829	TTG	86	-149	YHR009C
near-YHR019C_29	chrVIII	143559	143571	ATT	29	-13	YHR019C
near-YHR020W_4	chrVIII	143926	143970	ATC	4	-69	YHR020W
near-YHR021C_7	chrVIII	148670	148697	ATA	7	-28	YHR021C
near-YHR021C_10	chrVIII	148670	148694	ATT	10	-25	YHR021C
near-YHR026W_84	chrVIII	160812	160829	ATA	84	-31	YHR026W
near-YHR026W_35	chrVIII	160763	160842	ATC	35	-80	YHR026W
near-YHR030C_139	chrVIII	170383	170409	ATT	139	-65	YHR030C
near-YHR030C_107	chrVIII	170397	170441	CTG	107	-97	YHR030C
near-YHR030C_73	chrVIII	170383	170475	CTG	73	-131	YHR030C
near-YHR030C_148	chrVIII	170383	170400	TTG	148	-56	YHR030C
near-YHR030C_175	chrVIII	170345	170373	TTG	175	-29	YHR030C
near-YHR030C_64	chrVIII	170383	170484	TTG	64	-140	YHR030C
near-YHR042W_18	chrVIII	190520	190541	GTG	18	-22	YHR042W
near-YHR043C_38	chrVIII	193577	193609	ACG	38	-64	YHR043C
near-YHR043C_56	chrVIII	193577	193591	CTG	56	-46	YHR043C
near-YHR047C_8	chrVIII	201311	201330	TTG	8	-20	YHR047C
near-YHR050W_115	chrVIII	207585	207652	TTG	115	-68	YHR050W
near-YHR050W_46	chrVIII	207516	207533	TTG	46	-137	YHR050W
near-YHR059W_9	chrVIII	220064	220078	TTG	9	-43	YHR059W
near-YHR068W_33	chrVIII	232109	232131	ATA	33	-23	YHR068W
near-YHR068W_13	chrVIII	232089	232131	GTG	13	-43	YHR068W
near-YHR084W_107	chrVIII	273960	273983	ATT	107	-213	YHR084W
near-YHR084W_232	chrVIII	274085	274153	TTG	232	-88	YHR084W
near-YHR086W_71	chrVIII	277998	278021	GTG	71	-154	YHR086W
near-YHR087W_30	chrVIII	280774	280818	CTG	30	-45	YHR087W
near-YHR087W_21	chrVIII	280765	280818	TTG	21	-54	YHR087W
near-YHR089C_2	chrVIII	283299	283328	CTG	2	-30	YHR089C
near-YHR092C_43	chrVIII	288812	288843	TTG	43	-32	YHR092C
near-YHR097C_94	chrVIII	298610	298660	TTG	94	-51	YHR097C
near-YHR098C_34	chrVIII	301935	301980	TTG	34	-46	YHR098C
near-YHR099W_17	chrVIII	302715	302759	ATC	17	-45	YHR099W
near-YHR103W_30	chrVIII	320268	320378	ATA	30	-145	YHR103W
near-YHR104W_42	chrVIII	323351	323371	ACG	42	-57	YHR104W
near-YHR104W_45	chrVIII	323354	323371	ATT	45	-54	YHR104W
near-YHR115C_97	chrVIII	341422	341445	CTG	97	-86	YHR115C
near-YHR115C_136	chrVIII	341360	341406	GTG	136	-47	YHR115C
near-YHR115C_85	chrVIII	341422	341457	TTG	85	-98	YHR115C
near-YHR131C_47	chrVIII	367893	367923	ATC	47	-31	YHR131C
near-YHR131C_37	chrVIII	367895	367933	TTG	37	-41	YHR131C
near-YHR135C_87	chrVIII	374311	374344	ATT	87	-34	YHR135C
near-YHR142W_74	chrVIII	383478	383536	ATC	74	-59	YHR142W
near-YHR142W_117	chrVIII	383521	383535	CTG	117	-16	YHR142W
near-YHR142W_102	chrVIII	383506	383535	TTG	102	-31	YHR142W
near-YHR142W_29	chrVIII	383433	383536	TTG	29	-104	YHR142W
near-YHR143W_200	chrVIII	385441	385494	ATA	200	-68	YHR143W
near-YHR143W_236	chrVIII	385477	385494	ATA	236	-32	YHR143W
near-YHR143W_55	chrVIII	385296	385319	ATA	55	-213	YHR143W
near-YHR143W_216	chrVIII	385457	385474	ATC	216	-52	YHR143W
near-YHR143W_43	chrVIII	385284	385319	CTG	43	-225	YHR143W
near-YHR149C_55	chrVIII	396703	396750	CTG	55	-91	YHR149C
near-YHR149C_99	chrVIII	396683	396706	TTG	99	-47	YHR149C
near-YHR152W_16	chrVIII	401418	401432	ATA	16	-15	YHR152W
near-YHR155W_63	chrVIII	407071	407101	TTG	63	-31	YHR155W
near-YHR162W_16	chrVIII	422910	422948	ATC	16	-161	YHR162W
near-YHR162W_65	chrVIII	422959	423018	ATT	65	-112	YHR162W
near-YHR162W_29	chrVIII	422923	422943	CTG	29	-148	YHR162W
near-YHR162W_121	chrVIII	423015	423059	TTG	121	-56	YHR162W
near-YHR162W_20	chrVIII	422914	422943	TTG	20	-157	YHR162W
near-YHR166C_34	chrVIII	439064	439084	CTG	34	-34	YHR166C
near-YHR167W_27	chrVIII	439316	439339	CTG	27	-25	YHR167W
near-YHR170W_22	chrVIII	443807	443826	TTG	22	-20	YHR170W
near-YHR172W_54	chrVIII	448306	448329	TTG	54	-28	YHR172W
near-YHR179W_17	chrVIII	462477	462500	ATA	17	-24	YHR179W
near-YHR183W_35	chrVIII	470917	470958	ATT	35	-42	YHR183W
near-YHR183W_27	chrVIII	470909	470958	TTG	27	-50	YHR183W
near-YHR183W_30	chrVIII	470912	470958	TTG	30	-47	YHR183W
near-YHR195W_134	chrVIII	490706	490745	ATC	134	-40	YHR195W
near-YHR195W_95	chrVIII	490667	490745	TTG	95	-79	YHR195W
near-YHR196W_22	chrVIII	491898	491929	ATT	22	-32	YHR196W
near-YHR205W_21	chrVIII	508976	508990	ACG	21	-386	YHR205W
near-YHR205W_364	chrVIII	509319	509333	ATT	364	-43	YHR205W
near-YHR205W_68	chrVIII	509023	509091	CTG	68	-339	YHR205W
near-YHR205W_217	chrVIII	509172	509258	GTG	217	-190	YHR205W
near-YHR205W_155	chrVIII	509110	509244	TTG	155	-252	YHR205W
near-YHR205W_235	chrVIII	509190	509258	TTG	235	-172	YHR205W
near-YHR206W_263	chrVIII	512508	512657	CTG	263	-223	YHR206W
near-YHR206W_464	chrVIII	512709	512730	TTG	464	-22	YHR206W
near-YIL002C_64	chrIX	353454	353519	ATA	64	-88	YIL002C
near-YIL002C_38	chrIX	353516	353545	TTG	38	-114	YIL002C
near-YIL005W_59	chrIX	345617	345667	ATT	59	-74	YIL005W
near-YIL005W_77	chrIX	345635	345667	ATT	77	-56	YIL005W
near-YIL008W_1	chrIX	342490	342516	CTG	1	-45	YIL008W
near-YIL014C-A_39	chrIX	325549	325575	TTG	39	-49	YIL014C-A
near-YIL014W_44	chrIX	325972	326019	TTG	44	-130	YIL014W
near-YIL014W_53	chrIX	325981	326019	TTG	53	-121	YIL014W
near-YIL022W_51	chrIX	311106	311163	GTG	51	-58	YIL022W
near-YIL031W_16	chrIX	292478	292525	ATA	16	-154	YIL031W
near-YIL031W_84	chrIX	292546	292631	ATA	84	-86	YIL031W
near-YIL031W_33	chrIX	292495	292631	ATT	33	-137	YIL031W
near-YIL031W_44	chrIX	292506	292589	GTG	44	-126	YIL031W
near-YIL033C_57	chrIX	291679	291720	ATC	57	-51	YIL033C
near-YIL033C_75	chrIX	291679	291702	ATT	75	-33	YIL033C
near-YIL035C_51	chrIX	288940	288957	ATA	51	-49	YIL035C
near-YIL036W_24	chrIX	285539	285619	CTG	24	-126	YIL036W
near-YIL036W_27	chrIX	285542	285619	TTG	27	-123	YIL036W
near-YIL036W_72	chrIX	285587	285619	TTG	72	-78	YIL036W
near-YIL038C_152	chrIX	282653	282738	ATC	152	-86	YIL038C
near-YIL038C_135	chrIX	282681	282755	TTG	135	-103	YIL038C
near-YIL038C_46	chrIX	282689	282844	TTG	46	-192	YIL038C
near-YIL038C_71	chrIX	282653	282819	TTG	71	-167	YIL038C
near-YIL038C_74	chrIX	282653	282816	TTG	74	-164	YIL038C
near-YIL038C_94	chrIX	282689	282796	TTG	94	-144	YIL038C
near-YIL039W_10	chrIX	278406	278424	TTG	10	-19	YIL039W
near-YIL048W_38	chrIX	261169	261207	ACG	38	-267	YIL048W
near-YIL048W_120	chrIX	261251	261346	CTG	120	-185	YIL048W
near-YIL048W_154	chrIX	261285	261338	TTG	154	-151	YIL048W
near-YIL048W_212	chrIX	261343	261381	TTG	212	-93	YIL048W
near-YIL048W_88	chrIX	261219	261254	TTG	88	-217	YIL048W
near-YIL050W_85	chrIX	258883	258903	ACG	85	-29	YIL050W
near-YIL050W_22	chrIX	258820	258903	ATA	22	-92	YIL050W
near-YIL050W_50	chrIX	258848	258911	ATT	50	-64	YIL050W
near-YIL051C_15	chrIX	258281	258294	ATA	15	-14	YIL051C
near-YIL053W_11	chrIX	255097	255113	ATA	11	-17	YIL053W
near-YIL069C_1	chrIX	232372	232413	AAG	1	-44	YIL069C
near-YIL069C_14	chrIX	232370	232400	ACG	14	-31	YIL069C
near-YIL069C_8	chrIX	232370	232406	CTG	8	-37	YIL069C
near-YIL090W_53	chrIX	193509	193541	TTG	53	-85	YIL090W
near-YIL090W_78	chrIX	193534	193587	TTG	78	-60	YIL090W
near-YIL093C_23	chrIX	188788	188844	TTG	23	-60	YIL093C
near-YIL105C_39	chrIX	169702	169743	ATT	39	-102	YIL105C
near-YIL105C_45	chrIX	169702	169737	GTG	45	-96	YIL105C
near-YIL116W_1	chrIX	142858	142917	TTG	1	-69	YIL116W
near-YIL117C_10	chrIX	141602	141625	ATT	10	-56	YIL117C
near-YIL117C_46	chrIX	141570	141589	TTG	46	-20	YIL117C
near-YIL118W_85	chrIX	139722	139750	ATA	85	-29	YIL118W
near-YIL118W_37	chrIX	139674	139750	CTG	37	-77	YIL118W
near-YIL118W_1	chrIX	139638	139750	TTG	1	-113	YIL118W
near-YIL119C_117	chrIX	137947	137961	ATC	117	-84	YIL119C
near-YIL126W_41	chrIX	117950	117979	ATA	41	-41	YIL126W
near-YIL126W_32	chrIX	117941	117979	TTG	32	-50	YIL126W
near-YIL131C_34	chrIX	102236	102258	TTG	34	-23	YIL131C
near-YIL131C_7	chrIX	102236	102285	TTG	7	-50	YIL131C
near-YIL155C_15	chrIX	53723	53737	CTG	15	-29	YIL155C
near-YIL155C_6	chrIX	53723	53746	TTG	6	-38	YIL155C
near-YIR018C-A_6	chrIX	386385	386450	GTG	6	-749	YIR018C-A
near-YIR018C-A_107	chrIX	386275	386349	TTG	107	-648	YIR018C-A
near-YIR034C_1	chrIX	420737	420770	ACG	1	-34	YIR034C
near-YIR037W_31	chrIX	423097	423126	CTG	31	-30	YIR037W
near-YJL001W_5	chrX	435130	435161	TTG	5	-32	YJL001W
near-YJL002C_25	chrX	434656	434682	ACG	25	-31	YJL002C
near-YJL002C_42	chrX	434652	434665	TTG	42	-14	YJL002C
near-YJL003W_18	chrX	432614	432642	CTG	18	-29	YJL003W
near-YJL005W_81	chrX	425097	425155	TTG	81	-59	YJL005W
near-YJL016W_174	chrX	405493	405585	ATC	174	-94	YJL016W
near-YJL016W_93	chrX	405412	405441	TTG	93	-175	YJL016W
near-YJL019W_60	chrX	402853	402895	TTG	60	-43	YJL019W
near-YJL020C_31	chrX	402411	402455	CTG	31	-45	YJL020C
near-YJL026W_20	chrX	392380	392402	ACG	20	-23	YJL026W
near-YJL026W_30	chrX	392390	392402	TTG	30	-13	YJL026W
near-YJL039C_74	chrX	373800	373846	TTG	74	-47	YJL039C
near-YJL041W_42	chrX	365767	365782	CTG	42	-16	YJL041W
near-YJL042W_40	chrX	361220	361247	ATA	40	-28	YJL042W
near-YJL047C_44	chrX	352161	352184	TTG	44	-76	YJL047C
near-YJL052W_14	chrX	338210	338251	TTG	14	-60	YJL052W
near-YJL079C_36	chrX	290843	290902	TTG	36	-128	YJL079C
near-YJL082W_49	chrX	281115	281138	CTG	49	-69	YJL082W
near-YJL082W_27	chrX	281093	281107	TTG	27	-91	YJL082W
near-YJL085W_52	chrX	272789	272825	GTG	52	-37	YJL085W
near-YJL101C_70	chrX	236388	236429	TTG	70	-73	YJL101C
near-YJL110C_39	chrX	211578	211627	ATA	39	-50	YJL110C
near-YJL110C_60	chrX	211578	211606	CTG	60	-29	YJL110C
near-YJL124C_131	chrX	187645	187685	ATA	131	-41	YJL124C
near-YJL124C_109	chrX	187645	187707	ATT	109	-63	YJL124C
near-YJL124C_111	chrX	187682	187705	TTG	111	-61	YJL124C
near-YJL124C_79	chrX	187720	187737	TTG	79	-93	YJL124C
near-YJL127C_33	chrX	184226	184255	GTG	33	-35	YJL127C
near-YJL127C-B_24	chrX	181752	181784	ACG	24	-75	YJL127C-B
near-YJL127C-B_69	chrX	181710	181739	GTG	69	-30	YJL127C-B
near-YJL129C_92	chrX	177424	177501	ATA	92	-195	YJL129C
near-YJL129C_122	chrX	177424	177471	TTG	122	-165	YJL129C
near-YJL129C_131	chrX	177424	177462	TTG	131	-156	YJL129C
near-YJL129C_149	chrX	177424	177444	TTG	149	-138	YJL129C
near-YJL129C_187	chrX	177335	177406	TTG	187	-100	YJL129C
near-YJL129C_51	chrX	177498	177542	TTG	51	-236	YJL129C
near-YJL133W_7	chrX	160548	160574	ATT	7	-70	YJL133W
near-YJL138C_13	chrX	154709	154729	CTG	13	-38	YJL138C
near-YJL140W_25	chrX	150891	150947	TTG	25	-69	YJL140W
near-YJL159W_15	chrX	120409	120423	ATA	15	-39	YJL159W
near-YJL159W_40	chrX	120434	120447	ATA	40	-14	YJL159W
near-YJL164C_38	chrX	111326	111340	ATT	38	-181	YJL164C
near-YJL164C_81	chrX	111214	111297	CTG	81	-138	YJL164C
near-YJL164C_101	chrX	111209	111277	TTG	101	-118	YJL164C
near-YJL164C_110	chrX	111209	111268	TTG	110	-109	YJL164C
near-YJL164C_63	chrX	111214	111315	TTG	63	-156	YJL164C
near-YJL165C_9	chrX	109506	109586	GTG	9	-125	YJL165C
near-YJL166W_16	chrX	106383	106432	ACG	16	-50	YJL166W
near-YJL166W_9	chrX	106376	106399	TTG	9	-57	YJL166W
near-YJL167W_22	chrX	104979	105012	ATA	22	-34	YJL167W
near-YJL167W_31	chrX	104988	105012	ATA	31	-25	YJL167W
near-YJL167W_11	chrX	104968	104982	ATT	11	-45	YJL167W
near-YJL168C_75	chrX	104429	104446	TTG	75	-18	YJL168C
near-YJL171C_10	chrX	100895	100916	ATT	10	-22	YJL171C
near-YJL174W_18	chrX	94994	95026	AAG	18	-97	YJL174W
near-YJL174W_88	chrX	95064	95087	ATC	88	-27	YJL174W
near-YJL174W_98	chrX	95074	95090	GTG	98	-17	YJL174W
near-YJL174W_40	chrX	95016	95087	TTG	40	-75	YJL174W
near-YJL176C_8	chrX	94531	94585	ATA	8	-55	YJL176C
near-YJL183W_47	chrX	84049	84066	GTG	47	-18	YJL183W
near-YJL183W_29	chrX	84031	84066	TTG	29	-36	YJL183W
near-YJL184W_17	chrX	83423	83446	CTG	17	-24	YJL184W
near-YJL208C_33	chrX	41191	41208	ATT	33	-25	YJL208C
near-YJR001W_55	chrX	436784	436800	CTG	55	-17	YJR001W
near-YJR007W_17	chrX	450940	451018	CTG	17	-79	YJR007W
near-YJR007W_35	chrX	450958	451018	TTG	35	-61	YJR007W
near-YJR009C_16	chrX	454682	454713	ATT	16	-32	YJR009C
near-YJR044C_37	chrX	519186	519240	ATA	37	-55	YJR044C
near-YJR044C_43	chrX	519186	519234	ATC	43	-49	YJR044C
near-YJR045C_99	chrX	521603	521642	ATA	99	-40	YJR045C
near-YJR045C_102	chrX	521603	521639	ATT	102	-37	YJR045C
near-YJR045C_77	chrX	521644	521664	TTG	77	-62	YJR045C
near-YJR056C_48	chrX	542503	542620	CTG	48	-118	YJR056C
near-YJR059W_21	chrX	545737	545751	TTG	21	-49	YJR059W
near-YJR085C_9	chrX	585438	585472	ACG	9	-35	YJR085C
near-YJR085C_16	chrX	585438	585465	TTG	16	-28	YJR085C
near-YJR090C_72	chrX	594473	594547	ATA	72	-220	YJR090C
near-YJR090C_162	chrX	594328	594457	ATT	162	-130	YJR090C
near-YJR090C_75	chrX	594473	594544	ATT	75	-217	YJR090C
near-YJR090C_201	chrX	594328	594418	TTG	201	-91	YJR090C
near-YJR099W_59	chrX	615517	615540	AAG	59	-58	YJR099W
near-YJR099W_89	chrX	615547	615567	ATC	89	-28	YJR099W
near-YJR099W_33	chrX	615491	615508	GTG	33	-84	YJR099W
near-YJR101W_20	chrX	618157	618198	ATA	20	-76	YJR101W
near-YJR104C_22	chrX	623021	623035	ATA	22	-21	YJR104C
near-YJR109C_22	chrX	632956	632982	ATA	22	-41	YJR109C
near-YJR116W_21	chrX	640737	640763	ATA	21	-87	YJR116W
near-YJR143C_30	chrX	700615	700643	ATA	30	-29	YJR143C
near-YJR148W_10	chrX	705696	705710	ATT	10	-47	YJR148W
near-YKL002W_41	chrXI	437741	437773	CTG	41	-36	YKL002W
near-YKL004W_67	chrXI	435290	435355	ATT	67	-289	YKL004W
near-YKL004W_232	chrXI	435455	435496	CTG	232	-124	YKL004W
near-YKL004W_55	chrXI	435278	435355	CTG	55	-301	YKL004W
near-YKL004W_110	chrXI	435333	435383	TTG	110	-246	YKL004W
near-YKL004W_184	chrXI	435407	435496	TTG	184	-172	YKL004W
near-YKL004W_72	chrXI	435295	435312	TTG	72	-284	YKL004W
near-YKL005C_27	chrXI	434963	434977	TTG	27	-100	YKL005C
near-YKL009W_4	chrXI	426203	426240	CTG	4	-38	YKL009W
near-YKL015W_46	chrXI	408491	408511	CTG	46	-52	YKL015W
near-YKL033W-A_37	chrXI	374465	374482	ATA	37	-39	YKL033W-A
near-YKL033W-A_17	chrXI	374445	374462	CTG	17	-59	YKL033W-A
near-YKL033W-A_31	chrXI	374459	374482	TTG	31	-45	YKL033W-A
near-YKL039W_7	chrXI	362510	362590	CTG	7	-111	YKL039W
near-YKL041W_76	chrXI	360124	360141	ATA	76	-18	YKL041W
near-YKL046C_108	chrXI	352729	352749	ACG	108	-125	YKL046C
near-YKL053C-A_42	chrXI	339443	339486	TTG	42	-44	YKL053C-A
near-YKL053C-A_54	chrXI	339443	339474	TTG	54	-32	YKL053C-A
near-YKL054C_40	chrXI	338776	338823	ATA	40	-70	YKL054C
near-YKL054C_31	chrXI	338776	338832	ATC	31	-79	YKL054C
near-YKL056C_15	chrXI	334916	334943	ATT	15	-28	YKL056C
near-YKL056C_2	chrXI	334939	334956	TTG	2	-41	YKL056C
near-YKL060C_11	chrXI	327488	327500	ATA	11	-13	YKL060C
near-YKL063C_66	chrXI	321595	321618	ATA	66	-100	YKL063C
near-YKL063C_119	chrXI	321542	321565	CTG	119	-47	YKL063C
near-YKL063C_7	chrXI	321582	321677	GTG	7	-159	YKL063C
near-YKL064W_57	chrXI	317671	317691	TTG	57	-92	YKL064W
near-YKL068W_75	chrXI	310153	310170	TTG	75	-45	YKL068W
near-YKL077W_36	chrXI	291424	291451	CTG	36	-28	YKL077W
near-YKL087C_68	chrXI	277864	277894	GTG	68	-31	YKL087C
near-YKL092C_21	chrXI	269460	269514	CTG	21	-55	YKL092C
near-YKL096W-A_16	chrXI	259220	259240	ATC	16	-32	YKL096W-A
near-YKL099C_6	chrXI	256521	256541	AAG	6	-69	YKL099C
near-YKL099C_9	chrXI	256521	256538	TTG	9	-66	YKL099C
near-YKL104C_178	chrXI	245374	245397	ATC	178	-24	YKL104C
near-YKL104C_23	chrXI	245374	245552	ATT	23	-179	YKL104C
near-YKL104C_120	chrXI	245417	245455	CTG	120	-82	YKL104C
near-YKL106W_38	chrXI	237473	237499	TTG	38	-62	YKL106W
near-YKL106W_61	chrXI	237496	237534	TTG	61	-39	YKL106W
near-YKL112W_78	chrXI	226480	226494	ATT	78	-89	YKL112W
near-YKL112W_111	chrXI	226513	226530	GTG	111	-56	YKL112W
near-YKL117W_11	chrXI	220303	220317	ATC	11	-20	YKL117W
near-YKL120W_27	chrXI	217293	217342	ATA	27	-50	YKL120W
near-YKL120W_7	chrXI	217273	217296	ATA	7	-70	YKL120W
near-YKL120W_54	chrXI	217320	217342	ATC	54	-23	YKL120W
near-YKL125W_24	chrXI	208187	208210	ACG	24	-59	YKL125W
near-YKL125W_9	chrXI	208172	208210	ATT	9	-74	YKL125W
near-YKL126W_105	chrXI	205603	205656	ATA	105	-103	YKL126W
near-YKL126W_138	chrXI	205636	205656	TTG	138	-70	YKL126W
near-YKL126W_35	chrXI	205533	205613	TTG	35	-173	YKL126W
near-YKL126W_68	chrXI	205566	205613	TTG	68	-140	YKL126W
near-YKL126W_73	chrXI	205571	205588	TTG	73	-135	YKL126W
near-YKL138C_50	chrXI	185682	185717	ACG	50	-36	YKL138C
near-YKL140W_120	chrXI	180624	180674	ATT	120	-154	YKL140W
near-YKL140W_129	chrXI	180633	180674	TTG	129	-145	YKL140W
near-YKL142W_2	chrXI	178458	178499	ATA	2	-56	YKL142W
near-YKL148C_44	chrXI	171199	171237	ATA	44	-108	YKL148C
near-YKL150W_17	chrXI	166506	166520	ACG	17	-37	YKL150W
near-YKL150W_33	chrXI	166522	166542	ATA	33	-21	YKL150W
near-YKL161C_49	chrXI	150688	150706	AAG	49	-19	YKL161C
near-YKL163W_796	chrXI	144384	144399	CTG	796	-16	YKL163W
near-YKL164C_58	chrXI	142820	142836	ATA	58	-17	YKL164C
near-YKL171W_38	chrXI	127435	127473	ACG	38	-39	YKL171W
near-YKL171W_60	chrXI	127457	127473	ACG	60	-17	YKL171W
near-YKL174C_6	chrXI	122263	122316	TTG	6	-80	YKL174C
near-YKL175W_28	chrXI	118774	118791	GTG	28	-18	YKL175W
near-YKL176C_64	chrXI	118209	118268	TTG	64	-282	YKL176C
near-YKL181W_136	chrXI	107275	107314	ATT	136	-40	YKL181W
near-YKL181W_32	chrXI	107171	107254	CTG	32	-144	YKL181W
near-YKL181W_60	chrXI	107199	107288	TTG	60	-116	YKL181W
near-YKL183W_88	chrXI	98665	98706	GTG	88	-55	YKL183W
near-YKL183W_43	chrXI	98620	98652	TTG	43	-100	YKL183W
near-YKL184W_142	chrXI	96738	96755	TTG	142	-18	YKL184W
near-YKL185W_172	chrXI	94322	94497	ATC	172	-176	YKL185W
near-YKL185W_228	chrXI	94378	94434	ATT	228	-120	YKL185W
near-YKL185W_25	chrXI	94175	94225	ATT	25	-323	YKL185W
near-YKL185W_195	chrXI	94345	94434	CTG	195	-153	YKL185W
near-YKL185W_15	chrXI	94165	94230	TTG	15	-333	YKL185W
near-YKL189W_54	chrXI	84658	84702	ATT	54	-45	YKL189W
near-YKL192C_6	chrXI	80538	80556	ATA	6	-19	YKL192C
near-YKL212W_161	chrXI	34502	34541	ACG	161	-40	YKL212W
near-YKL212W_131	chrXI	34472	34541	AGG	131	-70	YKL212W
near-YKL212W_122	chrXI	34463	34541	ATA	122	-79	YKL212W
near-YKL212W_152	chrXI	34493	34541	ATA	152	-49	YKL212W
near-YKL212W_134	chrXI	34475	34541	ATT	134	-67	YKL212W
near-YKL212W_39	chrXI	34380	34418	CTG	39	-162	YKL212W
near-YKL212W_74	chrXI	34415	34541	TTG	74	-127	YKL212W
near-YKL212W_80	chrXI	34421	34541	TTG	80	-121	YKL212W
near-YKR001C_2	chrXI	442723	442755	ACG	2	-33	YKR001C
near-YKR002W_105	chrXI	443131	443145	ATA	105	-100	YKR002W
near-YKR002W_172	chrXI	443198	443212	ATA	172	-33	YKR002W
near-YKR002W_25	chrXI	443051	443074	ATA	25	-180	YKR002W
near-YKR002W_14	chrXI	443040	443126	CTG	14	-191	YKR002W
near-YKR002W_62	chrXI	443088	443126	GTG	62	-143	YKR002W
near-YKR003W_60	chrXI	445351	445368	TTG	60	-29	YKR003W
near-YKR013W_3	chrXI	463921	463957	ATA	3	-37	YKR013W
near-YKR014C_124	chrXI	466072	466090	ACG	124	-19	YKR014C
near-YKR014C_72	chrXI	466072	466142	ATT	72	-71	YKR014C
near-YKR014C_15	chrXI	466176	466199	CTG	15	-128	YKR014C
near-YKR016W_18	chrXI	469688	469708	TTG	18	-28	YKR016W
near-YKR026C_80	chrXI	489656	489681	ACG	80	-26	YKR026C
near-YKR026C_47	chrXI	489656	489714	ATA	47	-59	YKR026C
near-YKR026C_54	chrXI	489656	489707	TTG	54	-52	YKR026C
near-YKR042W_139	chrXI	519458	519472	ATA	139	-68	YKR042W
near-YKR042W_172	chrXI	519491	519525	ATT	172	-35	YKR042W
near-YKR042W_187	chrXI	519506	519525	ATT	187	-20	YKR042W
near-YKR042W_133	chrXI	519452	519472	TTG	133	-74	YKR042W
near-YKR045C_13	chrXI	523970	523984	AGG	13	-15	YKR045C
near-YKR047W_145	chrXI	524298	524369	TTG	145	-958	YKR047W
near-YKR047W_73	chrXI	524226	524369	TTG	73	-1030	YKR047W
near-YKR050W_211	chrXI	527076	527114	GTG	211	-738	YKR050W
near-YKR051W_10	chrXI	530838	530879	ATC	10	-107	YKR051W
near-YKR057W_11	chrXI	551637	551655	ATA	11	-19	YKR057W
near-YKR058W_147	chrXI	552735	552758	AGG	147	-34	YKR058W
near-YKR062W_8	chrXI	559612	559629	CTG	8	-53	YKR062W
near-YKR067W_66	chrXI	567876	567916	ATA	66	-41	YKR067W
near-YKR067W_75	chrXI	567885	567916	ATT	75	-32	YKR067W
near-YKR068C_24	chrXI	570910	570933	TTG	24	-24	YKR068C
near-YKR069W_39	chrXI	571488	571535	ATA	39	-123	YKR069W
near-YKR076W_32	chrXI	582237	582278	GTG	32	-45	YKR076W
near-YKR079C_162	chrXI	589306	589347	ACG	162	-42	YKR079C
near-YKR079C_42	chrXI	589306	589467	CTG	42	-162	YKR079C
near-YKR079C_75	chrXI	589306	589434	TTG	75	-129	YKR079C
near-YKR080W_13	chrXI	590349	590381	ATT	13	-45	YKR080W
near-YKR096W_5	chrXI	626723	626749	ATT	5	-69	YKR096W
near-YKR098C_87	chrXI	635185	635229	TTG	87	-50	YKR098C
near-YKR099W_114	chrXI	635707	635790	CTG	114	-143	YKR099W
near-YKR100C_169	chrXI	640091	640150	ACG	169	-182	YKR100C
near-YKR100C_173	chrXI	640099	640146	ATA	173	-178	YKR100C
near-YKR100C_329	chrXI	639969	639990	ATC	329	-22	YKR100C
near-YKR100C_119	chrXI	640099	640200	ATT	119	-232	YKR100C
near-YKR100C_42	chrXI	640257	640277	ATT	42	-309	YKR100C
near-YLL009C_7	chrXII	131436	131459	ATT	7	-45	YLL009C
near-YLL010C_37	chrXII	130804	130818	ATA	37	-205	YLL010C
near-YLL010C_148	chrXII	130636	130707	ATC	148	-94	YLL010C
near-YLL010C_113	chrXII	130716	130742	CTG	113	-129	YLL010C
near-YLL010C_28	chrXII	130804	130827	CTG	28	-214	YLL010C
near-YLL010C_124	chrXII	130711	130731	GTG	124	-118	YLL010C
near-YLL010C_48	chrXII	130751	130807	TTG	48	-194	YLL010C
near-YLL010C_65	chrXII	130716	130790	TTG	65	-177	YLL010C
near-YLL013C_124	chrXII	124800	124832	AAG	124	-118	YLL013C
near-YLL013C_142	chrXII	124800	124814	CTG	142	-100	YLL013C
near-YLL013C_70	chrXII	124800	124886	CTG	70	-172	YLL013C
near-YLL013C_109	chrXII	124800	124847	TTG	109	-133	YLL013C
near-YLL021W_70	chrXII	100864	100887	ACG	70	-82	YLL021W
near-YLL021W_105	chrXII	100899	100922	ATA	105	-47	YLL021W
near-YLL024C_6	chrXII	97486	97509	ATT	6	-24	YLL024C
near-YLL026W_10	chrXII	88576	88621	AAG	10	-46	YLL026W
near-YLL026W_31	chrXII	88597	88621	ACG	31	-25	YLL026W
near-YLL026W_38	chrXII	88604	88621	ATA	38	-18	YLL026W
near-YLL026W_22	chrXII	88588	88621	ATC	22	-34	YLL026W
near-YLL027W_65	chrXII	87261	87350	CTG	65	-141	YLL027W
near-YLL029W_54	chrXII	81411	81440	ACG	54	-49	YLL029W
near-YLL039C_46	chrXII	65214	65258	ACG	46	-51	YLL039C
near-YLL039C_19	chrXII	65214	65285	ATA	19	-78	YLL039C
near-YLL039C_34	chrXII	65214	65270	ATC	34	-63	YLL039C
near-YLR006C_146	chrXII	163896	163922	ACG	146	-29	YLR006C
near-YLR006C_139	chrXII	163894	163929	ATC	139	-36	YLR006C
near-YLR006C_26	chrXII	163896	164042	TTG	26	-149	YLR006C
near-YLR008C_62	chrXII	166084	166119	ATA	62	-36	YLR008C
near-YLR009W_25	chrXII	166421	166447	TTG	25	-115	YLR009W
near-YLR019W_280	chrXII	180261	180286	AGG	280	-26	YLR019W
near-YLR019W_176	chrXII	180157	180234	ATA	176	-130	YLR019W
near-YLR019W_224	chrXII	180205	180234	ATT	224	-82	YLR019W
near-YLR019W_206	chrXII	180187	180234	TTG	206	-100	YLR019W
near-YLR019W_237	chrXII	180218	180238	TTG	237	-69	YLR019W
near-YLR019W_77	chrXII	180058	180108	TTG	77	-229	YLR019W
near-YLR023C_44	chrXII	187255	187278	ATT	44	-149	YLR023C
near-YLR023C_35	chrXII	187255	187287	TTG	35	-158	YLR023C
near-YLR023C_64	chrXII	187169	187258	TTG	64	-129	YLR023C
near-YLR023C_82	chrXII	187169	187240	TTG	82	-111	YLR023C
near-YLR023C_87	chrXII	187215	187235	TTG	87	-106	YLR023C
near-YLR025W_23	chrXII	194400	194447	TTG	23	-51	YLR025W
near-YLR026C_85	chrXII	196473	196502	ACG	85	-30	YLR026C
near-YLR026C_76	chrXII	196473	196511	CTG	76	-39	YLR026C
near-YLR028C_114	chrXII	201340	201354	ATA	114	-39	YLR028C
near-YLR028C_108	chrXII	201340	201360	ATC	108	-45	YLR028C
near-YLR028C_71	chrXII	201344	201397	ATT	71	-82	YLR028C
near-YLR034C_95	chrXII	211968	212003	CTG	95	-70	YLR034C
near-YLR040C_32	chrXII	229583	229614	ATT	32	-32	YLR040C
near-YLR044C_7	chrXII	234082	234104	ATA	7	-23	YLR044C
near-YLR047C_220	chrXII	241408	241435	CTG	220	-28	YLR047C
near-YLR056W_45	chrXII	253827	253850	ATA	45	-33	YLR056W
near-YLR079W_15	chrXII	286794	286818	TTG	15	-25	YLR079W
near-YLR083C_105	chrXII	296095	296153	ATA	105	-59	YLR083C
near-YLR089C_270	chrXII	320016	320049	ATA	270	-34	YLR089C
near-YLR089C_146	chrXII	320016	320173	CTG	146	-158	YLR089C
near-YLR089C_191	chrXII	320016	320128	TTG	191	-113	YLR089C
near-YLR089C_254	chrXII	320016	320065	TTG	254	-50	YLR089C
near-YLR089C_290	chrXII	320016	320029	TTG	290	-14	YLR089C
near-YLR093C_4	chrXII	327443	327484	TTG	4	-69	YLR093C
near-YLR096W_36	chrXII	332427	332504	ACG	36	-162	YLR096W
near-YLR099C_55	chrXII	340929	340973	TTG	55	-45	YLR099C
near-YLR109W_21	chrXII	368764	368779	ATA	21	-16	YLR109W
near-YLR110C_19	chrXII	370099	370122	ATT	19	-24	YLR110C
near-YLR110C_14	chrXII	370113	370127	CTG	14	-29	YLR110C
near-YLR113W_45	chrXII	371490	371513	ATA	45	-129	YLR113W
near-YLR120C_41	chrXII	388272	388292	ATA	41	-72	YLR120C
near-YLR130C_7	chrXII	404145	404171	CTG	7	-109	YLR130C
near-YLR130C_94	chrXII	404063	404084	GTG	94	-22	YLR130C
near-YLR130C_10	chrXII	404145	404168	TTG	10	-106	YLR130C
near-YLR130C_36	chrXII	404063	404142	TTG	36	-80	YLR130C
near-YLR130C_78	chrXII	404063	404100	TTG	78	-38	YLR130C
near-YLR138W_73	chrXII	418355	418420	ATT	73	-81	YLR138W
near-YLR149C_23	chrXII	439849	439869	GTG	23	-46	YLR149C
near-YLR150W_8	chrXII	440448	440465	ATA	8	-18	YLR150W
near-YLR152C_109	chrXII	444710	444748	AAG	109	-60	YLR152C
near-YLR167W_38	chrXII	498927	498945	ATT	38	-19	YLR167W
near-YLR167W_10	chrXII	498899	498945	TTG	10	-47	YLR167W
near-YLR167W_41	chrXII	498930	498945	TTG	41	-16	YLR167W
near-YLR178C_13	chrXII	513822	513882	TTG	13	-61	YLR178C
near-YLR179C_46	chrXII	514714	514744	ATC	46	-31	YLR179C
near-YLR186W_16	chrXII	523590	523619	ATA	16	-41	YLR186W
near-YLR187W_46	chrXII	524679	524714	ATA	46	-185	YLR187W
near-YLR187W_163	chrXII	524796	524863	TTG	163	-68	YLR187W
near-YLR187W_94	chrXII	524727	524771	TTG	94	-137	YLR187W
near-YLR190W_60	chrXII	534953	534973	CTG	60	-260	YLR190W
near-YLR190W_14	chrXII	534907	535023	TTG	14	-306	YLR190W
near-YLR190W_77	chrXII	534970	535023	TTG	77	-243	YLR190W
near-YLR190W_86	chrXII	534979	535023	TTG	86	-234	YLR190W
near-YLR199C_12	chrXII	548787	548804	ATC	12	-35	YLR199C
near-YLR203C_31	chrXII	551961	551985	TTG	31	-25	YLR203C
near-YLR206W_77	chrXII	554557	554576	GTG	77	-20	YLR206W
near-YLR206W_20	chrXII	554500	554556	TTG	20	-77	YLR206W
near-YLR206W_50	chrXII	554530	554556	TTG	50	-47	YLR206W
near-YLR206W_59	chrXII	554539	554556	TTG	59	-38	YLR206W
near-YLR208W_39	chrXII	559499	559531	ATA	39	-51	YLR208W
near-YLR208W_42	chrXII	559502	559531	ATA	42	-48	YLR208W
near-YLR208W_61	chrXII	559521	559549	ATA	61	-29	YLR208W
near-YLR208W_32	chrXII	559492	559524	CTG	32	-58	YLR208W
near-YLR208W_19	chrXII	559479	559499	TTG	19	-71	YLR208W
near-YLR219W_112	chrXII	574067	574147	TTG	112	-83	YLR219W
near-YLR219W_121	chrXII	574076	574147	TTG	121	-74	YLR219W
near-YLR219W_52	chrXII	574007	574147	TTG	52	-143	YLR219W
near-YLR220W_100	chrXII	576771	576823	TTG	100	-53	YLR220W
near-YLR223C_202	chrXII	585534	585608	ATA	202	-118	YLR223C
near-YLR223C_238	chrXII	585534	585572	TTG	238	-82	YLR223C
near-YLR224W_124	chrXII	586440	586462	AAG	124	-23	YLR224W
near-YLR224W_13	chrXII	586329	586462	TTG	13	-134	YLR224W
near-YLR228C_20	chrXII	602626	602646	ATT	20	-183	YLR228C
near-YLR229C_72	chrXII	604850	604924	ATA	72	-137	YLR229C
near-YLR229C_36	chrXII	604850	604960	CTG	36	-173	YLR229C
near-YLR229C_21	chrXII	604850	604975	GTG	21	-188	YLR229C
near-YLR248W_6	chrXII	634202	634250	ATT	6	-49	YLR248W
near-YLR250W_29	chrXII	640301	640315	ATT	29	-15	YLR250W
near-YLR254C_55	chrXII	644974	645019	TTG	55	-46	YLR254C
near-YLR256W_116	chrXII	646235	646375	CTG	116	-179	YLR256W
near-YLR256W_174	chrXII	646293	646367	TTG	174	-121	YLR256W
near-YLR256W_48	chrXII	646167	646238	TTG	48	-247	YLR256W
near-YLR257W_173	chrXII	658794	658824	ATA	173	-31	YLR257W
near-YLR257W_90	chrXII	658711	658779	ATA	90	-114	YLR257W
near-YLR257W_182	chrXII	658803	658824	ATC	182	-22	YLR257W
near-YLR257W_125	chrXII	658746	658790	ATT	125	-79	YLR257W
near-YLR257W_155	chrXII	658776	658790	GTG	155	-49	YLR257W
near-YLR257W_10	chrXII	658631	658675	TTG	10	-194	YLR257W
near-YLR257W_117	chrXII	658738	658779	TTG	117	-87	YLR257W
near-YLR257W_138	chrXII	658759	658779	TTG	138	-66	YLR257W
near-YLR257W_68	chrXII	658689	658790	TTG	68	-136	YLR257W
near-YLR257W_83	chrXII	658704	658790	TTG	83	-121	YLR257W
near-YLR258W_29	chrXII	660677	660714	GTG	29	-38	YLR258W
near-YLR258W_41	chrXII	660689	660714	TTG	41	-26	YLR258W
near-YLR259C_13	chrXII	665003	665023	ATA	13	-21	YLR259C
near-YLR260W_50	chrXII	665765	665818	AAG	50	-78	YLR260W
near-YLR262C-A_2	chrXII	669663	669682	CTG	2	-20	YLR262C-A
near-YLR268W_13	chrXII	680164	680196	GTG	13	-35	YLR268W
near-YLR270W_71	chrXII	681164	681184	ACG	71	-21	YLR270W
near-YLR271W_62	chrXII	682445	682474	CTG	62	-291	YLR271W
near-YLR276C_41	chrXII	696859	696885	ATT	41	-55	YLR276C
near-YLR276C_75	chrXII	696831	696851	CTG	75	-21	YLR276C
near-YLR277C_69	chrXII	699545	699574	TTG	69	-79	YLR277C
near-YLR286C_122	chrXII	710159	710245	ATA	122	-109	YLR286C
near-YLR286C_44	chrXII	710285	710323	ATA	44	-187	YLR286C
near-YLR286C_16	chrXII	710295	710351	ATT	16	-215	YLR286C
near-YLR286C_22	chrXII	710295	710345	ATT	22	-209	YLR286C
near-YLR286C_50	chrXII	710285	710317	TTG	50	-181	YLR286C
near-YLR287C_23	chrXII	712059	712102	ACG	23	-44	YLR287C
near-YLR291C_18	chrXII	719463	719476	TTG	18	-14	YLR291C
near-YLR293C_24	chrXII	721431	721443	ATT	24	-13	YLR293C
near-YLR297W_71	chrXII	724015	724042	ACG	71	-28	YLR297W
near-YLR297W_64	chrXII	724008	724025	ATA	64	-35	YLR297W
near-YLR299W_140	chrXII	726015	726067	TTG	140	-53	YLR299W
near-YLR300W_17	chrXII	728873	728899	ACG	17	-81	YLR300W
near-YLR300W_56	chrXII	728912	728941	ATT	56	-42	YLR300W
near-YLR300W_36	chrXII	728892	728912	TTG	36	-62	YLR300W
near-YLR300W_61	chrXII	728917	728937	TTG	61	-37	YLR300W
near-YLR304C_19	chrXII	737549	737568	ATT	19	-20	YLR304C
near-YLR314C_20	chrXII	764147	764182	ATC	20	-45	YLR314C
near-YLR314C_32	chrXII	764147	764170	CTG	32	-33	YLR314C
near-YLR327C_13	chrXII	783434	783448	AAG	13	-61	YLR327C
near-YLR327C_11	chrXII	783406	783450	ATA	11	-63	YLR327C
near-YLR327C_34	chrXII	783388	783427	ATT	34	-40	YLR327C
near-YLR327C_48	chrXII	783388	783413	ATT	48	-26	YLR327C
near-YLR332W_256	chrXII	790560	790616	ACG	256	-115	YLR332W
near-YLR332W_262	chrXII	790566	790616	ACG	262	-109	YLR332W
near-YLR332W_341	chrXII	790645	790674	ATT	341	-30	YLR332W
near-YLR332W_47	chrXII	790351	790443	ATT	47	-324	YLR332W
near-YLR332W_82	chrXII	790386	790421	ATT	82	-289	YLR332W
near-YLR332W_10	chrXII	790314	790346	TTG	10	-361	YLR332W
near-YLR332W_175	chrXII	790479	790517	TTG	175	-196	YLR332W
near-YLR332W_335	chrXII	790639	790674	TTG	335	-36	YLR332W
near-YLR333C_120	chrXII	796197	796247	ATT	120	-348	YLR333C
near-YLR337C_28	chrXII	805108	805143	TTG	28	-37	YLR337C
near-YLR340W_36	chrXII	805862	805885	ATA	36	-24	YLR340W
near-YLR340W_19	chrXII	805845	805862	ATC	19	-41	YLR340W
near-YLR340W_22	chrXII	805848	805862	CTG	22	-38	YLR340W
near-YLR342W_190	chrXII	809929	809949	ACG	190	-67	YLR342W
near-YLR342W_27	chrXII	809766	809792	ACG	27	-230	YLR342W
near-YLR342W_147	chrXII	809886	809903	ATA	147	-110	YLR342W
near-YLR342W_164	chrXII	809903	809920	ATA	164	-93	YLR342W
near-YLR342W_241	chrXII	809980	809995	ATA	241	-16	YLR342W
near-YLR342W_229	chrXII	809968	809995	ATC	229	-28	YLR342W
near-YLR342W_177	chrXII	809916	809954	ATT	177	-80	YLR342W
near-YLR342W_39	chrXII	809778	809792	ATT	39	-218	YLR342W
near-YLR342W_224	chrXII	809963	809995	CTG	224	-33	YLR342W
near-YLR345W_11	chrXII	820450	820476	CTG	11	-60	YLR345W
near-YLR347C_28	chrXII	826443	826505	ATT	28	-92	YLR347C
near-YLR347C_21	chrXII	826465	826512	CTG	21	-99	YLR347C
near-YLR350W_56	chrXII	828683	828728	ACG	56	-46	YLR350W
near-YLR350W_71	chrXII	828698	828728	ATT	71	-31	YLR350W
near-YLR354C_28	chrXII	837358	837370	ATA	28	-13	YLR354C
near-YLR355C_24	chrXII	839264	839308	ATT	24	-55	YLR355C
near-YLR359W_28	chrXII	844202	844249	ATT	28	-79	YLR359W
near-YLR371W_146	chrXII	862661	862678	GTG	146	-52	YLR371W
near-YLR372W_100	chrXII	867309	867352	ATT	100	-44	YLR372W
near-YLR372W_121	chrXII	867330	867352	TTG	121	-23	YLR372W
near-YLR372W_50	chrXII	867259	867273	TTG	50	-94	YLR372W
near-YLR372W_61	chrXII	867270	867305	TTG	61	-83	YLR372W
near-YLR378C_30	chrXII	877312	877353	ATT	30	-175	YLR378C
near-YLR378C_12	chrXII	877312	877371	TTG	12	-193	YLR378C
near-YLR387C_3	chrXII	897707	897721	ATT	3	-49	YLR387C
near-YLR387C_7	chrXII	897676	897717	TTG	7	-45	YLR387C
near-YLR388W_10	chrXII	898130	898150	ATA	10	-520	YLR388W
near-YLR407W_126	chrXII	932848	932889	CTG	126	-118	YLR407W
near-YLR407W_190	chrXII	932912	932956	TTG	190	-54	YLR407W
near-YLR414C_58	chrXII	954182	954196	ATA	58	-52	YLR414C
near-YLR414C_18	chrXII	954201	954236	ATC	18	-92	YLR414C
near-YLR414C_29	chrXII	954205	954225	CTG	29	-81	YLR414C
near-YLR414C_39	chrXII	954201	954215	GTG	39	-71	YLR414C
near-YLR414C_46	chrXII	954182	954208	TTG	46	-64	YLR414C
near-YLR421C_5	chrXII	965578	965592	CTG	5	-32	YLR421C
near-YLR430W_192	chrXII	993327	993432	ATC	192	-106	YLR430W
near-YLR430W_47	chrXII	993182	993259	TTG	47	-251	YLR430W
near-YLR432W_52	chrXII	1002492	1002555	ATC	52	-64	YLR432W
near-YLR432W_33	chrXII	1002473	1002532	ATT	33	-83	YLR432W
near-YLR432W_76	chrXII	1002516	1002555	ATT	76	-40	YLR432W
near-YLR432W_83	chrXII	1002523	1002555	GTG	83	-33	YLR432W
near-YLR440C_38	chrXII	1017698	1017728	TTG	38	-31	YLR440C
near-YLR441C_6	chrXII	1018909	1018930	ACG	6	-22	YLR441C
near-YLR443W_47	chrXII	1022534	1022623	CTG	47	-90	YLR443W
near-YLR447C_20	chrXII	1027894	1027918	ATC	20	-25	YLR447C
near-YLR449W_24	chrXII	1030818	1030832	ATA	24	-15	YLR449W
near-YLR450W_24	chrXII	1032492	1032548	GTG	24	-134	YLR450W
near-YLR450W_16	chrXII	1032484	1032561	TTG	16	-142	YLR450W
near-YLR454W_20	chrXII	1043901	1043942	ACG	20	-96	YLR454W
near-YML001W_19	chrXIII	267099	267172	ATA	19	-74	YML001W
near-YML001W_1	chrXIII	267081	267172	TTG	1	-92	YML001W
near-YML006C_109	chrXIII	258417	258461	ACG	109	-45	YML006C
near-YML017W_47	chrXIII	236564	236586	ATA	47	-23	YML017W
near-YML018C_12	chrXIII	235953	236071	TTG	12	-119	YML018C
near-YML018C_38	chrXIII	236016	236045	TTG	38	-93	YML018C
near-YML034W_40	chrXIII	209496	209516	ACG	40	-28	YML034W
near-YML034W_7	chrXIII	209463	209516	GTG	7	-61	YML034W
near-YML035C_77	chrXIII	208885	208947	TTG	77	-87	YML035C
near-YML038C_57	chrXIII	204104	204200	CTG	57	-97	YML038C
near-YML038C_118	chrXIII	204104	204139	GTG	118	-36	YML038C
near-YML038C_139	chrXIII	204104	204118	GTG	139	-15	YML038C
near-YML038C_100	chrXIII	204104	204157	TTG	100	-54	YML038C
near-YML038C_106	chrXIII	204104	204151	TTG	106	-48	YML038C
near-YML038C_27	chrXIII	204104	204230	TTG	27	-127	YML038C
near-YML046W_44	chrXIII	181429	181472	TTG	44	-44	YML046W
near-YML053C_69	chrXIII	169755	169768	GTG	69	-14	YML053C
near-YML056C_27	chrXIII	164177	164203	TTG	27	-27	YML056C
near-YML057W_42	chrXIII	160138	160178	ATA	42	-41	YML057W
near-YML058W_9	chrXIII	159369	159381	ATA	9	-13	YML058W
near-YML058W_2	chrXIII	159362	159381	CTG	2	-20	YML058W
near-YML070W_13	chrXIII	133443	133460	ATT	13	-31	YML070W
near-YML070W_18	chrXIII	133448	133473	ATT	18	-26	YML070W
near-YML072C_154	chrXIII	129368	129383	TTG	154	-16	YML072C
near-YML072C_19	chrXIII	129495	129518	TTG	19	-151	YML072C
near-YML080W_55	chrXIII	108736	108804	GTG	55	-69	YML080W
near-YML081C-A_40	chrXIII	104163	104181	TTG	40	-19	YML081C-A
near-YML086C_134	chrXIII	97372	97393	ATA	134	-22	YML086C
near-YML086C_136	chrXIII	97372	97391	ATT	136	-20	YML086C
near-YML086C_70	chrXIII	97440	97457	CTG	70	-86	YML086C
near-YML100W_25	chrXIII	70607	70622	ACG	25	-16	YML100W
near-YML106W_170	chrXIII	56637	56720	ATA	170	-135	YML106W
near-YML106W_100	chrXIII	56567	56599	ATT	100	-205	YML106W
near-YML106W_161	chrXIII	56628	56720	ATT	161	-144	YML106W
near-YML106W_199	chrXIII	56666	56689	ATT	199	-106	YML106W
near-YML106W_206	chrXIII	56673	56720	CTG	206	-99	YML106W
near-YML106W_101	chrXIII	56568	56618	TTG	101	-204	YML106W
near-YML106W_125	chrXIII	56592	56618	TTG	125	-180	YML106W
near-YML106W_163	chrXIII	56630	56662	TTG	163	-142	YML106W
near-YML106W_230	chrXIII	56697	56720	TTG	230	-75	YML106W
near-YML106W_82	chrXIII	56549	56599	TTG	82	-223	YML106W
near-YML108W_42	chrXIII	54774	54791	ACG	42	-18	YML108W
near-YML118W_13	chrXIII	31907	32044	TTG	13	-426	YML118W
near-YML128C_104	chrXIII	16677	16696	CTG	104	-20	YML128C
near-YMR005W_35	chrXIII	276016	276043	ATA	35	-28	YMR005W
near-YMR010W_131	chrXIII	284965	284988	ACG	131	-134	YMR010W
near-YMR010W_118	chrXIII	284952	285065	CTG	118	-147	YMR010W
near-YMR010W_199	chrXIII	285033	285065	CTG	199	-66	YMR010W
near-YMR012W_60	chrXIII	291094	291111	GTG	60	-39	YMR012W
near-YMR012W_31	chrXIII	291065	291094	TTG	31	-68	YMR012W
near-YMR015C_17	chrXIII	302508	302522	TTG	17	-37	YMR015C
near-YMR016C_32	chrXIII	305717	305785	TTG	32	-192	YMR016C
near-YMR027W_18	chrXIII	325816	325830	GTG	18	-60	YMR027W
near-YMR027W_16	chrXIII	325814	325855	TTG	16	-62	YMR027W
near-YMR027W_25	chrXIII	325823	325855	TTG	25	-53	YMR027W
near-YMR031C_54	chrXIII	334744	334768	ATA	54	-25	YMR031C
near-YMR031C_13	chrXIII	334777	334809	CTG	13	-66	YMR031C
near-YMR031C_35	chrXIII	334744	334787	TTG	35	-44	YMR031C
near-YMR031C_48	chrXIII	334744	334774	TTG	48	-31	YMR031C
near-YMR034C_109	chrXIII	340777	340821	CTG	109	-99	YMR034C
near-YMR039C_46	chrXIII	349523	349576	ATT	46	-54	YMR039C
near-YMR039C_69	chrXIII	349523	349553	ATT	69	-31	YMR039C
near-YMR054W_46	chrXIII	383134	383247	ATA	46	-168	YMR054W
near-YMR054W_159	chrXIII	383247	383276	ATT	159	-55	YMR054W
near-YMR054W_124	chrXIII	383212	383247	GTG	124	-90	YMR054W
near-YMR054W_103	chrXIII	383191	383247	TTG	103	-111	YMR054W
near-YMR054W_32	chrXIII	383120	383137	TTG	32	-182	YMR054W
near-YMR054W_73	chrXIII	383161	383247	TTG	73	-141	YMR054W
near-YMR054W_85	chrXIII	383173	383247	TTG	85	-129	YMR054W
near-YMR054W_97	chrXIII	383185	383247	TTG	97	-117	YMR054W
near-YMR070W_163	chrXIII	409106	409152	ATA	163	-47	YMR070W
near-YMR070W_100	chrXIII	409043	409152	TTG	100	-110	YMR070W
near-YMR080C_31	chrXIII	429628	429666	ATA	31	-39	YMR080C
near-YMR083W_5	chrXIII	434738	434779	CTG	5	-49	YMR083W
near-YMR086W_28	chrXIII	439164	439206	ATA	28	-43	YMR086W
near-YMR088C_30	chrXIII	445103	445189	ATT	30	-87	YMR088C
near-YMR088C_51	chrXIII	445103	445168	TTG	51	-66	YMR088C
near-YMR088C_69	chrXIII	445103	445150	TTG	69	-48	YMR088C
near-YMR089C_114	chrXIII	448157	448171	AAG	114	-85	YMR089C
near-YMR089C_83	chrXIII	448104	448202	ACG	83	-116	YMR089C
near-YMR089C_105	chrXIII	448157	448180	ATA	105	-94	YMR089C
near-YMR089C_77	chrXIII	448104	448208	GTG	77	-122	YMR089C
near-YMR089C_125	chrXIII	448104	448160	TTG	125	-74	YMR089C
near-YMR089C_165	chrXIII	448087	448120	TTG	165	-34	YMR089C
near-YMR089C_49	chrXIII	448192	448236	TTG	49	-150	YMR089C
near-YMR092C_51	chrXIII	453480	453510	ACG	51	-31	YMR092C
near-YMR097C_37	chrXIII	460528	460540	ATC	37	-13	YMR097C
near-YMR105C_20	chrXIII	477613	477645	ATC	20	-39	YMR105C
near-YMR108W_120	chrXIII	484012	484050	ATA	120	-71	YMR108W
near-YMR108W_25	chrXIII	483917	484015	ATT	25	-166	YMR108W
near-YMR108W_96	chrXIII	483988	484050	ATT	96	-95	YMR108W
near-YMR108W_86	chrXIII	483978	484082	TTG	86	-105	YMR108W
near-YMR119W_80	chrXIII	505207	505331	ATT	80	-125	YMR119W
near-YMR122W-A_22	chrXIII	511292	511313	ATC	22	-22	YMR122W-A
near-YMR125W_22	chrXIII	517485	517526	ACG	22	-53	YMR125W
near-YMR125W_10	chrXIII	517473	517526	TTG	10	-65	YMR125W
near-YMR125W_28	chrXIII	517491	517526	TTG	28	-47	YMR125W
near-YMR126C_165	chrXIII	521796	521813	ACG	165	-24	YMR126C
near-YMR126C_147	chrXIII	521796	521831	CTG	147	-42	YMR126C
near-YMR126C_105	chrXIII	521796	521873	TTG	105	-84	YMR126C
near-YMR139W_191	chrXIII	546085	546111	ACG	191	-39	YMR139W
near-YMR139W_141	chrXIII	546035	546070	CTG	141	-89	YMR139W
near-YMR139W_156	chrXIII	546050	546070	CTG	156	-74	YMR139W
near-YMR139W_67	chrXIII	545961	546020	TTG	67	-163	YMR139W
near-YMR139W_96	chrXIII	545990	546070	TTG	96	-134	YMR139W
near-YMR144W_66	chrXIII	553311	553360	CTG	66	-50	YMR144W
near-YMR145C_140	chrXIII	556524	556538	ATA	140	-63	YMR145C
near-YMR145C_159	chrXIII	556502	556519	ATA	159	-44	YMR145C
near-YMR145C_162	chrXIII	556502	556516	ATA	162	-41	YMR145C
near-YMR145C_128	chrXIII	556524	556550	ATT	128	-75	YMR145C
near-YMR148W_178	chrXIII	560285	560302	AAG	178	-80	YMR148W
near-YMR148W_87	chrXIII	560194	560364	ATT	87	-171	YMR148W
near-YMR165C_52	chrXIII	592629	592695	ATC	52	-67	YMR165C
near-YMR166C_197	chrXIII	594509	594529	ATT	197	-56	YMR166C
near-YMR171C_104	chrXIII	605580	605612	TTG	104	-92	YMR171C
near-YMR176W_41	chrXIII	611678	611738	TTG	41	-61	YMR176W
near-YMR177W_83	chrXIII	616511	616564	ATT	83	-54	YMR177W
near-YMR177W_42	chrXIII	616470	616490	TTG	42	-95	YMR177W
near-YMR177W_80	chrXIII	616508	616564	TTG	80	-57	YMR177W
near-YMR181C_15	chrXIII	624196	624243	CTG	15	-163	YMR181C
near-YMR181C_25	chrXIII	624108	624233	TTG	25	-153	YMR181C
near-YMR182C_31	chrXIII	625199	625249	TTG	31	-82	YMR182C
near-YMR183C_48	chrXIII	627809	627837	CTG	48	-29	YMR183C
near-YMR189W_80	chrXIII	637473	637498	ACG	80	-26	YMR189W
near-YMR189W_31	chrXIII	637424	637483	TTG	31	-75	YMR189W
near-YMR190C_117	chrXIII	645288	645305	ATT	117	-47	YMR190C
near-YMR190C_118	chrXIII	645259	645304	TTG	118	-46	YMR190C
near-YMR198W_129	chrXIII	659597	659641	TTG	129	-147	YMR198W
near-YMR198W_71	chrXIII	659539	659568	TTG	71	-205	YMR198W
near-YMR200W_76	chrXIII	664706	664750	AAG	76	-45	YMR200W
near-YMR205C_1	chrXIII	674776	674820	ATA	1	-54	YMR205C
near-YMR205C_31	chrXIII	674776	674790	TTG	31	-24	YMR205C
near-YMR207C_58	chrXIII	683565	683945	ATA	58	-381	YMR207C
near-YMR207C_67	chrXIII	683565	683936	ATT	67	-372	YMR207C
near-YMR212C_66	chrXIII	693044	693119	CTG	66	-76	YMR212C
near-YMR215W_34	chrXIII	696751	696792	TTG	34	-44	YMR215W
near-YMR216C_64	chrXIII	701136	701153	CTG	64	-114	YMR216C
near-YMR216C_106	chrXIII	701064	701111	GTG	106	-72	YMR216C
near-YMR216C_104	chrXIII	701096	701113	TTG	104	-74	YMR216C
near-YMR217W_41	chrXIII	701771	701788	ACG	41	-18	YMR217W
near-YMR217W_7	chrXIII	701737	701766	TTG	7	-52	YMR217W
near-YMR223W_113	chrXIII	716609	716632	ATA	113	-105	YMR223W
near-YMR223W_27	chrXIII	716523	716555	CTG	27	-191	YMR223W
near-YMR223W_133	chrXIII	716629	716713	TTG	133	-85	YMR223W
near-YMR224C_37	chrXIII	720654	720666	ATA	37	-13	YMR224C
near-YMR230W_12	chrXIII	732393	732412	ATC	12	-20	YMR230W
near-YMR234W_10	chrXIII	740202	740264	ACG	10	-63	YMR234W
near-YMR234W_13	chrXIII	740205	740264	TTG	13	-60	YMR234W
near-YMR237W_21	chrXIII	743698	743715	TTG	21	-50	YMR237W
near-YMR238W_90	chrXIII	746308	746325	ATA	90	-44	YMR238W
near-YMR238W_28	chrXIII	746246	746293	TTG	28	-106	YMR238W
near-YMR241W_84	chrXIII	751899	751959	ATC	84	-61	YMR241W
near-YMR241W_76	chrXIII	751891	751929	CTG	76	-69	YMR241W
near-YMR241W_21	chrXIII	751836	751877	TTG	21	-124	YMR241W
near-YMR243C_25	chrXIII	756232	756252	ATA	25	-86	YMR243C
near-YMR243C_30	chrXIII	756215	756247	ATT	30	-81	YMR243C
near-YMR244C-A_10	chrXIII	758845	758862	ATA	10	-31	YMR244C-A
near-YMR246W_143	chrXIII	759722	759742	ATA	143	-84	YMR246W
near-YMR246W_79	chrXIII	759658	759672	ATA	79	-148	YMR246W
near-YMR246W_173	chrXIII	759752	759790	ATT	173	-54	YMR246W
near-YMR246W_183	chrXIII	759762	759782	CTG	183	-44	YMR246W
near-YMR246W_106	chrXIII	759685	759708	TTG	106	-121	YMR246W
near-YMR257C_101	chrXIII	782265	782318	TTG	101	-287	YMR257C
near-YMR257C_326	chrXIII	782032	782093	TTG	326	-62	YMR257C
near-YMR261C_17	chrXIII	793388	793438	AGG	17	-69	YMR261C
near-YMR264W_17	chrXIII	795775	795803	ACG	17	-29	YMR264W
near-YMR267W_39	chrXIII	801736	801753	AAG	39	-35	YMR267W
near-YMR273C_174	chrXIII	813981	814005	AAG	174	-25	YMR273C
near-YMR277W_83	chrXIII	820219	820236	TTG	83	-36	YMR277W
near-YMR281W_6	chrXIII	832270	832290	TTG	6	-68	YMR281W
near-YMR290C_3	chrXIII	851592	851615	CTG	3	-24	YMR290C
near-YMR291W_26	chrXIII	852572	852589	ATA	26	-57	YMR291W
near-YMR295C_21	chrXIII	858910	858924	ATC	21	-34	YMR295C
near-YMR296C_23	chrXIII	860938	860970	CTG	23	-79	YMR296C
near-YMR300C_35	chrXIII	867159	867182	ATA	35	-91	YMR300C
near-YMR300C_79	chrXIII	867097	867138	ATA	79	-47	YMR300C
near-YMR300C_55	chrXIII	867097	867162	TTG	55	-71	YMR300C
near-YMR305C_72	chrXIII	880233	880297	ATT	72	-65	YMR305C
near-YMR305C_39	chrXIII	880233	880330	CTG	39	-98	YMR305C
near-YMR305C_51	chrXIII	880233	880318	CTG	51	-86	YMR305C
near-YMR305C_93	chrXIII	880233	880276	TTG	93	-44	YMR305C
near-YMR308C_110	chrXIII	892232	892258	ACG	110	-37	YMR308C
near-YMR308C_84	chrXIII	892258	892284	ATT	84	-63	YMR308C
near-YMR308C_33	chrXIII	892258	892335	GTG	33	-114	YMR308C
near-YMR308C_90	chrXIII	892258	892278	TTG	90	-57	YMR308C
near-YMR309C_27	chrXIII	895427	895455	ATA	27	-29	YMR309C
near-YMR309C_9	chrXIII	895427	895473	ATT	9	-47	YMR309C
near-YNL007C_115	chrXIV	619568	619591	ATA	115	-26	YNL007C
near-YNL007C_56	chrXIV	619624	619650	ATA	56	-85	YNL007C
near-YNL007C_106	chrXIV	619568	619600	ATC	106	-35	YNL007C
near-YNL007C_100	chrXIV	619568	619606	ATT	100	-41	YNL007C
near-YNL007C_26	chrXIV	619624	619680	TTG	26	-115	YNL007C
near-YNL016W_1	chrXIV	602854	602868	ATA	1	-52	YNL016W
near-YNL016W_40	chrXIV	602893	602905	TTG	40	-13	YNL016W
near-YNL020C_17	chrXIV	597594	597650	GTG	17	-111	YNL020C
near-YNL021W_25	chrXIV	593191	593223	AAG	25	-35	YNL021W
near-YNL024C-A_29	chrXIV	586821	586845	TTG	29	-25	YNL024C-A
near-YNL027W_27	chrXIV	579497	579523	ACG	27	-82	YNL027W
near-YNL027W_40	chrXIV	579510	579542	CTG	40	-69	YNL027W
near-YNL032W_28	chrXIV	574393	574413	TTG	28	-112	YNL032W
near-YNL036W_29	chrXIV	559791	559812	ATT	29	-22	YNL036W
near-YNL036W_35	chrXIV	559797	559812	ATT	35	-16	YNL036W
near-YNL037C_40	chrXIV	559003	559067	ATC	40	-65	YNL037C
near-YNL037C_62	chrXIV	559016	559045	ATC	62	-43	YNL037C
near-YNL042W_60	chrXIV	548070	548098	TTG	60	-29	YNL042W
near-YNL044W_39	chrXIV	545235	545249	ATA	39	-32	YNL044W
near-YNL055C_19	chrXIV	518846	518865	ATC	19	-20	YNL055C
near-YNL064C_131	chrXIV	507136	507159	ATA	131	-62	YNL064C
near-YNL064C_43	chrXIV	507152	507247	ATA	43	-150	YNL064C
near-YNL064C_15	chrXIV	507237	507275	ATC	15	-178	YNL064C
near-YNL064C_162	chrXIV	507111	507128	ATC	162	-31	YNL064C
near-YNL064C_134	chrXIV	507136	507156	ATT	134	-59	YNL064C
near-YNL064C_141	chrXIV	507111	507149	ATT	141	-52	YNL064C
near-YNL064C_151	chrXIV	507098	507139	CTG	151	-42	YNL064C
near-YNL064C_80	chrXIV	507166	507210	CTG	80	-113	YNL064C
near-YNL064C_121	chrXIV	507152	507169	TTG	121	-72	YNL064C
near-YNL064C_73	chrXIV	507152	507217	TTG	73	-120	YNL064C
near-YNL065W_41	chrXIV	503671	503688	ATA	41	-52	YNL065W
near-YNL066W_18	chrXIV	500979	501110	ATA	18	-535	YNL066W
near-YNL066W_39	chrXIV	501000	501110	ATA	39	-514	YNL066W
near-YNL066W_21	chrXIV	500982	501110	ATC	21	-532	YNL066W
near-YNL066W_75	chrXIV	501036	501110	ATC	75	-478	YNL066W
near-YNL066W_167	chrXIV	501128	501277	ATT	167	-386	YNL066W
near-YNL066W_46	chrXIV	501007	501021	ATT	46	-507	YNL066W
near-YNL068C_24	chrXIV	498377	498475	TTG	24	-186	YNL068C
near-YNL070W_19	chrXIV	493331	493354	ATA	19	-34	YNL070W
near-YNL070W_21	chrXIV	493333	493347	ATT	21	-32	YNL070W
near-YNL076W_41	chrXIV	483324	483347	ATA	41	-231	YNL076W
near-YNL076W_215	chrXIV	483498	483521	ATT	215	-57	YNL076W
near-YNL077W_84	chrXIV	481326	481340	CTG	84	-64	YNL077W
near-YNL084C_34	chrXIV	471103	471122	ATA	34	-20	YNL084C
near-YNL085W_133	chrXIV	466997	467023	ATT	133	-133	YNL085W
near-YNL085W_174	chrXIV	467038	467085	CTG	174	-92	YNL085W
near-YNL085W_1	chrXIV	466865	466936	TTG	1	-265	YNL085W
near-YNL085W_105	chrXIV	466969	467031	TTG	105	-161	YNL085W
near-YNL085W_86	chrXIV	466950	467009	TTG	86	-180	YNL085W
near-YNL090W_72	chrXIV	456477	456527	CTG	72	-87	YNL090W
near-YNL090W_134	chrXIV	456539	456563	TTG	134	-25	YNL090W
near-YNL091W_91	chrXIV	452351	452380	ATT	91	-56	YNL091W
near-YNL094W_62	chrXIV	447397	447609	ATT	62	-213	YNL094W
near-YNL094W_86	chrXIV	447421	447609	GTG	86	-189	YNL094W
near-YNL097C_59	chrXIV	442375	442407	TTG	59	-49	YNL097C
near-YNL097W-A_55	chrXIV	441195	441272	TTG	55	-235	YNL097W-A
near-YNL101W_49	chrXIV	434860	434874	TTG	49	-138	YNL101W
near-YNL103W_55	chrXIV	427633	427698	CTG	55	-101	YNL103W
near-YNL103W_82	chrXIV	427660	427698	CTG	82	-74	YNL103W
near-YNL104C_52	chrXIV	426755	426812	ATT	52	-58	YNL104C
near-YNL113W_21	chrXIV	412743	412757	TTG	21	-27	YNL113W
near-YNL125C_4	chrXIV	392304	392339	CTG	4	-172	YNL125C
near-YNL134C_7	chrXIV	373582	373619	ATA	7	-38	YNL134C
near-YNL134C_32	chrXIV	373582	373594	CTG	32	-13	YNL134C
near-YNL137C_55	chrXIV	370068	370094	TTG	55	-39	YNL137C
near-YNL145W_25	chrXIV	352397	352412	ATA	25	-16	YNL145W
near-YNL145W_11	chrXIV	352383	352400	ATC	11	-30	YNL145W
near-YNL145W_8	chrXIV	352380	352400	ATC	8	-33	YNL145W
near-YNL151C_16	chrXIV	348522	348555	TTG	16	-34	YNL151C
near-YNL154C_99	chrXIV	345361	345399	ACG	99	-123	YNL154C
near-YNL154C_133	chrXIV	345339	345365	ATT	133	-89	YNL154C
near-YNL154C_120	chrXIV	345361	345378	CTG	120	-102	YNL154C
near-YNL154C_182	chrXIV	345287	345316	CTG	182	-40	YNL154C
near-YNL154C_107	chrXIV	345287	345391	GTG	107	-115	YNL154C
near-YNL154C_156	chrXIV	345313	345342	TTG	156	-66	YNL154C
near-YNL154C_170	chrXIV	345287	345328	TTG	170	-52	YNL154C
near-YNL154C_67	chrXIV	345402	345431	TTG	67	-155	YNL154C
near-YNL156C_43	chrXIV	341969	342096	AAG	43	-128	YNL156C
near-YNL156C_125	chrXIV	341969	342014	ACG	125	-46	YNL156C
near-YNL156C_49	chrXIV	341969	342090	ATA	49	-122	YNL156C
near-YNL156C_145	chrXIV	341969	341994	ATT	145	-26	YNL156C
near-YNL156C_16	chrXIV	341969	342123	ATT	16	-155	YNL156C
near-YNL156C_1	chrXIV	341969	342138	TTG	1	-170	YNL156C
near-YNL161W_65	chrXIV	332521	332577	TTG	65	-75	YNL161W
near-YNL164C_100	chrXIV	326371	326385	ACG	100	-65	YNL164C
near-YNL164C_91	chrXIV	326371	326394	GTG	91	-74	YNL164C
near-YNL164C_67	chrXIV	326371	326418	TTG	67	-98	YNL164C
near-YNL165W_40	chrXIV	323794	323830	ATA	40	-37	YNL165W
near-YNL165W_33	chrXIV	323787	323830	TTG	33	-44	YNL165W
near-YNL168C_21	chrXIV	318810	318822	TTG	21	-13	YNL168C
near-YNL176C_147	chrXIV	306981	307012	AAG	147	-32	YNL176C
near-YNL176C_115	chrXIV	307018	307044	ATC	115	-64	YNL176C
near-YNL183C_96	chrXIV	295594	295617	TTG	96	-108	YNL183C
near-YNL186W_107	chrXIV	289451	289496	ATA	107	-46	YNL186W
near-YNL189W_125	chrXIV	284192	284224	ACG	125	-67	YNL189W
near-YNL189W_13	chrXIV	284080	284169	ATA	13	-179	YNL189W
near-YNL189W_139	chrXIV	284206	284253	TTG	139	-53	YNL189W
near-YNL189W_154	chrXIV	284221	284253	TTG	154	-38	YNL189W
near-YNL189W_70	chrXIV	284137	284169	TTG	70	-122	YNL189W
near-YNL189W_99	chrXIV	284166	284258	TTG	99	-93	YNL189W
near-YNL190W_16	chrXIV	282170	282193	ACG	16	-224	YNL190W
near-YNL190W_188	chrXIV	282342	282386	ATT	188	-52	YNL190W
near-YNL190W_20	chrXIV	282174	282188	GTG	20	-220	YNL190W
near-YNL197C_205	chrXIV	269703	269717	ATC	205	-124	YNL197C
near-YNL197C_144	chrXIV	269722	269778	CTG	144	-185	YNL197C
near-YNL197C_150	chrXIV	269722	269772	CTG	150	-179	YNL197C
near-YNL197C_197	chrXIV	269660	269725	CTG	197	-132	YNL197C
near-YNL197C_126	chrXIV	269722	269796	GTG	126	-203	YNL197C
near-YNL197C_226	chrXIV	269595	269696	TTG	226	-103	YNL197C
near-YNL197C_38	chrXIV	269786	269884	TTG	38	-291	YNL197C
near-YNL200C_26	chrXIV	264477	264527	TTG	26	-74	YNL200C
near-YNL201C_159	chrXIV	263282	263305	ATT	159	-102	YNL201C
near-YNL201C_129	chrXIV	263282	263335	CTG	129	-132	YNL201C
near-YNL201C_99	chrXIV	263282	263365	CTG	99	-162	YNL201C
near-YNL207W_66	chrXIV	255293	255351	TTG	66	-59	YNL207W
near-YNL213C_72	chrXIV	247105	247120	TTG	72	-16	YNL213C
near-YNL216W_90	chrXIV	241665	241687	ATT	90	-23	YNL216W
near-YNL219C_95	chrXIV	237664	237714	CTG	95	-51	YNL219C
near-YNL219C_16	chrXIV	237776	237793	GTG	16	-130	YNL219C
near-YNL220W_25	chrXIV	234346	234411	ATA	25	-66	YNL220W
near-YNL220W_58	chrXIV	234379	234411	ATC	58	-33	YNL220W
near-YNL231C_68	chrXIV	217084	217122	TTG	68	-80	YNL231C
near-YNL233W_85	chrXIV	211830	211889	ATT	85	-91	YNL233W
near-YNL233W_112	chrXIV	211857	211889	GTG	112	-64	YNL233W
near-YNL233W_86	chrXIV	211831	211920	TTG	86	-90	YNL233W
near-YNL238W_133	chrXIV	202278	202298	CTG	133	-149	YNL238W
near-YNL238W_240	chrXIV	202385	202426	TTG	240	-42	YNL238W
near-YNL238W_38	chrXIV	202183	202275	TTG	38	-244	YNL238W
near-YNL243W_27	chrXIV	188024	188049	GTG	27	-26	YNL243W
near-YNL251C_220	chrXIV	174326	174367	ACG	220	-52	YNL251C
near-YNL251C_47	chrXIV	174400	174540	ATC	47	-225	YNL251C
near-YNL251C_74	chrXIV	174400	174513	ATC	74	-198	YNL251C
near-YNL251C_154	chrXIV	174410	174433	ATT	154	-118	YNL251C
near-YNL251C_114	chrXIV	174316	174473	TTG	114	-158	YNL251C
near-YNL251C_14	chrXIV	174400	174573	TTG	14	-258	YNL251C
near-YNL251C_167	chrXIV	174400	174420	TTG	167	-105	YNL251C
near-YNL251C_53	chrXIV	174400	174534	TTG	53	-219	YNL251C
near-YNL256W_19	chrXIV	164589	164621	TTG	19	-33	YNL256W
near-YNL263C_108	chrXIV	147841	147875	ATA	108	-35	YNL263C
near-YNL263C_42	chrXIV	147882	147941	CTG	42	-101	YNL263C
near-YNL263C_70	chrXIV	147896	147913	TTG	70	-73	YNL263C
near-YNL267W_20	chrXIV	140798	140818	CTG	20	-79	YNL267W
near-YNL268W_12	chrXIV	138506	138548	TTG	12	-43	YNL268W
near-YNL272C_4	chrXIV	129153	129176	TTG	4	-92	YNL272C
near-YNL280C_35	chrXIV	110423	110449	ATA	35	-38	YNL280C
near-YNL280C_6	chrXIV	110464	110478	TTG	6	-67	YNL280C
near-YNL283C_84	chrXIV	106909	106977	ATA	84	-282	YNL283C
near-YNL283C_130	chrXIV	106893	106931	TTG	130	-236	YNL283C
near-YNL283C_172	chrXIV	106788	106889	TTG	172	-194	YNL283C
near-YNL283C_326	chrXIV	106696	106735	TTG	326	-40	YNL283C
near-YNL287W_29	chrXIV	91833	91892	ACG	29	-160	YNL287W
near-YNL287W_124	chrXIV	91928	91992	ATA	124	-65	YNL287W
near-YNL287W_48	chrXIV	91852	91878	CTG	48	-141	YNL287W
near-YNL287W_10	chrXIV	91814	91858	TTG	10	-179	YNL287W
near-YNL288W_106	chrXIV	90267	90301	ACG	106	-35	YNL288W
near-YNL288W_81	chrXIV	90242	90259	ATT	81	-60	YNL288W
near-YNL288W_95	chrXIV	90256	90291	CTG	95	-46	YNL288W
near-YNL288W_37	chrXIV	90198	90301	TTG	37	-104	YNL288W
near-YNL288W_73	chrXIV	90234	90301	TTG	73	-68	YNL288W
near-YNL288W_89	chrXIV	90250	90291	TTG	89	-52	YNL288W
near-YNL289W_24	chrXIV	87849	87895	ACG	24	-47	YNL289W
near-YNL289W_8	chrXIV	87833	87880	ATT	8	-63	YNL289W
near-YNL291C_97	chrXIV	85895	85930	CTG	97	-115	YNL291C
near-YNL291C_22	chrXIV	85895	86005	GTG	22	-190	YNL291C
near-YNL291C_25	chrXIV	85895	86002	TTG	25	-187	YNL291C
near-YNL291C_61	chrXIV	85895	85966	TTG	61	-151	YNL291C
near-YNL294C_76	chrXIV	80322	80363	CTG	76	-103	YNL294C
near-YNL300W_73	chrXIV	65724	65742	ATA	73	-19	YNL300W
near-YNL300W_44	chrXIV	65695	65724	ATT	44	-48	YNL300W
near-YNL300W_12	chrXIV	65663	65695	CTG	12	-80	YNL300W
near-YNL307C_68	chrXIV	57579	57668	ATA	68	-95	YNL307C
near-YNL307C_114	chrXIV	57574	57622	ATT	114	-49	YNL307C
near-YNL307C_23	chrXIV	57579	57713	TTG	23	-140	YNL307C
near-YNL307C_65	chrXIV	57579	57671	TTG	65	-98	YNL307C
near-YNR001C_82	chrXIV	631062	631079	ATA	82	-18	YNR001C
near-YNR001C_33	chrXIV	631084	631128	ATT	33	-67	YNR001C
near-YNR001C_39	chrXIV	631084	631122	ATT	39	-61	YNR001C
near-YNR001C_48	chrXIV	631084	631113	ATT	48	-52	YNR001C
near-YNR001C_4	chrXIV	631128	631157	TTG	4	-96	YNR001C
near-YNR001C_9	chrXIV	631132	631152	TTG	9	-91	YNR001C
near-YNR017W_141	chrXIV	662878	662895	ATA	141	-34	YNR017W
near-YNR017W_75	chrXIV	662812	662895	CTG	75	-100	YNR017W
[truncated: 721 more rows]
