# Supplementary material for: Yeast eIF2A has a minimal role in translation initiation and uORF-mediated translational control in vivo
Source: eLife. 2024 Jan 24;12:RP92916. doi: 10.7554/eLife.92916 (PMC10945734; doi:10.7554/eLife.92916)
Supplement: Figure 6—source data 6. [file elife-92916-fig6-data6.xlsx]

## Sheet: Conserved uORFs
uorf_name	Chromosome	Start	End	start_codon	Distance_from_5UTR_start	Distance_to_main_AUG	gene
YBL111C.5333	chrII	5330	5333	ACG	-324	323	YBL111C
YBR078W.393071	chrII	393071	393074	ACG	125	50	YBR078W
YDR071C.589423	chrIV	589420	589423	ACG	42	20	YDR071C
YDR153C.768006	chrIV	768003	768006	ACG	98	34	YDR153C
YDR545W.1526006	chrIV	1526006	1526009	ACG	-314	313	YDR545W
YFL005W.130284	chrVI	130284	130287	ACG	88	48	YFL005W
YFR036W.226492	chrVI	226492	226495	ACG	-369	469	YFR036W
YGR191W.880352	chrVII	880352	880355	ACG	162	66	YGR191W
YGR205W.909116	chrVII	909116	909119	ACG	30	95	YGR205W
YGR209C.913264	chrVII	913261	913264	ACG	16	36	YGR209C
YHR021C.148712	chrVIII	148709	148712	ACG	-8	42	YHR021C
YHR218W.557498	chrVIII	557498	557501	ACG	-515	514	YHR218W
YJL026W.392380	chrX	392380	392383	ACG	20	22	YJL026W
YKL181W.107246	chrXI	107246	107249	ACG	107	68	YKL181W
YLL028W.84702	chrXII	84702	84705	ACG	33	100	YLL028W
YLR229C.604808	chrXII	604805	604808	ACG	188	20	YLR229C
YLR342W.809766	chrXII	809766	809769	ACG	27	229	YLR342W
YLR462W.1065660	chrXII	1065660	1065663	ACG	-295	294	YLR462W
YLR467W.1072193	chrXII	1072193	1072196	ACG	-314	313	YLR467W
YMR308C.892258	chrXIII	892255	892258	ACG	110	36	YMR308C
YNL090W.456529	chrXIV	456529	456532	ACG	124	34	YNL090W
YNL131W.378731	chrXIV	378731	378734	ACG	12	34	YNL131W
YNL156C.342014	chrXIV	342011	342014	ACG	125	45	YNL156C
YNL251C.174367	chrXIV	174364	174367	ACG	220	51	YNL251C
YOL087C.158727	chrXV	158724	158727	ACG	-90	89	YOL087C
YOL109W.110277	chrXV	110277	110280	ACG	37	18	YOL109W
YOR049C.423833	chrXV	423830	423833	ACG	84	100	YOR049C
YOR382W.1059481	chrXV	1059481	1059484	ACG	-32	48	YOR382W
YOR396W.1085158	chrXV	1085158	1085161	ACG	-314	313	YOR396W
YPL145C.279797	chrXVI	279794	279797	ACG	155	97	YPL145C
YBR043C.324011	chrII	324008	324011	AUA	83	65	YBR043C
YBR132C.501580	chrII	501577	501580	AUA	14	137	YBR132C
YDL019C.421626	chrIV	421623	421626	AUA	-112	111	YDL019C
YDL160C.171977	chrIV	171974	171977	AUA	237	46	YDL160C
YDR033W.508080	chrIV	508080	508083	AUA	180	65	YDR033W
YDR077W.600773	chrIV	600773	600776	AUA	12	18	YDR077W
YDR122W.694605	chrIV	694605	694608	AUA	-94	93	YDR122W
YDR303C.1071465	chrIV	1071462	1071465	AUA	213	78	YDR303C
YDR349C.1174701	chrIV	1174698	1174701	AUA	-420	524	YDR349C
YDR380W.1234194	chrIV	1234194	1234197	AUA	82	22	YDR380W
YDR381W.1236540	chrIV	1236540	1236543	AUA	-10	16	YDR381W
YEL009C.140194	chrV	140191	140194	AUA	140	430	YEL009C
YEL034W.85656	chrV	85656	85659	AUA	34	18	YEL034W
YEL037C.82665	chrV	82662	82665	AUA	97	61	YEL037C
YER159C.492014	chrV	492011	492014	AUA	127	55	YER159C
YFL039C.54781	chrVI	54778	54781	AUA	35	84	YFL039C
YFR033C.224816	chrVI	224813	224816	AUA	59	46	YFR033C
YGL044C.417104	chrVII	417101	417104	AUA	159	67	YGL044C
YGL167C.190550	chrVII	190547	190550	AUA	294	81	YGL167C
YGR054W.596638	chrVII	596638	596641	AUA	117	53	YGR054W
YGR189C.878215	chrVII	878212	878215	AUA	39	22	YGR189C
YGR189C.878252	chrVII	878249	878252	AUA	2	59	YGR189C
YGR229C.951118	chrVII	951115	951118	AUA	57	218	YGR229C
YHL011C.81639	chrVIII	81636	81639	AUA	77	22	YHL011C
YHR159W.417518	chrVIII	417518	417521	AUA	45	29	YHR159W
YHR209W.519024	chrVIII	519024	519027	AUA	-379	411	YHR209W
YHR210C.521772	chrVIII	521769	521772	AUA	71	34	YHR210C
YIL028W.301662	chrIX	301662	301665	AUA	97	436	YIL028W
YJL159W.120409	chrX	120409	120412	AUA	15	38	YJL159W
YKL212W.34485	chrXI	34485	34488	AUA	144	56	YKL212W
YLR048W.242207	chrXII	242207	242210	AUA	18	23	YLR048W
YLR286C.710235	chrXII	710232	710235	AUA	132	98	YLR286C
YLR380W.878236	chrXII	878236	878239	AUA	48	44	YLR380W
YML121W.26843	chrXIII	26843	26846	AUA	-23	85	YML121W
YMR043W.353848	chrXIII	353848	353851	AUA	-5	21	YMR043W
YNL251C.174438	chrXIV	174435	174438	AUA	149	122	YNL251C
YOR130C.570841	chrXV	570838	570841	AUA	-29	33	YOR130C
YOR267C.824916	chrXV	824913	824916	AUA	128	48	YOR267C
YPL067C.425892	chrXVI	425889	425892	AUA	12	44	YPL067C
YPR149W.829852	chrXVI	829852	829855	AUA	99	64	YPR149W
YPR149W.829891	chrXVI	829891	829894	AUA	138	25	YPR149W
YBR196C.613920	chrII	613917	613920	AUC	22	19	YBR196C
YDL006W.439868	chrIV	439868	439871	AUC	281	39	YDL006W
YDL130W.229866	chrIV	229866	229869	AUC	-22	38	YDL130W
YDL160C.172214	chrIV	172211	172214	AUC	0	283	YDL160C
YDR033W.508104	chrIV	508104	508107	AUC	204	41	YDR033W
YDR071C.589465	chrIV	589462	589465	AUC	0	62	YDR071C
YER118C.399092	chrV	399089	399092	AUC	155	36	YER118C
YLR248W.634140	chrXII	634140	634143	AUC	-56	110	YLR248W
YLR342W.809968	chrXII	809968	809971	AUC	229	27	YLR342W
YML086C.97388	chrXIII	97385	97388	AUC	139	16	YML086C
YMR108W.484031	chrXIII	484031	484034	AUC	139	51	YMR108W
YNR016C.661649	chrXIV	661646	661649	AUC	-275	274	YNR016C
YNR016C.661737	chrXIV	661734	661737	AUC	-363	362	YNR016C
YAL002W.143604	chrI	143604	143607	AUG	-102	101	YAL002W
YAL014C.129038	chrI	129035	129038	AUG	34	18	YAL014C
YAL063C-A.22913	chrI	22910	22913	AUG	720	227	YAL063C-A
YAL064W-B.11428	chrI	11428	11431	AUG	116	616	YAL064W-B
YAR023C.180094	chrI	180091	180094	AUG	840	273	YAR023C
YBL002W.236358	chrII	236358	236361	AUG	-110	132	YBL002W
YBL009W.207171	chrII	207171	207174	AUG	12	21	YBL009W
YBL029C-A.164849	chrII	164846	164849	AUG	-8	76	YBL029C-A
YBL039W-B.143188	chrII	143188	143191	AUG	1	203	YBL039W-B
YBL060W.107881	chrII	107881	107884	AUG	-32	49	YBL060W
YBL064C.101190	chrII	101187	101190	AUG	-2	33	YBL064C
YBL068W.92348	chrII	92348	92351	AUG	-33	64	YBL068W
YBR008C.254415	chrII	254412	254415	AUG	12	205	YBR008C
YBR008C.254856	chrII	254853	254856	AUG	-429	646	YBR008C
YBR028C.296058	chrII	296055	296058	AUG	25	55	YBR028C
YBR030W.298135	chrII	298135	298138	AUG	-99	155	YBR030W
YBR085W.415886	chrII	415886	415889	AUG	-21	95	YBR085W
YBR086C.423103	chrII	423100	423103	AUG	229	61	YBR086C
YBR093C.431177	chrII	431174	431177	AUG	-191	225	YBR093C
YBR145W.533697	chrII	533697	533700	AUG	-23	63	YBR145W
YBR158W.556332	chrII	556332	556335	AUG	47	215	YBR158W
YBR162W-A.565097	chrII	565097	565100	AUG	-116	132	YBR162W-A
YBR168W.572066	chrII	572066	572069	AUG	-24	303	YBR168W
YBR168W.572266	chrII	572266	572269	AUG	176	103	YBR168W
YBR187W.602519	chrII	602519	602522	AUG	15	113	YBR187W
YBR208C.642431	chrII	642428	642431	AUG	226	220	YBR208C
YBR208C.642520	chrII	642517	642520	AUG	137	309	YBR208C
YBR210W.645419	chrII	645419	645422	AUG	-92	129	YBR210W
YBR213W.650326	chrII	650326	650329	AUG	29	40	YBR213W
YBR242W.704493	chrII	704493	704496	AUG	-36	175	YBR242W
YBR242W.704563	chrII	704563	704566	AUG	34	105	YBR242W
YBR253W.723232	chrII	723232	723235	AUG	24	36	YBR253W
YBR270C.744595	chrII	744592	744595	AUG	75	196	YBR270C
YBR291C.784621	chrII	784618	784621	AUG	-13	48	YBR291C
YBR295W.792800	chrII	792800	792803	AUG	-48	47	YBR295W
YBR300C.809647	chrII	809644	809647	AUG	165	549	YBR300C
YBR300C.809677	chrII	809674	809677	AUG	135	579	YBR300C
YCL016C.95812	chrIII	95809	95812	AUG	-20	48	YCL016C
YCR019W.152772	chrIII	152772	152775	AUG	84	63	YCR019W
YCR023C.160429	chrIII	160426	160429	AUG	21	55	YCR023C
YCR028C.172525	chrIII	172522	172525	AUG	17	100	YCR028C
YCR030C.176856	chrIII	176853	176856	AUG	-333	417	YCR030C
YCR030C.177117	chrIII	177114	177117	AUG	-594	678	YCR030C
YCR036W.193250	chrIII	193250	193253	AUG	-42	45	YCR036W
YCR045W-A.208297	chrIII	208297	208300	AUG	164	452	YCR045W-A
YCR095W-A.289605	chrIII	289605	289608	AUG	130	32	YCR095W-A
YCR096C.293606	chrIII	293603	293606	AUG	-68	67	YCR096C
YDL002C.447620	chrIV	447617	447620	AUG	43	41	YDL002C
YDL009C.434063	chrIV	434060	434063	AUG	-246	814	YDL009C
YDL025W-A.405270	chrIV	405270	405273	AUG	-19	138	YDL025W-A
YDL028C.403308	chrIV	403305	403308	AUG	159	16	YDL028C
YDL053C.362458	chrIV	362455	362458	AUG	-4	201	YDL053C
YDL070W.330769	chrIV	330769	330772	AUG	-231	253	YDL070W
YDL076C.321655	chrIV	321652	321655	AUG	44	102	YDL076C
YDL125C.239692	chrIV	239689	239692	AUG	-86	85	YDL125C
YDL125C.239795	chrIV	239792	239795	AUG	-189	188	YDL125C
YDL133W.222371	chrIV	222371	222374	AUG	80	54	YDL133W
YDL138W.213324	chrIV	213324	213327	AUG	150	25	YDL138W
YDL176W.141993	chrIV	141993	141996	AUG	34	102	YDL176W
YDL177C.141749	chrIV	141746	141749	AUG	36	27	YDL177C
YDL198C.104619	chrIV	104616	104619	AUG	-40	67	YDL198C
YDL206W.90140	chrIV	90140	90143	AUG	114	34	YDL206W
YDR001C.452725	chrIV	452722	452725	AUG	-250	249	YDR001C
YDR005C.458224	chrIV	458221	458224	AUG	-13	120	YDR005C
YDR034C.512657	chrIV	512654	512657	AUG	-409	547	YDR034C
YDR036C.525010	chrIV	525007	525010	AUG	-287	296	YDR036C
YDR038C.530745	chrIV	530742	530745	AUG	-48	47	YDR038C
YDR039C.534630	chrIV	534627	534630	AUG	-48	47	YDR039C
YDR043C.543541	chrIV	543538	543541	AUG	8	171	YDR043C
YDR045C.548370	chrIV	548367	548370	AUG	95	59	YDR045C
YDR046C.550629	chrIV	550626	550629	AUG	37	52	YDR046C
YDR047W.551445	chrIV	551445	551448	AUG	-290	413	YDR047W
YDR047W.551677	chrIV	551677	551680	AUG	-58	181	YDR047W
YDR047W.551715	chrIV	551715	551718	AUG	-20	143	YDR047W
YDR052C.560800	chrIV	560797	560800	AUG	-21	174	YDR052C
YDR063W.578342	chrIV	578342	578345	AUG	-252	319	YDR063W
YDR063W.578447	chrIV	578447	578450	AUG	-147	214	YDR063W
YDR065W.580669	chrIV	580669	580672	AUG	20	16	YDR065W
YDR073W.592204	chrIV	592204	592207	AUG	48	233	YDR073W
YDR073W.592338	chrIV	592338	592341	AUG	182	99	YDR073W
YDR085C.616303	chrIV	616300	616303	AUG	-153	152	YDR085C
YDR103W.657833	chrIV	657833	657836	AUG	-516	515	YDR103W
YDR147W.751310	chrIV	751310	751313	AUG	-258	319	YDR147W
YDR160W.776029	chrIV	776029	776032	AUG	45	132	YDR160W
YDR206W.861806	chrIV	861806	861809	AUG	91	246	YDR206W
YDR228C.924437	chrIV	924434	924437	AUG	-541	630	YDR228C
YDR242W.946736	chrIV	946736	946739	AUG	26	69	YDR242W
YDR265W.998637	chrIV	998637	998640	AUG	4	225	YDR265W
YDR275W.1011638	chrIV	1011638	1011641	AUG	60	612	YDR275W
YDR334W.1135879	chrIV	1135879	1135882	AUG	112	51	YDR334W
YDR357C.1189633	chrIV	1189630	1189633	AUG	13	65	YDR357C
YDR362C.1198795	chrIV	1198792	1198795	AUG	12	97	YDR362C
YDR366C.1212857	chrIV	1212854	1212857	AUG	42	20	YDR366C
YDR379C-A.1233564	chrIV	1233561	1233564	AUG	-25	46	YDR379C-A
YDR379C-A.1233651	chrIV	1233648	1233651	AUG	-112	133	YDR379C-A
YDR384C.1242148	chrIV	1242145	1242148	AUG	-63	116	YDR384C
YDR387C.1249900	chrIV	1249897	1249900	AUG	67	78	YDR387C
YDR408C.1288922	chrIV	1288919	1288922	AUG	-17	62	YDR408C
YDR414C.1296829	chrIV	1296826	1296829	AUG	54	142	YDR414C
YDR441C.1345093	chrIV	1345090	1345093	AUG	104	30	YDR441C
YDR472W.1403212	chrIV	1403212	1403215	AUG	-70	108	YDR472W
YDR483W.1421099	chrIV	1421099	1421102	AUG	-31	56	YDR483W
YDR530C.1497844	chrIV	1497841	1497844	AUG	-72	75	YDR530C
YDR531W.1498214	chrIV	1498214	1498217	AUG	33	16	YDR531W
YEL006W.144294	chrV	144294	144297	AUG	25	31	YEL006W
YEL009C.139914	chrV	139911	139914	AUG	420	150	YEL009C
YEL009C.139939	chrV	139936	139939	AUG	395	175	YEL009C
YEL009C.140056	chrV	140053	140056	AUG	278	292	YEL009C
YEL009C.140124	chrV	140121	140124	AUG	210	360	YEL009C
YEL020C-B.117794	chrV	117791	117794	AUG	324	413	YEL020C-B
YEL028W.98162	chrV	98162	98165	AUG	89	504	YEL028W
YEL030W.94220	chrV	94220	94223	AUG	-423	422	YEL030W
YEL036C.84572	chrV	84569	84572	AUG	125	19	YEL036C
YEL072W.13696	chrV	13696	13699	AUG	107	22	YEL072W
YER041W.232400	chrV	232400	232403	AUG	22	59	YER041W
YER053C.259736	chrV	259733	259736	AUG	1	96	YER053C
YER066W.289487	chrV	289487	289490	AUG	138	753	YER066W
YER081W.322234	chrV	322234	322237	AUG	22	450	YER081W
YER081W.322342	chrV	322342	322345	AUG	130	342	YER081W
YER087C-A.332566	chrV	332563	332566	AUG	10	197	YER087C-A
YER103W.364445	chrV	364445	364448	AUG	61	142	YER103W
YER115C.395074	chrV	395071	395074	AUG	10	206	YER115C
YER129W.417164	chrV	417164	417167	AUG	-116	115	YER129W
YER159C.492120	chrV	492117	492120	AUG	21	161	YER159C
YER186C.562699	chrV	562696	562699	AUG	111	73	YER186C
YFL050C.35946	chrVI	35943	35946	AUG	681	97	YFL050C
YFR017C.182935	chrVI	182932	182935	AUG	4	73	YFR017C
YFR020W.192498	chrVI	192498	192501	AUG	-115	237	YFR020W
YFR027W.207406	chrVI	207406	207409	AUG	-28	44	YFR027W
YGL001C.496599	chrVII	496596	496599	AUG	-43	96	YGL001C
YGL006W.485776	chrVII	485776	485779	AUG	-144	143	YGL006W
YGL028C.443363	chrVII	443360	443363	AUG	-287	453	YGL028C
YGL063W.383588	chrVII	383588	383591	AUG	129	64	YGL063W
YGL071W.371929	chrVII	371929	371932	AUG	376	81	YGL071W
YGL090W.343295	chrVII	343295	343298	AUG	9	22	YGL090W
YGL096W.324626	chrVII	324626	324629	AUG	-704	703	YGL096W
YGL101W.311946	chrVII	311946	311949	AUG	-218	245	YGL101W
YGL134W.255638	chrVII	255638	255641	AUG	73	23	YGL134W
YGL136C.253891	chrVII	253888	253891	AUG	-6	31	YGL136C
YGL136C.254000	chrVII	253997	254000	AUG	-115	140	YGL136C
YGL136C.254130	chrVII	254127	254130	AUG	-245	270	YGL136C
YGL169W.186021	chrVII	186021	186024	AUG	22	36	YGL169W
YGL191W.144736	chrVII	144736	144739	AUG	32	70	YGL191W
YGL197W.124589	chrVII	124589	124592	AUG	-108	107	YGL197W
YGL246C.38847	chrVII	38844	38847	AUG	-38	66	YGL246C
YGL257C.14357	chrVII	14354	14357	AUG	-91	199	YGL257C
YGL258W.10470	chrVII	10470	10473	AUG	28	638	YGL258W
YGR052W.593195	chrVII	593195	593198	AUG	-400	399	YGR052W
YGR052W.593397	chrVII	593397	593400	AUG	-198	197	YGR052W
YGR057C.605526	chrVII	605523	605526	AUG	38	24	YGR057C
YGR065C.619968	chrVII	619965	619968	AUG	16	109	YGR065C
YGR071C.634089	chrVII	634086	634089	AUG	31	25	YGR071C
YGR093W.670337	chrVII	670337	670340	AUG	0	49	YGR093W
YGR095C.676404	chrVII	676401	676404	AUG	8	61	YGR095C
YGR122W.733803	chrVII	733803	733806	AUG	15	130	YGR122W
YGR149W.788761	chrVII	788761	788764	AUG	-158	268	YGR149W
YGR166W.830464	chrVII	830464	830467	AUG	30	49	YGR166W
YGR168C.834507	chrVII	834504	834507	AUG	16	24	YGR168C
YGR215W.921831	chrVII	921831	921834	AUG	-292	342	YGR215W
YGR289C.1076125	chrVII	1076122	1076125	AUG	19	311	YGR289C
YGR293C.1080891	chrVII	1080888	1080891	AUG	63	544	YGR293C
YGR293C.1080922	chrVII	1080919	1080922	AUG	32	575	YGR293C
YHL008C.94556	chrVIII	94553	94556	AUG	122	45	YHL008C
YHL016C.74994	chrVIII	74991	74994	AUG	-750	749	YHL016C
YHL026C.54246	chrVIII	54243	54246	AUG	-5	79	YHL026C
YHR009C.125930	chrVIII	125927	125930	AUG	-15	249	YHR009C
YHR011W.127570	chrVIII	127570	127573	AUG	-201	208	YHR011W
YHR022C.150448	chrVIII	150445	150448	AUG	-42	102	YHR022C
YHR022C.150471	chrVIII	150468	150471	AUG	-65	125	YHR022C
YHR022C.151151	chrVIII	151148	151151	AUG	-745	805	YHR022C
YHR044C.194892	chrVIII	194889	194892	AUG	-34	83	YHR044C
YHR044C.194956	chrVIII	194953	194956	AUG	-98	147	YHR044C
YHR046C.198411	chrVIII	198408	198411	AUG	-95	125	YHR046C
YHR072W.239035	chrVIII	239035	239038	AUG	4	61	YHR072W
YHR078W.256232	chrVIII	256232	256235	AUG	-99	126	YHR078W
YHR079C.261833	chrVIII	261830	261833	AUG	11	241	YHR079C
YHR114W.338030	chrVIII	338030	338033	AUG	20	51	YHR114W
YHR135C.374390	chrVIII	374387	374390	AUG	41	79	YHR135C
YHR157W.412316	chrVIII	412316	412319	AUG	-568	589	YHR157W
YHR204W.506290	chrVIII	506290	506293	AUG	19	27	YHR204W
YIL002C.353457	chrIX	353454	353457	AUG	126	25	YIL002C
YIL007C.343731	chrIX	343728	343731	AUG	-31	74	YIL007C
YIL028W.301739	chrIX	301739	301742	AUG	174	359	YIL028W
YIL029C.301327	chrIX	301324	301327	AUG	35	69	YIL029C
YIL038C.282669	chrIX	282666	282669	AUG	221	16	YIL038C
YIL050W.258632	chrIX	258632	258635	AUG	-166	279	YIL050W
YIL059C.247298	chrIX	247295	247298	AUG	165	382	YIL059C
YIL059C.247377	chrIX	247374	247377	AUG	86	461	YIL059C
YIL077C.216409	chrIX	216406	216409	AUG	-439	455	YIL077C
YIL084C.203330	chrIX	203327	203330	AUG	-29	70	YIL084C
YIL094C.187693	chrIX	187690	187693	AUG	-38	60	YIL094C
YIL119C.137979	chrIX	137976	137979	AUG	99	101	YIL119C
YIL124W.126145	chrIX	126145	126148	AUG	-27	57	YIL124W
YIL134C-A.97116	chrIX	97113	97116	AUG	43	390	YIL134C-A
YIR031C.414776	chrIX	414773	414776	AUG	24	96	YIR031C
YJL025W.393908	chrX	393908	393911	AUG	22	57	YJL025W
YJL063C.317127	chrX	317124	317127	AUG	-629	651	YJL063C
YJL065C.315576	chrX	315573	315576	AUG	15	18	YJL065C
YJL098W.241979	chrX	241979	241982	AUG	88	101	YJL098W
YJL100W.237017	chrX	237017	237020	AUG	-180	244	YJL100W
YJL100W.237207	chrX	237207	237210	AUG	10	54	YJL100W
YJL106W.220692	chrX	220692	220695	AUG	112	696	YJL106W
YJL126W.184467	chrX	184467	184470	AUG	-26	32	YJL126W
YJL133W.160595	chrX	160595	160598	AUG	54	22	YJL133W
YJL139C.153053	chrX	153050	153053	AUG	29	53	YJL139C
YJL140W.150868	chrX	150868	150871	AUG	2	91	YJL140W
YJL141C.150408	chrX	150405	150408	AUG	117	17	YJL141C
YJL156C.128986	chrX	128983	128986	AUG	-34	33	YJL156C
YJL179W.88712	chrX	88712	88715	AUG	-17	73	YJL179W
YJL213W.31832	chrX	31832	31835	AUG	-330	329	YJL213W
YJR004C.445536	chrX	445533	445536	AUG	-675	674	YJR004C
YJR054W.536020	chrX	536020	536023	AUG	32	34	YJR054W
YJR058C.545279	chrX	545276	545279	AUG	-81	103	YJR058C
YJR082C.582374	chrX	582371	582374	AUG	-12	118	YJR082C
YJR102C.620035	chrX	620032	620035	AUG	-261	269	YJR102C
YJR102C.620369	chrX	620366	620369	AUG	-595	603	YJR102C
YJR102C.620537	chrX	620534	620537	AUG	-763	771	YJR102C
YJR134C.675877	chrX	675874	675877	AUG	16	24	YJR134C
YJR154W.725654	chrX	725654	725657	AUG	56	128	YJR154W
YJR154W.725711	chrX	725711	725714	AUG	113	71	YJR154W
YKL001C.439464	chrXI	439461	439464	AUG	-35	78	YKL001C
YKL019W.402521	chrXI	402521	402524	AUG	-27	45	YKL019W
YKL023C-A.393392	chrXI	393389	393392	AUG	17	18	YKL023C-A
YKL026C.389972	chrXI	389969	389972	AUG	-89	88	YKL026C
YKL029C.384875	chrXI	384872	384875	AUG	-113	149	YKL029C
YKL040C.362225	chrXI	362222	362225	AUG	-369	396	YKL040C
YKL041W.360044	chrXI	360044	360047	AUG	-4	97	YKL041W
YKL061W.325530	chrXI	325530	325533	AUG	-223	239	YKL061W
YKL064W.317662	chrXI	317662	317665	AUG	48	100	YKL064W
YKL109W.231977	chrXI	231977	231980	AUG	22	248	YKL109W
YKL109W.232165	chrXI	232165	232168	AUG	210	60	YKL109W
YKL120W.217245	chrXI	217245	217248	AUG	-21	97	YKL120W
YKL161C.150905	chrXI	150902	150905	AUG	-150	217	YKL161C
YKL163W.143644	chrXI	143644	143647	AUG	56	755	YKL163W
YKL163W.143683	chrXI	143683	143686	AUG	95	716	YKL163W
YKL163W.143763	chrXI	143763	143766	AUG	175	636	YKL163W
YKL165C-A.136999	chrXI	136996	136999	AUG	156	975	YKL165C-A
YKL181W.107108	chrXI	107108	107111	AUG	-31	206	YKL181W
YKL182W.100529	chrXI	100529	100532	AUG	-141	140	YKL182W
YKL183W.98563	chrXI	98563	98566	AUG	-14	156	YKL183W
YKL190W.82906	chrXI	82906	82909	AUG	6	39	YKL190W
YKL198C.70323	chrXI	70320	70323	AUG	205	102	YKL198C
YKR003W.445318	chrXI	445318	445321	AUG	27	61	YKR003W
YKR022C.483162	chrXI	483159	483162	AUG	33	22	YKR022C
YKR039W.514152	chrXI	514152	514155	AUG	-846	909	YKR039W
YKR044W.521882	chrXI	521882	521885	AUG	22	131	YKR044W
YKR061W.557565	chrXI	557565	557568	AUG	-29	110	YKR061W
YKR091W.611440	chrXI	611440	611443	AUG	-52	83	YKR091W
YLL027W.87215	chrXII	87215	87218	AUG	19	186	YLL027W
YLL051C.39525	chrXII	39522	39525	AUG	-40	53	YLL051C
YLL052C.36697	chrXII	36694	36697	AUG	-315	335	YLL052C
YLR021W.183588	chrXII	183588	183591	AUG	13	33	YLR021W
YLR046C.238911	chrXII	238908	238911	AUG	-98	97	YLR046C
YLR047C.241636	chrXII	241633	241636	AUG	19	228	YLR047C
YLR073C.281761	chrXII	281758	281761	AUG	-20	139	YLR073C
YLR100W.341760	chrXII	341760	341763	AUG	-22	48	YLR100W
YLR123C.391705	chrXII	391702	391705	AUG	667	297	YLR123C
YLR126C.395578	chrXII	395575	395578	AUG	15	57	YLR126C
YLR152C.444760	chrXII	444757	444760	AUG	97	71	YLR152C
YLR154W-A.451664	chrXII	451664	451667	AUG	122	773	YLR154W-A
YLR154W-C.454653	chrXII	454653	454656	AUG	-42	41	YLR154W-C
YLR155C.470499	chrXII	470496	470499	AUG	-94	93	YLR155C
YLR155C.470539	chrXII	470536	470539	AUG	-134	133	YLR155C
YLR157C.474151	chrXII	474148	474151	AUG	-94	93	YLR157C
YLR157C.474191	chrXII	474188	474191	AUG	-134	133	YLR157C
YLR158C.483731	chrXII	483728	483731	AUG	-94	93	YLR158C
YLR158C.483771	chrXII	483768	483771	AUG	-134	133	YLR158C
YLR160C.487383	chrXII	487380	487383	AUG	-94	93	YLR160C
YLR160C.487423	chrXII	487420	487423	AUG	-134	133	YLR160C
YLR164W.493613	chrXII	493613	493616	AUG	-269	268	YLR164W
YLR188W.528246	chrXII	528246	528249	AUG	20	52	YLR188W
YLR242C.623923	chrXII	623920	623923	AUG	63	39	YLR242C
YLR271W.682427	chrXII	682427	682430	AUG	44	308	YLR271W
YLR287C.712158	chrXII	712155	712158	AUG	-33	99	YLR287C
YLR287C.712479	chrXII	712476	712479	AUG	-354	420	YLR287C
YLR295C.722469	chrXII	722466	722469	AUG	171	95	YLR295C
YLR299W.725694	chrXII	725694	725697	AUG	-181	373	YLR299W
YLR313C.762367	chrXII	762364	762367	AUG	20	24	YLR313C
YLR328W.784823	chrXII	784823	784826	AUG	122	88	YLR328W
YLR330W.787622	chrXII	787622	787625	AUG	-29	40	YLR330W
YLR346C.822708	chrXII	822705	822708	AUG	-55	115	YLR346C
YLR406C-A.932724	chrXII	932721	932724	AUG	86	368	YLR406C-A
YLR413W.951106	chrXII	951106	951109	AUG	1	48	YLR413W
YLR431C.1001817	chrXII	1001814	1001817	AUG	43	113	YLR431C
YLR453C.1043495	chrXII	1043492	1043495	AUG	-430	508	YLR453C
YML003W.262848	chrXIII	262848	262851	AUG	156	633	YML003W
YML003W.263461	chrXIII	263461	263464	AUG	769	20	YML003W
YML006C.258902	chrXIII	258899	258902	AUG	-332	485	YML006C
YML007W.253762	chrXIII	253762	253765	AUG	77	84	YML007W
YML016C.241728	chrXIII	241725	241728	AUG	127	191	YML016C
YML023C.228690	chrXIII	228687	228690	AUG	18	25	YML023C
YML055W.164653	chrXIII	164653	164656	AUG	-100	135	YML055W
YML055W.164710	chrXIII	164710	164713	AUG	-43	78	YML055W
YML056C.164275	chrXIII	164272	164275	AUG	-45	98	YML056C
YML064C.145968	chrXIII	145965	145968	AUG	-6	91	YML064C
YML068W.137489	chrXIII	137489	137492	AUG	16	59	YML068W
YML068W.137529	chrXIII	137529	137532	AUG	56	19	YML068W
YML106W.56727	chrXIII	56727	56730	AUG	260	44	YML106W
YML108W.54713	chrXIII	54713	54716	AUG	-19	78	YML108W
YML128C.16759	chrXIII	16756	16759	AUG	41	82	YML128C
YML133C.4957	chrXIII	4954	4957	AUG	-273	272	YML133C
YMR009W.283755	chrXIII	283755	283758	AUG	-293	345	YMR009W
YMR010W.284871	chrXIII	284871	284874	AUG	37	227	YMR010W
YMR034C.340828	chrXIII	340825	340828	AUG	102	105	YMR034C
YMR040W.350201	chrXIII	350201	350204	AUG	127	178	YMR040W
YMR046W-A.362207	chrXIII	362207	362210	AUG	49	494	YMR046W-A
YMR090W.448512	chrXIII	448512	448515	AUG	-686	731	YMR090W
YMR123W.512981	chrXIII	512981	512984	AUG	-583	610	YMR123W
YMR126C.521988	chrXIII	521985	521988	AUG	-10	198	YMR126C
YMR135C.540090	chrXIII	540087	540090	AUG	19	33	YMR135C
YMR145C.556639	chrXIII	556636	556639	AUG	39	163	YMR145C
YMR171C.605683	chrXIII	605680	605683	AUG	33	162	YMR171C
YMR176W.611704	chrXIII	611704	611707	AUG	67	34	YMR176W
YMR180C.623240	chrXIII	623237	623240	AUG	-11	26	YMR180C
YMR192W.647075	chrXIII	647075	647078	AUG	47	41	YMR192W
YMR195W.653982	chrXIII	653982	653985	AUG	41	50	YMR195W
YMR222C.716351	chrXIII	716348	716351	AUG	-14	41	YMR222C
YMR229C.731964	chrXIII	731961	731964	AUG	-841	840	YMR229C
YMR234W.740184	chrXIII	740184	740187	AUG	-8	80	YMR234W
YMR239C.749729	chrXIII	749726	749729	AUG	-2	51	YMR239C
YMR255W.777874	chrXIII	777874	777877	AUG	-126	125	YMR255W
YMR258C.784308	chrXIII	784305	784308	AUG	12	26	YMR258C
YMR269W.804418	chrXIII	804418	804421	AUG	-7	36	YMR269W
YMR271C.808046	chrXIII	808043	808046	AUG	-498	497	YMR271C
YMR315W-A.904187	chrXIII	904187	904190	AUG	46	97	YMR315W-A
YMR319C.914664	chrXIII	914661	914664	AUG	-47	125	YMR319C
YMR319C.914713	chrXIII	914710	914713	AUG	-96	174	YMR319C
YMR320W.915850	chrXIII	915850	915853	AUG	390	894	YMR320W
YNL003C.625860	chrXIV	625857	625860	AUG	1	30	YNL003C
YNL036W.559696	chrXIV	559696	559699	AUG	-66	116	YNL036W
YNL042W.548061	chrXIV	548061	548064	AUG	51	37	YNL042W
YNL043C.546016	chrXIV	546013	546016	AUG	19	106	YNL043C
YNL053W.529838	chrXIV	529838	529841	AUG	17	102	YNL053W
YNL063W.507720	chrXIV	507720	507723	AUG	-37	36	YNL063W
YNL076W.483398	chrXIV	483398	483401	AUG	115	156	YNL076W
YNL094W.447456	chrXIV	447456	447459	AUG	121	153	YNL094W
YNL097W-A.441305	chrXIV	441305	441308	AUG	165	124	YNL097W-A
YNL115C.412263	chrXIV	412260	412263	AUG	-189	209	YNL115C
YNL125C.392303	chrXIV	392300	392303	AUG	40	135	YNL125C
YNL142W.357226	chrXIV	357226	357229	AUG	54	225	YNL142W
YNL147W.350854	chrXIV	350854	350857	AUG	-4	84	YNL147W
YNL156C.342176	chrXIV	342173	342176	AUG	-37	207	YNL156C
YNL164C.326339	chrXIV	326336	326339	AUG	146	18	YNL164C
YNL186W.289370	chrXIV	289370	289373	AUG	26	126	YNL186W
YNL191W.280398	chrXIV	280398	280401	AUG	29	32	YNL191W
YNL211C.250338	chrXIV	250335	250338	AUG	28	22	YNL211C
YNL217W.240296	chrXIV	240296	240299	AUG	-7	33	YNL217W
YNL249C.181092	chrXIV	181089	181092	AUG	-48	69	YNL249C
YNR044W.703593	chrXIV	703593	703596	AUG	12	104	YNR044W
YNR055C.730401	chrXIV	730398	730401	AUG	242	214	YNR055C
YNR055C.730845	chrXIV	730842	730845	AUG	-202	658	YNR055C
YNR074C.779100	chrXIV	779097	779100	AUG	-224	361	YNR074C
YOL001W.324475	chrXV	324475	324478	AUG	-384	772	YOL001W
YOL001W.324658	chrXV	324658	324661	AUG	-201	589	YOL001W
YOL002C.324387	chrXV	324384	324387	AUG	-16	22	YOL002C
YOL011W.304645	chrXV	304645	304648	AUG	53	702	YOL011W
YOL012C.304268	chrXV	304265	304268	AUG	-178	284	YOL012C
YOL014W.299637	chrXV	299637	299640	AUG	133	54	YOL014W
YOL018C.292117	chrXV	292114	292117	AUG	22	42	YOL018C
YOL038C-A.255047	chrXV	255044	255047	AUG	38	25	YOL038C-A
YOL038W.255010	chrXV	255010	255013	AUG	-292	325	YOL038W
YOL082W.168429	chrXV	168429	168432	AUG	-27	296	YOL082W
YOL082W.168626	chrXV	168626	168629	AUG	170	99	YOL082W
YOL100W.129156	chrXV	129156	129159	AUG	-80	79	YOL100W
YOL105C.115858	chrXV	115855	115858	AUG	221	49	YOL105C
YOL112W.106577	chrXV	106577	106580	AUG	44	131	YOL112W
YOL117W.96788	chrXV	96788	96791	AUG	-725	761	YOL117W
YOL125W.83758	chrXV	83758	83761	AUG	-14	74	YOL125W
YOL125W.83787	chrXV	83787	83790	AUG	15	45	YOL125W
YOL130W.74118	chrXV	74118	74121	AUG	-29	280	YOL130W
YOL130W.74297	chrXV	74297	74300	AUG	150	101	YOL130W
YOL137W.65546	chrXV	65546	65549	AUG	-18	73	YOL137W
YOL159C.17861	chrXV	17858	17861	AUG	-47	64	YOL159C
YOL159C.17958	chrXV	17955	17958	AUG	-144	161	YOL159C
YOL159C.18007	chrXV	18004	18007	AUG	-193	210	YOL159C
YOR011W.348794	chrXV	348794	348797	AUG	-884	883	YOR011W
YOR030W.386730	chrXV	386730	386733	AUG	2	93	YOR030W
YOR033C.394611	chrXV	394608	394611	AUG	56	86	YOR033C
YOR053W.427628	chrXV	427628	427631	AUG	-6	187	YOR053W
YOR053W.427681	chrXV	427681	427684	AUG	47	134	YOR053W
YOR057W.432129	chrXV	432129	432132	AUG	11	55	YOR057W
YOR061W.441431	chrXV	441431	441434	AUG	22	101	YOR061W
YOR062C.444125	chrXV	444122	444125	AUG	-594	593	YOR062C
YOR083W.479472	chrXV	479472	479475	AUG	-60	59	YOR083W
YOR108W.522923	chrXV	522923	522926	AUG	-73	102	YOR108W
YOR118W.546671	chrXV	546671	546674	AUG	19	184	YOR118W
YOR136W.580152	chrXV	580152	580155	AUG	11	96	YOR136W
YOR149C.611693	chrXV	611690	611693	AUG	-244	304	YOR149C
YOR152C.618781	chrXV	618778	618781	AUG	97	492	YOR152C
YOR162C.642138	chrXV	642135	642138	AUG	42	145	YOR162C
YOR162C.642395	chrXV	642392	642395	AUG	-215	402	YOR162C
YOR180C.675655	chrXV	675652	675655	AUG	13	487	YOR180C
YOR185C.682183	chrXV	682180	682183	AUG	-19	76	YOR185C
YOR219C.755067	chrXV	755064	755067	AUG	-58	57	YOR219C
YOR222W.757881	chrXV	757881	757884	AUG	-420	447	YOR222W
YOR231W.772529	chrXV	772529	772532	AUG	78	70	YOR231W
YOR272W.832743	chrXV	832743	832746	AUG	-22	68	YOR272W
YOR303W.882764	chrXV	882764	882767	AUG	-134	133	YOR303W
YOR306C.891591	chrXV	891588	891591	AUG	-60	158	YOR306C
YOR307C.894192	chrXV	894189	894192	AUG	72	99	YOR307C
YOR342C.967716	chrXV	967713	967716	AUG	22	90	YOR342C
YOR376W-A.1044745	chrXV	1044745	1044748	AUG	40	449	YOR376W-A
YPL008W.539239	chrXVI	539239	539242	AUG	83	144	YPL008W
YPL034W.486410	chrXVI	486410	486413	AUG	33	300	YPL034W
YPL034W.486502	chrXVI	486502	486505	AUG	125	208	YPL034W
YPL036W.482505	chrXVI	482505	482508	AUG	-337	336	YPL036W
YPL045W.467157	chrXVI	467157	467160	AUG	15	101	YPL045W
YPL057C.453201	chrXVI	453198	453201	AUG	40	143	YPL057C
YPL068C.425161	chrXVI	425158	425161	AUG	-47	64	YPL068C
YPL076W.410390	chrXVI	410390	410393	AUG	94	51	YPL076W
YPL088W.381711	chrXVI	381711	381714	AUG	-214	252	YPL088W
YPL115C.335749	chrXVI	335746	335749	AUG	-263	262	YPL115C
YPL140C.289170	chrXVI	289167	289170	AUG	83	135	YPL140C
YPL146C.277548	chrXVI	277545	277548	AUG	17	18	YPL146C
YPL148C.272859	chrXVI	272856	272859	AUG	93	43	YPL148C
YPL160W.246895	chrXVI	246895	246898	AUG	-31	93	YPL160W
YPL164C.241528	chrXVI	241525	241528	AUG	20	30	YPL164C
YPL214C.150247	chrXVI	150244	150247	AUG	51	55	YPL214C
YPL227C.121257	chrXVI	121254	121257	AUG	43	89	YPL227C
YPL227C.121392	chrXVI	121389	121392	AUG	-92	224	YPL227C
YPL234C.105891	chrXVI	105888	105891	AUG	-396	450	YPL234C
YPL236C.102857	chrXVI	102854	102857	AUG	-84	154	YPL236C
YPR013C.585704	chrXVI	585701	585704	AUG	459	118	YPR013C
YPR018W.594426	chrXVI	594426	594429	AUG	41	48	YPR018W
YPR021C.603398	chrXVI	603395	603398	AUG	-41	40	YPR021C
YPR021C.603547	chrXVI	603544	603547	AUG	-190	189	YPR021C
YPR028W.623100	chrXVI	623100	623103	AUG	-371	425	YPR028W
YPR067W.682195	chrXVI	682195	682198	AUG	4	23	YPR067W
YPR070W.685799	chrXVI	685799	685802	AUG	-57	97	YPR070W
YPR072W.690083	chrXVI	690083	690086	AUG	78	22	YPR072W
YPR085C.709872	chrXVI	709869	709872	AUG	43	43	YPR085C
YPR109W.744662	chrXVI	744662	744665	AUG	184	25	YPR109W
YPR127W.790015	chrXVI	790015	790018	AUG	122	66	YPR127W
YPR144C.821460	chrXVI	821457	821460	AUG	-14	36	YPR144C
YPR157W.840959	chrXVI	840959	840962	AUG	-255	305	YPR157W
YPR167C.877689	chrXVI	877686	877689	AUG	-57	56	YPR167C
YPR194C.927133	chrXVI	927130	927133	AUG	-196	195	YPR194C
YPR194C.927244	chrXVI	927241	927244	AUG	-307	306	YPR194C
YAL017W.120194	chrI	120194	120197	AUU	337	29	YAL017W
YBL004W.227591	chrII	227591	227594	AUU	-44	43	YBL004W
YBL052C.122078	chrII	122075	122078	AUU	24	203	YBL052C
YBR121C.483437	chrII	483434	483437	AUU	7	69	YBR121C
YBR154C.549047	chrII	549044	549047	AUU	53	37	YBR154C
YBR182C.594890	chrII	594887	594890	AUU	-26	25	YBR182C
YBR212W.647726	chrII	647726	647729	AUU	247	158	YBR212W
YBR212W.647860	chrII	647860	647863	AUU	381	24	YBR212W
YCR004C.120335	chrIII	120332	120335	AUU	165	16	YCR004C
YCR084C.262516	chrIII	262513	262516	AUU	161	63	YCR084C
YCR084C.262572	chrIII	262569	262572	AUU	105	119	YCR084C
YCR102C.305596	chrIII	305593	305596	AUU	-59	128	YCR102C
YDL134C.221683	chrIV	221680	221683	AUU	-441	911	YDL134C
YDL141W.203018	chrIV	203018	203021	AUU	219	19	YDL141W
YDL160C.172029	chrIV	172026	172029	AUU	185	98	YDL160C
YDR027C.497375	chrIV	497372	497375	AUU	66	56	YDR027C
YDR043C.543418	chrIV	543415	543418	AUU	131	48	YDR043C
YDR377W.1228549	chrIV	1228549	1228552	AUU	6	60	YDR377W
YDR389W.1252404	chrIV	1252404	1252407	AUU	-132	131	YDR389W
YDR414C.1296783	chrIV	1296780	1296783	AUU	100	96	YDR414C
YDR468C.1398730	chrIV	1398727	1398730	AUU	64	29	YDR468C
YDR477W.1412254	chrIV	1412254	1412257	AUU	176	117	YDR477W
YEL009C.140279	chrV	140276	140279	AUU	55	515	YEL009C
YEL020C-B.117686	chrV	117683	117686	AUU	432	305	YEL020C-B
YER057C.271161	chrV	271158	271161	AUU	8	34	YER057C
YER089C.337382	chrV	337379	337382	AUU	270	41	YER089C
YER094C.349376	chrV	349373	349376	AUU	60	29	YER094C
YER107C.374593	chrV	374590	374593	AUU	145	47	YER107C
YER123W.404718	chrV	404718	404721	AUU	94	93	YER123W
YFR049W.248431	chrVI	248431	248434	AUU	71	90	YFR049W
YFR053C.255071	chrVI	255068	255071	AUU	74	21	YFR053C
YHL034C.34191	chrVIII	34188	34191	AUU	5	113	YHL034C
YIL122W.130562	chrIX	130562	130565	AUU	-47	46	YIL122W
YKL054C.338808	chrXI	338805	338808	AUU	55	54	YKL054C
YKL063C.321631	chrXI	321628	321631	AUU	53	112	YKL063C
YKL126W.205605	chrXI	205605	205608	AUU	107	100	YKL126W
YKL182W.100479	chrXI	100479	100482	AUU	-191	190	YKL182W
YLR034C.211968	chrXII	211965	211968	AUU	130	34	YLR034C
YLR113W.371547	chrXII	371547	371550	AUU	102	71	YLR113W
YLR342W.809945	chrXII	809945	809948	AUU	206	50	YLR342W
YLR360W.846073	chrXII	846073	846076	AUU	45	28	YLR360W
YLR368W.857512	chrXII	857512	857515	AUU	27	26	YLR368W
YLR425W.982873	chrXII	982873	982876	AUU	-20	19	YLR425W
YLR460C.1060992	chrXII	1060989	1060992	AUU	-59	104	YLR460C
YML038C.204197	chrXIII	204194	204197	AUU	60	93	YML038C
YMR267W.801742	chrXIII	801742	801745	AUU	45	28	YMR267W
YNL064C.507149	chrXIV	507146	507149	AUU	141	51	YNL064C
YNL076W.483521	chrXIV	483521	483524	AUU	238	33	YNL076W
YNL190W.282294	chrXIV	282294	282297	AUU	140	99	YNL190W
YNL251C.174535	chrXIV	174532	174535	AUU	52	219	YNL251C
YOR049C.423749	chrXV	423746	423749	AUU	168	16	YOR049C
YOR230W.770708	chrXV	770708	770711	AUU	-40	90	YOR230W
YOR232W.774542	chrXV	774542	774545	AUU	87	29	YOR232W
YOR326W.925676	chrXV	925676	925679	AUU	-44	43	YOR326W
YOR370C.1031191	chrXV	1031188	1031191	AUU	143	196	YOR370C
YPL004C.551701	chrXVI	551698	551701	AUU	-19	43	YPL004C
YPR035W.642175	chrXVI	642175	642178	AUU	85	31	YPR035W
YBL045C.135552	chrII	135549	135552	CUG	150	35	YBL045C
YDR074W.593866	chrIV	593866	593869	CUG	195	25	YDR074W
YDR284C.1031597	chrIV	1031594	1031597	CUG	103	177	YDR284C
YDR382W.1239443	chrIV	1239443	1239446	CUG	33	47	YDR382W
YEL022W.111365	chrV	111365	111368	CUG	-55	54	YEL022W
YER090W.337918	chrV	337918	337921	CUG	37	29	YER090W
YER110C.382143	chrV	382140	382143	CUG	72	39	YER110C
YER148W.465139	chrV	465139	465142	CUG	30	162	YER148W
YER148W.465207	chrV	465207	465210	CUG	98	94	YER148W
YGL190C.147431	chrVII	147428	147431	CUG	503	41	YGL190C
YGL256W.14676	chrVII	14676	14679	CUG	16	481	YGL256W
YHL027W.51071	chrVIII	51071	51074	CUG	59	38	YHL027W
YHR009C.125892	chrVIII	125889	125892	CUG	23	211	YHR009C
YHR053C.212752	chrVIII	212749	212752	CUG	-32	31	YHR053C
YHR055C.214750	chrVIII	214747	214750	CUG	-32	31	YHR055C
YHR214W-A.542527	chrVIII	542527	542530	CUG	15	479	YHR214W-A
YIL039W.278385	chrIX	278385	278388	CUG	-11	39	YIL039W
YJR139C.690572	chrX	690569	690572	CUG	16	47	YJR139C
YKL095W.262257	chrXI	262257	262260	CUG	152	18	YKL095W
YKL104C.245455	chrXI	245452	245455	CUG	120	81	YKL104C
YKL164C.142873	chrXI	142870	142873	CUG	21	53	YKL164C
YKL181W.107269	chrXI	107269	107272	CUG	130	45	YKL181W
YLR340W.805848	chrXII	805848	805851	CUG	22	37	YLR340W
YLR347C.826451	chrXII	826448	826451	CUG	82	37	YLR347C
YML016C.241562	chrXIII	241559	241562	CUG	293	25	YML016C
YML058W.159362	chrXIII	159362	159365	CUG	2	19	YML058W
YMR010W.284952	chrXIII	284952	284955	CUG	118	146	YMR010W
YMR200W.664699	chrXIII	664699	664702	CUG	69	51	YMR200W
YMR307W.886962	chrXIII	886962	886965	CUG	-5	39	YMR307W
YNL037C.559076	chrXIV	559073	559076	CUG	31	73	YNL037C
YNL161W.332563	chrXIV	332563	332566	CUG	107	32	YNL161W
YNL189W.284146	chrXIV	284146	284149	CUG	79	112	YNL189W
YOL123W.87812	chrXV	87812	87815	CUG	349	30	YOL123W
YOR118W.546804	chrXV	546804	546807	CUG	152	51	YOR118W
YPL125W.313348	chrXVI	313348	313351	CUG	120	38	YPL125W
YPL154C.261042	chrXVI	261039	261042	CUG	152	110	YPL154C
YPR036W-A.645906	chrXVI	645906	645909	CUG	32	42	YPR036W-A
YPR108W.742402	chrXVI	742402	742405	CUG	29	50	YPR108W
YPR165W.875304	chrXVI	875304	875307	CUG	134	62	YPR165W
YAL053W.45830	chrI	45830	45833	GUG	72	67	YAL053W
YBL017C.191606	chrII	191603	191606	GUG	-23	22	YBL017C
YBR199W.618889	chrII	618889	618892	GUG	80	18	YBR199W
YBR221C.666321	chrII	666318	666321	GUG	135	67	YBR221C
YCR068W.237154	chrIII	237154	237157	GUG	95	58	YCR068W
YDL047W.369719	chrIV	369719	369722	GUG	147	50	YDL047W
YDL136W.217564	chrIV	217564	217567	GUG	-2	34	YDL136W
YDR225W.915479	chrIV	915479	915482	GUG	25	49	YDR225W
YDR492W.1434823	chrIV	1434823	1434826	GUG	54	99	YDR492W
YEL013W.128787	chrV	128787	128790	GUG	212	36	YEL013W
YEL020C-B.117726	chrV	117723	117726	GUG	392	345	YEL020C-B
YEL020C-B.117952	chrV	117949	117952	GUG	166	571	YEL020C-B
YER078C.318361	chrV	318358	318361	GUG	189	18	YER078C
YER125W.410027	chrV	410027	410030	GUG	-161	160	YER125W
YFR036W.226467	chrVI	226467	226470	GUG	-394	494	YFR036W
YGL006W.485876	chrVII	485876	485879	GUG	-44	43	YGL006W
YGL123W.277565	chrVII	277565	277568	GUG	47	50	YGL123W
YGL190C.147485	chrVII	147482	147485	GUG	449	95	YGL190C
YGR195W.888854	chrVII	888854	888857	GUG	93	26	YGR195W
YGR250C.993553	chrVII	993550	993553	GUG	219	31	YGR250C
YGR260W.1012379	chrVII	1012379	1012382	GUG	-105	104	YGR260W
YGR267C.1025793	chrVII	1025790	1025793	GUG	117	57	YGR267C
YHR032W.173308	chrVIII	173308	173311	GUG	61	34	YHR032W
YHR082C.272329	chrVIII	272326	272329	GUG	-781	780	YHR082C
YHR195W.490693	chrVIII	490693	490696	GUG	121	52	YHR195W
YIL048W.261410	chrIX	261410	261413	GUG	279	25	YIL048W
YJL085W.272789	chrX	272789	272792	GUG	52	36	YJL085W
YJL101C.236396	chrX	236393	236396	GUG	103	39	YJL101C
YJL106W.221336	chrX	221336	221339	GUG	756	52	YJL106W
YJR121W.647501	chrX	647501	647504	GUG	-95	104	YJR121W
YKL032C.381896	chrXI	381893	381896	GUG	-38	37	YKL032C
YKL053C-A.339484	chrXI	339481	339484	GUG	44	41	YKL053C-A
YKL063C.321540	chrXI	321537	321540	GUG	144	21	YKL063C
YKL183W.98665	chrXI	98665	98668	GUG	88	54	YKL183W
YKR042W.519399	chrXI	519399	519402	GUG	80	126	YKR042W
YLR009W.166477	chrXII	166477	166480	GUG	81	58	YLR009W
YLR120C.388259	chrXII	388256	388259	GUG	74	38	YLR120C
YLR150W.440422	chrXII	440422	440425	GUG	-18	43	YLR150W
YML116W.38142	chrXIII	38142	38145	GUG	28	52	YML116W
YMR006C.279757	chrXIII	279754	279757	GUG	-18	75	YMR006C
YMR100W.466168	chrXIII	466168	466171	GUG	-131	130	YMR100W
YNL063W.507660	chrXIV	507660	507663	GUG	-97	96	YNL063W
YOL123W.87570	chrXV	87570	87573	GUG	107	272	YOL123W
YOR221C.757583	chrXV	757580	757583	GUG	27	24	YOR221C
YOR233W.775730	chrXV	775730	775733	GUG	-115	114	YOR233W
YPL089C.381202	chrXVI	381199	381202	GUG	201	51	YPL089C
YPL110C.344791	chrXVI	344788	344791	GUG	-52	51	YPL110C
YPL154C.260981	chrXVI	260978	260981	GUG	213	49	YPL154C
YPL158C.254358	chrXVI	254355	254358	GUG	22	47	YPL158C
YPL159C.251730	chrXVI	251727	251730	GUG	31	61	YPL159C
YPL177C.214033	chrXVI	214030	214033	GUG	11	70	YPL177C
YPL202C.169421	chrXVI	169418	169421	GUG	-2	82	YPL202C
YPL243W.88459	chrXVI	88459	88462	GUG	33	56	YPL243W
YPL265W.41007	chrXVI	41007	41010	GUG	88	34	YPL265W
YPR124W.786044	chrXVI	786044	786047	GUG	14	162	YPR124W
YPR124W.786184	chrXVI	786184	786187	GUG	154	22	YPR124W
YPR159W.857444	chrXVI	857444	857447	GUG	50	137	YPR159W
YAL029C.92346	chrI	92343	92346	UUG	126	75	YAL029C
YAR015W.169336	chrI	169336	169339	UUG	51	37	YAR015W
YAR068W.221850	chrI	221850	221853	UUG	-555	554	YAR068W
YBL002W.236450	chrII	236450	236453	UUG	-18	40	YBL002W
YBL030C.164117	chrII	164114	164117	UUG	1	119	YBL030C
YBL047C.132133	chrII	132130	132133	UUG	68	92	YBL047C
YBL052C.121961	chrII	121958	121961	UUG	141	86	YBL052C
YBL081W.71753	chrII	71753	71756	UUG	202	111	YBL081W
YBL085W.63803	chrII	63803	63806	UUG	-72	71	YBL085W
YBL099W.36818	chrII	36818	36821	UUG	86	233	YBL099W
YBL099W.36980	chrII	36980	36983	UUG	248	71	YBL099W
YBR121C.483396	chrII	483393	483396	UUG	48	28	YBR121C
YBR140C.526870	chrII	526867	526870	UUG	-242	241	YBR140C
YBR154C.549082	chrII	549079	549082	UUG	18	72	YBR154C
YBR160W.560002	chrII	560002	560005	UUG	3	74	YBR160W
YBR162C.564781	chrII	564778	564781	UUG	-75	210	YBR162C
YBR221C.666273	chrII	666270	666273	UUG	183	19	YBR221C
YBR283C.770479	chrII	770476	770479	UUG	80	63	YBR283C
YCR005C.122357	chrIII	122354	122357	UUG	31	28	YCR005C
YCR008W.128265	chrIII	128265	128268	UUG	278	203	YCR008W
YCR011C.136911	chrIII	136908	136911	UUG	94	37	YCR011C
YCR021C.157152	chrIII	157149	157152	UUG	55	44	YCR021C
YCR024C-A.163131	chrIII	163128	163131	UUG	85	63	YCR024C-A
YCR024C-A.163208	chrIII	163205	163208	UUG	8	140	YCR024C-A
YCR027C.168099	chrIII	168096	168099	UUG	75	99	YCR027C
YCR030C.176457	chrIII	176454	176457	UUG	66	18	YCR030C
YCR045W-A.208217	chrIII	208217	208220	UUG	84	532	YCR045W-A
YCR069W.239004	chrIII	239004	239007	UUG	97	49	YCR069W
YDL014W.427314	chrIV	427314	427317	UUG	94	48	YDL014W
YDL019C.421707	chrIV	421704	421707	UUG	-193	192	YDL019C
YDL020C.416748	chrIV	416745	416748	UUG	191	39	YDL020C
YDL020C.416823	chrIV	416820	416823	UUG	116	114	YDL020C
YDL028C.403370	chrIV	403367	403370	UUG	97	78	YDL028C
YDL081C.310172	chrIV	310169	310172	UUG	16	49	YDL081C
YDL084W.305187	chrIV	305187	305190	UUG	119	48	YDL084W
YDL132W.224063	chrIV	224063	224066	UUG	60	239	YDL132W
YDL132W.224201	chrIV	224201	224204	UUG	198	101	YDL132W
YDL134C.220841	chrIV	220838	220841	UUG	401	69	YDL134C
YDL134C.221113	chrIV	221110	221113	UUG	129	341	YDL134C
YDL140C.210662	chrIV	210659	210662	UUG	-101	100	YDL140C
YDL145C.198201	chrIV	198198	198201	UUG	230	24	YDL145C
YDL145C.198287	chrIV	198284	198287	UUG	144	110	YDL145C
YDL160C.172100	chrIV	172097	172100	UUG	114	169	YDL160C
YDL171C.155819	chrIV	155816	155819	UUG	106	178	YDL171C
YDL190C.121681	chrIV	121678	121681	UUG	104	88	YDL190C
YDL190C.121773	chrIV	121770	121773	UUG	12	180	YDL190C
YDL195W.107171	chrIV	107171	107174	UUG	83	35	YDL195W
YDL224C.56477	chrIV	56474	56477	UUG	233	130	YDL224C
YDL234C.36515	chrIV	36512	36515	UUG	105	37	YDL234C
YDR028C.500910	chrIV	500907	500910	UUG	-31	30	YDR028C
YDR028C.501052	chrIV	501049	501052	UUG	-173	172	YDR028C
YDR033W.508037	chrIV	508037	508040	UUG	137	108	YDR033W
YDR033W.508062	chrIV	508062	508065	UUG	162	83	YDR033W
YDR034C.512137	chrIV	512134	512137	UUG	111	27	YDR034C
YDR062W.576221	chrIV	576221	576224	UUG	108	251	YDR062W
YDR062W.576352	chrIV	576352	576355	UUG	239	120	YDR062W
YDR072C.591401	chrIV	591398	591401	UUG	76	56	YDR072C
YDR072C.591433	chrIV	591430	591433	UUG	44	88	YDR072C
YDR074W.593836	chrIV	593836	593839	UUG	165	55	YDR074W
YDR086C.617228	chrIV	617225	617228	UUG	35	57	YDR086C
YDR093W.631197	chrIV	631197	631200	UUG	178	83	YDR093W
YDR111C.679804	chrIV	679801	679804	UUG	181	39	YDR111C
YDR122W.694441	chrIV	694441	694444	UUG	-258	257	YDR122W
YDR122W.694619	chrIV	694619	694622	UUG	-80	79	YDR122W
YDR143C.743916	chrIV	743913	743916	UUG	104	41	YDR143C
YDR148C.755108	chrIV	755105	755108	UUG	-19	41	YDR148C
YDR170C.802396	chrIV	802393	802396	UUG	-174	173	YDR170C
YDR178W.817891	chrIV	817891	817894	UUG	44	57	YDR178W
YDR186C.835511	chrIV	835508	835511	UUG	65	18	YDR186C
YDR206W.862021	chrIV	862021	862024	UUG	306	31	YDR206W
YDR219C.906920	chrIV	906917	906920	UUG	-68	67	YDR219C
YDR232W.927361	chrIV	927361	927364	UUG	161	89	YDR232W
YDR237W.936585	chrIV	936585	936588	UUG	113	28	YDR237W
YDR251W.960329	chrIV	960329	960332	UUG	22	283	YDR251W
YDR251W.960562	chrIV	960562	960565	UUG	255	50	YDR251W
YDR266C.1002080	chrIV	1002077	1002080	UUG	159	56	YDR266C
YDR276C.1013673	chrIV	1013670	1013673	UUG	11	29	YDR276C
YDR280W.1020714	chrIV	1020714	1020717	UUG	76	31	YDR280W
YDR284C.1031465	chrIV	1031462	1031465	UUG	235	45	YDR284C
YDR293C.1049421	chrIV	1049418	1049421	UUG	821	28	YDR293C
YDR298C.1058934	chrIV	1058931	1058934	UUG	26	119	YDR298C
YDR326C.1124984	chrIV	1124981	1124984	UUG	-59	58	YDR326C
YDR346C.1168712	chrIV	1168709	1168712	UUG	67	52	YDR346C
YDR348C.1171850	chrIV	1171847	1171850	UUG	174	24	YDR348C
YDR348C.1171897	chrIV	1171894	1171897	UUG	127	71	YDR348C
YDR351W.1178518	chrIV	1178518	1178521	UUG	-147	146	YDR351W
YDR352W.1181754	chrIV	1181754	1181757	UUG	142	45	YDR352W
YDR372C.1222211	chrIV	1222208	1222211	UUG	209	61	YDR372C
YDR380W.1234145	chrIV	1234145	1234148	UUG	33	71	YDR380W
YDR381W.1236510	chrIV	1236510	1236513	UUG	-40	46	YDR381W
YDR389W.1252305	chrIV	1252305	1252308	UUG	-231	230	YDR389W
YDR395W.1263282	chrIV	1263282	1263285	UUG	75	40	YDR395W
YDR397C.1266918	chrIV	1266915	1266918	UUG	57	19	YDR397C
YDR452W.1362821	chrIV	1362821	1362824	UUG	94	55	YDR452W
YDR457W.1369729	chrIV	1369729	1369732	UUG	54	59	YDR457W
YDR457W.1369769	chrIV	1369769	1369772	UUG	94	19	YDR457W
YDR505C.1459314	chrIV	1459311	1459314	UUG	135	93	YDR505C
YDR507C.1465833	chrIV	1465830	1465833	UUG	-47	46	YDR507C
YEL013W.128688	chrV	128688	128691	UUG	113	135	YEL013W
YEL020C-B.118110	chrV	118107	118110	UUG	8	729	YEL020C-B
YEL026W.101901	chrV	101901	101904	UUG	49	40	YEL026W
YER055C.265841	chrV	265838	265841	UUG	-30	55	YER055C
YER089C.337583	chrV	337580	337583	UUG	69	242	YER089C
YER091C.342222	chrV	342219	342222	UUG	15	54	YER091C
YER094C.349389	chrV	349386	349389	UUG	47	42	YER094C
YER100W.359535	chrV	359535	359538	UUG	251	25	YER100W
YER107C.374624	chrV	374621	374624	UUG	114	78	YER107C
YER114C.393870	chrV	393867	393870	UUG	-158	157	YER114C
YER125W.409764	chrV	409764	409767	UUG	-424	423	YER125W
YER125W.410132	chrV	410132	410135	UUG	-56	55	YER125W
YER132C.430630	chrV	430627	430630	UUG	-181	180	YER132C
YER139C.451278	chrV	451275	451278	UUG	68	34	YER139C
YFL009W.116081	chrVI	116081	116084	UUG	129	62	YFL009W
YFL036W.58710	chrVI	58710	58713	UUG	-71	70	YFL036W
YFL038C.56017	chrVI	56014	56017	UUG	-7	30	YFL038C
YGL008C.482716	chrVII	482713	482716	UUG	186	49	YGL008C
YGL028C.442937	chrVII	442934	442937	UUG	139	27	YGL028C
YGL044C.417062	chrVII	417059	417062	UUG	201	25	YGL044C
YGL097W.321761	chrVII	321761	321764	UUG	22	19	YGL097W
YGL115W.291955	chrVII	291955	291958	UUG	44	76	YGL115W
YGL133W.257644	chrVII	257644	257647	UUG	139	61	YGL133W
YGL135W.254614	chrVII	254614	254617	UUG	38	25	YGL135W
YGL202W.116018	chrVII	116018	116021	UUG	83	39	YGL202W
YGL206C.107562	chrVII	107559	107562	UUG	55	57	YGL206C
YGR014W.516702	chrVII	516702	516705	UUG	-240	239	YGR014W
YGR036C.558890	chrVII	558887	558890	UUG	143	21	YGR036C
YGR038W.560603	chrVII	560603	560606	UUG	60	77	YGR038W
YGR086C.650667	chrVII	650664	650667	UUG	31	49	YGR086C
YGR138C.765667	chrVII	765664	765667	UUG	219	60	YGR138C
YGR143W.775042	chrVII	775042	775045	UUG	-150	149	YGR143W
YGR175C.848466	chrVII	848463	848466	UUG	-16	42	YGR175C
YGR180C.856345	chrVII	856342	856345	UUG	-17	43	YGR180C
YGR193C.885790	chrVII	885787	885790	UUG	40	48	YGR193C
YGR218W.932370	chrVII	932370	932373	UUG	129	169	YGR218W
YGR218W.932497	chrVII	932497	932500	UUG	256	42	YGR218W
YGR240C.973781	chrVII	973778	973781	UUG	186	46	YGR240C
YGR247W.984939	chrVII	984939	984942	UUG	123	25	YGR247W
YHL003C.101931	chrVIII	101928	101931	UUG	86	47	YHL003C
YHL027W.51091	chrVIII	51091	51094	UUG	79	18	YHL027W
YHR007C.121717	chrVIII	121714	121717	UUG	108	33	YHR007C
YHR008C.123622	chrVIII	123619	123622	UUG	2	31	YHR008C
YHR026W.160742	chrVIII	160742	160745	UUG	14	100	YHR026W
YHR030C.170400	chrVIII	170397	170400	UUG	148	55	YHR030C
YHR050W.207585	chrVIII	207585	207588	UUG	115	67	YHR050W
YHR051W.209669	chrVIII	209669	209672	UUG	-35	34	YHR051W
YHR103W.320302	chrVIII	320302	320305	UUG	64	110	YHR103W
YHR103W.320363	chrVIII	320363	320366	UUG	125	49	YHR103W
YHR129C.364180	chrVIII	364177	364180	UUG	77	26	YHR129C
YHR142W.383498	chrVIII	383498	383501	UUG	94	38	YHR142W
YHR162W.422914	chrVIII	422914	422917	UUG	20	156	YHR162W
YHR162W.423015	chrVIII	423015	423018	UUG	121	55	YHR162W
YHR165C.437022	chrVIII	437019	437022	UUG	31	73	YHR165C
YHR183W.470909	chrVIII	470909	470912	UUG	27	49	YHR183W
YHR216W.554326	chrVIII	554326	554329	UUG	37	68	YHR216W
YIL048W.261369	chrIX	261369	261372	UUG	238	66	YIL048W
YIL052C.257106	chrIX	257103	257106	UUG	-12	42	YIL052C
YIL109C.160207	chrIX	160204	160207	UUG	45	41	YIL109C
YIL115C.148731	chrIX	148728	148731	UUG	-22	21	YIL115C
YIL117C.141589	chrIX	141586	141589	UUG	46	19	YIL117C
YIL125W.122519	chrIX	122519	122522	UUG	-169	168	YIL125W
YIL125W.122628	chrIX	122628	122631	UUG	-60	59	YIL125W
YIR031C.414798	chrIX	414795	414798	UUG	2	118	YIR031C
YJL047C.352184	chrX	352181	352184	UUG	44	75	YJL047C
YJL052W.338210	chrX	338210	338213	UUG	14	59	YJL052W
YJL079C.290821	chrX	290818	290821	UUG	117	46	YJL079C
YJL080C.289282	chrX	289279	289282	UUG	-56	55	YJL080C
YJL084C.278025	chrX	278022	278025	UUG	118	22	YJL084C
YJL101C.236403	chrX	236400	236403	UUG	96	46	YJL101C
YJL124C.187705	chrX	187702	187705	UUG	111	60	YJL124C
YJL174W.95016	chrX	95016	95019	UUG	40	74	YJL174W
YJR007W.450972	chrX	450972	450975	UUG	49	46	YJR007W
YKL101W.248824	chrXI	248824	248827	UUG	-95	94	YKL101W
YKL125W.208200	chrXI	208200	208203	UUG	37	45	YKL125W
YKL126W.205653	chrXI	205653	205656	UUG	155	52	YKL126W
YKL182W.100394	chrXI	100394	100397	UUG	-276	275	YKL182W
YKL184W.96700	chrXI	96700	96703	UUG	104	55	YKL184W
YKL216W.25195	chrXI	25195	25198	UUG	23	18	YKL216W
YKR028W.494156	chrXI	494156	494159	UUG	-100	99	YKR028W
YKR093W.615700	chrXI	615700	615703	UUG	65	28	YKR093W
YLR006C.164042	chrXII	164039	164042	UUG	26	148	YLR006C
YLR019W.180218	chrXII	180218	180221	UUG	237	68	YLR019W
YLR089C.320065	chrXII	320062	320065	UUG	254	49	YLR089C
YLR190W.534970	chrXII	534970	534973	UUG	77	242	YLR190W
YLR206W.554456	chrXII	554456	554459	UUG	-24	120	YLR206W
YLR220W.576771	chrXII	576771	576774	UUG	100	52	YLR220W
YLR223C.585563	chrXII	585560	585563	UUG	247	72	YLR223C
YLR224W.586286	chrXII	586286	586289	UUG	-30	176	YLR224W
YLR256W.646167	chrXII	646167	646170	UUG	48	246	YLR256W
YLR256W.646293	chrXII	646293	646296	UUG	174	120	YLR256W
YLR257W.658704	chrXII	658704	658707	UUG	83	120	YLR257W
YLR258W.660689	chrXII	660689	660692	UUG	41	25	YLR258W
YLR262C.668933	chrXII	668930	668933	UUG	248	41	YLR262C
YLR286C.710175	chrXII	710172	710175	UUG	192	38	YLR286C
YLR286C.710317	chrXII	710314	710317	UUG	50	180	YLR286C
YLR300W.728892	chrXII	728892	728895	UUG	36	61	YLR300W
YLR332W.790605	chrXII	790605	790608	UUG	301	69	YLR332W
YLR353W.834294	chrXII	834294	834297	UUG	424	56	YLR353W
YLR359W.844237	chrXII	844237	844240	UUG	63	43	YLR359W
YLR372W.867270	chrXII	867270	867273	UUG	61	82	YLR372W
YLR372W.867330	chrXII	867330	867333	UUG	121	22	YLR372W
YLR378C.877260	chrXII	877257	877260	UUG	123	81	YLR378C
YLR407W.932912	chrXII	932912	932915	UUG	190	53	YLR407W
YLR414C.954208	chrXII	954205	954208	UUG	46	63	YLR414C
YML016C.241591	chrXIII	241588	241591	UUG	264	54	YML016C
YML016C.241672	chrXIII	241669	241672	UUG	183	135	YML016C
YML071C.131615	chrXIII	131612	131615	UUG	33	42	YML071C
YML106W.56592	chrXIII	56592	56595	UUG	125	179	YML106W
YML106W.56630	chrXIII	56630	56633	UUG	163	141	YML106W
YML106W.56697	chrXIII	56697	56700	UUG	230	74	YML106W
YML117W.34219	chrXIII	34219	34222	UUG	122	22	YML117W
YMR001C.271207	chrXIII	271204	271207	UUG	-71	70	YMR001C
YMR089C.448160	chrXIII	448157	448160	UUG	125	73	YMR089C
YMR089C.448236	chrXIII	448233	448236	UUG	49	149	YMR089C
YMR108W.484042	chrXIII	484042	484045	UUG	150	40	YMR108W
YMR126C.521873	chrXIII	521870	521873	UUG	105	83	YMR126C
YMR139W.546062	chrXIII	546062	546065	UUG	168	61	YMR139W
YMR145C.556513	chrXIII	556510	556513	UUG	165	37	YMR145C
YMR148W.560277	chrXIII	560277	560280	UUG	170	87	YMR148W
YMR205C.674790	chrXIII	674787	674790	UUG	31	23	YMR205C
YMR216C.701142	chrXIII	701139	701142	UUG	75	102	YMR216C
YMR230W-A.733146	chrXIII	733146	733149	UUG	-121	120	YMR230W-A
YMR241W.751836	chrXIII	751836	751839	UUG	21	123	YMR241W
YMR241W.751918	chrXIII	751918	751921	UUG	103	41	YMR241W
YMR246W.759626	chrXIII	759626	759629	UUG	47	179	YMR246W
YMR246W.759779	chrXIII	759779	759782	UUG	200	26	YMR246W
YMR296C.860949	chrXIII	860946	860949	UUG	44	57	YMR296C
YMR305C.880276	chrXIII	880273	880276	UUG	93	43	YMR305C
YNL007C.619680	chrXIV	619677	619680	UUG	26	114	YNL007C
YNL064C.507169	chrXIV	507166	507169	UUG	121	71	YNL064C
YNL085W.466969	chrXIV	466969	466972	UUG	105	160	YNL085W
YNL085W.467082	chrXIV	467082	467085	UUG	218	47	YNL085W
YNL098C.440596	chrXIV	440593	440596	UUG	-12	25	YNL098C
YNL104C.426828	chrXIV	426825	426828	UUG	36	73	YNL104C
YNL186W.289393	chrXIV	289393	289396	UUG	49	103	YNL186W
YNL186W.289474	chrXIV	289474	289477	UUG	130	22	YNL186W
YNL189W.284206	chrXIV	284206	284209	UUG	139	52	YNL189W
YNL190W.282221	chrXIV	282221	282224	UUG	67	172	YNL190W
YNL190W.282332	chrXIV	282332	282335	UUG	178	61	YNL190W
YNL197C.269789	chrXIV	269786	269789	UUG	133	195	YNL197C
YNL201C.263266	chrXIV	263263	263266	UUG	198	62	YNL201C
YNL201C.263411	chrXIV	263408	263411	UUG	53	207	YNL201C
YNL207W.255293	chrXIV	255293	255296	UUG	66	58	YNL207W
YNL229C.220234	chrXIV	220231	220234	UUG	-33	32	YNL229C
YNL231C.217122	chrXIV	217119	217122	UUG	68	79	YNL231C
YNL288W.90250	chrXIV	90250	90253	UUG	89	51	YNL288W
YNL289W.87834	chrXIV	87834	87837	UUG	9	61	YNL289W
YNL291C.85917	chrXIV	85914	85917	UUG	110	101	YNL291C
YNR016C.661615	chrXIV	661612	661615	UUG	-241	240	YNR016C
YNR016C.661888	chrXIV	661885	661888	UUG	-514	513	YNR016C
YNR018W.664222	chrXIV	664222	664225	UUG	3	46	YNR018W
YNR074C.778796	chrXIV	778793	778796	UUG	80	57	YNR074C
YOL014W.299578	chrXV	299578	299581	UUG	74	113	YOL014W
YOL028C.271485	chrXV	271482	271485	UUG	107	114	YOL028C
YOL032W.265392	chrXV	265392	265395	UUG	60	35	YOL032W
YOL036W.256501	chrXV	256501	256504	UUG	150	242	YOL036W
YOL081W.170956	chrXV	170956	170959	UUG	-113	112	YOL081W
YOL103W.123898	chrXV	123898	123901	UUG	62	101	YOL103W
YOL123W.87681	chrXV	87681	87684	UUG	218	161	YOL123W
YOL123W.87708	chrXV	87708	87711	UUG	245	134	YOL123W
YOR008C.342456	chrXV	342453	342456	UUG	175	41	YOR008C
YOR043W.410739	chrXV	410739	410742	UUG	262	129	YOR043W
YOR043W.410841	chrXV	410841	410844	UUG	364	27	YOR043W
YOR061W.441475	chrXV	441475	441478	UUG	66	57	YOR061W
YOR090C.492899	chrXV	492896	492899	UUG	67	57	YOR090C
YOR090C.492917	chrXV	492914	492917	UUG	49	75	YOR090C
YOR094W.502736	chrXV	502736	502739	UUG	38	57	YOR094W
YOR116C.544220	chrXV	544217	544220	UUG	132	74	YOR116C
YOR117W.545002	chrXV	545002	545005	UUG	67	25	YOR117W
YOR142W.592878	chrXV	592878	592881	UUG	15	177	YOR142W
YOR153W.619733	chrXV	619733	619736	UUG	61	105	YOR153W
YOR153W.619756	chrXV	619756	619759	UUG	84	82	YOR153W
YOR161C.638642	chrXV	638639	638642	UUG	38	83	YOR161C
YOR198C.720134	chrXV	720131	720134	UUG	-36	68	YOR198C
YOR230W.770752	chrXV	770752	770755	UUG	4	46	YOR230W
YOR247W.797592	chrXV	797592	797595	UUG	150	82	YOR247W
YOR261C.816987	chrXV	816984	816987	UUG	37	55	YOR261C
YOR270C.830617	chrXV	830614	830617	UUG	128	42	YOR270C
YOR270C.830641	chrXV	830638	830641	UUG	104	66	YOR270C
YOR346W.981774	chrXV	981774	981777	UUG	110	52	YOR346W
YOR360C.1014865	chrXV	1014862	1014865	UUG	188	43	YOR360C
YOR370C.1031148	chrXV	1031145	1031148	UUG	186	153	YOR370C
YOR370C.1031277	chrXV	1031274	1031277	UUG	57	282	YOR370C
YPL016W.520728	chrXVI	520728	520731	UUG	-285	284	YPL016W
YPL019C.517038	chrXVI	517035	517038	UUG	115	19	YPL019C
YPL023C.506377	chrXVI	506374	506377	UUG	66	64	YPL023C
YPL049C.463877	chrXVI	463874	463877	UUG	11	37	YPL049C
YPL052W.458748	chrXVI	458748	458751	UUG	7	49	YPL052W
YPL106C.352300	chrXVI	352297	352300	UUG	16	24	YPL106C
YPL145C.279869	chrXVI	279866	279869	UUG	83	169	YPL145C
YPL179W.208128	chrXVI	208128	208131	UUG	141	27	YPL179W
YPL190C.187781	chrXVI	187778	187781	UUG	38	55	YPL190C
YPL221W.132856	chrXVI	132856	132859	UUG	45	185	YPL221W
YPL221W.133007	chrXVI	133007	133010	UUG	196	34	YPL221W
YPL228W.118312	chrXVI	118312	118315	UUG	74	68	YPL228W
YPL235W.103203	chrXVI	103203	103206	UUG	36	27	YPL235W
YPL239W.99413	chrXVI	99413	99416	UUG	8	69	YPL239W
YPL260W.49268	chrXVI	49268	49271	UUG	62	33	YPL260W
YPR008W.572967	chrXVI	572967	572970	UUG	267	49	YPR008W
YPR016C.593110	chrXVI	593107	593110	UUG	51	40	YPR016C
YPR016C.593153	chrXVI	593150	593153	UUG	8	83	YPR016C
YPR024W.610375	chrXVI	610375	610378	UUG	70	104	YPR024W
YPR038W.646260	chrXVI	646260	646263	UUG	-40	574	YPR038W
YPR103W.732298	chrXVI	732298	732301	UUG	18	49	YPR103W
YPR124W.786154	chrXVI	786154	786157	UUG	124	52	YPR124W
YPR125W.787890	chrXVI	787890	787893	UUG	26	69	YPR125W
YPR156C.839904	chrXVI	839901	839904	UUG	167	126	YPR156C
YPR185W.907172	chrXVI	907172	907175	UUG	265	44	YPR185W
