# Supplementary material for: Yeast eIF2A has a minimal role in translation initiation and uORF-mediated translational control in vivo
Source: eLife. 2024 Jan 24;12:RP92916. doi: 10.7554/eLife.92916 (PMC10945734; doi:10.7554/eLife.92916)
Supplement: Figure 7—source data 1. [file elife-92916-fig7-data1.xlsx]

## Sheet: Sheet1
motif	WT replicate 1	WT replicate 2	Average_WT	eIF2AΔ replicate 1	eIF2AΔ replicate 2	Average_eIF2AΔ	WT+SM replicate 1	WT+SM replicate 2	Average_WT
HEL	2.02786	1.57123	1.79955	2.23495	1.66008	1.94752	2.33923	1.57326	1.95625
HEN	1.38093	1.40594	1.39343	1.67539	2.08891	1.88215	1.27786	1.10914	1.1935
SPY	4.86842	6.11318	5.4908	4.7546	6.85115	5.80288	3.07758	3.22886	3.15322
SPP	9.98427	9.28562	9.63495	10.5485	10.2109	10.3797	6.73283	7.5764	7.15462
SPQ	5.68163	6.26156	5.9716	5.18527	6.14447	5.66487	4.37821	3.63393	4.00607
SPR	5.29499	5.75294	5.52397	4.41214	5.68285	5.04749	3.11767	3.37489	3.24628
SPS	5.15263	6.13657	5.6446	4.81846	5.37496	5.09671	2.87557	2.88207	2.87882
SPT	8.22727	8.09072	8.159	7.62705	8.70466	8.16585	4.54606	4.58893	4.56749
SPV	5.12828	5.97897	5.55363	5.45705	5.61407	5.53556	25.9358	25.2048	25.5703
SPH	4.66797	2.7937	3.73084	2.80196	3.87883	3.34039	3.44328	1.924	2.68364
SPI	3.45541	4.35447	3.90494	3.93177	4.48782	4.2098	2.37249	2.28276	2.32763
SPK	4.12495	6.08161	5.10328	4.14517	4.41313	4.27915	2.13337	2.1123	2.12284
SPL	3.10258	3.66204	3.38231	2.69006	3.68343	3.18674	2.5572	1.89954	2.22837
SPM	2.26769	4.12338	3.19554	2.87494	3.47763	3.17629	2.38612	1.22152	1.80382
SPN	4.68471	4.7869	4.73581	3.9361	4.54797	4.24204	2.15293	2.32136	2.23714
SPA	4.59075	4.92564	4.7582	4.47218	4.41327	4.44273	2.87116	2.93294	2.90205
SPD	5.2273	6.75876	5.99303	5.11104	6.93742	6.02423	2.86711	2.83981	2.85346
SPE	8.05423	9.66996	8.86209	6.37265	7.93812	7.15539	3.40843	3.5525	3.48046
SPF	4.16702	3.80466	3.98584	3.51684	4.42327	3.97005	2.79609	1.87014	2.33312
SPG	13.8756	12.409	13.1423	11.0096	12.3838	11.6967	6.25992	6.17337	6.21664
PQA	3.0572	3.20139	3.12929	3.36003	3.14554	3.25278	1.74745	2.35132	2.04938
PQD	2.42155	2.64017	2.53086	2.76949	3.49658	3.13303	2.00347	1.89166	1.94757
PQE	4.03489	5.21785	4.62637	2.87146	4.24728	3.55937	3.49516	2.43663	2.96589
PQF	2.64292	1.97448	2.3087	2.88613	2.91624	2.90119	2.92287	1.79388	2.35838
PQG	3.60674	4.0354	3.82107	3.45006	3.57266	3.51136	3.00913	1.92819	2.46866
PQH	1.06612	1.82534	1.44573	1.92865	1.50127	1.71496	1.45419	0.981798	1.218
PQI	4.86186	3.80063	4.33125	4.31106	4.39193	4.3515	2.54343	2.61432	2.57887
PQK	3.9711	5.16098	4.56604	3.79818	4.00561	3.90189	3.28672	2.76944	3.02808
PQL	2.43218	2.39477	2.41347	2.07954	2.0735	2.07652	1.68908	1.4669	1.57799
PQM	2.3004	1.66366	1.98203	1.64656	2.88721	2.26688	1.67766	1.5813	1.62948
PQN	2.42891	2.98876	2.70884	2.61427	3.05513	2.8347	2.61411	2.57156	2.59283
PQP	5.2231	5.4547	5.3389	3.88365	4.75783	4.32074	3.29777	2.4154	2.85658
PQQ	2.07278	2.48366	2.27822	2.18024	2.12387	2.15205	1.85531	1.77531	1.81531
PQR	3.88638	3.07583	3.4811	2.93896	3.59439	3.26668	2.03508	2.88487	2.45998
PQS	3.15469	2.95745	3.05607	2.68361	2.99615	2.83988	2.59074	2.10551	2.34812
PQT	2.41057	2.4756	2.44309	2.17201	2.32278	2.2474	1.14545	1.16085	1.15315
PQV	3.03115	3.37136	3.20125	3.59421	4.43361	4.01391	22.225	20.8592	21.5421
PQY	4.59519	6.29291	5.44405	4.55075	4.8671	4.70892	2.28126	2.78135	2.53131
ENA	3.65908	4.12864	3.89386	3.41897	3.73178	3.57538	2.2481	2.49909	2.3736
RFP	2.80764	3.02651	2.91708	3.0038	2.61133	2.80757	1.63862	1.3916	1.51511
RFV	1.80494	2.16551	1.98522	2.0718	2.37725	2.22452	16.1081	14.2843	15.1962
RFT	1.23027	0.988141	1.10921	1.76846	1.10555	1.437	0.414792	0.719199	0.566995
AIN	1.04623	1.12642	1.08633	1.26594	0.919314	1.09263	0.713228	0.528936	0.621082
GRV	2.1416	2.13963	2.14062	2.35955	2.66098	2.51026	16.7341	18.0838	17.409
GRT	1.49052	1.31175	1.40114	1.61257	0.91437	1.26347	0.980805	0.75986	0.870333
GRR	1.7803	1.84596	1.81313	2.9627	1.74163	2.35217	1.21147	2.07553	1.6435
GRS	1.80665	2.11008	1.95837	2.08802	1.69752	1.89277	1.19331	1.17653	1.18492
GRP	3.37863	2.78422	3.08142	2.38974	3.14962	2.76968	1.82501	1.45398	1.6395
GRQ	1.2628	1.88737	1.57509	2.00363	1.36412	1.68387	0.983853	0.802678	0.893266
GRY	3.3235	4.12144	3.72247	3.10112	4.12647	3.61379	1.71137	2.54493	2.12815
GRF	1.66131	1.21566	1.43848	2.21407	1.51112	1.86259	1.35046	1.40791	1.37918
GRG	3.1911	2.97276	3.08193	2.69348	2.92601	2.80975	2.55356	1.95761	2.25558
GRD	2.44401	3.13612	2.79007	3.32673	2.8171	3.07192	1.72308	2.12041	1.92174
GRE	4.22523	6.26051	5.24287	3.72693	4.73761	4.23227	2.62266	2.80865	2.71565
GRA	1.86666	2.56479	2.21573	2.50269	2.41738	2.46004	1.03861	1.23628	1.13745
GRN	1.66191	1.4953	1.5786	1.82738	1.74556	1.78647	0.997054	1.0156	1.00633
GRL	1.21926	1.61038	1.41482	2.00157	1.66598	1.83377	1.12996	0.831372	0.980665
GRM	1.8506	1.92519	1.88789	3.30095	1.6059	2.45343	0.795433	1.07557	0.935501
GRK	2.1649	2.20198	2.18344	2.5838	1.85892	2.22136	1.66476	1.51911	1.59194
GRH	0.456604	0.345609	0.401107	0.431266	0.600719	0.515993	0.318483	0.684212	0.501348
GRI	2.63817	2.66645	2.65231	2.87717	2.6633	2.77023	1.0462	2.00851	1.52735
HLY	2.43759	2.8359	2.63674	3.14595	2.51464	2.8303	2.13242	1.70298	1.9177
HLV	2.40779	2.7932	2.60049	3.3355	3.74075	3.53812	19.2829	20.3348	19.8089
HLT	2.24328	1.73853	1.9909	2.22148	2.00463	2.11306	1.15589	1.41514	1.28551
HLS	2.70189	3.60052	3.1512	2.82992	2.34625	2.58808	2.06822	1.29788	1.68305
HLR	2.5552	3.16261	2.85891	3.32792	2.49786	2.91289	2.31318	2.72029	2.51673
HLQ	2.02154	1.88051	1.95103	1.63194	2.54869	2.09031	1.46741	1.48318	1.4753
HLP	4.2752	3.67427	3.97474	3.31033	3.24707	3.2787	2.31079	1.56665	1.93872
HLN	1.5042	1.78243	1.64331	2.02221	2.19978	2.111	1.52464	1.50069	1.51266
HLM	2.52419	2.37638	2.45029	2.863	2.77162	2.81731	2.49199	1.2721	1.88205
HLL	2.17531	1.884	2.02965	2.85535	2.24603	2.55069	1.48915	1.20907	1.34911
HLK	3.00969	3.04789	3.02879	3.36118	3.33469	3.34793	2.05699	1.38668	1.72183
HLI	2.55895	2.45748	2.50821	2.97114	2.36317	2.66715	1.67357	0.795056	1.23431
HLH	1.24126	0.865321	1.05329	1.23091	1.36406	1.29749	1.00929	1.68228	1.34579
HLG	2.55566	4.43776	3.49671	3.69634	3.49726	3.5968	3.06761	1.95316	2.51039
HLF	1.87149	2.89573	2.38361	2.39443	2.21392	2.30417	0.768314	1.09508	0.931695
HLE	2.15437	2.31263	2.2335	2.64805	2.12476	2.38641	1.46195	1.71218	1.58707
HLD	1.139	1.69271	1.41585	1.49089	1.52534	1.50812	0.58999	0.690709	0.64035
HLA	3.68431	2.88541	3.28486	2.58506	3.13312	2.85909	1.21797	2.4069	1.81244
RFE	2.34624	2.50871	2.42748	2.76535	2.994	2.87968	1.50827	1.49552	1.50189
MDN	2.87677	1.89161	2.38419	1.46087	2.95345	2.20716	1.51274	1.25367	1.38321
ENW	6.51453	7.11979	6.81716	5.22195	7.85058	6.53627	3.08226	4.41836	3.75031
WSE	3.48322	3.36991	3.42657	3.53121	4.6555	4.09335	1.6569	1.62287	1.63989
HYE	1.87731	1.41767	1.64749	2.42672	2.20618	2.31645	0.939612	1.57784	1.25873
HYF	1.50761	2.35489	1.93125	1.16141	1.54491	1.35316	1.73258	1.14071	1.43664
WSF	3.39264	3.31391	3.35327	4.23425	3.09611	3.66518	1.97899	2.15001	2.0645
MDL	2.71075	2.83422	2.77249	2.29001	2.67072	2.48036	1.47837	2.06215	1.77026
RLM	2.24869	2.56031	2.4045	2.55	3.86858	3.20929	2.01892	1.66378	1.84135
RLL	1.72501	1.86659	1.7958	2.19678	2.1006	2.14869	1.23353	1.53453	1.38403
RLN	2.323	2.47617	2.39959	2.39341	2.14923	2.27132	1.38181	1.2075	1.29466
RLI	2.81212	2.53529	2.67371	2.9041	3.23297	3.06853	2.15136	1.74425	1.94781
EDG	4.33937	4.42984	4.3846	4.70288	5.38285	5.04286	2.72422	2.71242	2.71832
RLK	6.59746	4.53845	5.56795	7.36909	6.96079	7.16494	4.42332	5.16476	4.79404
EDE	3.285	3.18999	3.23749	2.98016	3.70616	3.34316	2.29211	2.73397	2.51304
LMP	5.48105	4.0628	4.77193	3.6449	3.01992	3.33241	3.04188	1.98736	2.51462
LMQ	2.95842	2.2275	2.59296	3.15638	2.24694	2.70166	0.892194	1.66211	1.27715
RLG	2.9352	2.86235	2.89878	3.8431	3.00225	3.42267	2.14437	2.21105	2.17771
EDI	3.23128	2.44715	2.83921	2.55159	2.72334	2.63747	1.84768	1.66099	1.75434
RLA	2.70067	2.57639	2.63853	2.71573	2.60072	2.65822	1.88785	1.87612	1.88198
HYR	3.19372	1.97455	2.58413	2.54303	4.25071	3.39687	1.11485	2.44275	1.7788
EDL	2.16445	1.94193	2.05319	1.93617	2.37183	2.154	1.25509	1.35215	1.30362
EDM	2.84089	2.35769	2.59929	2.48391	2.51227	2.49809	1.50404	0.991786	1.24791
EDR	4.65525	4.27996	4.4676	3.67504	5.0171	4.34607	2.63806	2.15482	2.39644
EDS	2.43722	2.01571	2.22646	2.18964	2.38607	2.28786	1.6393	1.38498	1.51214
EDP	5.1807	4.29545	4.73807	4.44779	4.51292	4.48035	2.86074	3.1133	2.98702
LMK	2.64151	2.57583	2.60867	2.5583	1.9412	2.24975	1.65984	1.51173	1.58579
EDV	2.30206	1.69569	1.99888	2.36213	2.51869	2.44041	17.7255	17.8405	17.783
EDT	1.76613	1.80104	1.78358	2.10948	1.75235	1.93092	1.10501	1.4063	1.25565
LMA	2.69608	2.48053	2.58831	2.87634	2.57319	2.72476	1.50353	1.81229	1.65791
RLW	1.85769	1.96923	1.91346	1.79633	1.71528	1.75581	1.29837	0.969029	1.1337
EDY	3.98231	4.6568	4.31955	3.43187	3.71099	3.57143	3.23782	2.35952	2.79867
LMD	1.6621	1.18537	1.42373	1.30806	0.829168	1.06861	0.656643	0.813101	0.734872
RLP	3.21321	4.98289	4.09805	4.78257	4.09272	4.43764	2.61977	2.28565	2.45271
RLS	1.80113	1.91382	1.85748	2.20775	2.18828	2.19802	0.95008	1.4423	1.19619
RLR	3.55199	3.15705	3.35452	4.39937	3.52841	3.96389	2.29707	2.96428	2.63068
DPV	6.78344	6.40411	6.59377	5.73813	5.31429	5.52621	27.3753	26.0712	26.7233
DPT	5.29473	7.08337	6.18905	5.46348	5.90084	5.68216	2.49788	2.47431	2.48609
DPS	5.18235	6.39895	5.79065	5.06378	6.18245	5.62312	3.65885	3.44728	3.55307
DPR	6.54802	7.23737	6.89269	6.03324	7.32099	6.67712	2.97183	3.50316	3.2375
DPQ	5.38453	4.22084	4.80269	3.46843	4.28763	3.87803	3.73089	2.54002	3.13546
DPP	8.97002	10.2696	9.6198	9.08162	12.0392	10.5604	6.19368	7.37808	6.78588
PLT	1.40563	1.26924	1.33743	1.76337	1.19061	1.47699	1.36318	1.49502	1.4291
DPY	5.72969	5.76425	5.74697	4.35324	6.21447	5.28385	2.45895	3.33265	2.8958
DPG	9.1624	10.3628	9.76257	8.26734	10.3774	9.32238	4.17307	5.51006	4.84156
DPF	5.59749	6.53309	6.06529	4.67811	5.39101	5.03456	2.81188	3.13726	2.97457
DPE	5.81326	7.3414	6.57733	5.14786	6.45271	5.80028	3.433	2.44608	2.93954
DPD	6.83405	6.33194	6.58299	6.09344	7.53763	6.81554	3.91601	4.35488	4.13544
DPA	6.63464	7.30387	6.96926	5.19387	5.20433	5.1991	3.01618	2.88302	2.9496
DPN	4.49178	5.37501	4.9334	4.90159	4.79489	4.84824	2.33226	2.27145	2.30185
DPL	4.12498	5.17239	4.64869	3.68427	4.22214	3.95321	2.2408	2.48808	2.36444
DPK	5.00434	5.76605	5.38519	4.57868	4.53686	4.55777	2.61928	2.9851	2.80219
DPI	4.49433	5.84716	5.17075	5.07605	5.11568	5.09587	2.93646	3.17194	3.0542
DPH	1.44677	1.74594	1.59636	1.18272	2.254	1.71836	1.21621	0.841821	1.02901
PNY	4.53055	5.06563	4.79809	3.85183	5.06449	4.45816	2.38267	3.49286	2.93776
CFL	1.16907	0.866199	1.01763	1.05603	2.12379	1.58991	1.33421	0.498124	0.916165
CFK	1.89266	1.14828	1.52047	1.93214	2.09921	2.01568	1.1322	2.02415	1.57818
CFI	1.07248	2.98869	2.03059	1.74128	1.40336	1.57232	0.690097	1.74638	1.21824
PNQ	2.89127	2.09932	2.49529	3.93255	2.56144	3.24699	2.23457	1.04663	1.6406
PNS	3.14075	3.25121	3.19598	2.89878	3.04517	2.97197	2.08573	1.94866	2.0172
PNR	6.11883	6.21533	6.16708	5.53576	5.20303	5.36939	5.19799	3.55031	4.37415
PNT	2.3881	2.11009	2.24909	2.37763	2.29805	2.33784	1.45356	1.40277	1.42816
CFA	2.5685	1.29492	1.93171	1.18227	1.93804	1.56016	1.08183	1.58348	1.33266
PNI	5.26212	5.8428	5.55246	5.33486	5.58372	5.45929	4.28902	4.53635	4.41269
PNH	1.58059	1.05773	1.31916	1.31822	1.687	1.50261	1.29599	2.15309	1.72454
PNK	3.37799	3.97934	3.67867	4.38616	4.39278	4.38947	2.59841	2.40242	2.50041
PNM	2.26377	1.91042	2.08709	2.39818	2.24705	2.32262	2.0643	1.85253	1.95841
PNL	3.00632	3.14156	3.07394	2.66413	3.10397	2.88405	2.25441	2.06227	2.15834
AIC	1.42353	1.79378	1.60865	2.04943	1.57707	1.81325	0.394152	1.39245	0.893299
PNN	2.50993	2.77182	2.64087	2.52594	2.99374	2.75984	2.70724	1.44272	2.07498
PNA	3.71193	3.97338	3.84266	3.56515	4.36417	3.96466	2.55301	2.40485	2.47893
CFT	0.766786	0.460576	0.613681	1.08423	1.13027	1.10725	2.09398	0.327025	1.2105
PNE	5.28713	5.27978	5.28346	4.4216	5.54428	4.98294	3.34908	3.75703	3.55306
CFS	1.99448	0.779191	1.38684	1.73834	1.05674	1.39754	1.47036	2.56504	2.0177
PNG	3.94885	4.07544	4.01214	3.90945	4.28198	4.09571	2.43695	1.92789	2.18242
PNF	2.96906	3.50757	3.23831	2.37499	3.75146	3.06322	2.37041	1.86945	2.11993
MRT	1.06505	1.61181	1.33843	1.44755	2.93038	2.18897	0.831939	0.792331	0.812135
MRQ	2.96027	1.78289	2.37158	1.68724	2.16462	1.92593	1.90965	1.62768	1.76867
MRR	2.66009	3.5157	3.08789	2.29274	2.2878	2.29027	2.53268	1.62973	2.0812
MRS	2.12817	2.70546	2.41681	2.00188	3.36946	2.68567	1.65913	0.623639	1.14139
MRL	1.10684	1.68967	1.39826	2.03584	2.29599	2.16592	1.14267	1.41154	1.2771
MRN	1.88578	1.91638	1.90108	1.61196	1.728	1.66998	1.50687	1.68969	1.59828
MRI	4.27977	4.30728	4.29352	4.06248	2.31469	3.18859	1.5976	2.56275	2.08018
MRK	2.65994	2.53081	2.59538	3.19413	3.31885	3.25649	1.99765	1.34265	1.67015
MRD	2.45763	3.22777	2.8427	1.44509	2.60769	2.02639	0.963034	1.56845	1.26574
MRE	4.73794	6.0738	5.40587	3.919	5.99756	4.95828	3.99447	2.72766	3.36107
MRF	2.36214	3.33534	2.84874	3.59679	1.71838	2.65759	1.8435	2.73742	2.29046
MRA	2.79206	2.42982	2.61094	3.48233	2.83647	3.1594	1.8256	1.87594	1.85077
APY	5.0886	6.2682	5.6784	4.29106	6.71612	5.50359	2.69691	2.34593	2.52142
APR	6.66553	7.45344	7.05948	5.47752	6.53163	6.00458	2.76196	4.39116	3.57656
APS	5.21922	5.74454	5.48188	4.83596	6.27885	5.5574	3.30571	2.81453	3.06012
APP	6.95585	7.38673	7.17129	6.77251	7.25097	7.01174	4.17726	3.68423	3.93074
APQ	3.88822	4.39274	4.14048	3.47019	3.87502	3.67261	2.28838	1.81816	2.05327
APV	5.43221	5.58977	5.51099	4.84369	5.6233	5.2335	24.0296	22.6511	23.3404
APT	4.8966	5.28872	5.09266	4.08854	4.0645	4.07652	2.68489	2.13451	2.4097
APK	5.06917	6.47266	5.77092	5.27468	4.68488	4.97978	2.66852	2.65449	2.6615
APH	1.98893	2.29139	2.14016	2.63031	2.50204	2.56618	1.596	1.75519	1.6756
API	5.96644	6.75342	6.35993	4.3763	4.97703	4.67666	3.50222	2.4506	2.97641
APN	5.77463	5.79681	5.78572	3.96387	5.06552	4.5147	3.23255	3.71861	3.47558
APL	3.79654	5.32569	4.56112	3.20192	4.55459	3.87825	2.07074	2.99173	2.53123
APM	3.98189	4.41528	4.19859	4.06504	3.50284	3.78394	1.66353	2.07098	1.86725
APA	5.73404	6.05281	5.89343	4.49465	4.86042	4.67753	2.61204	2.13584	2.37394
APF	4.50403	5.30589	4.90496	4.8094	4.83059	4.82	2.83307	1.99332	2.4132
APG	8.39435	9.04406	8.71921	7.72105	8.29424	8.00764	4.08828	4.29255	4.19042
APD	9.0253	7.14522	8.08526	6.23545	8.29703	7.26624	4.45985	4.94041	4.70013
APE	6.50342	7.77955	7.14149	6.61399	7.42252	7.01826	3.4956	3.22531	3.36046
YAY	1.72917	2.054	1.89159	2.5268	1.83762	2.18221	2.20127	1.53054	1.8659
YAT	2.25995	1.69947	1.97971	2.34602	1.89332	2.11967	1.33584	1.12408	1.22996
YAV	2.25584	1.69437	1.9751	2.92451	1.82238	2.37345	13.9339	15.7686	14.8512
YAQ	1.08588	0.569799	0.82784	0.981538	1.2259	1.10372	1.29782	1.09492	1.19637
YAP	1.85901	1.07754	1.46827	1.73492	1.48012	1.60752	0.894899	0.857012	0.875956
YAS	2.47768	1.73726	2.10747	2.097	2.57511	2.33605	0.911528	1.07631	0.993921
YAR	2.7685	1.76758	2.26804	2.89692	2.72557	2.81125	1.39282	2.28534	1.83908
YAM	2.12324	1.45334	1.78829	1.85076	1.34987	1.60032	0.890212	0.739738	0.814975
YAL	1.43764	1.00901	1.22332	1.34988	1.34777	1.34882	1.05235	0.879743	0.966045
YAN	1.43051	1.21661	1.32356	1.52881	2.09443	1.81162	1.11787	0.626359	0.872113
YAI	1.68998	2.17086	1.93042	2.16615	1.67668	1.92141	1.45267	1.4197	1.43618
YAK	2.21278	2.18715	2.19996	1.84325	2.25602	2.04964	1.58344	1.42322	1.50333
YAE	3.58421	3.49468	3.53945	3.32481	2.99049	3.15765	1.58005	1.7844	1.68223
YAD	2.24569	1.70884	1.97727	2.10882	2.30436	2.20659	1.52511	1.4117	1.46841
YAG	2.53917	1.87007	2.20462	2.22896	2.63986	2.43441	0.995945	1.38483	1.19039
YAF	1.91948	1.95889	1.93919	2.39525	1.58468	1.98996	1.00918	1.29672	1.15295
YAA	2.51332	2.28281	2.39806	2.43247	2.3079	2.37019	0.897312	1.22179	1.05955
IMA	1.43691	1.52379	1.48035	2.00882	1.41582	1.71232	1.39174	1.09678	1.24426
IMD	0.963203	0.473103	0.718153	0.759881	0.754257	0.757069	0.780841	0.805676	0.793259
PDY	4.35241	4.58809	4.47025	4.0812	4.12736	4.10428	2.18582	3.28942	2.73762
IMF	2.2958	1.77621	2.03601	2.66522	2.78622	2.72572	0.818639	1.03429	0.926464
CLD	0.505051	0.548023	0.526537	1.33011	1.05799	1.19405	0.487344	0.506109	0.496727
CLE	1.24127	1.8214	1.53134	1.74129	1.30975	1.52552	1.17874	1.08802	1.13338
CLF	1.3885	0.99343	1.19097	1.73023	1.17815	1.45419	1.42496	0.969802	1.19738
VCA	2.86653	2.37545	2.62099	2.29725	2.50946	2.40335	1.32612	1.87458	1.60035
CLG	2.77489	3.13854	2.95672	3.22606	2.81342	3.01974	2.16284	2.50823	2.33553
VCD	4.15942	3.10963	3.63453	2.13921	2.07444	2.10683	1.97226	2.13191	2.05208
VCE	4.94926	5.07757	5.01342	3.89932	4.10054	3.99993	1.79191	1.98601	1.88896
VCF	2.83133	4.69204	3.76168	3.32089	4.18617	3.75353	3.54281	2.18985	2.86633
VCG	3.11441	3.30395	3.20918	3.29656	7.46653	5.38155	2.51392	1.5865	2.05021
VCI	3.47678	3.99673	3.73676	3.68362	3.7955	3.73956	0.917459	1.91649	1.41698
VCK	2.04553	2.41349	2.22951	2.799	1.94553	2.37227	1.56745	2.11072	1.83908
VCL	2.31909	1.60894	1.96402	2.01582	2.91634	2.46608	1.10956	0.937045	1.0233
VCN	4.2788	5.27345	4.77612	2.79192	2.78261	2.78726	1.19126	0.746508	0.968883
PDR	5.09961	4.76324	4.93143	5.2946	5.90523	5.59991	3.21	3.31614	3.26307
VCS	3.1001	3.24006	3.17008	3.22156	2.99942	3.11049	1.20992	2.12455	1.66723
VCT	1.95829	1.97622	1.96726	2.67079	2.78784	2.72931	1.29313	0.995311	1.14422
VCV	2.48852	2.9114	2.69996	3.53172	3.15316	3.34244	13.2837	15.8416	14.5626
PDP	9.4974	7.94242	8.71991	8.08431	8.50639	8.29535	5.86868	5.1495	5.50909
WKI	1.6618	1.32371	1.49275	1.64201	1.89871	1.77036	1.19175	2.09957	1.64566
WKK	2.55587	2.39629	2.47608	2.20477	2.43122	2.31799	1.70788	2.03363	1.87075
WKL	0.937181	1.09571	1.01645	0.944444	1.20166	1.07305	0.8684	1.67801	1.2732
IMP	2.55169	2.51253	2.53211	4.36642	3.09488	3.73065	1.91198	2.02608	1.96903
WKA	4.01452	3.67282	3.84367	5.09542	3.16555	4.13048	2.63098	1.16087	1.89592
WKE	5.73042	6.68359	6.20701	5.9913	5.08323	5.53726	4.41784	2.91782	3.66783
PDM	2.86295	2.26825	2.5656	2.15027	2.2484	2.19934	1.32917	1.06509	1.19713
WKF	1.95553	1.95226	1.95389	2.16534	3.64633	2.90584	0.652681	0.825154	0.738918
WKY	2.66426	4.62073	3.6425	4.33588	3.50679	3.92134	2.38848	1.19273	1.7906
IMR	1.82294	1.11356	1.46825	1.49285	1.33903	1.41594	0.931428	0.937049	0.934239
WKS	3.15616	3.92141	3.53879	3.44812	2.96631	3.20721	2.16199	0.867678	1.51484
WKR	2.27899	2.2246	2.25179	3.20981	4.30384	3.75682	1.36847	1.3415	1.35498
WKT	1.16899	1.02871	1.09885	1.51218	1.14908	1.33063	0.83569	0.867706	0.851698
IMT	1.38362	0.658064	1.02084	1.36922	1.21888	1.29405	0.608949	0.52006	0.564504
IMV	1.16719	0.88979	1.02849	2.45765	1.55976	2.0087	9.87621	8.61662	9.24642
PDG	8.26107	7.06592	7.66349	6.76417	7.28965	7.02691	4.55203	4.10345	4.32774
MDT	2.63924	3.01838	2.82881	2.75124	2.22365	2.48745	1.08429	2.58958	1.83694
PDE	5.12663	5.77367	5.45015	4.54693	6.46803	5.50748	4.58167	4.27947	4.43057
PDD	6.00683	6.07234	6.03958	4.64139	5.71831	5.17985	4.96222	4.16556	4.56389
CLR	1.42387	1.54979	1.48683	1.5857	1.38956	1.48763	1.65491	2.3086	1.98175
DMA	1.92809	2.40361	2.16585	2.23109	2.12601	2.17855	1.29017	2.34387	1.81702
DMD	0.852073	0.538645	0.695359	0.865616	0.579342	0.722479	0.652229	0.881841	0.767035
DME	1.56923	2.40532	1.98728	1.68414	1.7198	1.70197	1.70554	1.34422	1.52488
DMF	1.76197	1.18609	1.47403	1.14999	1.83504	1.49252	0.869361	1.85207	1.36071
DMG	1.91267	1.88036	1.89652	2.29484	1.79933	2.04708	2.02061	3.46353	2.74207
DMI	1.79288	0.803474	1.29818	1.49867	2.26239	1.88053	1.84191	0.893348	1.36763
DMK	1.55294	2.50843	2.03069	2.46438	1.98509	2.22473	1.56918	1.47798	1.52358
DML	0.805146	1.13742	0.971283	0.516242	1.0992	0.807721	0.613267	0.387964	0.500616
DMN	1.26826	1.19045	1.22935	1.30215	0.947422	1.12479	0.328992	0.633771	0.481381
DMP	2.88023	1.515	2.19761	1.94883	4.01515	2.98199	1.57613	1.09839	1.33726
DMQ	0.442597	0.445426	0.444012	1.15425	0.386823	0.770539	0.61189	0.920068	0.765979
DMS	1.64369	1.26617	1.45493	1.69122	1.12519	1.40821	1.46394	0.66227	1.06311
DMT	2.00716	0.260151	1.13365	1.46209	0.960544	1.21132	0.50564	0.534507	0.520073
DMV	0.633455	0.774371	0.703913	1.52274	0.874247	1.19849	12.7842	13.5005	13.1423
PSK	2.26874	2.13683	2.20279	2.55984	2.23772	2.39878	1.51461	1.53816	1.52639
PSH	0.795027	0.44251	0.618768	0.904709	0.672595	0.788652	0.271751	0.601128	0.436439
PSI	3.18749	3.06426	3.12588	3.30576	3.43066	3.36821	1.69879	2.14694	1.92287
PSN	1.98684	1.79547	1.89116	1.81614	2.05696	1.93655	1.29235	1.53414	1.41325
PSL	1.9347	1.93977	1.93724	2.11776	2.27368	2.19572	1.5429	1.4652	1.50405
PSM	1.40448	1.02815	1.21631	1.01428	0.735777	0.875031	0.54216	1.37232	0.957237
PSA	2.66073	2.1963	2.42852	3.01656	2.31984	2.6682	1.91715	1.4421	1.67962
PSF	1.69868	1.12482	1.41175	1.59392	1.60909	1.6015	1.14281	1.40488	1.27385
PSG	3.07517	2.79458	2.93487	3.05599	3.29221	3.1741	2.93658	2.10105	2.51881
PSD	3.09803	2.43486	2.76644	2.76957	3.31047	3.04002	2.03052	2.15805	2.09429
PSE	3.44686	3.41578	3.43132	3.02428	3.24639	3.13534	2.11597	2.98393	2.54995
PSY	2.28029	2.46332	2.3718	2.246	2.28388	2.26494	1.32178	2.62442	1.9731
PSR	2.28066	2.03343	2.15704	2.42065	2.64733	2.53399	2.11451	1.7702	1.94235
PSS	2.7079	2.46707	2.58749	2.72945	2.41211	2.57078	1.68484	2.0935	1.88917
PSP	3.12057	2.20962	2.66509	2.81961	3.25229	3.03595	2.46639	2.46708	2.46674
PSQ	1.95014	1.248	1.59907	2.13723	1.97937	2.0583	1.51841	1.86646	1.69243
PSV	2.29865	1.96202	2.13034	2.46961	2.23627	2.35294	18.7584	20.341	19.5497
PSW	3.50137	2.59213	3.04675	2.44976	2.46678	2.45827	2.16413	1.93486	2.0495
PST	1.96659	1.67131	1.81895	1.92399	1.32318	1.62358	0.967815	1.16264	1.06523
HNA	3.45135	3.99925	3.7253	4.45542	3.98204	4.21873	1.55612	2.07248	1.8143
HNE	4.98296	4.15582	4.56939	3.7315	5.03308	4.38229	3.5304	0.986482	2.25844
HND	2.57634	2.89488	2.73561	2.33343	2.50758	2.4205	1.54418	0.94672	1.24545
HNG	3.80088	4.71203	4.25646	3.46165	3.17702	3.31933	3.39028	2.31101	2.85065
HNF	2.91215	3.54265	3.2274	3.7193	2.99408	3.35669	2.03409	3.04714	2.54061
HNI	3.89356	4.69049	4.29202	4.39968	3.73762	4.06865	2.37072	2.20116	2.28594
HNK	3.01307	3.10318	3.05813	3.17652	3.28863	3.23258	1.31715	0.842099	1.07963
HNL	2.52781	2.66099	2.5944	3.11	2.8132	2.9616	1.71919	1.47671	1.59795
HNN	1.97635	2.08886	2.03261	2.51286	1.92442	2.21864	0.955897	1.06129	1.00859
HNP	8.21369	7.98966	8.10167	8.20626	8.57932	8.39279	5.38361	4.83889	5.11125
HNS	3.90875	4.85435	4.38155	2.38267	3.52813	2.9554	2.64777	1.54123	2.0945
HNR	6.81701	7.57862	7.19781	6.75651	6.92992	6.84322	6.46772	4.48527	5.4765
HNT	2.68404	3.25151	2.96778	3.24973	4.0889	3.66931	2.26355	1.22963	1.74659
HNV	2.88679	4.70029	3.79354	4.09999	5.09232	4.59615	26.3567	23.2627	24.8097
HNY	4.03976	4.53335	4.28656	4.51464	4.84682	4.68073	1.65368	2.9038	2.27874
SRC	1.93674	1.26145	1.5991	2.75736	1.20585	1.98161	0.749403	0.635612	0.692508
SRA	3.05417	2.68572	2.86994	2.49276	2.95069	2.72173	1.73252	1.78792	1.76022
SRF	2.03414	2.32132	2.17773	2.2301	2.43549	2.33279	1.09305	1.52815	1.3106
SRG	3.7882	4.33091	4.05955	3.95432	3.72057	3.83745	1.95892	1.39263	1.67578
SRD	2.74198	3.40953	3.07576	2.85562	3.54059	3.1981	2.26108	1.63182	1.94645
SRE	4.45945	5.85962	5.15954	4.70564	4.83398	4.76981	2.33628	2.31845	2.32736
SRK	1.85895	1.96271	1.91083	2.05458	2.04646	2.05052	1.45808	1.54475	1.50141
SRH	0.674063	0.404449	0.539256	0.500388	0.311685	0.406036	0.54161	0.173901	0.357756
SRI	2.24909	2.69779	2.47344	3.30285	2.58049	2.94167	1.72821	1.8212	1.77471
SRN	1.79593	2.33394	2.06494	1.64819	1.83281	1.7405	1.03967	1.34751	1.19359
SRL	1.01518	1.07789	1.04654	1.15278	1.32514	1.23896	0.66024	0.727515	0.693877
SRM	1.43931	2.182	1.81066	2.3321	1.57328	1.95269	0.690342	0.832071	0.761206
SRR	2.21272	2.2542	2.23346	2.65224	1.91061	2.28142	1.79474	1.77253	1.78364
SRS	2.23155	2.06098	2.14626	2.76376	2.5407	2.65223	1.47435	1.41515	1.44475
SRP	3.08704	1.86739	2.47722	3.51288	2.64357	3.07823	2.39214	1.85787	2.12501
SRQ	1.72589	1.44167	1.58378	1.55305	1.80515	1.6791	1.13014	0.921923	1.02603
SRV	1.8601	1.54318	1.70164	2.38678	1.61764	2.00221	14.5839	15.552	15.0679
SRW	2.51356	1.26876	1.89116	1.89322	2.04804	1.97063	0.73046	1.75659	1.24352
SRT	1.04832	1.42967	1.23899	1.90602	1.71611	1.81106	0.962609	1.28156	1.12208
SRY	3.63975	3.38869	3.51422	3.51908	3.53831	3.5287	1.70253	1.64107	1.6718
TDK	3.7509	3.60186	3.67638	3.32307	3.6408	3.48194	2.97844	1.73738	2.35791
NMT	0.519964	0.710781	0.615372	0.885328	0.39873	0.642029	1.10975	0.655516	0.882635
TDH	3.00491	2.9755	2.9902	2.67709	3.59539	3.13624	2.30393	1.91178	2.10786
TDN	2.13113	2.99654	2.56384	2.62706	2.88998	2.75852	2.29015	1.80747	2.04881
NMP	2.14794	2.23246	2.1902	2.86475	2.02543	2.44509	1.75639	1.40744	1.58191
TDL	2.76459	2.65673	2.71066	2.60935	3.08211	2.84573	1.57588	1.39339	1.48464
TDA	3.45622	3.24534	3.35078	3.16513	2.95454	3.05984	1.96369	2.82697	2.39533
TDG	7.44632	5.84195	6.64413	5.6085	6.12782	5.86816	3.46228	3.91179	3.68703
TDF	3.83179	2.7352	3.2835	3.40385	3.10252	3.25318	2.40287	1.44011	1.92149
TDE	5.18883	5.24626	5.21755	4.91546	4.93804	4.92675	3.32284	2.76591	3.04438
TDD	2.60101	2.17525	2.38813	2.11938	2.53756	2.32847	1.45269	1.85092	1.65181
NMF	2.56301	1.25252	1.90777	1.1889	1.26695	1.22792	1.69134	0.970599	1.33097
NMG	1.52281	1.3018	1.4123	2.42171	1.71194	2.06683	2.3084	2.42836	2.36838
NMD	0.432108	0.904761	0.668434	0.431733	0.64321	0.537472	0.844676	0.333623	0.58915
NME	1.57856	1.5592	1.56888	1.6893	2.54712	2.11821	1.26951	1.20655	1.23803
NMA	1.64168	1.74796	1.69482	2.84215	2.25151	2.54683	2.24239	1.21247	1.72743
TDS	2.28774	2.48816	2.38795	2.75739	2.76346	2.76043	1.31313	1.81722	1.56517
TDR	3.91969	4.12207	4.02088	4.13394	5.1151	4.62452	2.77215	2.09339	2.43277
NML	1.73599	0.757031	1.24651	1.39524	0.95436	1.1748	0.647632	0.871773	0.759702
TDP	8.18637	7.15614	7.67126	8.33318	7.20722	7.7702	5.88423	3.95729	4.92076
NMK	0.70171	1.37566	1.03869	1.83639	1.10134	1.46886	0.757374	0.864335	0.810854
TDT	4.26457	3.44082	3.85269	5.43948	4.15256	4.79602	2.93831	3.26762	3.10297
FHL	2.45521	1.89594	2.17558	2.12504	1.9954	2.06022	1.59185	1.25246	1.42215
FHN	1.59734	1.49744	1.54739	2.1787	1.48516	1.83193	0.810805	0.453449	0.632127
FHI	3.07885	2.73404	2.90645	3.19209	2.77359	2.98284	0.707616	1.86564	1.28663
FHK	2.76231	4.86414	3.81322	3.31095	2.90691	3.10893	2.48128	1.37896	1.93012
FHE	4.39873	5.22194	4.81033	3.09978	3.28382	3.1918	3.06769	1.4369	2.25229
FHD	1.77674	2.75	2.26337	2.51879	3.66932	3.09406	0.933875	1.99644	1.46515
FHG	3.02254	2.26949	2.64601	3.1603	2.90341	3.03186	1.5083	1.19147	1.34988
FHF	1.87485	2.89512	2.38499	2.00198	3.13235	2.56717	1.69165	0.97276	1.33221
FHA	2.70042	1.87001	2.28522	3.30644	2.9108	3.10862	2.5355	1.51022	2.02286
FHY	2.05325	3.61156	2.83241	3.54774	4.38254	3.96514	1.46236	2.41761	1.93999
FHT	2.3795	3.43392	2.90671	2.48578	1.40418	1.94498	1.29452	0.85728	1.0759
FHV	2.81456	4.39631	3.60543	2.49365	2.26049	2.37707	17.3568	18.3419	17.8493
FHQ	1.82068	1.12147	1.47107	1.26078	0.75614	1.00846	1.04733	1.84592	1.44663
FHP	3.87977	4.07103	3.9754	4.33995	4.33085	4.3354	2.50007	2.40398	2.45202
FHS	3.27488	2.77592	3.0254	2.77832	2.27045	2.52439	1.75224	1.98765	1.86994
FHR	2.10061	1.7945	1.94756	2.21715	1.4638	1.84048	1.7191	0.920594	1.31985
PYY	1.76537	3.32601	2.54569	2.83881	2.7581	2.79845	1.84191	2.19434	2.01813
DRY	3.0846	4.63742	3.86101	3.26062	4.10704	3.68383	2.87098	1.87512	2.37305
DRQ	1.93383	2.46727	2.20055	3.38218	2.55657	2.96937	0.896241	1.31223	1.10424
DRP	3.42134	3.32393	3.37263	3.96705	3.57687	3.77196	2.27044	2.23874	2.25459
DRS	3.81886	3.68813	3.7535	3.0141	3.82827	3.42118	2.47858	1.98969	2.23414
DRR	2.81534	3.22329	3.01932	3.4249	2.53012	2.97751	3.17431	1.90218	2.53824
DRT	1.19371	0.997508	1.09561	1.39314	1.73438	1.56376	0.659839	0.704468	0.682154
DRV	1.88758	1.63684	1.76221	2.77272	1.79579	2.28425	13.6105	13.6172	13.6138
DRI	3.00995	3.40037	3.20516	3.06952	2.49849	2.784	1.91081	1.80687	1.85884
DRH	0.350715	0.699003	0.524859	0.898169	0.249156	0.573663	0.554391	0.52258	0.538485
DRK	3.07307	3.48677	3.27992	3.41377	2.62757	3.02067	1.51485	1.80505	1.65995
DRM	2.45392	1.98782	2.22087	2.28005	1.90312	2.09159	1.63404	1.31635	1.4752
DRL	1.50414	1.17463	1.33938	1.54965	1.38634	1.46799	0.771159	0.964979	0.868069
DRN	2.29175	1.90865	2.1002	2.04581	2.3069	2.17635	0.849928	1.42761	1.13877
DRA	2.72406	2.17045	2.44726	3.01103	2.86723	2.93913	1.93886	2.06506	2.00196
DRC	1.76745	0.84334	1.3054	2.33225	1.40282	1.86754	1.01832	0.691239	0.854781
DRE	4.35122	5.02936	4.69029	4.01576	4.28391	4.14984	2.1247	2.40762	2.26616
DRD	2.52704	1.90394	2.21549	1.95384	2.47718	2.21551	1.64705	0.959412	1.30323
DRG	4.06099	5.05139	4.55619	3.61952	4.81157	4.21555	2.47259	2.67667	2.57463
DRF	1.92867	1.81332	1.871	2.17039	2.38606	2.27823	1.22414	1.57405	1.3991
MFG	2.9372	4.81752	3.87736	5.03503	5.60234	5.31869	3.31052	2.24576	2.77814
MPF	3.06539	3.8604	3.4629	3.91841	4.13774	4.02808	1.61114	2.76916	2.19015
MPG	8.33735	8.16594	8.25164	9.03832	9.42795	9.23314	4.91565	3.93347	4.42456
MPE	5.59101	9.13083	7.36092	5.05506	5.93645	5.49575	3.31456	2.73181	3.02318
AVY	3.30117	5.00508	4.15313	3.44283	4.35673	3.89978	4.83676	5.35471	5.09573
MPA	4.57649	5.52763	5.05206	5.5996	4.9015	5.25055	2.83078	2.19642	2.5136
AVT	1.29264	1.01038	1.15151	1.41679	1.523	1.46989	1.78341	2.11917	1.95129
AVV	2.1992	1.67916	1.93918	2.29792	2.10096	2.19944	14.0305	15.1306	14.5805
AVP	3.17417	3.05015	3.11216	4.36245	3.1321	3.74727	3.05792	4.11761	3.58776
AVQ	1.50613	1.03157	1.26885	1.58839	0.934575	1.26148	2.1194	1.46292	1.79116
AVR	2.87182	2.54415	2.70799	3.34093	2.91825	3.12959	4.48105	3.60841	4.04473
AVS	1.63416	1.88858	1.76137	1.7909	1.5571	1.674	3.08745	3.51582	3.30164
MPV	5.87714	6.45167	6.16441	5.24858	5.77561	5.51209	27.5	26.3279	26.9139
AVM	2.22716	1.74369	1.98543	3.27266	2.76798	3.02032	3.61424	4.72296	4.1686
MPT	5.02517	4.71883	4.872	4.36876	3.10804	3.7384	2.15175	3.1856	2.66867
AVH	0.652267	0.510171	0.581219	0.572958	0.575645	0.574301	1.72888	1.01387	1.37137
AVI	2.31821	2.48039	2.3993	2.84022	2.24513	2.54267	3.85996	4.33454	4.09725
MPP	6.08791	4.68552	5.38671	4.12665	4.41576	4.27121	2.69105	2.6643	2.67768
AVK	3.05377	3.35375	3.20376	3.3393	2.88932	3.11431	3.52807	4.07099	3.79953
AVD	1.86038	1.38708	1.62373	1.78515	1.35726	1.5712	2.22118	3.30061	2.7609
AVE	2.58811	3.00548	2.79679	2.81557	2.28998	2.55278	3.52771	3.89822	3.71296
AVF	2.19621	3.09096	2.64358	2.90306	3.52302	3.21304	5.34403	6.24803	5.79603
AVG	2.77367	2.82773	2.8007	2.4749	2.12289	2.2989	4.12337	4.39729	4.26033
AVA	1.80804	2.05201	1.93003	2.13034	2.21489	2.17262	3.79435	4.10775	3.95105
AVC	2.13543	1.83808	1.98676	1.94107	2.20336	2.07221	2.40715	3.03893	2.72304
RMN	2.89372	1.81938	2.35655	2.10873	1.62648	1.8676	1.32612	1.38673	1.35642
MLY	3.34075	4.24565	3.7932	2.49034	4.82359	3.65696	1.82718	1.53917	1.68317
MFP	4.09681	2.85073	3.47377	4.0868	5.21711	4.65195	2.5011	2.16234	2.33172
MFR	3.38878	4.63511	4.01194	3.5474	2.07302	2.81021	1.685	2.97523	2.33011
YGG	5.57988	5.21103	5.39545	4.84829	6.28753	5.56791	3.01437	3.52453	3.26945
YGF	2.48792	2.73332	2.61062	2.34557	1.87992	2.11274	1.52994	1.95652	1.74323
YGE	7.72803	7.26159	7.49481	6.31079	6.02541	6.1681	3.90803	3.63503	3.77153
YGD	4.23859	3.942	4.09029	3.8107	3.92556	3.86813	2.20152	2.21131	2.20641
YGA	3.31124	2.62598	2.96861	2.6586	3.18831	2.92345	1.44142	1.69319	1.56731
YGN	3.31723	3.13179	3.22451	2.13045	2.46885	2.29965	2.48449	1.25165	1.86807
YGM	2.22002	2.83377	2.52689	2.06191	2.35848	2.21019	2.18867	1.11134	1.65
YGL	3.2022	3.27179	3.237	2.85653	3.61329	3.23491	1.63877	1.62619	1.63248
YGK	3.85388	2.88053	3.3672	2.955	3.12827	3.04163	1.86686	2.2206	2.04373
YGI	3.9685	3.83824	3.90337	3.74156	4.40766	4.07461	1.76142	2.06385	1.91263
YGH	2.39253	1.78947	2.091	2.15595	1.394	1.77498	1.76297	1.76398	1.76347
YGV	5.0481	3.4343	4.2412	4.41398	3.38646	3.90022	22.2341	23.5417	22.8879
YGT	4.91418	4.74209	4.82814	3.9304	3.7965	3.86345	1.76	2.88062	2.32031
YGS	3.21945	3.21428	3.21687	3.80969	3.12403	3.46686	2.31653	2.65915	2.48784
YGR	6.08308	5.43151	5.75729	5.3344	5.69435	5.51437	2.71089	2.96269	2.83679
YGQ	4.95952	2.97577	3.96764	2.95321	3.03938	2.99629	1.01849	1.65212	1.3353
YGP	3.17416	4.14188	3.65802	3.87859	3.15697	3.51778	2.88313	2.25288	2.568
YGY	4.13684	5.4426	4.78972	5.15635	4.35465	4.7555	3.65087	3.27754	3.4642
VAK	1.85965	1.59044	1.72505	2.16509	1.62177	1.89343	1.21114	1.2041	1.20762
VAH	0.706461	0.316095	0.511278	0.551974	0.387974	0.469974	0.250513	0.150718	0.200615
VAI	2.18726	2.00198	2.09462	2.41581	1.87925	2.14753	1.35382	1.0331	1.19346
VAN	1.79122	2.1853	1.98826	1.42549	1.62219	1.52384	1.10116	1.37394	1.23755
VAL	1.13933	0.869409	1.00437	1.11659	1.09749	1.10704	0.624124	0.674421	0.649273
VAM	1.65345	2.4747	2.06408	2.39303	1.2572	1.82512	0.95527	1.03158	0.993427
VAC	1.88432	2.14518	2.01475	1.68556	0.737138	1.21135	0.946702	0.897255	0.921979
VAA	2.7724	2.15421	2.4633	2.54199	2.5496	2.54579	1.3857	1.16457	1.27513
VAF	2.21677	1.92649	2.07163	1.74119	2.32138	2.03129	2.02978	1.93443	1.98211
VAG	3.32337	3.67129	3.49733	3.14659	3.33046	3.23853	1.49865	1.34074	1.41969
VAD	2.97715	2.01068	2.49392	1.8309	2.33458	2.08274	1.1134	1.29296	1.20318
VAE	3.43428	3.70715	3.57072	2.9193	2.96665	2.94297	1.65427	1.79529	1.72478
EDA	2.86119	2.70168	2.78143	2.66342	2.51061	2.58701	2.50072	1.50064	2.00068
VAR	1.97962	1.68005	1.82983	2.35567	2.13876	2.24721	0.751832	1.31303	1.03243
VAS	2.08031	1.89364	1.98697	2.16957	1.97829	2.07393	1.36957	1.25209	1.31083
VAP	1.67087	2.02223	1.84655	3.14144	1.67821	2.40982	1.47774	1.73625	1.60699
VAQ	1.76785	0.706974	1.23741	1.04666	0.912536	0.979597	0.420917	0.494881	0.457899
VAV	2.19825	2.61582	2.40704	2.67637	2.10893	2.39265	11.0013	12.2649	11.6331
VAW	1.5351	1.71066	1.62288	1.86338	1.82052	1.84195	1.98453	1.38846	1.68649
VAT	2.15254	1.31101	1.73178	1.9208	1.50077	1.71078	0.711338	1.03298	0.872158
RLH	0.738626	0.433097	0.585861	1.21391	0.800059	1.00699	0.377546	0.899356	0.638451
EDD	1.79363	1.47903	1.63633	1.64585	2.03673	1.84129	0.838403	1.25144	1.04492
RLE	3.36697	3.13617	3.25157	2.90889	3.47601	3.19245	2.04029	1.48572	1.76301
EDK	3.30073	2.40978	2.85526	2.87661	3.71458	3.2956	1.55478	1.96411	1.75945
LMR	3.50802	2.73342	3.12072	2.97855	2.71112	2.84483	1.70651	3.02131	2.36391
RLF	3.14751	3.50162	3.32456	3.17426	3.0565	3.11538	2.83011	2.35578	2.59295
EDN	2.09894	1.61305	1.85599	1.27164	1.72556	1.4986	0.999433	1.25594	1.12769
LMV	1.93053	2.12513	2.02783	2.29932	2.3109	2.30511	15.6926	15.076	15.3843
LMI	1.68737	2.0313	1.85934	3.26492	2.04833	2.65663	1.268	0.913815	1.09091
EDQ	3.32942	1.49185	2.41064	2.2626	2.54312	2.40286	1.31254	1.19263	1.25259
RLY	4.44032	5.36014	4.90023	4.94773	4.99466	4.97119	3.65481	2.87166	3.26324
EDW	5.56099	4.67893	5.11996	3.01994	4.94212	3.98103	5.15213	2.02723	3.58968
LMN	0.837638	1.55233	1.19498	1.45145	1.26014	1.3558	1.54008	0.622118	1.0811
RLT	0.942017	1.12513	1.03357	1.40245	1.47094	1.43669	0.584181	0.791464	0.687823
RLV	2.43291	2.81833	2.62562	2.89573	2.59863	2.74718	14.7218	16.1269	15.4244
RWL	2.92364	1.61108	2.26736	2.81177	2.60044	2.70611	0.988927	1.05025	1.01959
LME	3.20755	2.59567	2.90161	2.98777	2.83995	2.91386	1.52768	2.00273	1.7652
RWS	2.09055	2.7366	2.41357	2.65123	2.48362	2.56742	3.3256	1.68744	2.50652
LMF	2.00999	2.97634	2.49317	3.03081	3.19194	3.11138	2.02326	1.24005	1.63166
LMG	2.72928	2.64778	2.68853	2.66989	3.00705	2.83847	2.14239	1.58589	1.86414
HSI	2.76236	2.42652	2.59444	3.11631	2.24887	2.68259	1.96763	2.32573	2.14668
EQY	3.43009	4.81576	4.12292	3.99903	5.13108	4.56506	2.4552	2.73623	2.59572
EQQ	2.84522	2.45293	2.64908	2.41815	2.19594	2.30705	1.93193	1.28522	1.60858
EQP	6.24675	4.14138	5.19406	5.52113	5.4038	5.46247	2.42056	3.38713	2.90384
EQS	3.00556	2.51855	2.76205	2.62773	2.79257	2.71015	1.64585	2.15801	1.90193
STD	2.40027	2.3105	2.35539	2.00985	2.00517	2.00751	1.51811	1.74798	1.63305
STE	3.89093	4.88859	4.38976	3.27903	3.61405	3.44654	2.12924	1.94802	2.03863
STF	2.24808	2.95602	2.60205	2.61406	2.81765	2.71585	1.27182	1.90389	1.58785
STG	3.20603	2.77676	2.9914	2.92484	2.67329	2.79906	1.93786	2.39798	2.16792
STA	2.58413	2.71556	2.64985	2.88488	2.81039	2.84764	1.75969	1.70674	1.73322
STC	1.67693	2.09589	1.88641	2.3853	2.12828	2.25679	2.59469	2.13269	2.36369
STL	1.72684	1.84124	1.78404	1.90101	1.95572	1.92837	1.1161	1.21765	1.16687
STM	2.41999	3.05791	2.73895	3.09325	2.53512	2.81419	1.88957	2.25809	2.07383
STN	1.39312	2.04618	1.71965	1.31369	1.53395	1.42382	0.850691	1.1335	0.992095
STH	0.848954	0.74832	0.798637	0.915032	0.542892	0.728962	0.363827	0.475079	0.419453
STI	3.29555	3.05902	3.17729	2.7038	2.73297	2.71838	1.85136	1.69329	1.77233
STK	2.88438	3.05886	2.97162	2.82409	2.66081	2.74245	1.68154	1.7429	1.71222
STT	2.20879	1.89859	2.05369	2.20654	2.15946	2.183	1.48247	1.45047	1.46647
STV	2.81272	4.10705	3.45988	3.70718	3.12816	3.41767	19.1463	20.5622	19.8543
STW	2.8846	3.8693	3.37695	2.62468	2.86891	2.7468	2.33911	2.33577	2.33744
STP	3.82124	3.28215	3.55169	4.19548	3.57287	3.88417	2.05695	2.32523	2.19109
STQ	1.54856	1.71003	1.62929	1.62634	1.52734	1.57684	0.977741	1.05104	1.01439
STR	3.20486	2.74754	2.9762	2.98987	3.63213	3.311	1.66427	2.20289	1.93358
STS	2.29464	2.14852	2.22158	2.13616	2.0144	2.07528	1.20048	1.04339	1.12193
EQV	2.70672	3.27715	2.99194	2.78076	2.97193	2.87635	20.2665	20.0212	20.1438
STY	2.88599	3.84822	3.3671	2.31862	4.27431	3.29646	2.59987	2.94267	2.77127
TFM	2.20132	1.85725	2.02928	3.72478	2.47842	3.1016	2.1516	1.57808	1.86484
TFL	1.58728	1.64925	1.61827	1.43194	1.48631	1.45913	0.8301	1.54094	1.18552
TFN	1.22269	1.41555	1.31912	1.39007	1.08037	1.23522	1.27044	1.23022	1.25033
TFI	2.70885	2.74074	2.7248	2.31496	3.13115	2.72306	1.76391	1.6423	1.7031
TFH	1.8084	1.21476	1.51158	1.37558	1.27338	1.32448	0.408364	0.590844	0.499604
TFK	1.77367	1.8832	1.82843	2.20705	1.96116	2.0841	1.5641	1.26806	1.41608
TFE	2.9432	2.69929	2.82124	2.0351	3.18787	2.61148	1.72145	2.1842	1.95283
TFG	3.03002	3.8776	3.45381	2.57058	3.0825	2.82654	1.78327	2.80507	2.29417
TFF	2.47203	2.51434	2.49319	1.56641	2.76671	2.16656	1.32417	0.643946	0.984056
NCT	1.63521	2.038	1.8366	2.49376	1.89695	2.19535	1.95356	1.35029	1.65192
NCI	3.00501	2.58368	2.79435	2.32622	3.98788	3.15705	1.55301	1.08647	1.31974
NCK	2.66291	3.08601	2.87446	2.92349	3.07771	3.0006	2.14453	1.07046	1.60749
TFY	3.27639	3.80857	3.54248	2.83932	3.949	3.39416	2.24981	1.40595	1.82788
NCN	5.66287	1.68606	3.67447	3.2364	4.3871	3.81175	2.15823	1.47868	1.81846
TFT	1.34675	1.10862	1.22768	1.50851	1.22254	1.36553	0.815204	0.737069	0.776137
TFV	2.06102	1.58654	1.82378	2.44677	1.88938	2.16807	15.9919	15.9219	15.9569
TFQ	1.13571	2.08461	1.61016	1.72098	1.27362	1.4973	0.649388	1.00484	0.827112
TFP	3.14916	4.25915	3.70416	4.55334	3.50536	4.02935	1.87566	1.11166	1.49366
TFR	3.0721	3.44582	3.25896	4.13359	3.69517	3.91438	1.28616	1.39815	1.34215
LID	1.20791	0.71768	0.962795	1.13823	1.06168	1.09995	0.796258	0.817578	0.806918
LIE	1.7059	2.07641	1.89116	2.13536	1.81501	1.97519	1.34082	1.27367	1.30725
LIF	2.16952	1.91187	2.04069	2.4987	1.81609	2.1574	1.28963	1.35798	1.3238
LIG	2.14067	2.08773	2.1142	2.17699	2.15346	2.16523	1.24009	1.41816	1.32912
FNS	3.15425	3.71153	3.43289	2.97707	2.97446	2.97577	1.57382	1.44507	1.50945
LIA	1.40363	1.39874	1.40119	1.56396	1.25993	1.41194	0.992443	1.24513	1.11879
FNQ	1.47106	1.32432	1.39769	2.47062	1.91048	2.19055	1.30595	0.847993	1.07697
LIC	1.48206	1.61142	1.54674	1.57981	2.09409	1.83695	2.07394	1.50873	1.79133
LIL	1.50846	1.47401	1.49124	1.3832	1.29995	1.34157	0.755221	0.92215	0.838685
LIM	1.32791	1.31018	1.31904	1.47378	1.00476	1.23927	0.807682	0.459576	0.633629
LIN	0.914168	0.898744	0.906456	1.22	1.18316	1.20158	0.814894	0.48649	0.650692
EQN	2.07953	1.78875	1.93414	2.30843	2.7418	2.52512	1.37886	0.650831	1.01484
LIH	1.79712	1.01423	1.40568	1.29466	0.841388	1.06803	0.818854	0.983226	0.90104
ACA	3.20563	3.31032	3.25798	3.21509	2.21995	2.71752	2.41935	2.66162	2.54048
FNY	3.59081	3.38969	3.49025	4.0075	3.54261	3.77505	2.17187	3.02481	2.59834
LIK	1.66275	1.94014	1.80145	2.17773	2.09734	2.13754	1.07134	1.44818	1.25976
LIT	1.0666	0.928884	0.997741	1.20018	1.07708	1.13863	0.55444	0.384538	0.469489
FNF	2.37363	2.35812	2.36588	2.83364	2.68739	2.76052	2.09261	1.12074	1.60667
LIV	1.53373	1.71689	1.62531	1.80339	2.18802	1.9957	12.6805	13.9561	13.3183
FND	2.23809	2.37131	2.3047	2.199	2.58865	2.39383	1.65802	1.59052	1.62427
LIP	2.44633	2.53168	2.48901	2.83406	2.26804	2.55105	1.74126	2.02027	1.88076
LIQ	1.1762	1.34268	1.25944	2.12021	1.60493	1.86257	0.717555	0.695788	0.706671
FNA	3.54034	3.25687	3.39861	3.44095	2.87972	3.16034	2.14785	1.32372	1.73578
LIS	1.42773	1.47185	1.44979	1.76833	1.67847	1.7234	1.39705	0.958271	1.17766
FNN	1.82141	2.00685	1.91413	2.22646	1.95523	2.09084	0.919165	1.22195	1.07056
FNM	1.2929	2.06047	1.67668	2.22416	1.19466	1.70941	2.29545	0.776306	1.53588
FNL	2.09614	1.86919	1.98267	2.3614	2.48496	2.42318	1.71051	1.28607	1.49829
FNK	3.26582	2.68895	2.97739	2.98903	3.31846	3.15375	1.48902	1.72346	1.60624
LIY	2.45746	2.45163	2.45454	2.53145	2.40111	2.46628	2.24247	1.47034	1.8564
FNI	2.96671	3.76992	3.36832	3.5101	3.04278	3.27644	1.94937	1.70037	1.82487
FNH	1.12109	1.47631	1.2987	1.96359	1.23312	1.59835	0.568109	0.766583	0.667346
NEH	1.21222	1.01172	1.11197	1.00004	1.26728	1.13366	1.38525	1.05714	1.2212
EQE	2.99184	3.62986	3.31085	3.33933	4.13965	3.73949	2.09584	1.9339	2.01487
NEI	1.50432	1.35391	1.42911	1.71289	1.36746	1.54017	1.28824	1.15358	1.22091
EQD	1.73665	1.8352	1.78592	2.06799	2.77366	2.42082	1.69242	1.39488	1.54365
HFQ	2.19398	1.07366	1.63382	0.996154	2.07791	1.53703	1.24551	1.25898	1.25224
EQG	4.62343	3.44294	4.03319	3.28928	3.80626	3.54777	3.08889	2.22619	2.65754
HFP	3.55196	2.99717	3.27456	4.53315	2.78234	3.65775	1.48117	1.67824	1.5797
EQF	2.89185	3.901	3.39642	2.86537	3.08325	2.97431	1.58478	2.22562	1.9052
ACI	4.80773	4.33471	4.57122	3.19978	5.45104	4.32541	3.4497	2.65547	3.05259
NEE	1.79453	2.19079	1.99266	2.11192	2.49649	2.3042	1.47418	1.55036	1.51227
HFV	1.58203	2.51599	2.04901	2.05163	2.57912	2.31537	17.4047	14.56	15.9823
KAC	3.05175	4.4966	3.77417	3.33408	3.12837	3.23123	1.79849	1.18103	1.48976
HFI	1.86279	2.1431	2.00294	2.02507	3.65176	2.83841	1.56473	1.14517	1.35495
KAA	2.32517	2.27773	2.30145	2.24944	1.79503	2.02224	1.08775	1.08402	1.08589
KAG	2.28561	2.22468	2.25515	1.90209	2.02264	1.96236	0.916823	1.11912	1.01797
KAF	1.36463	1.74369	1.55416	1.95364	2.18194	2.06779	0.830614	1.42943	1.13002
KAE	2.70942	3.58611	3.14777	3.55778	3.05959	3.30869	1.52318	2.46938	1.99628
KAD	1.84852	1.41147	1.62999	1.65217	2.11764	1.88491	0.879644	1.24573	1.06269
KAK	2.95671	2.21114	2.58393	2.90262	2.55344	2.72803	1.88832	1.96533	1.92683
RHP	4.87399	6.41541	5.6447	5.09266	5.95005	5.52135	3.62436	4.04561	3.83498
KAI	2.22719	2.77915	2.50317	2.23271	2.39224	2.31247	1.54665	2.05881	1.80273
KAH	0.862433	0.642888	0.752661	1.05365	0.638242	0.845944	0.53026	0.606789	0.568524
KAN	1.16384	1.81333	1.48858	1.21556	1.71533	1.46545	0.874867	0.816343	0.845605
KAM	1.7045	2.22105	1.96277	2.02359	1.66074	1.84217	1.33543	1.27172	1.30357
KAL	1.42993	1.40252	1.41623	1.46107	1.31206	1.38657	0.956752	0.747948	0.85235
KAS	2.02388	1.75533	1.8896	1.88595	1.97171	1.92883	1.17051	1.40869	1.2896
KAR	2.63241	2.24112	2.43677	2.6866	2.059	2.3728	1.9165	1.76678	1.84164
RHK	8.56985	8.07005	8.31995	6.39343	9.16155	7.77749	4.77069	4.20618	4.48844
KAP	3.31803	3.03078	3.17441	3.88449	3.56666	3.72557	1.63675	1.42287	1.52981
KAW	1.76697	1.97616	1.87156	2.06527	1.88746	1.97637	1.56192	1.7595	1.66071
KAV	2.54389	2.53675	2.54032	2.45727	2.16925	2.31326	19.9337	21.0939	20.5138
KAT	1.49567	2.11277	1.80422	1.98531	1.4913	1.73831	0.97031	1.0287	0.999504
RHA	4.50291	3.6628	4.08286	4.33488	3.19187	3.76337	0.98361	2.41388	1.69875
RHE	3.66427	6.01569	4.83998	3.47561	4.02023	3.74792	1.46292	2.33643	1.89967
RHD	5.30047	3.76456	4.53252	3.01612	2.81231	2.91421	2.96293	1.28464	2.12379
RHG	4.00886	4.04147	4.02517	3.85939	4.14119	4.00029	3.70378	2.76317	3.23348
RHF	5.28664	5.4462	5.36642	4.00152	4.63067	4.3161	1.67352	3.2113	2.44241
SYH	0.873624	0.222003	0.547813	0.923284	1.17105	1.04717	1.46447	0.327494	0.895983
NEY	3.0011	2.16866	2.58488	2.60239	3.38946	2.99592	1.68322	1.64299	1.66311
SYN	1.14118	1.14046	1.14082	1.45489	1.52202	1.48845	0.822027	0.623038	0.722533
NEV	1.69939	1.65201	1.6757	2.51675	2.27267	2.39471	18.7846	19.3747	19.0796
VQT	2.95981	2.86311	2.91146	1.84644	2.67738	2.26191	0.969421	1.49915	1.23429
SYR	2.0928	1.68518	1.88899	1.90105	1.692	1.79652	1.63924	1.38572	1.51248
HFE	1.83332	2.36127	2.0973	2.31731	2.66979	2.49355	1.42583	1.65747	1.54165
SYQ	2.64584	1.03605	1.84095	1.29144	0.778715	1.03508	1.05547	1.23143	1.14345
HFD	0.760383	0.896603	0.828493	1.44356	1.26575	1.35465	1.49936	0.223847	0.861606
VQI	3.34018	4.07579	3.70798	3.00094	3.86194	3.43144	1.89182	1.17083	1.53133
HFG	2.29547	3.97937	3.13742	2.12076	2.32486	2.22281	1.22872	1.56388	1.3963
NEQ	1.28359	1.25859	1.27109	1.71954	1.23425	1.47689	1.00908	0.796342	0.902712
VQM	2.98886	2.72813	2.85849	3.01891	3.81537	3.41714	1.18613	1.52302	1.35458
ATF	2.90556	3.82801	3.36679	3.4459	2.92477	3.18534	1.56204	1.61657	1.58931
ATG	3.42476	3.22996	3.32736	3.53535	3.57496	3.55516	1.87714	1.65856	1.76785
ATD	2.63687	2.38196	2.50942	2.38438	2.318	2.35119	1.41827	2.05277	1.73552
ATE	4.51729	4.93545	4.72637	3.49223	3.48873	3.49048	2.57045	1.88012	2.22529
ATC	3.77182	2.92524	3.34853	4.43244	3.45818	3.94531	3.76922	1.4687	2.61896
ATA	3.35835	2.87942	3.11889	2.84633	2.56794	2.70713	1.34599	1.4987	1.42234
ATN	2.14182	3.02737	2.5846	2.29299	2.36416	2.32857	1.24464	1.31964	1.28214
ATL	1.96948	2.03824	2.00386	2.2765	2.10236	2.18943	1.33793	1.69342	1.51568
ATM	3.02147	3.48972	3.2556	3.77409	3.17218	3.47314	0.798315	2.20945	1.50388
ATK	4.22292	3.98513	4.10402	4.37146	3.83867	4.10507	2.44369	1.64929	2.04649
ATH	1.44468	1.46914	1.45691	1.03099	0.648282	0.839637	0.399996	1.32076	0.860378
ATI	3.54001	3.9382	3.7391	3.84966	4.18119	4.01543	1.77349	2.37005	2.07177
ATV	3.9513	3.89977	3.92554	4.14465	3.96278	4.05372	20.6697	21.0501	20.8599
ATT	2.24487	1.91083	2.07785	2.17799	1.80286	1.99042	1.20824	1.55359	1.38092
EMF	1.38865	1.81098	1.59982	1.64025	0.641141	1.14069	1.36846	0.797397	1.08293
ATR	3.67692	3.51401	3.59546	2.85787	3.80465	3.33126	2.01946	1.78446	1.90196
ATS	2.32581	2.2256	2.27571	2.42079	2.44676	2.43377	1.63109	1.26554	1.44831
ATP	3.94376	4.15696	4.05036	3.5787	3.71775	3.64823	2.77433	2.84817	2.81125
ATQ	1.82058	1.99008	1.90533	2.06827	1.86062	1.96445	1.51734	0.905118	1.21123
RGT	2.0004	4.46836	3.23438	3.39952	3.67	3.53476	1.74013	1.68562	1.71288
ATY	4.49266	5.41045	4.95155	4.61576	4.65082	4.63329	2.18828	2.09767	2.14297
RGY	4.23721	4.91327	4.57524	3.77395	4.06135	3.91765	2.84582	2.57352	2.70967
CFN	0.461487	0.47474	0.468114	0.807849	0.425273	0.616561	0.220083	0.179168	0.199625
RGA	1.92154	3.12189	2.52172	3.61729	2.79074	3.20402	1.53021	1.76848	1.64935
PNP	5.71678	5.10377	5.41028	4.10532	5.43726	4.77129	3.44395	3.15669	3.30032
RGD	3.89981	2.82519	3.3625	3.00659	4.20179	3.60419	2.27517	1.45242	1.86379
CFD	1.04061	0.600459	0.820536	0.911648	0.507784	0.709716	1.11396	1.93474	1.52435
RGE	4.87605	5.53716	5.2066	5.1882	5.7145	5.45135	2.96657	2.83164	2.89911
CFE	1.38619	2.63023	2.00821	1.28087	1.26165	1.27126	1.33118	1.19284	1.26201
RGF	3.40781	2.85749	3.13265	2.82824	2.46169	2.64496	1.73324	1.25642	1.49483
RGG	3.79608	3.88247	3.83927	3.80535	3.76587	3.78561	2.00357	2.68296	2.34326
PNV	2.98513	4.31774	3.65144	3.01713	3.93053	3.47383	21.4339	21.9181	21.676
EMY	2.9212	2.17539	2.54829	2.35713	1.95751	2.15732	1.32921	1.1709	1.25005
RGM	2.63995	3.06467	2.85231	3.45124	2.76518	3.10821	1.47882	1.11318	1.296
PHL	1.75674	0.991826	1.37429	1.22285	1.27138	1.24712	0.68591	1.09555	0.890728
CFV	1.05354	1.2692	1.16137	1.31149	1.79337	1.55243	16.1141	16.012	16.0631
PND	4.05634	4.58809	4.32221	4.08512	3.87258	3.97885	2.42166	2.53677	2.47922
EQR	5.21005	3.85879	4.53442	4.25268	5.05213	4.6524	2.30958	2.15368	2.23163
GDP	11.9706	8.25901	10.1148	9.23332	9.20057	9.21695	6.71728	6.24769	6.48249
MED	2.00883	2.54096	2.27489	1.51734	3.22743	2.37238	1.17391	1.17127	1.17259
GDR	4.74941	3.39166	4.07053	3.37316	3.59769	3.48543	1.74385	1.96426	1.85405
MEF	2.24985	3.22148	2.73567	2.55463	2.20155	2.37809	0.882696	1.59692	1.23981
MEA	3.76159	2.70076	3.23117	3.55286	2.84887	3.20087	1.60199	1.87768	1.73983
YEI	1.85979	2.1074	1.9836	1.86202	1.90295	1.88248	1.18627	0.8886	1.03743
YEH	1.84617	0.98183	1.414	2.0539	1.00345	1.52868	0.918159	0.978988	0.948574
YEK	3.27867	3.36889	3.32378	3.64008	3.36891	3.5045	1.84858	2.08519	1.96689
YEM	2.10128	2.27227	2.18677	2.44357	1.88481	2.16419	1.10703	1.30118	1.2041
YEL	1.40691	1.45912	1.43301	1.63473	1.6162	1.62547	1.04881	0.810561	0.929685
YEN	1.55812	1.14439	1.35126	1.594	1.28107	1.43753	1.24765	0.943727	1.09569
YEA	2.36598	2.99213	2.67905	2.64245	2.65429	2.64837	1.33803	2.41473	1.87638
YEE	2.19758	2.724	2.46079	1.87922	2.96984	2.42453	1.38882	1.3747	1.38176
YED	1.62899	1.11994	1.37446	2.04931	1.58278	1.81605	1.02317	1.65652	1.33985
YEG	3.49865	2.84918	3.17391	3.24598	3.63156	3.43877	1.38327	2.80005	2.09166
YEF	2.86857	2.01947	2.44402	2.16038	2.20374	2.18206	0.771737	1.40206	1.0869
YEY	2.84672	2.71411	2.78041	3.39991	3.28619	3.34305	2.89659	2.93537	2.91598
GDY	3.1257	3.20742	3.16656	3.44593	3.00211	3.22402	1.27196	3.08244	2.1772
YEQ	1.10644	1.18312	1.14478	1.4999	0.889938	1.19492	1.09491	1.61365	1.35428
YEP	2.87409	3.49119	3.18264	3.95108	3.24663	3.59885	2.04709	2.14127	2.09418
YES	2.00066	2.23498	2.11782	1.83528	2.01862	1.92695	1.36374	1.29934	1.33154
YER	2.86894	2.72819	2.79857	2.79009	3.11507	2.95258	1.45351	1.66633	1.55992
YET	2.02573	1.7293	1.87751	2.33472	1.05805	1.69638	1.11643	0.989979	1.0532
YEV	2.22699	2.43412	2.33055	2.61575	1.80249	2.20912	18.9492	18.422	18.6856
GDA	3.46858	2.54988	3.00923	2.8999	3.16911	3.03451	2.02535	2.06676	2.04606
GDD	2.67254	1.88365	2.27809	1.69993	2.00649	1.85321	1.85396	1.60876	1.73136
MEP	4.3481	4.05125	4.19967	5.82799	5.39881	5.6134	3.23223	3.06148	3.14686
VGL	3.64669	3.34339	3.49504	2.7697	3.36822	3.06896	1.31539	1.7949	1.55514
VGM	4.20413	4.09112	4.14763	4.68694	2.80767	3.74731	1.63426	1.51325	1.57375
VGN	2.11232	2.96608	2.5392	2.38658	2.63672	2.51165	1.27056	1.09177	1.18116
VGH	1.29813	0.947608	1.12287	1.26978	1.33077	1.30027	0.337027	0.456228	0.396627
VGI	5.33309	5.53188	5.43249	5.36095	5.942	5.65148	2.3534	1.86223	2.10782
VGK	4.65674	5.16165	4.9092	4.41968	4.73934	4.57951	1.72653	1.6009	1.66372
VGD	3.92746	3.8457	3.88658	3.88287	3.79756	3.84021	1.98343	1.96881	1.97612
VGE	5.06355	6.401	5.73228	5.38693	5.37385	5.38039	2.44266	2.86696	2.65481
VGF	2.82496	4.20449	3.51472	3.47495	3.39669	3.43582	2.3177	2.48218	2.39994
VGG	6.50665	5.80005	6.15335	5.91714	5.97274	5.94494	2.75039	3.05107	2.90073
VGA	3.99359	4.04312	4.01835	4.04325	3.45473	3.74899	1.48334	2.26096	1.87215
VGC	2.67803	2.98757	2.8328	3.89025	2.13606	3.01316	1.32726	2.09964	1.71345
VGY	4.64967	6.10314	5.3764	4.21665	5.26387	4.74026	2.20142	2.66255	2.43199
VGT	3.11262	3.44927	3.28095	3.45724	2.86883	3.16304	1.91612	1.53507	1.7256
VGV	4.8308	5.72099	5.2759	5.31434	4.90938	5.11186	16.5907	16.8793	16.735
VGP	4.83252	3.25561	4.04407	4.37809	3.39619	3.88714	1.76687	1.51084	1.63885
VGQ	3.15051	2.33938	2.74494	2.94528	2.32926	2.63727	1.27634	1.4049	1.34062
VGR	5.8322	4.87238	5.35229	4.27123	5.25897	4.7651	2.25722	2.41216	2.33469
VGS	3.61111	2.72857	3.16984	3.7732	3.20997	3.49158	1.35892	1.9828	1.67086
MEY	4.29875	4.26515	4.28195	3.60826	4.87613	4.24219	1.94172	2.31655	2.12914
FSA	1.72627	1.56734	1.64681	2.39549	2.11403	2.25476	1.5302	1.38838	1.45929
FSC	2.92585	1.96939	2.44762	3.75679	2.13039	2.94359	1.46147	0.92639	1.19393
FSD	1.86079	1.34641	1.6036	1.43031	1.6704	1.55036	1.45897	1.27623	1.3676
FSE	2.46398	3.20967	2.83682	2.02205	2.32087	2.17146	1.32011	2.14457	1.73234
FSF	1.6398	2.63138	2.13559	1.75086	1.90312	1.82699	1.52019	1.08729	1.30374
FSG	2.05888	2.09333	2.07611	2.4464	1.81252	2.12946	1.74017	1.31246	1.52631
FSH	0.865781	0.717748	0.791765	1.04042	1.28804	1.16423	0.225213	0.458772	0.341992
FSI	1.80612	2.22873	2.01743	1.68977	1.73577	1.71277	1.35436	1.10589	1.23013
FSK	2.52016	2.34642	2.43329	2.63747	2.64581	2.64164	1.56882	1.74038	1.6546
FSL	2.09873	1.73735	1.91804	2.20468	1.63981	1.92224	1.02201	1.42647	1.22424
FSM	1.86387	2.67762	2.27074	2.42255	1.99015	2.20635	0.740825	2.26972	1.50527
FSN	1.24885	1.26285	1.25585	1.73536	1.73762	1.73649	0.810767	0.908663	0.859715
FSP	3.83837	3.99347	3.91592	3.98727	4.59561	4.29144	1.77705	2.20235	1.9897
FSQ	1.37766	1.31111	1.34439	1.88212	0.945409	1.41377	1.02481	0.949478	0.987143
FSR	2.33521	1.91989	2.12755	2.32476	2.01625	2.1705	1.224	1.82518	1.52459
FSS	1.98009	1.93346	1.95677	2.50267	2.5121	2.50738	1.19172	1.19669	1.1942
FST	1.2964	1.37219	1.3343	1.94166	2.13232	2.03699	1.44957	1.3593	1.40443
FSV	2.13699	2.00713	2.07206	3.12012	2.02777	2.57395	17.8902	19.3899	18.6401
FSW	2.29932	3.54246	2.92089	4.36005	3.13464	3.74735	3.10546	2.31723	2.71134
FSY	4.11974	4.01856	4.06915	4.74947	3.48427	4.11687	2.77276	1.69703	2.23489
VHV	3.46314	2.30371	2.88343	3.59393	1.79177	2.69285	12.7636	13.9191	13.3414
VHL	1.09955	1.88707	1.49331	1.82899	1.75957	1.79428	0.697253	1.03213	0.864694
DIL	1.21472	1.20233	1.20853	1.37179	1.45026	1.41102	0.855524	1.02541	0.940465
DIM	0.939123	1.31447	1.1268	1.76336	1.44554	1.60445	0.809936	0.750243	0.78009
DIN	1.09465	0.822788	0.958718	1.20212	1.09067	1.14639	0.501028	0.698511	0.599769
DIH	0.443905	0.413302	0.428604	0.434369	0.458853	0.446611	0.203037	0.226146	0.214591
DII	1.32321	1.58546	1.45433	2.03602	1.76451	1.90027	1.09382	1.27827	1.18604
DIK	2.23575	2.29079	2.26327	2.406	2.16804	2.28702	1.11966	2.20898	1.66432
DID	1.06826	0.619888	0.844072	0.858825	1.43961	1.14922	0.788173	0.693406	0.740789
DIE	1.85267	1.84341	1.84804	2.36289	1.94482	2.15385	1.14989	1.36461	1.25725
DIF	1.52691	1.13985	1.33338	1.65801	1.71373	1.68587	0.89661	1.40702	1.15181
DIG	3.24436	2.78042	3.01239	3.88585	2.74091	3.31338	1.21331	2.67982	1.94656
DIA	1.4294	1.75182	1.59061	2.03019	1.621	1.82559	0.995196	0.964599	0.979897
DIC	1.05103	1.19579	1.12341	2.58859	1.71608	2.15234	0.742176	0.812487	0.777332
DIY	1.82753	2.84999	2.33876	2.23618	2.19358	2.21488	1.50099	1.44064	1.47081
DIT	0.964733	0.80526	0.884997	1.41091	1.0126	1.21175	0.327828	0.339524	0.333676
DIV	1.35417	1.55072	1.45244	1.74767	1.19277	1.47022	13.3208	14.0075	13.6642
DIW	1.90935	2.05003	1.97969	2.38341	2.12432	2.25386	1.4737	1.16516	1.31943
DIP	2.02948	1.93539	1.98243	2.91464	2.09122	2.50293	1.63285	1.50714	1.56999
DIQ	1.11402	0.534012	0.824015	1.25531	0.828892	1.0421	1.17546	0.988442	1.08195
DIR	2.6551	2.25733	2.45621	3.26935	2.29706	2.7832	1.87797	1.60166	1.73981
DIS	1.47944	1.8226	1.65102	1.4081	1.47923	1.44367	0.928119	1.19599	1.06206
EQA	3.74913	2.90439	3.32676	3.0087	3.11549	3.06209	2.00564	1.7868	1.89622
IRY	2.79267	4.61359	3.70313	2.3189	3.98165	3.15028	2.21796	2.46003	2.33899
IRP	4.33371	4.18601	4.25986	3.74028	4.03814	3.88921	1.91551	2.11759	2.01655
IRQ	1.93544	1.90576	1.9206	2.22234	1.26374	1.74304	1.28207	1.78113	1.5316
IRR	2.54904	2.18262	2.36583	2.52568	2.12718	2.32643	1.04645	1.50709	1.27677
IRS	2.09191	1.71305	1.90248	2.23598	1.56125	1.89862	1.67219	0.993706	1.33295
IRT	0.793215	1.00045	0.896831	1.53358	1.10703	1.3203	0.767035	0.479313	0.623174
IRV	1.70602	1.99078	1.8484	1.52297	1.79642	1.6597	10.6622	11.9349	11.2986
IRH	1.22302	1.23363	1.22832	0.978402	0.977458	0.97793	0.886678	0.865189	0.875934
IRI	1.81704	2.50633	2.16168	2.21242	1.95708	2.08475	1.34432	1.68532	1.51482
IRK	1.65619	1.49138	1.57379	2.08472	1.52861	1.80667	0.911112	1.30811	1.10961
IRL	1.17618	1.60549	1.39083	1.40936	1.21285	1.31111	0.701866	1.16595	0.93391
IRM	1.92593	2.46362	2.19477	1.89363	3.37726	2.63545	0.954823	1.26551	1.11017
IRN	1.31712	2.10647	1.71179	1.60066	1.56094	1.5808	0.937213	0.927216	0.932215
IRA	2.57809	1.96652	2.27231	2.49586	2.38691	2.44138	1.83084	2.02489	1.92786
IRC	1.91479	1.28304	1.59892	2.26371	2.9099	2.58681	1.42402	2.01915	1.72158
IRD	2.30284	1.99392	2.14838	1.81378	2.21886	2.01632	1.72095	1.27481	1.49788
IRE	3.66847	4.75045	4.20946	3.29208	3.87481	3.58344	2.7062	2.90093	2.80357
IRF	2.64273	1.60013	2.12143	2.54406	2.49416	2.51911	0.940875	1.34276	1.14182
IRG	3.58836	3.641	3.61468	3.12624	3.66029	3.39326	2.10269	1.27162	1.68715
EQC	2.38133	1.91914	2.15023	4.26486	2.54875	3.40681	1.66199	0.96646	1.31423
PWN	2.63852	2.43333	2.53592	1.12511	0.844863	0.984987	0.505068	1.47948	0.992276
NAA	2.01866	1.99556	2.00711	2.472	1.81636	2.14418	0.96177	1.25819	1.10998
NAF	1.4057	1.85265	1.62918	1.50501	1.25927	1.38214	0.858098	0.822818	0.840458
NAG	2.33855	1.60685	1.9727	2.1006	1.95582	2.02821	2.33419	1.24582	1.79
NAD	1.41916	1.3386	1.37888	1.31697	1.97475	1.64586	1.29869	1.16421	1.23145
NAE	2.47227	2.79612	2.6342	2.27509	2.49586	2.38548	2.05977	2.22166	2.14071
NAK	1.76975	1.98492	1.87734	2.06398	2.18254	2.12326	1.31152	1.49148	1.4015
NAH	0.376948	0.185716	0.281332	0.56967	0.68804	0.628855	0.146954	0.415609	0.281281
NAI	1.94509	1.90371	1.9244	1.74507	2.0606	1.90284	1.65593	1.15058	1.40326
NAN	1.18722	1.10132	1.14427	1.26115	1.49825	1.3797	0.927896	0.799093	0.863495
NAL	1.04217	1.31551	1.17884	0.880772	1.26088	1.07082	0.483473	1.12234	0.802908
NAM	1.13474	2.21262	1.67368	1.95245	0.708325	1.33039	0.781039	1.0916	0.936318
NAR	3.19273	3.33268	3.26271	2.67656	2.62203	2.64929	1.59886	1.67172	1.63529
NAS	1.34851	1.52755	1.43803	2.15098	1.62582	1.8884	1.03138	1.19376	1.11257
NAP	3.0671	2.0918	2.57945	2.67654	2.44018	2.55836	1.19455	1.09913	1.14684
NAQ	0.894361	1.09916	0.99676	0.977681	1.26468	1.12118	0.656019	0.676689	0.666354
NAV	1.97389	2.17229	2.07309	2.19508	2.16136	2.17822	16.8205	17.2997	17.0601
NAT	1.41413	1.2026	1.30836	2.11576	1.39717	1.75647	1.16114	1.34536	1.25325
NAY	2.52589	2.61013	2.56801	2.33035	2.79045	2.5604	2.07571	1.80661	1.94116
PEY	2.36797	2.39359	2.38078	2.49451	3.29107	2.89279	1.68713	1.55744	1.62228
ILN	1.0448	1.16499	1.10489	1.55958	1.44656	1.50307	0.876614	1.04124	0.958925
PEV	2.26156	2.08201	2.17179	2.21077	1.91819	2.06448	18.1206	18.7121	18.4164
SVN	1.19992	1.0468	1.12336	1.4218	1.28562	1.35371	1.41241	1.62526	1.51884
SVL	1.41906	1.45645	1.43775	1.4322	1.29906	1.36563	1.56085	2.05676	1.80881
SVM	1.39006	1.30051	1.34529	1.69747	1.65677	1.67712	2.00592	1.7051	1.85551
SVK	2.08997	2.20227	2.14612	2.71885	2.19203	2.45544	2.98149	3.11681	3.04915
SVH	0.546046	0.256167	0.401107	0.816767	0.498946	0.657856	0.407968	0.420451	0.414209
SVI	1.90103	1.85394	1.87749	2.2226	1.86385	2.04323	3.32423	3.23424	3.27923
SVF	2.22378	2.22051	2.22215	2.27385	1.93774	2.1058	4.17833	4.23066	4.2045
SVG	2.49651	2.2104	2.35345	2.38678	3.00483	2.6958	3.23971	4.05626	3.64799
SVD	1.71931	1.68198	1.70065	1.44232	1.65057	1.54645	1.85731	1.83829	1.8478
SVE	2.52738	3.08315	2.80526	2.31779	2.87745	2.59762	3.57449	3.13545	3.35497
SVC	1.07903	2.21725	1.64814	1.78683	1.55433	1.67058	2.28243	3.20471	2.74357
SVA	2.00809	1.62491	1.8165	2.31432	2.14978	2.23205	3.20779	3.97422	3.591
PER	3.25259	2.53105	2.89182	3.69369	3.15222	3.42296	1.74842	2.11869	1.93356
SVY	3.11735	2.79809	2.95772	2.66702	2.44191	2.55447	4.00126	4.91892	4.46009
SVV	2.16222	1.85509	2.00866	2.00013	2.09068	2.04541	12.5343	14.3894	13.4618
SVW	3.12323	1.01691	2.07007	1.62754	3.28974	2.45864	1.49548	1.84704	1.67126
SVT	1.07844	1.51243	1.29543	1.44141	1.25455	1.34798	1.37671	1.78081	1.57876
ILI	2.25468	2.20283	2.22875	2.64434	2.20938	2.42686	1.97672	1.53281	1.75476
SVR	2.083	2.93216	2.50758	1.99054	2.21775	2.10414	2.02117	2.12879	2.07498
SVS	1.29824	1.49411	1.39618	1.70633	1.30969	1.50801	2.40392	2.69513	2.54952
SVP	2.8776	2.25508	2.56634	3.68675	2.75266	3.2197	2.57322	2.12691	2.35006
SVQ	1.51493	0.872051	1.19349	0.952724	1.40471	1.17872	1.06675	1.23319	1.14997
ILV	1.66398	2.02063	1.8423	2.14204	1.82989	1.98597	14.1245	14.4247	14.2746
ILW	3.67889	2.5776	3.12825	3.28724	3.7144	3.50082	3.79228	3.21843	3.50536
ILT	1.60372	1.40997	1.50685	1.47575	1.52734	1.50155	1.04962	0.980342	1.01498
PEH	0.631844	0.531831	0.581838	0.709191	0.698287	0.703739	0.913068	0.517583	0.715325
PEI	2.06107	1.89499	1.97803	2.37337	2.37218	2.37277	1.44786	1.33408	1.39097
FLY	2.77727	3.35352	3.0654	3.50288	3.43799	3.47044	2.48337	1.71634	2.09985
LKL	1.50619	1.57845	1.54232	1.50858	1.59857	1.55357	1.18846	1.18539	1.18692
LKM	3.5772	3.06861	3.3229	2.04404	2.74217	2.3931	1.37984	1.22145	1.30065
LKK	2.94678	2.89933	2.92305	3.1539	2.78919	2.97154	1.6714	1.7965	1.73395
LKH	1.17706	1.14085	1.15895	0.967874	0.949645	0.95876	0.579743	0.763775	0.671759
LKI	1.95461	1.99699	1.9758	2.26003	2.41977	2.3399	1.40121	1.36564	1.38343
FLQ	1.17911	0.766073	0.972591	1.54263	0.857671	1.20015	0.968296	0.831516	0.899906
LKG	4.21486	5.33438	4.77462	4.17692	4.88661	4.53176	2.64304	2.35058	2.49681
LKD	2.27731	2.29864	2.28798	1.9989	2.31623	2.15756	1.65095	1.16689	1.40892
PEK	4.71027	4.73076	4.72052	4.10714	3.57217	3.83965	3.65825	2.28513	2.97169
FLT	1.64004	1.33559	1.48782	2.09015	1.70891	1.89953	1.08995	0.980645	1.0353
FLW	1.38804	1.7261	1.55707	1.51886	1.89935	1.70911	0.893209	1.39126	1.14223
LKA	3.55069	2.89722	3.22395	3.00079	2.64908	2.82493	1.79387	1.51032	1.6521
FLI	2.24974	2.63254	2.44114	2.71197	2.24091	2.47644	1.45026	1.51533	1.4828
FLH	0.603926	0.371046	0.487486	0.865089	0.59408	0.729584	0.4681	0.392085	0.430093
FLK	1.97588	1.85679	1.91633	2.17269	2.1482	2.16045	1.6164	1.11905	1.36773
FLM	1.70412	1.97322	1.83867	1.69546	2.28574	1.9906	1.20863	0.931096	1.06986
FLL	1.57767	1.75909	1.66838	1.8003	2.26367	2.03199	1.2064	1.29996	1.25318
LKY	3.52684	3.73423	3.63054	3.29692	3.43869	3.36781	2.16084	2.12454	2.14269
LKV	2.14822	2.51099	2.32961	2.45528	2.53204	2.49366	14.676	16.1862	15.4311
LKW	2.75494	3.34627	3.05061	3.5562	3.63499	3.5956	1.58012	3.06523	2.32268
LKT	1.53958	1.61018	1.57488	1.69469	1.43704	1.56587	1.15467	1.00592	1.08029
LKR	2.72755	3.20426	2.9659	2.97314	3.57051	3.27183	1.70389	1.92751	1.8157
LKS	2.56047	2.71145	2.63596	2.5133	2.58964	2.55147	1.45395	1.48913	1.47154
FLG	2.48717	2.4359	2.46153	2.66746	2.21961	2.44353	1.81678	1.80252	1.80965
FLF	1.4875	2.2567	1.8721	2.10511	1.90206	2.00358	0.843317	1.4199	1.13161
KCD	2.16626	3.04557	2.60591	2.46433	1.58292	2.02363	0.742042	1.79097	1.2665
KCG	4.60554	4.09901	4.35228	2.23089	2.87972	2.5553	2.36036	1.62408	1.99222
KCF	3.31931	2.61094	2.96513	2.10468	2.22643	2.16555	1.50447	2.62618	2.06533
KCA	2.84244	5.0459	3.94417	2.99718	3.70514	3.35116	2.06403	1.59805	1.83104
KCL	2.36044	3.0035	2.68197	2.21864	2.85293	2.53578	2.21032	1.22547	1.7179
KCN	1.7119	2.10701	1.90946	2.53442	1.50949	2.02196	2.0915	0.525546	1.30852
KCI	2.84625	3.57376	3.21001	2.70963	3.25803	2.98383	1.06984	1.93576	1.5028
KCK	6.30698	7.04822	6.6776	3.2856	4.49968	3.89264	3.03878	2.30235	2.67057
KCT	3.01109	2.50669	2.75889	2.11388	2.89801	2.50594	1.03484	1.10371	1.06927
KCV	3.81554	5.23015	4.52284	4.82969	3.89631	4.363	26.0909	29.5839	27.8374
KCQ	1.88662	1.84448	1.86555	1.24918	1.15629	1.20273	1.07076	0.619173	0.844966
KCP	11.1314	7.59574	9.36355	10.2936	8.17479	9.23419	4.39585	3.52464	3.96024
KCS	2.11659	3.51758	2.81708	2.62626	3.0141	2.82018	1.49396	1.61181	1.55289
KGQ	2.42936	1.45817	1.94376	2.25485	2.11697	2.18591	1.35596	1.18982	1.27289
KGP	5.18019	3.67373	4.42696	4.40632	5.21518	4.81075	1.96254	2.30762	2.13508
QDD	2.34481	2.37541	2.36011	2.32134	2.18367	2.25251	1.95984	1.25062	1.60523
QDE	3.03781	4.25672	3.64726	3.16116	4.18035	3.67076	2.81916	2.27609	2.54763
QDA	2.49806	3.38647	2.94226	2.72098	2.53008	2.62553	1.44826	1.74089	1.59457
KGY	2.45445	3.27344	2.86395	2.60077	2.84008	2.72043	1.68246	1.25003	1.46624
KGA	1.80827	1.76435	1.78631	1.64394	1.95063	1.79728	1.70989	1.24586	1.47788
KGC	2.35679	2.35662	2.3567	2.49154	3.26443	2.87799	1.66452	1.49871	1.58161
KGE	3.31353	4.01539	3.66446	2.94197	3.89347	3.41772	1.9916	1.36258	1.67709
KGD	2.15672	2.46631	2.31152	2.05499	2.24271	2.14885	1.2175	1.58901	1.40325
TKF	2.00337	1.87657	1.93997	1.82648	1.75033	1.78841	1.1906	1.63977	1.41518
KGG	3.88006	2.70479	3.29243	3.26121	3.64238	3.45179	2.02024	1.7513	1.88577
NLP	3.6541	2.65143	3.15277	3.53381	3.19895	3.36638	2.11033	1.69953	1.90493
QDQ	1.96491	2.04742	2.00616	2.3457	2.05315	2.19942	1.54854	0.950296	1.24942
NLS	2.28427	2.05458	2.16942	2.58927	2.16592	2.37759	1.21561	1.87064	1.54313
NDV	2.33988	1.97321	2.15655	2.13474	2.25048	2.19261	21.0177	19.3112	20.1645
NLR	2.28122	2.58253	2.43188	3.04668	2.8427	2.94469	1.6445	1.75256	1.69853
TKA	2.78969	2.48597	2.63783	2.81374	2.79625	2.805	1.3726	1.17931	1.27595
NLY	2.11672	2.16886	2.14279	2.84873	2.18544	2.51708	2.1762	1.61965	1.89792
QDY	4.44698	4.75793	4.60245	4.58399	4.83022	4.70711	1.97358	2.50608	2.23983
TKK	1.64267	1.76583	1.70425	1.8736	1.56539	1.7195	1.12668	1.49146	1.30907
TKH	0.389885	0.69026	0.540073	1.52655	0.542737	1.03464	0.0869998	0.989679	0.538339
TKI	2.17397	2.32456	2.24927	2.84478	2.27686	2.56082	1.60221	1.34085	1.47153
TKV	2.09751	2.04627	2.07189	2.51923	2.20861	2.36392	15.6024	17.7729	16.6876
TKW	2.10459	2.29921	2.2019	2.19108	1.5431	1.86709	1.04574	1.3909	1.21832
NLC	1.92706	2.12275	2.0249	2.96625	3.04605	3.00615	0.773153	0.501156	0.637155
TKR	2.3723	2.04984	2.21107	2.56795	2.85079	2.70937	1.47882	1.30762	1.39322
TKS	2.00036	2.48451	2.24243	2.04091	2.16092	2.10091	1.10097	1.41141	1.25619
NLG	4.40772	4.19218	4.29995	4.09274	3.97231	4.03253	2.47627	2.84443	2.66035
NLF	1.3911	1.10119	1.24614	1.63625	1.44533	1.54079	1.35875	0.89598	1.12736
NLH	1.97862	1.04185	1.51023	1.0589	0.999528	1.02922	1.08413	0.313809	0.698971
TKY	2.13392	3.1819	2.65791	2.91004	2.67226	2.79115	1.34646	1.91953	1.633
NLN	1.0781	1.01974	1.04892	1.30492	1.11019	1.20755	0.737398	0.904059	0.820729
RHS	2.88811	2.91328	2.9007	2.12458	1.98985	2.05722	1.55365	2.30062	1.92713
HML	0.883139	1.62872	1.25593	1.69404	1.56201	1.62802	0.486146	0.425997	0.456071
MKG	4.41727	5.39489	4.90608	4.6729	4.41446	4.54368	2.38748	1.77355	2.08051
MKF	1.71813	2.36761	2.04287	3.02375	2.64933	2.83654	1.92492	1.33362	1.62927
GNP	5.96342	6.3088	6.13611	5.77275	6.32613	6.04944	3.5107	3.21935	3.36502
GNQ	2.81886	2.81766	2.81826	2.47646	3.18419	2.83032	2.00052	2.02764	2.01408
AIY	3.10863	3.51887	3.31375	3.02063	3.46964	3.24513	2.45446	1.54008	1.99727
RHT	2.58954	4.13639	3.36297	1.82221	1.84048	1.83134	0.499607	1.49149	0.995548
MKA	3.09923	3.69285	3.39604	3.4751	2.7039	3.0895	1.3245	1.3934	1.35895
AIT	0.874024	0.693254	0.783639	1.72943	0.76976	1.2496	0.379037	1.1043	0.741667
VEV	2.78087	2.96021	2.87054	2.82101	3.00807	2.91454	15.4021	14.5785	14.9903
VEW	3.73592	2.21113	2.97352	2.82963	6.41125	4.62044	2.22316	0.978484	1.60082
VET	1.48975	1.2681	1.37892	1.83577	1.39664	1.6162	1.15675	0.995078	1.07591
MKL	1.942	2.22694	2.08447	1.45196	1.6064	1.52918	1.31064	1.47572	1.39318
VER	2.33011	2.13332	2.23171	2.47669	2.46682	2.47175	1.30321	2.12791	1.71556
VES	1.65566	1.67164	1.66365	2.08465	1.77177	1.92821	0.640717	1.27026	0.95549
VEP	4.02822	4.49462	4.26142	4.93258	4.21019	4.57138	2.22298	2.61303	2.41801
VEQ	1.198	1.06384	1.13092	1.60472	1.35704	1.48088	0.503112	0.708638	0.605875
AIQ	1.00958	0.484807	0.747192	0.899534	1.04679	0.973161	0.540313	0.483932	0.512122
VEY	3.88662	4.98216	4.43439	3.41406	4.49733	3.95569	1.69508	1.94927	1.82218
VEF	2.74704	2.55285	2.64995	3.06584	2.89888	2.98236	1.28748	1.67386	1.48067
VEG	2.80908	3.21707	3.01308	3.8641	3.83446	3.84928	2.32362	1.50192	1.91277
VED	1.58897	1.61383	1.6014	1.48673	1.7528	1.61976	1.01932	1.13264	1.07598
VEE	2.29824	2.57068	2.43446	2.31841	2.31095	2.31468	1.2984	1.66589	1.48215
VEC	2.61437	1.41009	2.01223	1.43315	1.49294	1.46304	0.599409	2.18478	1.39209
VEA	2.7025	2.49277	2.59763	2.38304	2.07737	2.23021	1.76011	1.64347	1.70179
VEN	2.0384	2.20654	2.12247	2.23537	2.40257	2.31897	1.2698	1.0439	1.15685
VEL	1.81148	2.15209	1.98178	2.06513	1.78121	1.92317	0.748026	0.853722	0.800874
VEM	1.27573	2.42592	1.85083	1.90573	2.0148	1.96027	0.77851	1.97199	1.37525
VEK	1.96897	2.65491	2.31194	2.52178	2.47718	2.49948	1.03822	1.14348	1.09085
VEH	1.6199	1.15462	1.38726	1.32703	1.12972	1.22838	0.422841	1.00618	0.714511
VEI	2.91475	3.05152	2.98313	2.60337	2.89294	2.74816	1.7358	1.89996	1.81788
MKV	2.86927	2.25684	2.56305	2.22317	2.20042	2.21179	16.9994	16.9383	16.9688
MKT	1.76886	2.53246	2.15066	1.81192	0.848418	1.33017	0.88696	2.28587	1.58641
MKS	2.3624	3.15295	2.75768	2.32868	2.00032	2.1645	1.42464	1.52418	1.47441
FIA	1.05085	1.13585	1.09335	1.2461	1.02812	1.13711	0.500969	0.627465	0.564217
GNG	4.50616	4.46452	4.48534	4.12383	5.14311	4.63347	3.49566	3.73631	3.61599
FQK	3.06	2.90883	2.98441	2.64697	2.56602	2.6065	2.87334	1.84338	2.35836
FQH	1.41354	1.71515	1.56435	1.07415	1.56471	1.31943	0.228742	1.89188	1.06031
FQI	3.08038	2.80817	2.94427	2.38167	3.24435	2.81301	1.89915	1.68355	1.79135
FQN	1.28512	2.72007	2.0026	1.68473	1.88284	1.78379	0.667837	1.2463	0.957067
GND	2.7029	3.74794	3.22542	2.7606	3.3793	3.06995	2.1267	2.01439	2.07055
FQL	2.22589	1.9621	2.09399	1.59545	2.2709	1.93317	1.12981	1.42428	1.27704
FQA	2.64214	2.03999	2.34106	2.36339	2.65197	2.50768	1.56804	0.732432	1.15024
FQF	1.77776	2.75377	2.26576	2.8306	1.62116	2.22588	2.61663	1.78742	2.20203
FQG	3.27511	4.84591	4.06051	3.5387	3.71055	3.62462	2.22816	1.7877	2.00793
FQD	1.59241	1.89007	1.74124	2.14613	2.08479	2.11546	1.57941	1.56091	1.57016
FQE	2.94439	3.24112	3.09275	2.87632	3.31418	3.09525	1.94353	1.65222	1.79787
FQY	4.56475	4.64838	4.60657	3.84211	3.63956	3.74084	2.45395	1.86426	2.1591
AID	0.824993	0.761958	0.793475	0.999317	1.24288	1.1211	0.90772	1.00098	0.95435
FQR	2.62191	3.09321	2.85756	3.6072	2.45589	3.03154	1.91426	2.09848	2.00637
FQS	2.32107	2.33161	2.32634	2.30082	3.17588	2.73835	1.33466	1.8671	1.60088
FQP	3.36442	4.61438	3.9894	2.93969	3.81755	3.37862	2.94714	1.87438	2.41076
FQQ	2.02674	1.90024	1.96349	1.75798	1.70693	1.73246	1.20415	0.915837	1.05999
FQV	2.95786	3.47089	3.21437	3.27658	2.95371	3.11514	20.4776	22.6468	21.5622
AIG	2.42369	1.56749	1.99559	2.32707	1.72	2.02353	1.37684	1.71494	1.54589
FQT	2.58122	1.65075	2.11598	2.12086	2.33649	2.22868	1.59752	1.28463	1.44107
GNI	5.1233	5.52019	5.32174	5.03842	5.29801	5.16821	2.85312	3.02973	2.94142
GNN	2.02805	2.32738	2.17772	1.89546	2.61023	2.25285	1.35273	1.17979	1.26626
GNL	2.94886	3.52333	3.2361	3.39375	3.1816	3.28767	2.04876	1.77869	1.91373
SYI	1.35242	1.50083	1.42662	1.50577	1.5424	1.52409	1.12323	1.48964	1.30643
RSL	1.9701	3.15899	2.56455	2.20739	2.21815	2.21277	1.27802	1.50776	1.39289
RSM	1.85896	1.66606	1.76251	2.37948	3.64285	3.01117	1.07281	1.27077	1.17179
RSN	1.73751	2.01377	1.87564	1.89346	2.09699	1.99522	1.40603	0.938015	1.17202
SSF	2.2009	2.05232	2.12661	2.18167	2.50627	2.34397	1.57511	1.84695	1.71103
RSH	1.16183	0.411018	0.786423	1.09304	0.993464	1.04325	0.7568	1.02939	0.893096
RSI	3.18307	3.25497	3.21902	3.08336	2.58464	2.834	1.59141	1.78297	1.68719
RSK	4.97907	5.36893	5.174	4.93164	5.4303	5.18097	2.96	3.21903	3.08952
RSD	1.79221	1.87829	1.83525	2.04324	2.19936	2.1213	0.721447	1.77153	1.24649
RSE	2.95515	3.18514	3.07014	3.56064	3.1215	3.34107	1.86153	2.56509	2.21331
RSF	2.64239	2.348	2.49519	2.8494	2.36719	2.6083	1.97479	1.70746	1.84113
RSG	2.19368	2.22759	2.21063	2.33854	2.18667	2.26261	1.94243	1.2878	1.61511
RSA	2.23839	2.04116	2.13978	2.76838	1.86734	2.31786	1.41873	1.14654	1.28263
RSC	1.89301	2.83675	2.36488	3.19136	2.96763	3.07949	3.08472	1.23877	2.16175
RSY	3.34772	3.49978	3.42375	3.8282	3.45045	3.63933	1.66113	1.86041	1.76077
RST	1.68209	1.57005	1.62607	2.40998	1.97193	2.19095	0.896755	1.38957	1.14316
RSV	3.36811	2.92108	3.1446	2.7502	3.14865	2.94943	19.1939	21.1165	20.1552
RSP	2.94218	2.84132	2.89175	3.52412	3.85882	3.69147	1.90911	1.98862	1.94887
RSQ	2.05426	1.65066	1.85246	2.30286	1.36492	1.83389	0.904903	1.48335	1.19413
RSR	4.05744	4.17872	4.11808	3.92167	4.32612	4.1239	2.81689	3.11333	2.96511
RSS	1.99686	2.20175	2.09931	2.21957	2.13901	2.17929	1.02953	1.3326	1.18106
DKV	2.20269	1.80973	2.00621	2.64755	2.25941	2.45348	13.2802	14.896	14.0881
DKW	3.56692	2.23626	2.90159	2.26645	2.17424	2.22034	1.97891	2.63393	2.30642
DKT	1.23392	1.25207	1.24299	1.87003	1.43833	1.65418	0.914589	0.88488	0.899735
DKR	3.87053	3.56157	3.71605	3.70784	3.0156	3.36172	1.98014	1.73412	1.85713
DKS	2.56403	3.11474	2.83939	2.91757	3.04922	2.9834	1.68407	2.00547	1.84477
DKP	4.34299	3.20507	3.77403	3.78759	3.02141	3.4045	1.72341	2.22994	1.97667
DKQ	3.2268	2.52148	2.87414	2.77877	2.99053	2.88465	1.14587	1.7413	1.44359
DKY	2.78411	2.31454	2.54932	2.31453	2.69197	2.50325	1.82726	1.63496	1.73111
DKF	1.70519	1.63108	1.66814	2.0432	1.99413	2.01867	1.32079	0.864608	1.0927
DKG	7.48278	8.02064	7.75171	6.58034	8.53768	7.55901	4.94992	4.11517	4.53255
DKD	2.18091	2.66861	2.42476	2.08385	2.48096	2.2824	2.00718	1.52996	1.76857
DKE	4.13566	5.07489	4.60528	3.72415	4.53336	4.12876	2.3175	2.33479	2.32615
DKC	1.87601	1.68655	1.78128	1.65363	2.16788	1.91076	1.17293	1.98548	1.5792
DKA	3.78213	3.87718	3.82966	3.13306	3.63175	3.3824	2.26068	1.75026	2.00547
DKN	1.60731	2.30345	1.95538	1.77109	1.87722	1.82416	1.65101	1.21485	1.43293
DKL	1.27371	1.4955	1.3846	1.36076	1.51557	1.43817	1.17849	0.902536	1.04051
DKM	2.53937	1.85684	2.19811	2.42414	1.69551	2.05982	2.58324	0.7467	1.66497
DKK	1.77389	2.51265	2.14327	2.52148	1.84283	2.18216	1.24715	1.8392	1.54318
DKH	0.731635	1.00984	0.870738	0.780458	0.765312	0.772885	0.407076	0.241854	0.324465
DKI	1.92527	1.91594	1.9206	1.95779	1.81763	1.88771	1.29649	1.32256	1.30952
IPA	4.93471	5.03996	4.98734	4.30731	4.54258	4.42494	1.92932	2.06234	1.99583
IPF	3.90177	4.54619	4.22398	3.19615	4.25018	3.72316	1.70209	1.93671	1.8194
IPG	9.8333	10.8699	10.3516	7.98283	9.04885	8.51584	4.20943	4.08836	4.1489
IPD	6.89561	7.58359	7.2396	5.79034	6.27912	6.03473	3.44895	3.20932	3.32913
IPE	5.1856	5.80528	5.49544	4.17184	5.78132	4.97658	3.12783	2.85498	2.99141
PYP	2.50736	2.70092	2.60414	2.97898	2.88568	2.93233	1.89767	2.51756	2.20761
PYQ	2.00885	1.29179	1.65032	2.06259	1.97344	2.01802	1.1572	0.760918	0.959061
IPH	1.75848	0.814806	1.28664	1.13841	1.16713	1.15277	1.08331	1.26435	1.17383
PYS	2.73017	2.71857	2.72437	2.74314	3.241	2.99207	1.90661	3.20021	2.55341
PYT	2.8139	1.53596	2.17493	1.76825	2.26534	2.0168	0.803223	0.778192	0.790708
IPL	4.04886	4.4746	4.26173	2.70083	3.6094	3.15511	2.10541	1.91738	2.0114
IPM	4.24498	5.3097	4.77734	3.70569	4.23898	3.97234	2.44569	1.96469	2.20519
IPR	4.78904	6.02777	5.40841	5.22613	5.68724	5.45669	3.23431	3.10026	3.16728
PYI	1.99046	2.43496	2.21271	2.42085	2.38972	2.40529	1.4544	1.95886	1.70663
IPP	3.70888	3.29774	3.50331	3.77898	3.68467	3.73183	2.21607	2.5461	2.38108
IPQ	4.39325	4.22887	4.31106	2.76631	3.75457	3.26044	2.69054	2.09773	2.39413
PYL	1.72459	1.04518	1.38489	1.58172	1.76705	1.67438	1.14671	1.32343	1.23507
PYN	2.46526	1.68354	2.0744	2.69956	2.8108	2.75518	1.27529	2.16613	1.72071
PYA	3.70788	2.97165	3.33977	3.4115	3.26678	3.33914	1.78822	2.73983	2.26402
IPY	4.30983	5.99528	5.15255	4.04659	4.57652	4.31156	2.97199	2.21254	2.59227
PYD	2.64884	2.44555	2.54719	2.01009	1.84292	1.92651	1.75377	1.56216	1.65796
PYE	3.23799	2.95321	3.0956	2.35442	4.02788	3.19115	3.16408	1.76513	2.4646
PYF	1.84282	1.54349	1.69315	1.40703	1.33713	1.37208	1.13289	0.841475	0.987183
PYG	3.08899	2.3112	2.7001	2.40419	2.78708	2.59563	1.08857	0.977337	1.03296
NGD	2.93162	2.79492	2.86327	2.52408	2.78676	2.65542	1.6737	1.3609	1.5173
HDV	3.31612	2.93778	3.12695	2.27739	2.32281	2.3001	16.9568	18.2323	17.5946
NGF	2.70036	2.19722	2.44879	2.08402	2.1276	2.10581	1.22266	1.1705	1.19658
NGG	5.57456	4.66253	5.11855	5.31189	5.44013	5.37601	2.8437	3.44583	3.14477
HDS	1.71677	2.54649	2.13163	2.24247	2.04822	2.14535	1.21449	1.16895	1.19172
NGA	2.22305	1.6266	1.92483	2.38843	2.35392	2.37117	1.61059	1.4035	1.50704
HDQ	2.5273	1.92637	2.22684	3.08337	2.33602	2.70969	2.19857	0.765936	1.48225
HDP	5.40244	4.17468	4.78856	5.11256	4.02959	4.57108	2.35016	3.46269	2.90643
NGL	2.32962	2.25564	2.29263	1.85981	2.21266	2.03624	1.60595	1.5756	1.59078
NGM	2.28526	2.71976	2.50251	2.21388	2.51204	2.36296	1.61952	2.03925	1.82938
NGN	1.57571	1.89076	1.73324	1.67116	1.66188	1.66652	1.221	0.815202	1.0181
NGH	0.903027	0.558301	0.730664	0.911338	1.33279	1.12207	0.827041	1.10887	0.967954
NGI	3.29781	3.26713	3.28247	2.51125	2.90342	2.70733	2.10564	2.17762	2.14163
HDY	4.32041	5.33093	4.82567	3.71884	3.90562	3.81223	2.21972	4.49891	3.35932
NGK	2.52402	2.39632	2.46017	2.72333	3.42609	3.07471	1.32889	1.35506	1.34197
NGT	2.02626	2.48198	2.25412	2.70325	1.93797	2.32061	1.19131	1.46392	1.32761
HDF	2.3294	1.60534	1.96737	2.61413	1.24437	1.92925	1.98017	0.784726	1.38245
NGV	3.53728	3.17225	3.35476	3.17887	3.24276	3.21082	23.3818	22.6228	23.0023
HDD	2.25501	1.41064	1.83283	1.97557	1.31528	1.64543	1.09857	0.560565	0.829567
NGP	3.36204	2.74128	3.05166	3.87371	3.89562	3.88466	1.68745	1.9007	1.79407
NGQ	2.06955	1.51437	1.79196	1.8802	1.158	1.5191	1.00484	1.02363	1.01423
HDA	3.6109	4.22947	3.92018	3.68649	2.20695	2.94672	1.12853	1.75172	1.44012
NGS	2.06615	1.70219	1.88417	2.36173	2.21455	2.28814	1.06081	0.952345	1.00658
HDN	2.15462	1.81917	1.98689	1.41438	1.7263	1.57034	1.57299	0.45159	1.01229
HDL	2.47193	2.42565	2.44879	2.30286	2.03795	2.17041	1.32966	2.32107	1.82537
HDK	2.50367	4.33001	3.41684	2.72347	2.62817	2.67582	1.35162	2.29293	1.82227
NGY	3.16887	3.96417	3.56652	3.34594	3.71514	3.53054	2.39456	2.04332	2.21894
HDI	2.09364	2.28053	2.18709	2.87232	2.26667	2.5695	1.3159	1.04874	1.18232
SHP	4.14401	4.60423	4.37412	4.65322	4.14355	4.39838	3.04576	2.15301	2.59939
SHQ	1.49129	1.31248	1.40189	1.51445	1.48566	1.50005	1.07917	1.5905	1.33484
SHR	2.45003	3.60837	3.0292	2.56595	2.80758	2.68676	1.78991	1.85079	1.82035
SHS	2.9107	3.35998	3.13534	2.74502	2.49521	2.62012	1.6692	1.94182	1.80551
SHT	2.65693	3.46044	3.05868	2.80829	2.60692	2.7076	1.26598	1.77415	1.52006
NNF	2.92693	2.69546	2.8112	1.96135	3.04128	2.50132	1.61697	1.45129	1.53413
SHV	3.28765	2.62499	2.95632	3.15169	2.1984	2.67505	17.4512	17.8227	17.6369
SHY	3.20077	4.88685	4.04381	3.83288	4.99195	4.41242	2.31885	1.94545	2.13215
SHA	3.18626	2.76704	2.97665	3.28058	2.20318	2.74188	2.05819	2.21745	2.13782
SHD	2.73704	3.92879	3.33291	2.74545	3.28339	3.01442	1.64367	1.92112	1.7824
SHE	4.65368	5.04304	4.84836	3.21311	5.22199	4.21755	2.49164	2.19726	2.34445
SHF	2.40088	3.26495	2.83291	3.57847	3.51724	3.54786	2.01198	1.38849	1.70023
SHG	4.86365	4.6792	4.77143	4.32217	5.06417	4.69317	2.54979	2.48486	2.51732
SHH	1.11042	0.351675	0.731048	1.37986	0.974643	1.17725	0.616372	0.942683	0.779527
SHI	2.29798	2.86128	2.57963	2.11157	2.75043	2.431	2.04923	1.21115	1.63019
SHK	3.59014	3.30535	3.44775	2.21348	2.74731	2.4804	1.50794	1.24568	1.37681
SHL	1.71949	1.32222	1.52085	1.80452	2.00217	1.90334	0.839058	0.934157	0.886608
SHN	1.62434	2.59157	2.10796	1.97327	2.11336	2.04331	1.37811	1.37504	1.37657
MGA	3.22955	3.50516	3.36736	3.2997	2.73298	3.01634	0.988807	1.39407	1.19144
MGG	3.67192	4.9363	4.30411	4.03579	3.95219	3.99399	1.6463	1.93252	1.78941
MGF	2.97007	3.23178	3.10093	2.21654	3.08992	2.65323	1.48058	1.75446	1.61752
MGE	4.09608	5.70582	4.90095	5.38402	5.20229	5.29316	2.16968	2.20657	2.18812
MGD	1.62333	4.53379	3.07856	2.39957	3.51548	2.95752	2.13498	1.17669	1.65583
MGK	3.8599	3.77308	3.81649	3.88399	3.60727	3.74563	2.80373	1.86398	2.33386
MGI	2.64817	4.10446	3.37632	2.90243	3.98051	3.44147	1.72264	2.17385	1.94825
MGN	2.98523	1.87803	2.43163	2.20419	1.67969	1.94194	0.936681	1.28355	1.11012
MGL	2.88108	3.03963	2.96036	2.26735	3.51213	2.88974	1.53893	1.90898	1.72396
MGS	2.07014	2.62217	2.34616	2.41215	2.61299	2.51257	1.12133	1.3622	1.24177
MGR	4.3754	5.15151	4.76345	3.57796	4.45601	4.01699	5.09215	2.50394	3.79805
MGQ	2.95866	3.86976	3.41421	2.43	2.44367	2.43684	1.34719	1.15909	1.25314
MGP	4.13916	2.87193	3.50554	3.07009	2.68225	2.87617	1.61244	1.8342	1.72332
MGV	4.21034	5.23473	4.72253	4.70105	4.08118	4.39112	23.5151	24.0491	23.7821
MGY	4.91512	3.75008	4.3326	2.55275	3.82397	3.18836	2.3473	2.15145	2.24938
ECL	3.39817	3.56394	3.48106	2.51597	4.06406	3.29001	1.45955	1.84283	1.65119
ECK	3.13584	3.98115	3.5585	3.80483	2.99075	3.39779	1.99353	1.51108	1.7523
ECI	2.16275	3.73702	2.94989	3.24781	3.4194	3.33361	1.07474	1.46757	1.27115
ECV	2.28049	3.7532	3.01684	2.59037	2.22204	2.40621	23.0444	23.1129	23.0787
ECT	2.28119	2.41427	2.34773	2.30228	2.77323	2.53776	1.182	1.69031	1.43616
LNI	3.78626	4.0979	3.94208	3.6967	4.30241	3.99955	2.35253	2.00059	2.17656
QFY	3.35106	3.81622	3.58364	2.80415	3.89367	3.34891	2.5623	1.69271	2.12751
QFT	1.46269	1.40399	1.43334	1.74339	1.37312	1.55826	1.06032	0.748749	0.904536
QFV	1.86069	2.15636	2.00852	2.16291	2.43243	2.29767	21.6137	19.5741	20.5939
QFP	3.40555	3.04045	3.223	3.01128	4.71798	3.86463	3.7775	3.10543	3.44147
QFQ	1.2359	1.70711	1.47151	1.0257	2.68207	1.85388	0.674984	0.781004	0.727994
QFR	3.59658	4.54196	4.06927	4.49942	3.64797	4.07369	2.80491	2.17029	2.4876
QFS	2.27843	2.24618	2.2623	2.58677	2.06545	2.32611	1.07091	1.68071	1.37581
QFL	1.73212	1.92949	1.8308	1.16966	2.02798	1.59882	1.12802	1.43918	1.2836
QFN	1.18287	1.15863	1.17075	1.27911	1.49501	1.38706	0.9366	1.62225	1.27943
QFH	0.9986	0.437962	0.718281	0.575622	1.13061	0.853116	0.73363	0.979892	0.856761
QFI	2.27873	2.3594	2.31907	2.73087	2.49072	2.61079	1.92847	1.76333	1.8459
LND	3.76979	3.32102	3.54541	3.06426	3.07609	3.07017	1.93485	2.19562	2.06523
QFD	1.89549	1.28768	1.59159	1.57835	1.31766	1.448	0.895951	0.816241	0.856096
QFE	2.09741	2.66093	2.37917	2.68077	4.17397	3.42737	2.07949	0.830156	1.45482
QFF	3.9377	1.9382	2.93795	1.99967	2.16344	2.08155	0.956116	1.71894	1.33753
QFG	3.13269	3.52535	3.32902	2.96753	3.63201	3.29977	1.88858	2.18066	2.03462
QFA	2.44424	1.73938	2.09181	2.63937	2.47336	2.55637	1.81539	2.88563	2.35051
KEN	1.34632	1.54644	1.44638	1.60985	1.4615	1.53568	0.862588	0.948988	0.905788
KEM	1.27838	1.56737	1.42288	1.57084	1.59584	1.58334	1.35561	1.10514	1.23038
RMI	3.76243	2.15475	2.95859	1.55329	2.56195	2.05762	2.2346	0.980307	1.60745
KEK	4.2324	4.34226	4.28733	4.20173	4.21257	4.20715	2.49926	2.71651	2.60788
KEI	2.05989	2.51361	2.28675	2.44712	2.02428	2.2357	1.46374	1.3652	1.41447
KEH	0.94305	0.673869	0.80846	0.926355	1.13034	1.02835	0.517437	0.535227	0.526332
KEG	2.40153	2.96725	2.68439	2.1964	2.41658	2.30649	1.7335	1.58981	1.66166
KEF	1.96419	2.02256	1.99338	1.97847	1.71247	1.84547	1.27214	1.05689	1.16451
KEE	1.97834	1.92369	1.95102	2.16427	2.458	2.31113	1.4739	1.5586	1.51625
KED	1.79975	1.60419	1.70197	1.32331	1.73472	1.52902	0.991511	0.885144	0.938328
KEC	2.16818	2.44735	2.30777	3.46916	2.5366	3.00288	1.97431	1.67463	1.82447
KEA	2.39719	2.40207	2.39963	2.25121	2.41543	2.33332	1.73702	1.76373	1.75038
LNC	4.66718	4.30049	4.48383	4.36817	4.20488	4.28653	2.84466	2.21181	2.52824
KEY	2.03756	2.75171	2.39463	2.70497	2.78432	2.74464	1.75558	1.56137	1.65847
KEW	2.32371	2.78256	2.55313	2.37467	2.58823	2.48145	2.42303	1.96872	2.19587
KEV	2.35617	2.98823	2.6722	2.66398	2.75272	2.70835	22.4008	21.9508	22.1758
KET	1.62738	1.29111	1.45924	1.77494	1.5781	1.67652	0.954713	0.855149	0.904931
KES	1.38117	1.85066	1.61591	1.73849	2.0504	1.89444	0.85303	1.24518	1.0491
KER	4.58257	3.2393	3.91093	4.28435	4.25769	4.27102	2.83969	2.32685	2.58327
KEQ	1.75084	1.32996	1.5404	1.46662	1.52759	1.4971	0.932395	1.11918	1.02579
KEP	4.7614	4.38138	4.57139	5.09942	5.59523	5.34732	2.59261	2.50705	2.54983
AAV	2.90144	3.24899	3.07521	2.84198	2.79027	2.81612	18.3855	19.075	18.7302
KQT	2.67543	2.49862	2.58702	1.96667	3.85118	2.90893	1.52848	1.90673	1.71761
EPT	4.608	5.46634	5.03717	4.17646	6.07956	5.12801	2.37303	2.33002	2.35153
KQA	3.8502	4.19747	4.02384	2.87665	4.65284	3.76474	1.77794	1.2757	1.52682
EPK	4.59115	5.59687	5.09401	5.39957	5.27486	5.33721	2.68988	2.75611	2.72299
EPH	1.85313	1.41866	1.63589	2.19308	2.49621	2.34464	2.16778	1.27848	1.72313
KQD	2.74451	2.41278	2.57864	2.03641	2.18461	2.11051	1.66819	1.07534	1.37176
EPF	4.47112	4.58239	4.52676	3.69653	5.5925	4.64452	2.75138	2.67886	2.71512
KQI	2.23373	3.55798	2.89586	3.13516	3.26159	3.19838	2.57003	1.62063	2.09533
KQH	1.84085	1.2651	1.55297	1.33527	1.08385	1.20956	0.959265	1.45174	1.2055
EPA	4.54919	4.38378	4.46649	3.74577	4.83097	4.28837	3.45575	1.88803	2.67189
YYT	1.67362	1.33854	1.50608	1.01891	1.04955	1.03423	1.0109	0.942745	0.976823
YYV	2.01132	1.32233	1.66683	1.59648	2.2947	1.94559	14.151	12.6649	13.408
YYQ	1.94107	1.57123	1.75615	1.46396	1.25873	1.36134	1.30906	0.848273	1.07867
YYP	2.18643	2.31588	2.25116	2.36618	1.99145	2.17882	1.89552	1.16335	1.52944
YYS	2.47283	1.46381	1.96832	2.35897	1.57898	1.96898	1.36006	0.840411	1.10023
YYR	2.34179	2.03588	2.18884	2.39492	2.18335	2.28913	2.02873	1.3295	1.67912
YYY	3.3455	3.32882	3.33716	2.35917	2.89892	2.62904	1.71695	1.579	1.64798
YYE	1.78203	2.30121	2.04162	2.4863	2.40774	2.44702	1.17732	0.918183	1.04775
YYD	1.41656	1.02559	1.22107	1.45797	1.01651	1.23724	0.672641	0.877523	0.775082
YYG	3.07636	2.50796	2.79216	2.02652	2.39556	2.21104	1.74106	1.16931	1.45518
YYF	1.68339	1.16606	1.42473	1.2989	1.17824	1.23857	0.686053	0.451536	0.568794
YYA	3.04472	3.05106	3.04789	1.66928	2.00813	1.8387	1.62814	0.914831	1.27148
YYL	1.11916	0.968826	1.04399	0.911828	1.12793	1.01988	1.14881	0.70354	0.926173
YYN	0.929485	1.00096	0.96522	1.30742	1.31427	1.31084	0.720245	0.783706	0.751976
YYI	1.22766	1.55398	1.39082	1.86305	1.08912	1.47609	1.5705	1.23544	1.40297
YYH	0.745398	0.452588	0.598993	0.766186	1.44249	1.10434	0.493084	0.159512	0.326298
YYK	1.32166	1.42076	1.37121	3.28381	2.25735	2.77058	1.38663	1.0305	1.20856
WSA	2.36833	1.59052	1.97942	3.11653	2.09795	2.60724	1.61446	1.16931	1.39189
HYA	1.47346	1.72524	1.59935	2.04606	1.4942	1.77013	2.33046	1.05356	1.69201
HYD	1.33768	0.691747	1.01471	1.24634	0.723148	0.984745	0.462213	0.536125	0.499169
WSD	1.40392	3.88803	2.64598	2.68842	1.63335	2.16088	1.50047	1.36297	1.43172
HYG	1.80552	1.93441	1.86997	2.37575	2.05178	2.21377	1.47902	1.00455	1.24178
WSI	2.00316	2.14687	2.07502	3.79725	2.36033	3.07879	1.2733	1.2634	1.26835
HYI	1.14217	4.2815	2.71184	1.82567	2.01342	1.91954	0.986808	1.64993	1.31837
WSK	4.36029	4.54598	4.45314	3.50672	2.57914	3.04293	3.74402	1.58017	2.66209
HYK	2.11331	2.87539	2.49435	2.24682	1.84595	2.04638	1.09684	1.54252	1.31968
HYL	1.73755	1.50919	1.62337	1.29818	2.30593	1.80205	0.571361	1.16448	0.867922
WSL	1.7307	1.76678	1.74874	2.04029	2.01428	2.02729	1.07029	1.23092	1.1506
HYN	0.996006	1.39941	1.19771	1.27472	1.4966	1.38566	0.571714	0.874418	0.723066
WSN	2.16196	2.34003	2.25099	2.53242	1.44685	1.98963	1.23099	2.36543	1.79821
WSS	1.82824	3.04673	2.43749	2.54198	2.68368	2.61283	1.05487	1.23957	1.14722
HYS	1.41568	1.83885	1.62726	1.75194	1.30547	1.52871	1.0177	1.62192	1.31981
HYT	2.18267	3.0099	2.59628	1.45063	1.64171	1.54617	0.812135	1.0138	0.912969
WST	1.66244	2.92361	2.29302	2.59937	2.54564	2.5725	0.497194	1.85416	1.17568
HYV	1.98836	1.44344	1.7159	1.68971	1.89336	1.79154	16.6973	16.5726	16.635
WSV	3.98988	2.54873	3.2693	3.57874	1.85789	2.71831	19.9745	19.081	19.5277
VKY	2.89966	2.895	2.89733	2.61828	2.78381	2.70104	1.61513	2.05921	1.83717
VKP	2.2001	2.43435	2.31722	2.89494	2.67757	2.78625	1.14181	1.63992	1.39087
VKQ	1.56877	0.904329	1.23655	0.935324	0.953618	0.944471	0.785289	0.499631	0.64246
VKR	1.91065	1.91552	1.91309	1.85204	1.63404	1.74304	1.02793	1.12968	1.0788
VKS	1.61937	1.7191	1.66923	1.76701	1.66471	1.71586	0.709935	0.88702	0.798477
VKT	1.38597	0.991815	1.18889	1.27975	1.51596	1.39786	0.487175	0.645178	0.566176
VKV	1.69033	1.43274	1.56153	2.24877	1.92226	2.08551	9.32955	10.6166	9.97308
VKW	1.95298	2.54514	2.24906	2.67414	2.46995	2.57204	1.01723	1.19769	1.10746
VKH	0.945881	0.356805	0.651343	0.689192	0.60185	0.645521	0.388512	0.155966	0.272239
VKI	1.75938	1.45539	1.60739	1.68273	1.41969	1.55121	0.713157	0.890188	0.801673
VKK	2.06062	1.45218	1.7564	1.86512	1.63243	1.74878	0.748782	0.85923	0.804006
VKL	1.41085	1.53755	1.4742	1.51479	1.59353	1.55416	0.776712	0.634238	0.705475
VKM	2.10826	1.16098	1.63462	0.902916	1.13124	1.01708	0.728714	0.472699	0.600706
VKN	1.30498	1.30604	1.30551	1.88936	1.62996	1.75966	0.896458	0.694368	0.795413
VKA	2.10849	2.38539	2.24694	1.93554	1.76533	1.85043	1.07841	1.22642	1.15242
VKC	1.8251	1.62727	1.72619	1.17177	1.7503	1.46104	0.724134	0.551141	0.637638
VKD	2.34964	2.38474	2.36719	1.9678	2.12602	2.04691	1.29059	1.21427	1.25243
VKE	4.02212	4.73871	4.38042	3.56343	4.74661	4.15502	1.97335	2.15749	2.06542
VKF	1.93152	1.87586	1.90369	1.83436	1.94011	1.88724	0.718794	1.41267	1.06573
VKG	3.16181	3.42452	3.29316	3.173	4.0128	3.5929	1.84012	1.57163	1.70588
FWL	0.71433	0.914648	0.814489	1.06738	1.02743	1.0474	0.391871	0.502691	0.447281
FWK	2.08914	2.15864	2.12389	2.73552	2.56195	2.64874	1.49039	1.20118	1.34579
FWS	1.79158	1.98599	1.88878	1.10571	1.50292	1.30432	0.744513	1.48861	1.11656
NHA	1.59225	2.56934	2.0808	4.82655	1.58787	3.20721	1.14717	1.13829	1.14273
RQV	4.14285	4.7641	4.45348	4.07348	3.26321	3.66835	22.2005	20.8853	21.5429
RQT	1.61619	1.96036	1.78828	2.06038	1.37329	1.71684	1.27649	1.87603	1.57626
RQR	5.01256	4.26311	4.63783	4.36147	4.91185	4.63666	3.45336	2.76746	3.11041
RQS	2.51322	2.94528	2.72925	2.8915	2.42342	2.65746	1.97571	2.12392	2.04982
RQP	5.66766	5.70336	5.68551	4.98493	4.71235	4.84864	3.34297	2.92755	3.13526
RQQ	2.33704	2.78262	2.55983	2.44039	2.49001	2.4652	1.40916	1.55378	1.48147
RQY	4.63296	4.55893	4.59595	3.52237	5.63585	4.57911	2.96262	2.6187	2.79066
RQF	5.70908	4.12895	4.91901	3.89276	4.42747	4.16011	2.55034	2.52056	2.53545
RQG	4.60338	4.4852	4.54429	4.88304	3.72141	4.30223	2.04338	3.28612	2.66475
RQD	3.07162	4.52805	3.79984	2.05436	3.65799	2.85618	2.35833	2.88366	2.62099
RQE	3.27532	4.79474	4.03503	4.19153	4.02814	4.10983	2.53252	3.03422	2.78337
RQA	3.36902	3.3065	3.33776	2.89216	2.91776	2.90496	1.54322	1.79305	1.66813
RQN	2.18681	3.65252	2.91967	2.5818	2.29269	2.43724	1.5928	0.762869	1.17784
RQL	2.86347	2.18311	2.52329	1.71931	2.33209	2.0257	1.24464	1.3914	1.31802
RQM	4.59986	4.284	4.44193	2.34828	2.58385	2.46607	1.35816	1.42954	1.39385
RQK	8.12575	8.31473	8.22024	7.38641	8.10185	7.74413	5.71932	5.10135	5.41034
RQH	1.26423	1.69256	1.4784	1.19555	1.23015	1.21285	0.250411	0.858507	0.554459
RQI	4.11977	3.63232	3.87605	4.11981	3.47316	3.79648	2.2911	1.93548	2.11329
DEY	3.8617	4.16685	4.01427	3.44871	4.94274	4.19572	2.22619	3.09076	2.65848
DEP	5.74796	4.66422	5.20609	4.78561	4.95394	4.86977	2.58334	3.5453	3.06432
DEQ	2.44163	1.49021	1.96592	1.94375	1.79743	1.87059	1.15133	1.43341	1.29237
DER	3.80852	4.10218	3.95535	3.90323	3.97024	3.93673	2.89683	2.77906	2.83795
DES	1.8622	1.8932	1.8777	2.31514	1.76212	2.03863	1.32906	1.55047	1.43977
DET	1.94983	1.50409	1.72696	1.50456	1.86646	1.68551	1.09613	1.59076	1.34345
DEV	2.16228	2.34854	2.25541	2.68515	2.44608	2.56562	18.144	19.0533	18.5987
DEH	1.34647	0.796884	1.07168	0.869511	0.999501	0.934506	0.616773	0.825211	0.720992
DEI	2.15969	2.57764	2.36867	2.50012	2.09256	2.29634	1.45622	1.61931	1.53777
DEK	2.32494	2.24012	2.28253	2.3001	2.81625	2.55817	1.55244	1.7109	1.63167
DEL	1.7888	1.65161	1.72021	1.96509	2.08966	2.02738	1.52233	1.56014	1.54124
DEM	2.25851	2.09927	2.17889	2.14911	2.57987	2.36449	1.62707	1.97289	1.79998
DEN	1.2795	1.48911	1.38431	1.4579	1.41527	1.43658	0.881662	1.11921	1.00043
DEA	3.09671	3.36218	3.22945	3.00889	2.63411	2.8215	2.12001	1.90328	2.01165
DEC	1.56604	2.2074	1.88672	2.68415	1.59957	2.14186	0.728528	1.58461	1.15657
DED	1.42043	1.34572	1.38308	1.47874	1.46264	1.47069	1.08448	1.0113	1.04789
DEE	2.83881	2.72722	2.78301	2.28442	2.86601	2.57522	1.9102	1.78671	1.84846
DEF	2.40849	2.81385	2.61117	2.28612	2.27121	2.27867	1.71457	1.84168	1.77813
DEG	3.68339	3.05054	3.36696	3.46578	3.45656	3.46117	2.43603	2.48691	2.46147
GGT	7.59996	5.8679	6.73393	8.91407	6.93313	7.9236	4.27387	4.76826	4.52106
FKE	4.30398	4.23912	4.27155	3.48724	4.32507	3.90615	1.95264	1.9694	1.96102
MDI	3.8464	3.41186	3.62913	2.58918	3.54452	3.06685	1.15013	1.07245	1.11129
TGC	3.43222	2.00077	2.7165	4.44668	3.8941	4.17039	1.35366	1.81143	1.58254
GGQ	2.3029	2.9612	2.63205	2.54245	3.22189	2.88217	1.65601	2.37072	2.01337
IVD	1.18034	1.12961	1.15497	1.3605	0.956487	1.15849	1.30438	2.03536	1.66987
IVE	3.01678	2.1089	2.56284	2.07424	2.03278	2.05351	3.67579	3.94881	3.8123
IVF	2.39591	2.737	2.56646	2.2637	2.2164	2.24005	4.15864	6.46545	5.31205
IVG	3.59501	2.49041	3.04271	3.03903	2.37466	2.70685	5.30283	5.37982	5.34132
IVA	1.7239	2.03029	1.87709	2.02976	1.86278	1.94627	3.98065	4.90954	4.4451
IVC	1.0736	1.05719	1.06539	0.878206	0.908622	0.893414	2.34088	2.42246	2.38167
IVL	1.07854	0.965229	1.02188	1.03146	1.43252	1.23199	1.75396	2.03669	1.89533
IVM	1.29322	1.45818	1.3757	1.87477	1.65868	1.76673	2.63157	3.34868	2.99013
IVN	1.1523	1.33829	1.24529	1.21455	1.10531	1.15993	1.88201	2.51724	2.19963
IVH	0.663869	0.518077	0.590973	0.758428	1.5203	1.13936	0.663273	0.919687	0.79148
IVI	1.59909	1.57751	1.5883	2.17695	1.70788	1.94241	3.70701	4.32605	4.01653
IVK	1.27527	1.18411	1.22969	2.08977	1.41304	1.7514	2.45299	2.94669	2.69984
IVT	1.24853	1.4885	1.36851	1.43006	1.55257	1.49132	2.038	2.43182	2.23491
IVV	1.93897	1.81205	1.87551	1.37194	1.49908	1.43551	11.5173	13.5956	12.5564
IVP	3.73474	2.68297	3.20886	3.15621	3.25362	3.20492	3.88549	4.43012	4.1578
IVQ	0.927231	1.32193	1.12458	1.90242	0.913985	1.4082	1.78641	1.96482	1.87562
IVR	1.47258	1.69618	1.58438	1.80702	1.44459	1.6258	2.49508	2.99041	2.74275
IVS	1.47952	1.48531	1.48241	1.5975	1.88328	1.74039	2.81555	3.57053	3.19304
IVY	3.11184	3.25992	3.18588	2.54438	2.10386	2.32412	4.6251	4.8162	4.72065
NEN	1.36563	1.20728	1.28645	1.52817	1.33828	1.43322	0.986227	0.891265	0.938746
NEL	1.55461	1.57708	1.56584	1.33339	1.83648	1.58493	1.18727	1.03079	1.10903
NEM	1.60334	2.44985	2.02659	1.35817	1.60372	1.48095	0.944631	0.950248	0.94744
ACG	5.24328	4.68584	4.96456	5.06442	6.00322	5.53382	1.97552	1.7553	1.86541
NEK	1.54857	1.41103	1.4798	2.01203	1.49143	1.75173	1.1341	1.34072	1.23741
ACE	4.10738	4.77814	4.44276	3.20511	4.38167	3.79339	3.69524	2.30207	2.99865
ACD	3.5198	3.04391	3.28186	3.68431	2.49253	3.08842	0.83808	1.04648	0.942278
NEF	1.3485	1.54119	1.44485	1.56442	1.78999	1.6772	0.734478	1.45123	1.09285
NEG	3.32961	2.61609	2.97285	2.68683	2.40921	2.54802	1.86733	1.72525	1.79629
NED	1.32864	1.24552	1.28708	1.31678	1.54802	1.4324	1.17301	0.888805	1.03091
HFR	3.45094	2.29845	2.87469	4.31729	3.79298	4.05514	2.51655	1.83941	2.17798
HFT	0.868706	2.42316	1.64593	1.38182	1.67327	1.52754	1.08738	0.647108	0.867246
NEA	2.38171	1.83724	2.10948	2.39291	2.07208	2.23249	1.41578	1.35669	1.38624
ACS	3.87266	4.07537	3.97402	3.79557	3.16334	3.47946	1.68969	1.49048	1.59008
HFK	2.95057	2.60213	2.77635	2.2452	2.35027	2.29774	1.2018	1.92039	1.56109
HFL	1.06511	1.71292	1.38902	1.39078	1.69076	1.54077	0.574465	1.27259	0.923526
ACT	2.2654	3.49127	2.87834	2.46611	2.56955	2.51783	0.936714	1.82232	1.37952
HFA	1.30372	1.87357	1.58865	2.61334	2.89528	2.75431	0.909609	1.54854	1.22907
NEW	2.34351	2.16421	2.25386	2.09952	2.9259	2.51271	2.21222	2.13113	2.17168
NET	1.54412	1.40741	1.47576	1.17937	1.68316	1.43127	1.12078	1.20513	1.16295
NER	2.63768	2.44544	2.54156	2.54049	2.42627	2.48338	2.03807	1.86967	1.95387
NES	1.46569	1.02357	1.24463	1.67502	1.60202	1.63852	0.996486	1.06371	1.0301
NEP	3.60695	3.14077	3.37386	3.32986	3.40221	3.36603	2.77538	1.56734	2.17136
HFF	1.60183	2.03224	1.81703	1.79475	1.89536	1.84506	0.803082	0.720777	0.761929
MDY	4.51957	5.47512	4.99734	3.70736	6.51125	5.1093	3.68238	1.96382	2.8231
MDR	3.75956	3.87015	3.81485	3.47527	4.05454	3.76491	4.21649	3.73053	3.97351
GGL	2.0617	2.11358	2.08764	2.1049	2.70266	2.40378	1.46936	1.30747	1.38842
MEE	2.83316	3.92523	3.3792	4.20895	3.19391	3.70143	1.65554	1.85691	1.75623
GDQ	4.42722	3.02795	3.72759	3.97917	3.19448	3.58683	2.5681	0.888661	1.72838
MEG	5.37358	3.60876	4.49117	3.03561	1.86919	2.4524	1.8295	1.12392	1.47671
GDS	2.70198	2.32495	2.51346	2.80855	2.82277	2.81566	1.64503	1.53473	1.58988
GDT	6.84322	5.86398	6.3536	6.1294	5.86101	5.9952	3.97259	3.43427	3.70343
GDV	2.91335	2.98882	2.95108	3.44862	3.54145	3.49504	20.7033	22.7108	21.7071
MEL	1.65451	2.67496	2.16473	1.94487	2.90218	2.42352	1.66327	2.03418	1.84873
MEN	1.94078	2.20495	2.07286	2.37153	2.90042	2.63598	1.28029	1.37762	1.32896
MEI	2.95063	3.60126	3.27595	2.91581	3.08761	3.00171	2.01253	1.5238	1.76817
MEK	2.88485	4.51863	3.70174	3.21738	3.92572	3.57155	2.17256	1.52053	1.84655
GGH	1.25011	0.470672	0.860391	0.880745	0.744981	0.812863	1.31545	0.396584	0.856015
MET	1.90033	1.56044	1.73039	2.56996	2.43365	2.50181	0.449962	1.08856	0.769264
MEV	3.05898	3.88675	3.47286	2.49328	2.52739	2.51033	19.0956	19.5879	19.3417
MEQ	1.94607	1.66807	1.80707	2.03087	1.51321	1.77204	0.978414	1.18964	1.08403
GDE	2.82562	3.2018	3.01371	3.47184	3.68059	3.57622	1.74498	1.61532	1.68015
GDF	2.01159	1.82852	1.92006	2.23833	2.63389	2.43611	1.06063	1.14098	1.1008
GDG	9.14314	7.57839	8.36076	6.18796	8.12987	7.15892	4.59809	3.06226	3.83018
GDH	1.73709	0.510627	1.12386	0.764967	0.846622	0.805795	0.646346	0.515518	0.580932
GDI	3.5349	2.73517	3.13504	2.56882	3.21352	2.89117	1.78099	2.10518	1.94308
GDK	2.61278	2.98521	2.79899	3.29324	3.44704	3.37014	1.38659	1.66759	1.52709
GDL	2.62351	2.34681	2.48516	2.59347	2.43806	2.51577	1.71378	1.47204	1.59291
GDM	2.59862	2.46746	2.53304	4.44774	2.94821	3.69797	1.33193	1.29177	1.31185
GDN	2.44526	1.56878	2.00702	1.8129	1.9591	1.886	1.34798	1.30539	1.32669
LWR	3.403	3.17682	3.28991	4.59037	3.63221	4.11129	2.60921	2.38575	2.49748
LWS	3.4136	2.62984	3.02172	2.30421	3.29982	2.80202	1.35585	2.70085	2.02835
LWV	2.44783	2.10124	2.27454	3.6123	2.88491	3.24861	14.1216	15.8619	14.9917
LWT	2.09064	2.1932	2.14192	1.88693	2.53667	2.2118	0.675025	1.46276	1.06889
WKD	2.17583	3.53415	2.85499	3.62326	3.24643	3.43484	1.82026	1.99012	1.90519
LWK	3.74884	2.59637	3.1726	3.95388	3.05368	3.50378	1.5844	2.77408	2.17924
LWI	2.54776	2.59002	2.56889	2.6579	2.04803	2.35297	0.44784	1.59673	1.02229
LWN	1.58033	2.34362	1.96197	1.92117	1.2423	1.58174	0.834053	1.01355	0.923802
LWL	2.5432	2.47043	2.50681	2.36208	2.23276	2.29742	1.4344	1.36355	1.39898
LWA	2.91946	2.66187	2.79066	3.31197	3.33565	3.32381	1.81708	2.0614	1.93924
LWF	4.43525	5.09909	4.76717	3.97137	4.2668	4.11909	3.16366	3.12698	3.14532
LWG	2.17638	2.38933	2.28286	3.05829	3.73404	3.39616	1.20144	0.776981	0.989213
LWD	1.36147	2.55253	1.957	1.59079	1.72758	1.65918	1.74729	1.9785	1.8629
LWE	3.3275	5.68927	4.50839	2.99006	3.76216	3.37611	1.6456	1.53364	1.58962
QVM	3.11966	1.58435	2.352	2.40004	2.47578	2.43791	1.08365	1.74573	1.41469
QDF	1.66472	2.18002	1.92237	2.08012	2.34862	2.21437	1.18222	0.980694	1.08146
QDG	3.85113	4.78104	4.31608	4.26565	3.81774	4.04169	2.48169	2.56397	2.52283
KGS	2.17474	1.90299	2.03886	1.94921	1.971	1.9601	1.29801	1.42239	1.3602
KGR	4.37763	3.6849	4.03127	3.17006	4.16779	3.66893	2.62457	2.51249	2.56853
KGT	1.84777	2.20118	2.02448	2.15539	2.22379	2.18959	1.22795	1.07074	1.14934
KGV	2.30098	2.50041	2.4007	3.54199	2.78532	3.16365	19.5462	21.3469	20.4466
QDN	2.79591	1.59266	2.19429	1.80654	1.70302	1.75478	0.856781	1.07842	0.967599
QDL	2.8946	2.69653	2.79556	2.83441	2.7526	2.7935	1.79465	1.74216	1.7684
QDM	2.68104	3.25121	2.96612	2.29782	3.3483	2.82306	3.11867	1.14503	2.13185
QDK	2.94204	3.56684	3.25444	2.86495	2.85529	2.86012	1.67714	1.51989	1.59851
QDH	2.53478	0.763416	1.6491	1.36108	1.59378	1.47743	1.19538	2.0446	1.61999
QDI	3.17466	2.98609	3.08038	3.17604	3.45811	3.31707	1.76487	1.7954	1.78013
QDV	3.32784	2.96198	3.14491	3.292	2.74002	3.01601	22.1301	21.4352	21.7827
QDT	1.58486	1.55267	1.56876	2.02893	1.82909	1.92901	1.94569	1.10288	1.52429
QDR	3.65873	3.64242	3.65058	3.44485	4.68822	4.06653	3.24956	3.46198	3.35577
QDS	2.36846	2.49331	2.43089	2.49075	2.1287	2.30972	2.11742	0.967637	1.54253
QDP	5.49681	3.89618	4.69649	4.13379	4.03206	4.08292	3.29836	2.28724	2.7928
KGF	2.01975	1.66288	1.84132	2.83563	1.71543	2.27553	0.933277	1.07505	1.00416
KGI	3.01541	3.0195	3.01745	3.15672	3.15773	3.15723	2.38316	2.02717	2.20517
KGH	0.517429	0.70616	0.611794	0.697474	1.17797	0.937723	0.669944	0.182212	0.426078
KGK	2.77351	2.62127	2.69739	2.87239	3.04279	2.95759	1.58715	1.4879	1.53752
WKV	1.87186	2.75456	2.31321	1.75235	2.31918	2.03576	14.6387	18.0351	16.3369
KGM	2.60012	1.83172	2.21592	1.78323	2.21626	1.99975	1.23686	1.15232	1.19459
KGL	1.87319	2.08287	1.97803	2.00278	2.10772	2.05525	1.13742	0.943788	1.0406
KGN	1.455	1.61274	1.53387	1.35757	1.31068	1.33412	1.19469	1.4116	1.30314
CPI	5.29126	3.34827	4.31977	2.13204	1.85243	1.99223	1.45063	2.4676	1.95912
CPL	3.01753	2.6731	2.84531	1.95834	3.20286	2.5806	2.01941	0.907966	1.46369
CPE	6.05941	3.36758	4.7135	3.45531	5.38871	4.42201	3.21494	2.44156	2.82825
CPS	5.10572	5.33632	5.22102	3.69196	3.5707	3.63133	1.94503	2.36329	2.15416
CPV	4.21095	3.19924	3.70509	3.43093	5.57892	4.50493	26.9444	23.2697	25.107
GVK	2.67999	2.61651	2.64825	2.51106	2.21307	2.36207	1.87312	2.25535	2.06423
ACL	3.12772	3.62655	3.37714	3.54564	3.21576	3.3807	1.59116	2.17254	1.88185
MQG	4.42015	6.50479	5.46247	3.81825	5.33963	4.57894	2.5913	2.39381	2.49256
MQS	3.63904	4.37966	4.00935	3.53592	3.88947	3.7127	1.84156	3.61799	2.72978
MQR	6.03549	6.31018	6.17284	4.4301	4.37977	4.40493	2.98848	4.39478	3.69163
ACV	2.92379	4.62096	3.77238	3.84601	3.87925	3.86263	25.0361	23.4302	24.2332
HTF	4.07856	4.24643	4.16249	3.7508	3.79698	3.77389	2.21395	1.27374	1.74385
HTT	3.50032	3.46469	3.48251	3.23133	3.63986	3.4356	3.30694	1.30946	2.3082
QKK	1.9202	2.65792	2.28906	2.44918	2.39648	2.42283	2.18682	1.63487	1.91084
QKI	1.74052	1.58651	1.66351	1.88339	1.63757	1.76048	1.10091	1.56281	1.33186
QKN	1.37541	1.86019	1.6178	1.26213	1.61542	1.43877	0.809743	0.679882	0.744813
KFP	6.16309	4.22714	5.19512	5.32859	5.35244	5.34052	3.04124	2.66751	2.85437
DQE	4.40663	5.57348	4.99005	4.03805	4.09607	4.06706	3.19192	1.52334	2.35763
KFQ	2.4788	1.11837	1.79859	1.51896	2.76588	2.14242	0.785046	1.28069	1.03287
QKD	1.91845	2.85694	2.38769	2.04565	2.11159	2.07862	1.44239	1.3196	1.38099
QKY	2.7129	2.89794	2.80542	2.01185	2.90765	2.45975	2.08679	1.25301	1.6699
DQI	3.89152	3.58554	3.73853	2.98827	2.83564	2.91196	2.37656	2.6915	2.53403
QKS	2.40189	2.65489	2.52839	2.4952	3.14122	2.81821	1.24137	1.32262	1.28199
KFL	1.60783	1.67173	1.63978	1.23553	1.76152	1.49853	0.852492	1.239	1.04575
RLD	1.79443	2.10178	1.94811	1.79059	2.37356	2.08208	1.34224	1.03983	1.19103
TYL	1.38521	1.43938	1.4123	1.46308	1.80811	1.6356	1.19414	1.21916	1.20665
VIC	1.91301	1.59937	1.75619	1.73798	1.39022	1.5641	0.578306	0.607612	0.592959
TYN	1.52086	1.3052	1.41303	1.34545	1.93784	1.64165	0.892077	0.879643	0.88586
VIA	0.752497	0.822606	0.787551	1.35135	0.731754	1.04155	0.633429	0.641834	0.637631
VIF	1.04717	1.37424	1.21071	1.30273	1.4768	1.38977	0.769718	1.20881	0.989262
TYI	2.74952	2.80084	2.77518	2.36121	2.44404	2.40263	1.16245	2.51334	1.8379
VID	0.716323	0.439421	0.577872	0.635899	0.738998	0.687449	0.375199	0.289625	0.332412
TYK	1.60107	1.33128	1.46617	1.74309	1.69447	1.71878	0.843152	1.06376	0.953458
TYD	2.16724	1.43404	1.80064	1.29149	1.52495	1.40822	0.900449	1.07704	0.988743
TYE	2.77532	3.52092	3.14812	2.62564	3.43892	3.03228	2.45468	1.56283	2.00876
VIH	0.664051	0.845615	0.754833	0.860485	0.658349	0.759417	0.354738	0.489589	0.422163
VII	1.46146	1.12861	1.29504	1.18151	1.04838	1.11494	0.704928	0.676574	0.690751
VIN	0.822346	0.287954	0.55515	0.689407	0.769336	0.729372	0.344335	0.351461	0.347898
TYA	2.53806	2.11032	2.32419	2.76456	2.14924	2.4569	1.57742	1.39878	1.4881
VIL	0.739306	0.601813	0.670559	0.662127	0.676913	0.66952	0.271155	0.350141	0.310648
QKV	1.9618	2.63222	2.29701	2.93629	2.38526	2.66077	18.6117	17.93	18.2709
VIR	1.22959	0.679072	0.954329	1.16613	0.876359	1.02124	0.782517	0.544979	0.663748
VIS	0.668101	0.749216	0.708658	0.927236	1.08841	1.00782	0.237183	0.632174	0.434678
VIP	2.38005	1.81671	2.09838	2.2045	1.83374	2.01912	1.00043	1.00023	1.00033
VIQ	0.804247	0.519648	0.661947	1.1219	0.389678	0.755788	0.66047	0.392822	0.526646
VIV	1.0468	0.883019	0.964907	0.961011	0.70702	0.834016	6.90857	6.92392	6.91625
VIT	0.737154	0.527089	0.632122	0.669528	0.579202	0.624365	0.380054	0.409797	0.394926
TYT	1.08459	0.859963	0.972276	1.69057	1.64102	1.6658	0.996838	0.700879	0.848859
TYV	1.18437	2.87196	2.02816	2.05318	1.77434	1.91376	18.9407	17.4117	18.1762
VIY	2.21355	2.23891	2.22623	2.74404	2.67157	2.7078	0.978864	0.497433	0.738149
TYP	1.99502	2.99547	2.49524	2.29203	3.58589	2.93896	1.50149	2.43061	1.96605
TYQ	2.33207	1.28833	1.8102	1.09422	1.07068	1.08245	0.70913	1.25203	0.980578
TYR	2.50683	2.82834	2.66758	2.58099	2.86714	2.72406	1.83735	2.29047	2.06391
TYS	1.89201	1.8959	1.89395	1.75594	2.35408	2.05501	1.20996	1.4007	1.30533
RLC	3.56752	4.0219	3.79471	3.34619	2.89208	3.11914	1.31716	1.94727	1.63222
DGA	2.11392	1.72704	1.92048	2.34966	1.66735	2.00851	0.934391	1.14982	1.04211
DGF	2.27858	1.6278	1.95319	2.52275	1.75475	2.13875	0.808901	1.61628	1.21259
DGG	5.70629	5.56097	5.63363	6.8377	5.87025	6.35398	4.30807	3.8401	4.07408
DGD	2.51666	2.09883	2.30774	2.07118	2.27498	2.17308	1.81356	1.98568	1.89962
DGE	4.56928	3.50334	4.03631	3.10181	3.8761	3.48895	2.67909	1.62711	2.1531
DGK	2.97568	3.36831	3.17199	2.90451	2.90117	2.90284	1.65637	1.60016	1.62826
DGH	0.758151	0.335113	0.546632	0.87525	0.794896	0.835073	0.449897	0.436288	0.443093
DGI	2.87934	3.32137	3.10036	4.37477	2.65034	3.51255	2.1668	2.48904	2.32792
DGN	1.94496	2.00799	1.97647	2.15667	2.13171	2.14419	1.2608	1.05811	1.15946
DGL	1.98139	1.67821	1.8298	1.66788	2.05261	1.86024	0.997193	1.01971	1.00845
DGM	2.95807	1.82075	2.38941	2.26322	1.79214	2.02768	1.90927	1.4412	1.67523
DGR	4.7769	4.27263	4.52476	3.91013	5.51322	4.71167	3.18847	1.90159	2.54503
DGS	1.98214	2.07387	2.028	1.94575	1.67166	1.80871	1.18587	1.38632	1.2861
DGP	4.7236	3.60625	4.16492	5.12891	4.75548	4.94219	2.5376	3.61773	3.07766
DGQ	2.37084	1.4929	1.93187	1.9134	1.84581	1.87961	0.731324	1.03846	0.884892
DGV	3.17476	3.08947	3.13211	3.62432	2.98416	3.30424	18.3461	20.6247	19.4854
DGT	2.48154	2.46121	2.47137	3.12492	2.70016	2.91254	1.12697	1.66863	1.3978
DGY	3.24443	3.12023	3.18233	3.1948	3.50496	3.34988	2.78542	1.90574	2.34558
ITN	2.10733	2.04231	2.07482	2.02172	2.31077	2.16625	1.03832	1.38522	1.21177
ITL	1.77058	1.97146	1.87102	1.50861	1.30689	1.40775	1.19943	1.32854	1.26399
ITM	2.7405	2.3946	2.56755	3.06779	2.12526	2.59652	1.90914	1.44349	1.67631
ITK	2.62205	2.1469	2.38448	2.99422	2.62073	2.80747	1.6799	1.42069	1.5503
ITH	2.0575	1.14537	1.60143	1.21211	1.01993	1.11602	0.777762	0.341813	0.559787
ITI	2.49476	2.36437	2.42957	2.24673	2.53097	2.38885	1.44454	1.72572	1.58513
ITF	3.24627	3.41322	3.32975	2.85374	2.8623	2.85802	1.54601	2.40151	1.97376
ITG	4.1048	4.24608	4.17544	4.00994	3.75297	3.88145	2.88606	2.35376	2.61991
ITD	2.74281	2.48638	2.6146	2.21136	2.15139	2.18137	1.58507	1.34566	1.46536
ITE	3.48405	3.63346	3.55876	3.3447	3.8011	3.5729	2.19266	2.33572	2.26419
ITC	4.36969	2.1812	3.27544	2.41639	3.13396	2.77518	3.0663	1.37237	2.21934
GVQ	1.1204	0.886094	1.00325	1.67445	1.21622	1.44534	0.63593	0.851724	0.743827
ITA	3.07446	2.88718	2.98082	2.85728	2.79317	2.82523	1.61101	1.78639	1.6987
ITY	3.17227	2.78531	2.97879	3.00231	4.94141	3.97186	1.93399	2.49423	2.21411
ITV	2.69472	3.62722	3.16097	3.8239	3.64375	3.73383	17.1116	16.066	16.5888
ITT	1.76702	1.68089	1.72396	2.05863	2.06072	2.05968	0.928778	1.47037	1.19957
ITR	2.45486	2.20306	2.32896	2.11881	2.66186	2.39033	1.10534	1.41486	1.2601
ITS	2.01992	2.53091	2.27541	2.25893	2.02588	2.14241	1.2062	1.43811	1.32215
ITP	4.54339	4.48674	4.51506	4.14463	4.02736	4.086	2.93389	2.19524	2.56456
ITQ	2.22702	1.70037	1.9637	2.27758	1.74396	2.01077	0.767571	1.28171	1.02464
AAE	3.43272	3.55654	3.49463	2.871	3.75431	3.31265	2.06371	2.00583	2.03477
AAD	1.87067	1.89677	1.88372	1.84482	2.27634	2.06058	1.57632	1.35408	1.4652
AAG	2.39777	2.50352	2.45064	2.61958	2.2549	2.43724	1.43213	1.4566	1.44436
AAF	2.76769	3.07068	2.91918	2.72983	2.66223	2.69603	1.45518	2.09468	1.77493
AAA	2.63002	2.40591	2.51797	2.49533	2.11083	2.30308	1.40276	1.47763	1.44019
AAC	1.67971	3.21078	2.44524	1.77275	3.75035	2.76155	1.72178	2.289	2.00539
RDT	1.52725	1.255	1.39112	1.95132	1.44474	1.69803	1.63706	1.85733	1.74719
AAM	2.72907	3.1121	2.92058	2.5682	2.06805	2.31813	1.23781	1.36887	1.30334
AAL	1.31556	1.48944	1.4025	1.26115	1.39179	1.32647	0.723812	1.04096	0.882388
AAN	2.34821	1.82998	2.0891	1.86147	2.13073	1.9961	1.04326	0.866026	0.954645
GVV	2.31219	2.46721	2.3897	2.55665	2.24564	2.40114	14.5916	14.8609	14.7263
AAH	0.833573	0.524652	0.679112	0.683628	0.585419	0.634524	0.804769	0.389563	0.597166
AAK	2.42875	3.13897	2.78386	3.01343	2.61933	2.81638	1.42687	1.94577	1.68632
AAT	1.63429	1.7802	1.70724	1.84089	1.60465	1.72277	1.20665	1.23094	1.2188
AAW	2.74619	3.16098	2.95359	2.71235	2.14584	2.4291	2.41585	2.42124	2.41855
ELI	1.87225	1.86302	1.86764	2.16679	1.95577	2.06128	1.49042	1.47715	1.48378
AAQ	1.63443	1.45123	1.54283	1.55948	1.38433	1.4719	0.782753	0.668493	0.725623
AAP	3.81849	3.22215	3.52032	2.92959	2.54041	2.735	1.3677	1.29162	1.32966
AAS	1.89364	2.01284	1.95324	2.27539	1.90497	2.09018	1.2368	1.22353	1.23017
AAR	2.73084	3.25398	2.99241	3.08424	2.92942	3.00683	1.75187	1.7342	1.74304
RDQ	2.63687	3.02711	2.83199	2.13911	2.19583	2.16747	1.51161	1.34092	1.42626
AAY	2.91233	3.3565	3.13441	3.32028	3.17405	3.24716	2.26733	1.73192	1.99962
ELL	1.66519	1.41311	1.53915	1.77917	1.80699	1.79308	0.999962	1.40157	1.20077
RDR	4.8517	5.06953	4.96062	5.07359	5.47777	5.27568	4.84339	3.5123	4.17785
SLY	2.91133	3.76017	3.33575	2.63106	3.64222	3.13664	1.49861	1.23391	1.36626
SLT	1.44573	1.53533	1.49053	1.91241	1.58199	1.7472	0.829779	0.889254	0.859516
RDY	3.75911	3.98365	3.87138	3.8143	4.3624	4.08835	2.10652	3.12363	2.61507
SLV	1.95839	1.66307	1.81073	1.77234	1.88969	1.83102	12.9327	13.3875	13.1601
SLW	1.46588	1.61536	1.54062	2.00358	0.67205	1.33782	1.09668	0.787003	0.941843
SLP	3.36136	2.93395	3.14765	3.78168	2.93277	3.35723	2.34663	2.08436	2.21549
SLQ	1.07255	1.10261	1.08758	1.38007	1.29922	1.33964	0.826444	0.845521	0.835982
SLR	2.15005	1.58799	1.86902	2.30426	1.77498	2.03962	1.34555	1.49742	1.42148
SLS	1.89849	1.84555	1.87202	2.03181	1.93545	1.98363	1.25768	1.27441	1.26605
SLL	1.34858	1.18759	1.26808	1.40565	1.52757	1.46661	0.893756	0.931792	0.912774
SLM	1.72459	1.56025	1.64242	2.07334	1.91948	1.99641	0.652982	1.29848	0.975729
SLN	0.987018	0.906539	0.946779	1.35205	1.07152	1.21178	0.820342	0.734684	0.777513
SLH	0.960913	0.265556	0.613234	1.0789	0.889049	0.983977	0.328322	0.775	0.551661
SLI	1.79131	1.74575	1.76853	2.12796	1.78001	1.95399	1.20172	1.05975	1.13073
SLK	1.67936	1.4875	1.58343	1.98014	1.77643	1.87829	1.29604	1.33224	1.31414
SLD	1.06656	0.99438	1.03047	1.2693	0.942658	1.10598	0.733366	1.24635	0.989857
SLE	1.92076	1.97652	1.94864	1.97645	2.63975	2.3081	1.51149	1.5274	1.51945
SLF	2.31183	1.99841	2.15512	2.3298	1.94569	2.13775	1.19335	1.20819	1.20077
SLG	3.76475	3.77187	3.76831	3.78164	3.57865	3.68015	2.66104	2.33812	2.49958
SLA	2.34781	2.68634	2.51707	2.41804	2.66263	2.54033	1.56046	1.46096	1.51071
SLC	2.13127	1.76727	1.94927	2.04478	1.10739	1.57608	1.06506	0.909001	0.987029
GFR	3.08028	3.28884	3.18456	3.10956	2.5707	2.84013	2.38009	1.96199	2.17104
GFS	2.36451	1.99797	2.18124	1.79972	2.05328	1.9265	1.05054	1.50401	1.27727
GFP	3.02494	2.35403	2.68949	2.79223	2.58198	2.6871	1.41025	1.70071	1.55548
GFQ	2.46755	1.8121	2.13982	1.67439	2.06465	1.86952	1.27646	1.24681	1.26163
GFV	1.91703	2.60043	2.25873	2.04902	1.77807	1.91355	16.2187	18.2176	17.2181
GFT	1.49676	1.58508	1.54092	1.99825	1.58	1.78913	1.036	0.81845	0.927225
GFK	3.02289	2.38824	2.70556	2.90269	2.23418	2.56843	1.56662	1.47178	1.5192
GFH	0.158327	0.580275	0.369301	0.582887	0.413313	0.4981	0.312704	0.226117	0.269411
GFI	3.16742	3.81305	3.49023	3.94258	3.57049	3.75654	1.7991	2.11419	1.95665
GFN	1.83071	3.10409	2.4674	2.05763	2.24792	2.15278	1.65807	1.18315	1.42061
GFL	1.96822	1.58609	1.77716	1.54074	1.93575	1.73824	1.27837	1.26496	1.27166
GFM	2.10649	2.68278	2.39464	2.14017	2.71911	2.42964	2.00447	1.31068	1.65757
GFA	1.94692	2.24225	2.09459	2.70138	1.96749	2.33444	1.27376	1.15264	1.2132
GFG	3.22246	3.80256	3.51251	3.8857	4.52803	4.20686	1.77994	1.52319	1.65156
GFD	3.0354	2.25793	2.64667	3.00215	3.17068	3.08641	1.52443	2.31378	1.91911
GFE	2.30712	2.83487	2.571	2.99617	3.02671	3.01144	1.84569	2.11553	1.98061
LQY	4.69641	5.48028	5.08834	4.3294	5.36169	4.84555	2.8444	2.53016	2.68728
LQT	2.78636	2.75312	2.76974	3.13358	2.81929	2.97644	1.32659	1.50835	1.41747
LQV	3.49331	4.35032	3.92181	3.73916	4.20101	3.97008	23.1116	20.1176	21.6146
LQW	4.21019	6.49738	5.35379	4.04932	5.26611	4.65771	4.18322	3.34046	3.76184
LQP	8.30103	7.9495	8.12526	7.40604	8.32218	7.86411	3.64489	2.86068	3.25279
LQQ	2.97093	2.52667	2.7488	2.60678	2.39391	2.50035	1.91444	1.56659	1.74052
LQR	3.83999	4.61363	4.22681	4.55174	4.96287	4.7573	2.68928	3.03836	2.86382
LQS	3.17668	3.68693	3.4318	3.59114	3.7458	3.66847	2.48031	2.1488	2.31455
LQL	3.19797	2.49256	2.84527	2.78243	2.37776	2.58009	1.70803	1.99195	1.84999
LQM	2.78854	3.59293	3.19074	3.11997	3.0201	3.07003	1.54692	1.71236	1.62964
LQN	2.41587	2.97631	2.69609	2.80401	2.72937	2.76669	1.87245	1.2135	1.54297
LQH	2.07182	2.3297	2.20076	1.58807	2.49393	2.041	0.831801	1.73839	1.2851
LQI	3.35227	3.71984	3.53606	3.63723	3.66598	3.65161	2.35212	2.09418	2.22315
LQK	4.32123	4.53383	4.42753	4.7562	4.39374	4.57497	2.90425	2.43566	2.66995
LQD	2.90548	2.69811	2.8018	2.54473	2.58241	2.56357	1.70236	1.40373	1.55304
LQE	4.23063	5.22252	4.72658	3.82787	4.49853	4.1632	2.98208	2.82364	2.90286
LQF	3.30012	3.90186	3.60099	3.99591	4.04476	4.02033	1.88179	2.31997	2.10088
LQG	4.87444	4.7518	4.81312	5.13505	5.43865	5.28685	2.76378	2.15832	2.46105
LQA	4.73908	4.88601	4.81255	3.83902	3.62722	3.73312	2.27717	2.34799	2.31258
LQC	4.0937	4.33357	4.21364	3.32309	3.52391	3.4235	2.59681	3.58542	3.09112
RDN	2.90753	2.52276	2.71515	2.41896	2.31707	2.36802	1.45178	0.762627	1.10721
ELV	1.61985	1.46864	1.54424	2.31841	1.75081	2.03461	14.6932	15.4295	15.0613
ELW	5.99016	3.55608	4.77312	3.85109	3.69754	3.77432	2.54572	1.43707	1.9914
ELT	1.61169	1.23799	1.42484	1.73159	1.17362	1.45261	0.865042	1.06071	0.962874
KIY	1.83693	2.39979	2.11836	2.53381	2.25181	2.39281	1.50541	2.11025	1.80783
KIS	1.20293	1.42136	1.31215	1.48005	1.42338	1.45171	1.11914	0.858291	0.988715
KIR	2.24767	2.44726	2.34746	2.57018	2.12454	2.34736	1.92415	1.59623	1.76019
KIQ	1.75133	0.656045	1.20369	1.23907	0.635329	0.9372	0.927846	0.753895	0.84087
KIP	2.62161	2.02466	2.32314	2.62049	2.45989	2.54019	1.6033	2.01079	1.80704
KIW	1.34483	1.98341	1.66412	2.54562	1.8165	2.18106	1.15925	1.59493	1.37709
KIV	2.12272	2.54855	2.33564	2.54424	2.3101	2.42717	17.1873	16.6744	16.9309
KIT	1.23486	1.57214	1.4035	1.10646	1.18088	1.14367	1.28695	0.88117	1.08406
KIK	3.34941	2.83456	3.09199	3.8723	4.07365	3.97298	1.84726	2.86416	2.35571
KII	1.57911	1.73507	1.65709	2.00966	1.90488	1.95727	1.02462	1.27466	1.14964
KIH	0.998469	0.462696	0.730583	0.966924	1.5036	1.23526	0.58556	0.629851	0.607706
KIN	0.686991	0.97938	0.833186	0.984891	1.06617	1.02553	0.56078	0.764603	0.662692
KIM	1.16385	1.89752	1.53068	1.70354	1.46808	1.58581	1.03109	0.84098	0.936033
KIL	1.24566	1.29205	1.26886	1.32025	1.43874	1.37949	0.816407	1.0734	0.944901
KIC	2.70042	2.56368	2.63205	2.81145	3.02546	2.91846	1.38549	1.971	1.67824
KIA	1.62983	1.87508	1.75245	2.07327	1.64541	1.85934	1.12507	1.54424	1.33465
KIG	2.3579	1.90941	2.13366	2.11543	2.1077	2.11156	1.18229	1.35877	1.27053
KIF	1.3129	1.73897	1.52594	2.07438	1.64235	1.85836	1.12532	1.65263	1.38898
KIE	2.09704	1.57637	1.83671	1.57577	1.66037	1.61807	1.37287	0.935627	1.15425
KID	1.19185	0.805758	0.998804	1.1135	0.990095	1.0518	0.587798	0.675595	0.631697
CRS	1.82063	1.74256	1.78159	2.22	2.18037	2.20019	0.499901	1.55483	1.02736
CRD	1.89897	1.81171	1.85534	1.64881	2.31871	1.98376	0.534691	2.10295	1.31882
RLQ	2.93394	2.79623	2.86508	2.87137	2.6587	2.76503	1.73564	2.07044	1.90304
CRL	1.26151	0.851642	1.05658	1.84719	0.563701	1.20545	0.805005	0.443007	0.624006
MAE	3.28008	3.74059	3.51033	2.61432	4.22252	3.41842	1.23483	2.00666	1.62075
HRI	2.98951	3.10721	3.04836	3.57581	2.81282	3.19431	1.81067	0.972781	1.39173
EYD	1.50705	0.943628	1.22534	1.53816	1.44612	1.49214	0.875345	1.63091	1.25313
EYG	2.35681	2.37151	2.36416	3.10112	2.1179	2.60951	1.48593	2.13528	1.8106
LPW	7.69505	6.59119	7.14312	5.4071	5.67776	5.54243	2.56728	4.28415	3.42571
GTE	3.35126	4.15673	3.754	3.42407	4.47178	3.94793	1.88797	1.84643	1.8672
EYH	0.407633	0.451021	0.429327	1.04834	0.520799	0.784572	0.702611	0.358217	0.530414
LPT	5.12007	4.66843	4.89425	4.11514	4.65426	4.3847	2.2825	2.66244	2.47247
EYM	2.6945	1.93625	2.31537	2.38508	2.07184	2.22846	1.93037	0.788777	1.35957
LPR	5.63411	6.31134	5.97272	4.9611	5.54067	5.25089	3.39595	3.61913	3.50754
IPS	6.46569	6.39144	6.42856	4.38291	6.0296	5.20625	2.73474	3.40493	3.06983
LPP	6.55499	5.13121	5.8431	5.75695	6.09491	5.92593	2.91983	2.95405	2.93694
EYP	3.13859	2.69533	2.91696	3.55529	4.06051	3.8079	2.22008	1.42087	1.82047
LPM	2.77561	4.40683	3.59122	3.88919	4.1847	4.03694	1.84206	1.49477	1.66842
EYR	3.30153	4.45748	3.8795	3.49613	4.74323	4.11968	2.2528	1.99437	2.12359
LPH	2.10486	1.74874	1.9268	1.73005	1.27553	1.50279	0.721412	0.814943	0.768177
LPG	8.50016	9.87754	9.18885	7.19067	8.2608	7.72574	3.93633	3.31672	3.62653
TYH	0.583849	0.458499	0.521174	1.7646	0.802741	1.28367	0.499939	1.13795	0.818943
VIG	2.8261	1.91328	2.36969	2.21126	2.05041	2.13083	0.798686	0.905987	0.852336
VIE	1.2579	0.901228	1.07957	0.914827	1.1692	1.04201	0.927816	0.656587	0.792202
IPT	4.99913	5.12019	5.05966	4.15868	4.01901	4.08884	2.16342	2.53235	2.34788
VIK	0.426614	0.578176	0.502395	1.0038	0.79827	0.901035	0.573837	0.515888	0.544862
TYF	1.22464	1.89729	1.56097	1.53085	2.25236	1.8916	0.915839	0.848546	0.882193
ICK	1.94434	3.49143	2.71788	2.0983	2.10387	2.10108	1.53108	1.10897	1.32002
TYG	2.69853	2.79094	2.74474	4.27812	3.47795	3.87803	1.70396	1.89917	1.80157
ICI	4.42781	3.20348	3.81564	3.3014	3.34341	3.3224	2.45405	1.21902	1.83654
VIM	0.970381	0.77123	0.870805	1.19611	1.03246	1.11428	0.429373	0.919101	0.674237
CNS	2.5237	1.92166	2.22268	3.01148	3.3805	3.19599	1.43058	1.77647	1.60353
TYY	4.04043	3.05242	3.54642	2.94489	2.65502	2.79995	2.07763	1.90588	1.99176
RNN	2.00353	2.36608	2.18481	2.61846	2.91057	2.76451	1.56089	1.3278	1.44435
CNN	2.27194	1.11334	1.69264	1.66937	0.743034	1.2062	1.29547	0.78171	1.03859
ICQ	2.39289	2.85739	2.62514	2.55304	2.79485	2.67394	2.1915	0.550565	1.37103
CNK	2.39483	1.55932	1.97708	1.77069	1.52063	1.64566	2.31939	4.55287	3.43613
ICT	1.47867	2.02117	1.74992	1.41669	2.54698	1.98184	0.699444	0.406103	0.552774
GTR	5.85224	5.0872	5.46972	3.88832	4.26282	4.07557	2.686	3.24895	2.96747
CIA	0.311811	0.429881	0.370846	0.80613	0.205219	0.505674	0.382153	0.509488	0.445821
CIG	1.46271	1.50543	1.48407	1.65934	1.22058	1.43996	1.36858	1.61034	1.48946
CIF	0.318532	0.666509	0.49252	1.33599	0.734957	1.03547	0.334246	1.2335	0.783873
CIE	1.45362	0.624408	1.03902	1.18737	1.27092	1.22914	0.526529	0.376637	0.451583
CID	1.04438	0.534607	0.789494	0.28969	0.278701	0.284195	0.281922	0.539626	0.410774
CIK	1.17713	1.76004	1.46858	0.92698	0.557264	0.742122	0.293736	0.831797	0.562766
CII	0.795899	0.584508	0.690203	0.772821	1.26043	1.01663	0.668945	0.353942	0.511443
CIN	0.128976	1.19501	0.661991	0.598378	0.135578	0.366978	0.705963	0.350668	0.528316
CIL	0.662009	0.446735	0.554372	0.467994	0.430817	0.449406	0.604776	0.435675	0.520226
CIS	1.29077	1.1008	1.19578	0.963244	0.325699	0.644471	0.468078	0.240218	0.354148
CIR	1.80317	0.595459	1.19932	0.810632	0.649224	0.729928	0.358676	0.504748	0.431712
CIP	1.05707	2.17702	1.61704	2.25339	1.73474	1.99407	2.80311	1.62388	2.21349
CIV	1.05328	0.618377	0.835828	0.938445	0.772503	0.855474	6.61285	9.07725	7.84505
CIT	0.528708	0.368315	0.448512	1.06231	0.274041	0.668176	0.366837	0.528752	0.447794
DAD	1.7566	1.59427	1.67543	1.44922	1.81116	1.63019	1.25153	1.42461	1.33807
DAE	2.96633	2.75481	2.86057	1.96169	2.6035	2.2826	1.51718	1.65711	1.58715
DAF	1.82375	1.4967	1.66023	2.06972	2.83373	2.45172	1.31117	1.86467	1.58792
DAG	2.11516	1.29323	1.7042	1.64459	1.76019	1.70239	1.00198	1.01477	1.00837
DAA	1.92873	2.4478	2.18826	2.85673	2.7857	2.82121	1.32466	1.65213	1.4884
DAC	0.961883	3.56279	2.26234	2.63815	1.0769	1.85752	1.17591	1.88351	1.52971
DAL	1.19734	1.10649	1.15191	1.46896	1.12166	1.29531	0.758461	1.00974	0.8841
DAM	1.36714	2.69503	2.03108	1.8267	2.23152	2.02911	1.56363	1.13046	1.34705
DAN	2.24303	1.61682	1.92992	1.83305	1.70583	1.76944	0.598003	1.11677	0.857387
DAH	0.398047	0.290354	0.3442	0.518558	0.375415	0.446986	0.206467	0.0683458	0.137406
DAI	2.31266	2.1575	2.23508	2.32498	2.09084	2.20791	1.40136	1.57287	1.48711
DAK	3.19099	3.22115	3.20607	3.4702	3.55372	3.51196	1.67394	1.44911	1.56153
DAT	1.6974	1.47956	1.58848	1.84648	1.46984	1.65816	1.5895	0.790792	1.19015
DAV	2.01019	1.86029	1.93524	1.95297	1.71864	1.8358	13.1205	14.1409	13.6307
DAP	3.288	2.75768	3.02284	2.64441	2.97008	2.80725	2.04116	1.59612	1.81864
DAQ	1.85911	1.08754	1.47332	0.957273	1.68571	1.32149	0.730558	1.08579	0.908174
DAR	4.01794	3.55586	3.7869	3.13551	2.95194	3.04373	2.324	1.96043	2.14222
DAS	1.96591	2.17931	2.07261	2.22873	2.04639	2.13756	1.32886	1.18331	1.25608
DAY	3.09471	3.20378	3.14924	2.55089	3.86435	3.20762	1.62262	2.30885	1.96573
AGN	2.7684	3.23704	3.00272	2.59708	2.49037	2.54372	1.78217	1.19334	1.48775
AGM	3.56224	3.34165	3.45194	2.78398	2.28332	2.53365	1.50484	2.08289	1.79386
AGL	2.23052	2.99279	2.61166	2.24424	2.61443	2.42933	1.53499	1.5494	1.5422
AGK	3.59833	4.35887	3.9786	3.59884	3.56526	3.58205	2.34767	1.95431	2.15099
AGI	4.13767	4.71422	4.42595	4.38566	3.91174	4.1487	2.15726	2.48776	2.32251
AGH	1.24605	1.0681	1.15708	1.51641	1.13834	1.32737	1.7688	0.892376	1.33059
AGG	6.5545	6.54236	6.54843	6.30657	7.1598	6.73319	3.43894	3.1651	3.30202
NYS	1.75575	1.36822	1.56198	1.60601	2.29334	1.94968	1.22694	1.25835	1.24265
AGE	5.15362	6.42184	5.78773	4.96457	5.48519	5.22488	2.9299	2.93614	2.93302
AGD	3.72039	3.37956	3.54997	3.53861	4.17875	3.85868	1.68815	2.04431	1.86623
NYV	2.09094	1.94924	2.02009	2.02899	1.94342	1.98621	19.2435	17.093	18.1682
NYT	1.78417	1.64063	1.7124	1.69849	1.72222	1.71036	1.02513	0.621648	0.823391
NYK	2.38591	1.3342	1.86006	2.48855	1.85659	2.17257	1.15429	0.794641	0.974466
NYH	0.799511	0.268711	0.534111	1.00947	0.716594	0.86303	0.245852	1.41567	0.830762
NYI	2.53856	1.96481	2.25169	2.00718	1.53682	1.772	1.31222	0.917517	1.11487
NYN	1.31542	1.09332	1.20437	1.04419	1.54274	1.29347	1.01848	0.513584	0.76603
AGY	3.81321	5.04818	4.4307	4.58707	4.40685	4.49696	2.50724	2.24005	2.37364
AGV	4.13349	5.08435	4.60892	4.17876	4.36081	4.26979	23.0349	23.2826	23.1588
NYA	1.55152	1.89172	1.72162	2.14649	1.72206	1.93428	1.64897	2.50883	2.0789
NYF	0.93275	1.68399	1.30837	1.77037	0.97883	1.3746	0.969922	0.649681	0.809801
NYG	2.71064	2.33903	2.52483	1.97999	2.42365	2.20182	0.876094	1.32303	1.09956
AGQ	2.428	3.04439	2.73619	3.58523	2.88659	3.23591	1.50136	1.13882	1.32009
AGP	4.17261	3.85329	4.01295	4.59275	3.57276	4.08275	3.01897	3.57047	3.29472
NMV	1.76377	0.905173	1.33447	1.45453	1.0044	1.22946	14.1763	12.8406	13.5084
TDI	3.6607	4.47542	4.06806	3.18209	3.62419	3.40314	2.36321	2.20694	2.28507
NMS	0.890999	0.901505	0.896252	1.18159	0.921846	1.05172	1.63888	1.22372	1.4313
SNF	3.25814	3.45304	3.35559	2.54027	3.72133	3.1308	2.06592	1.77086	1.91839
MAP	3.00026	3.03888	3.01957	2.66628	1.21845	1.94236	1.56952	3.26207	2.41579
SND	3.0533	3.32757	3.19043	2.96372	3.7394	3.35156	2.03379	1.94111	1.98745
SNE	3.83263	4.38196	4.10729	3.47424	4.43832	3.95628	2.38998	2.3035	2.34674
SNC	2.95796	3.15875	3.05835	2.80488	2.7564	2.78064	1.98272	2.27111	2.12691
MAV	2.4994	2.94954	2.72447	2.41042	3.22695	2.81868	17.1344	15.1434	16.1389
MAY	2.90528	2.75357	2.82942	2.886	3.96288	3.42444	1.04583	1.39884	1.22233
SNL	2.46618	2.92384	2.69501	2.41303	3.00297	2.708	1.49668	1.55325	1.52497
SNM	2.73101	2.50538	2.61819	2.51939	2.84361	2.6815	1.46146	2.06223	1.76185
SNK	2.77408	3.65563	3.21485	2.995	3.11479	3.05489	1.81225	1.81456	1.81341
SNH	1.56344	1.5871	1.57527	1.56598	1.43808	1.50203	1.30033	2.10682	1.70357
SNI	3.56506	4.0162	3.79063	3.72755	4.14545	3.9365	2.68889	1.99792	2.34341
SNV	3.70238	4.28787	3.99512	4.05681	3.84002	3.94841	22.151	23.1775	22.6643
SNW	4.62805	5.30028	4.96416	3.88382	4.50067	4.19224	2.72763	1.78324	2.25544
SNT	2.86107	3.23209	3.04658	2.76854	3.28053	3.02454	1.78141	1.86463	1.82302
SNR	6.77985	7.41611	7.09798	7.29457	7.92292	7.60875	3.92253	5.04285	4.48269
MAD	1.9174	3.0852	2.5013	1.47194	2.66872	2.07033	0.953016	1.99908	1.47605
SNP	5.52307	5.44697	5.48502	5.28343	5.7253	5.50436	3.45081	3.19695	3.32388
MAF	1.96269	2.57014	2.26642	2.00091	2.70794	2.35442	1.6016	1.70242	1.65201
MAI	2.33696	2.75226	2.54461	2.84473	1.92444	2.38458	2.19603	0.996924	1.59648
MAK	2.52569	3.16029	2.84299	2.91763	2.8442	2.88092	2.01784	1.48488	1.75136
MAL	1.26077	1.51921	1.38999	1.42755	1.60369	1.51562	1.15105	1.14074	1.1459
MAN	1.94448	1.5434	1.74394	2.00028	1.69654	1.84841	0.812285	1.60326	1.20777
EVH	1.06207	0.511343	0.786707	0.87585	0.817218	0.846534	1.21329	0.673502	0.943398
EVI	1.98324	1.55937	1.7713	1.94176	1.82827	1.88501	1.93742	2.81804	2.37773
EVK	2.0014	2.90602	2.45371	2.95505	2.90286	2.92896	2.61955	2.47107	2.54531
EVL	1.70316	1.35037	1.52676	1.62007	1.57371	1.59689	1.36311	1.72036	1.54174
EVM	3.40628	1.50134	2.45381	2.27799	1.21981	1.7489	1.47406	2.68835	2.08121
EVN	1.71369	1.46751	1.5906	1.89574	1.78575	1.84074	1.34459	1.50193	1.42326
EVA	1.93549	1.84833	1.89191	2.33805	1.75442	2.04624	1.82211	2.98547	2.40379
EVC	1.81277	2.05175	1.93226	2.33628	2.32767	2.33197	1.40857	4.01688	2.71273
EVD	1.31536	1.01954	1.16745	1.4814	1.33593	1.40866	1.32178	1.41736	1.36957
EVE	2.75047	2.42723	2.58885	2.42677	3.17259	2.79968	2.49168	3.03418	2.76293
EVF	2.28	1.7585	2.01925	1.95771	1.8221	1.88991	2.87255	3.03961	2.95608
EVG	4.08826	3.46966	3.77896	3.87775	3.58359	3.73067	3.01837	3.48448	3.25143
EVY	3.45192	3.54365	3.49779	2.89079	2.76833	2.82956	2.7346	2.48464	2.60962
EVP	2.95095	2.66563	2.80829	2.96709	3.65765	3.31237	1.61744	2.22961	1.92353
EVQ	1.58963	1.39471	1.49217	2.12412	2.01074	2.06743	1.61585	1.27785	1.44685
EVR	2.89001	2.59957	2.74479	2.91547	2.43533	2.6754	2.94426	2.24005	2.59215
EVS	1.44136	1.76504	1.6032	1.75794	1.6055	1.68172	1.33641	1.54424	1.44032
EVT	0.957883	0.814743	0.886313	0.819848	0.961942	0.890895	0.952556	1.3661	1.15933
EVV	1.68334	1.85845	1.77089	2.24401	1.95586	2.09994	13.5009	15.153	14.327
EVW	3.869	5.7787	4.82385	5.00663	5.09806	5.05235	3.4248	3.21385	3.31932
LSF	2.57946	2.90833	2.74389	2.37042	2.20683	2.28863	1.77908	1.39713	1.58811
LSG	2.60117	2.66572	2.63344	2.57932	2.42875	2.50404	1.65517	1.85653	1.75585
LSD	2.1858	2.44471	2.31526	2.4479	2.63786	2.54288	1.46138	1.60139	1.53138
LSE	3.0616	3.63158	3.34659	3.11159	3.45971	3.28565	1.67309	1.86	1.76655
LSC	3.83648	2.71467	3.27558	2.14538	1.72016	1.93277	1.98516	1.92507	1.95511
LSA	2.87832	2.53045	2.70439	2.59113	2.27998	2.43556	1.30228	1.65139	1.47683
LSN	1.49088	1.98701	1.73894	1.61664	1.66718	1.64191	1.14835	1.13821	1.14328
LSL	1.94271	2.06774	2.00523	2.29602	2.17885	2.23744	1.19896	1.61008	1.40452
LSM	2.75401	2.64575	2.69988	2.22914	2.11875	2.17394	1.70636	1.61766	1.66201
LSK	3.03889	2.92794	2.98341	3.40144	2.97911	3.19028	1.77685	2.37166	2.07425
LSH	1.06541	1.05205	1.05873	1.19157	0.854747	1.02316	0.727501	0.923941	0.825721
LSI	2.71772	2.66111	2.68941	3.01432	2.28726	2.65079	1.88709	1.38312	1.6351
LSV	3.10346	2.89024	2.99685	3.08174	2.7107	2.89622	17.7279	19.3562	18.542
LSW	3.62673	3.06055	3.34364	3.85879	3.55787	3.70833	2.91784	2.67858	2.79821
LST	1.9692	1.7745	1.87185	2.31557	2.04796	2.18177	1.40925	1.4302	1.41972
LSR	3.54561	3.56057	3.55309	3.26961	3.08904	3.17932	1.91644	2.01258	1.96451
LSS	3.06708	3.08804	3.07756	2.88642	2.98558	2.936	1.64957	1.82315	1.73636
LSP	4.77625	4.97281	4.87453	4.35918	4.8214	4.59029	2.57598	2.45084	2.51341
LSQ	2.43231	2.16638	2.29934	2.02545	1.82752	1.92649	1.29315	1.23936	1.26625
LSY	2.89438	3.7499	3.32214	3.43496	3.30456	3.36976	1.81466	2.13299	1.97382
NMN	0.437246	1.04424	0.740743	0.559802	0.963558	0.76168	0.545686	0.602186	0.573936
TDQ	6.80023	5.19659	5.99841	5.21159	6.57345	5.89252	3.18737	2.65019	2.91878
QHS	2.54082	2.69906	2.61994	1.96317	2.92294	2.44306	1.81368	1.50118	1.65743
QHP	6.31538	5.57312	5.94425	7.42512	5.91554	6.67033	3.61278	3.79889	3.70584
QHQ	1.64683	1.93307	1.78995	2.05556	1.67679	1.86617	1.17558	0.827004	1.00129
QHV	2.8218	4.38057	3.60119	2.88148	3.53257	3.20703	21.4976	21.4483	21.4729
QHT	1.82677	2.6185	2.22264	2.33406	2.07623	2.20514	1.13608	0.391013	0.763549
KKT	1.71714	1.724	1.72057	1.88323	1.92432	1.90378	1.21643	1.20676	1.2116
KKW	1.6082	2.31486	1.96153	1.98148	2.78073	2.38111	1.53238	1.44568	1.48903
KKV	2.53159	3.36697	2.94928	3.24785	2.95084	3.09935	18.5173	19.561	19.0391
KKQ	2.01828	1.70485	1.86157	2.11108	2.20098	2.15603	1.48553	1.22317	1.35435
KKP	4.07219	4.11736	4.09478	4.02762	4.04833	4.03797	2.51716	2.12974	2.32345
KKS	1.80883	1.87089	1.83986	1.98559	1.8547	1.92015	1.28826	0.9815	1.13488
KKR	4.85682	4.64329	4.75005	4.77631	4.63002	4.70317	3.37068	3.53828	3.45448
KKM	1.16366	1.9378	1.55073	1.55452	1.71523	1.63488	0.90103	0.505745	0.703388
KKL	1.60544	1.70942	1.65743	1.9842	1.69507	1.83963	1.36675	1.32566	1.3462
QHA	2.81906	3.62756	3.22331	3.00216	2.38707	2.69462	1.41165	1.05948	1.23557
KKI	1.89578	2.1087	2.00224	2.31879	2.49287	2.40583	1.50727	1.49417	1.50072
KKH	0.763815	0.751685	0.75775	0.813582	0.470145	0.641864	0.349136	0.44742	0.398278
KKK	5.94499	5.63914	5.79206	6.50821	6.34371	6.42596	4.49328	4.36217	4.42773
QHE	2.76756	3.26325	3.01541	2.38613	3.3119	2.84902	3.19881	1.09364	2.14623
KKE	2.75971	3.42785	3.09378	2.9933	3.24273	3.11802	2.18656	1.8618	2.02418
KKD	1.48549	1.93729	1.71139	1.41317	1.54118	1.47717	1.05645	0.924702	0.990577
KKG	2.64588	3.46854	3.05721	2.70355	3.08837	2.89596	1.70056	2.23965	1.9701
KKF	1.75051	2.29835	2.02443	2.12024	2.31317	2.21671	1.3371	1.94559	1.64134
QHN	1.58121	1.03312	1.30717	1.53416	1.37258	1.45337	0.570674	1.8509	1.21079
KKC	1.88061	3.78147	2.83104	1.67478	1.81942	1.7471	2.23712	2.0296	2.13336
CTV	2.404	2.93606	2.67003	3.09117	2.51547	2.80332	17.6944	17.9327	17.8136
CTS	1.64577	2.11497	1.88037	2.1321	2.42272	2.27741	0.387985	1.17887	0.783428
CTE	2.19484	3.07588	2.63536	2.77383	3.15443	2.96413	1.93265	1.54344	1.73804
CTG	3.3058	2.56151	2.93366	2.09898	3.54539	2.82218	1.52944	1.46788	1.49866
CTA	2.8475	2.34943	2.59846	2.60248	2.09096	2.34672	1.12446	2.271	1.69773
CTL	1.09959	1.51352	1.30655	1.05421	2.09763	1.57592	1.36332	0.598733	0.981026
CTN	1.9177	2.30723	2.11246	2.22856	1.36471	1.79664	1.16289	1.92434	1.54361
CTI	1.18586	2.12781	1.65684	2.54521	1.90774	2.22647	1.82468	1.8274	1.82604
CTK	2.6548	1.13096	1.89288	0.883628	3.82269	2.35316	1.71527	0.646893	1.18108
VYQ	0.943789	1.2359	1.08984	0.740325	1.03359	0.886958	0.610016	1.0221	0.816058
AHA	3.59706	3.15839	3.37772	2.93637	2.65161	2.79399	2.0233	1.80738	1.91534
AHF	3.49819	3.50711	3.50265	2.70372	3.01077	2.85724	2.06995	2.18465	2.1273
AHG	6.07385	4.43043	5.25214	4.9048	5.66966	5.28723	2.16042	4.00595	3.08318
AHD	4.74994	3.48322	4.11658	2.86671	3.79109	3.3289	1.83121	1.34649	1.58885
NPD	5.15942	5.29149	5.22546	5.0457	5.7702	5.40795	4.22143	2.42536	3.32339
YSK	2.41227	2.3717	2.39199	2.55146	2.26354	2.4075	1.46322	1.20613	1.33468
YSI	1.59986	2.50922	2.05454	2.01144	1.78804	1.89974	1.2568	2.00408	1.63044
YSH	0.76183	0.823531	0.79268	0.42506	0.792066	0.608563	0.404799	0.699225	0.552012
YSN	1.43791	1.25338	1.34565	1.63099	1.64097	1.63598	1.38543	1.23044	1.30793
YSM	2.14881	1.43692	1.79287	1.78091	1.09827	1.43959	1.99362	0.753373	1.37349
YSL	1.85249	1.61735	1.73492	1.87979	1.59858	1.73918	1.97152	1.39328	1.6824
YSC	1.9161	2.24787	2.08199	2.39219	2.38235	2.38727	2.02402	0.938338	1.48118
AHN	2.30966	2.53292	2.42129	2.31881	2.70532	2.51206	1.78108	1.35247	1.56677
YSA	2.35896	2.32834	2.34365	2.40435	2.21947	2.31191	1.19766	3.03421	2.11594
YSG	2.5654	1.9144	2.2399	2.46662	1.82138	2.144	1.0258	1.30979	1.1678
YSF	2.76548	1.83674	2.30111	2.1549	2.23119	2.19304	0.904939	1.44777	1.17636
YSE	2.43516	2.15259	2.29387	2.95142	2.00902	2.48022	1.54376	2.07135	1.80756
YSD	2.1226	1.95435	2.03847	1.99586	1.64484	1.82035	2.41547	1.58909	2.00228
YSY	2.03442	2.11138	2.0729	3.36492	2.27523	2.82007	1.45265	2.25409	1.85337
AHL	1.77981	2.65813	2.21897	2.38364	2.34388	2.36376	1.24939	1.31118	1.28029
YSS	2.27676	2.16602	2.22139	2.08766	1.78316	1.93541	1.18441	1.34162	1.26302
YSR	2.53032	1.87301	2.20166	2.51924	2.58414	2.55169	1.39402	2.33255	1.86329
YSQ	1.58796	1.38516	1.48656	2.15703	1.26928	1.71316	0.892985	1.20184	1.04741
YSP	2.21425	2.72975	2.472	3.87307	3.39052	3.6318	2.18721	1.77163	1.97942
YSV	2.0459	2.39734	2.22162	2.29886	2.73617	2.51751	18.2735	19.6185	18.946
YST	1.76559	1.03214	1.39886	1.52573	1.46862	1.49718	1.07558	0.773281	0.924429
AHV	2.74772	2.93376	2.84074	3.09026	2.78555	2.93791	17.0667	17.576	17.3213
NPV	4.35707	4.81721	4.58714	4.47847	4.09225	4.28536	25.8075	24.6804	25.244
SNQ	2.58875	2.60969	2.59922	2.34593	2.72042	2.53317	2.16341	1.96401	2.06371
WYS	2.76505	4.9151	3.84008	3.49897	2.00872	2.75385	1.47587	1.68431	1.58009
LNN	2.26741	2.40202	2.33472	1.97835	2.8475	2.41292	1.46363	1.34261	1.40312
VMN	0.933678	1.11764	1.02566	1.35819	0.792473	1.07533	0.251334	0.624982	0.438158
VML	0.490382	0.13868	0.314531	0.586988	0.207288	0.397138	0.341586	0.431911	0.386748
VMK	1.05611	1.05085	1.05348	1.1541	1.71571	1.4349	0.46756	0.583768	0.525664
VMI	1.70518	1.21177	1.45848	1.71635	1.08124	1.39879	0.863961	1.54506	1.20451
VMG	2.64142	0.817833	1.72963	2.16297	1.30855	1.73576	0.630685	2.66382	1.64725
VMD	2.05609	0.99514	1.52561	0.816935	0.922799	0.869867	0.403619	0.393772	0.398696
VME	1.33439	1.38003	1.35721	1.66014	1.6131	1.63662	0.887406	2.03938	1.46339
VMA	1.10517	1.31014	1.20765	2.01771	1.79809	1.9079	1.31564	0.88637	1.101
FGL	2.25683	2.01953	2.13818	2.19215	2.12577	2.15896	1.23965	1.30722	1.27343
VMV	0.914904	0.76064	0.837772	1.26055	1.01499	1.13777	7.59304	7.42068	7.50686
VMT	0.261077	0.674716	0.467896	0.67837	0.56447	0.62142	0.25749	0.376829	0.31716
VMR	0.572305	0.960018	0.766162	1.08003	1.10505	1.09254	0.443817	0.799585	0.621701
VMS	1.03959	0.754554	0.897073	0.80803	1.26344	1.03574	0.40669	0.817448	0.612069
VMP	2.75295	1.7157	2.23432	2.30463	1.61853	1.96158	2.11914	1.13933	1.62923
VMQ	0.560742	1.07062	0.815683	0.459061	0.321407	0.390234	0.584154	0.50807	0.546112
FYA	2.52123	1.10185	1.81154	2.42002	1.83423	2.12713	0.633851	0.781054	0.707452
FYF	1.35717	1.02658	1.19187	1.12881	1.2172	1.173	0.274665	0.572129	0.423397
FYG	1.44212	1.6198	1.53096	1.85108	2.22221	2.03664	1.27651	0.882546	1.07953
FYD	0.856714	1.05851	0.957613	1.35588	1.18217	1.26902	0.850067	0.586968	0.718518
FYE	1.38356	2.45496	1.91926	2.03674	1.35609	1.69642	1.41591	1.30745	1.36168
FYK	1.5518	1.60881	1.5803	2.53319	2.07758	2.30538	0.923565	0.941021	0.932293
FYH	0.53002	0.321898	0.425959	1.13635	0.501356	0.818854	0.143048	0.650494	0.396771
FYI	0.82762	1.56504	1.19633	0.966157	1.22069	1.09342	1.01926	1.06763	1.04344
FYN	0.90685	1.08648	0.996665	1.08156	0.890109	0.985835	1.44427	0.85274	1.14851
FYL	1.00018	1.16164	1.08091	1.61295	1.44594	1.52945	0.965737	0.761613	0.863675
FYR	2.06905	2.14623	2.10764	1.23866	2.27657	1.75762	0.787305	1.28671	1.03701
FYS	2.26028	1.81074	2.03551	2.34367	2.08942	2.21654	0.966963	1.36464	1.1658
FYP	3.32227	2.65288	2.98757	3.08031	3.61902	3.34966	2.43384	2.41936	2.4266
FYQ	0.558736	1.15683	0.857783	1.22052	1.02162	1.12107	0.535096	0.488544	0.51182
FYV	1.43767	1.39965	1.41866	1.48233	0.884094	1.18321	14.2795	15.4197	14.8496
FYT	2.19425	2.0031	2.09867	2.39521	1.66269	2.02895	1.032	1.00881	1.02041
FYY	2.28634	1.79005	2.03819	1.95402	2.35265	2.15333	1.55367	1.05615	1.30491
QSA	2.55864	2.57943	2.56903	2.68917	1.8841	2.28663	1.44749	1.91762	1.68255
QSG	1.98899	1.99464	1.99181	2.59001	2.11083	2.35042	1.75034	2.5992	2.17477
QSF	1.71902	1.77333	1.74617	2.36375	2.5406	2.45218	1.36148	1.1708	1.26614
QSE	2.58848	2.99998	2.79423	2.58263	2.93113	2.75688	1.97516	1.67365	1.8244
QSD	2.0141	2.23235	2.12323	2.56714	2.25157	2.40935	1.35139	0.782069	1.06673
QSK	2.68424	3.14042	2.91233	2.93107	3.35345	3.14226	1.60526	1.9569	1.78108
QSI	2.04587	2.12406	2.08496	2.11386	2.12678	2.12032	1.57069	1.32418	1.44744
QSH	1.19861	1.23521	1.21691	1.33282	0.5744	0.953612	0.775753	1.32684	1.0513
QSN	1.50592	1.11511	1.31051	1.59698	1.62312	1.61005	0.926411	0.845823	0.886117
QSM	1.77521	2.19897	1.98709	1.64909	1.69607	1.67258	0.632972	1.70536	1.16917
QSL	2.07518	1.92782	2.0015	1.83445	1.92633	1.88039	0.996214	1.59826	1.29724
QSS	2.54027	2.68418	2.61223	2.35438	2.5731	2.46374	1.73329	1.35044	1.54186
QSR	2.52894	3.18472	2.85683	3.58384	3.18967	3.38676	1.88028	2.26756	2.07392
QSQ	1.66473	1.86912	1.76692	2.0204	1.92095	1.97068	1.06856	1.32429	1.19643
QSP	3.49421	3.27165	3.38293	4.33888	3.46699	3.90293	2.49136	2.3626	2.42698
QSV	2.20911	2.75538	2.48225	3.22767	2.30021	2.76394	18.75	21.0742	19.9121
QST	1.34837	1.68162	1.515	1.96935	1.39793	1.68364	1.06294	1.25393	1.15843
QSY	3.90985	2.89489	3.40237	2.74166	3.51339	3.12752	2.29288	1.41643	1.85465
ECF	2.88662	3.8773	3.38196	1.83561	3.63835	2.73698	1.86486	1.17906	1.52196
PAP	1.70324	1.45569	1.57946	1.69643	1.39206	1.54424	1.31781	1.28251	1.30016
CKD	1.42833	1.70386	1.5661	0.77971	1.23726	1.00848	1.71586	1.00624	1.36105
CKG	4.55017	3.34803	3.9491	3.32479	5.2012	4.263	1.338	1.68272	1.51036
PAS	1.80818	1.85022	1.8292	1.80725	2.15753	1.98239	1.18822	1.11654	1.15238
PAT	1.7196	1.5146	1.6171	1.52901	1.4124	1.47071	1.65712	0.748812	1.20297
PAV	2.54853	2.00764	2.27808	2.35518	2.73805	2.54661	16.1174	17.0395	16.5785
CKL	1.53817	1.23393	1.38605	1.30701	0.976508	1.14176	0.617721	0.341593	0.479657
CKN	1.32331	2.09046	1.70688	1.35899	1.36363	1.36131	0.9781	0.208971	0.593536
CKI	1.73763	0.800315	1.26897	0.945927	0.884955	0.915441	0.735582	1.02128	0.878434
CKK	0.720179	1.44028	1.08023	1.05795	1.65117	1.35456	0.602756	0.566985	0.58487
CKT	1.29099	0.884379	1.08769	1.08296	0.970684	1.02682	1.07818	0.395103	0.736643
CKV	0.884916	1.45114	1.16803	2.43804	2.1612	2.29962	13.422	14.0287	13.7254
PAD	2.85199	2.70418	2.77809	3.04157	2.80391	2.92274	2.86471	1.43419	2.14945
PAE	2.87659	3.37337	3.12498	2.81506	2.51305	2.66405	1.30169	2.27357	1.78763
PAF	1.48352	1.43536	1.45944	1.77267	1.39619	1.58443	0.822563	0.446918	0.634741
CKR	2.70833	2.16507	2.4367	1.37304	2.3012	1.83712	1.14894	2.39159	1.77026
PAI	3.4394	2.68231	3.06086	3.75014	2.84984	3.29999	2.48354	2.55399	2.51877
PAK	3.30291	2.074	2.68846	1.938	2.01549	1.97674	1.2709	1.21736	1.24413
PAL	1.66886	1.08551	1.37719	1.45244	1.31969	1.38606	0.770322	0.839189	0.804755
PAM	1.75648	1.59423	1.67536	1.75618	1.28717	1.52168	0.843464	0.566334	0.704899
PAN	1.8412	1.61227	1.72674	1.92458	1.52017	1.72237	1.18758	1.24668	1.21713
DCL	2.92611	3.52485	3.22548	2.46613	2.722	2.59407	2.05311	1.86766	1.96038
DCI	4.43779	4.1432	4.2905	3.04721	3.814	3.4306	2.03056	1.66315	1.84686
DCF	3.63553	4.33122	3.98337	3.16161	4.8566	4.00911	2.78218	1.35845	2.07031
DCD	1.79473	1.95641	1.87557	2.03694	2.97907	2.508	1.65324	2.51872	2.08598
DCV	1.86843	3.02992	2.44918	2.82815	3.08942	2.95878	20.5978	18.4884	19.5431
DCT	1.94368	2.52451	2.2341	2.32844	2.60844	2.46844	1.21005	1.18823	1.19914
DCS	3.18732	3.72806	3.45769	3.2954	3.12688	3.21114	2.10495	2.18355	2.14425
IHY	4.49115	3.98178	4.23647	3.62388	4.17486	3.89937	2.37787	2.69885	2.53836
IHR	2.60411	2.09619	2.35015	2.97603	1.99467	2.48535	1.66247	1.26672	1.46459
IHS	3.09161	2.18295	2.63728	2.4474	2.17217	2.30978	1.37892	1.59882	1.48887
IHP	3.55415	4.20787	3.88101	4.79088	4.75534	4.77311	1.58228	2.04316	1.81272
IHQ	1.01798	0.92109	0.969534	1.96756	1.92863	1.94809	1.23733	1.02243	1.12988
IHV	2.96426	2.33963	2.65195	3.45951	2.99296	3.22624	17.1378	16.6398	16.8888
IHT	2.18834	2.77642	2.48238	1.49448	2.00273	1.74861	1.42601	1.63404	1.53003
IHK	2.92864	3.13287	3.03075	3.1134	3.38193	3.24766	1.25756	2.22585	1.7417
IHH	0.93022	0.951796	0.941008	1.17715	1.05956	1.11836	1.2886	0.908981	1.09879
IHI	3.20895	3.25542	3.23218	2.83339	2.31501	2.5742	1.02042	1.13806	1.07924
IHN	2.19254	2.33757	2.26506	2.04788	2.07678	2.06233	1.13624	0.75583	0.946034
IHL	1.40712	1.09241	1.24977	1.57307	1.3184	1.44573	0.516116	0.68106	0.598588
IHA	3.48234	4.39917	3.94075	3.74051	2.8624	3.30146	1.78717	1.31751	1.55234
IHF	1.79612	1.9995	1.89781	2.7849	2.08672	2.43581	1.13787	1.14373	1.1408
IHG	5.00757	4.74867	4.87812	4.72586	4.00841	4.36713	2.53483	2.4383	2.48656
IHD	2.02779	2.35805	2.19292	1.7506	2.08299	1.91679	1.41846	1.82877	1.62362
IHE	3.79881	4.53416	4.16649	4.38167	3.64324	4.01246	2.71156	2.42328	2.56742
AEQ	1.11713	1.62423	1.37068	1.7386	1.55262	1.64561	0.865465	1.51539	1.19043
AEP	3.90915	3.25565	3.5824	3.69445	3.56331	3.62888	2.31409	2.57976	2.44692
AES	2.03361	2.23165	2.13263	1.8078	1.84906	1.82843	1.43842	1.21651	1.32747
AER	4.13067	2.84128	3.48597	3.92198	3.57837	3.75017	2.38095	3.22581	2.80338
AET	1.5891	2.41633	2.00271	2.15458	2.05887	2.10673	1.39014	1.15259	1.27137
AEV	3.98918	4.55102	4.2701	4.50912	3.51511	4.01212	23.777	24.0945	23.9357
AEY	3.28315	5.6461	4.46462	3.18494	4.0949	3.63992	2.17658	2.15479	2.16568
AEA	2.58361	2.19104	2.38733	2.41875	2.48262	2.45068	1.77288	1.2853	1.52909
AEE	2.96391	3.09896	3.03144	2.91789	3.02836	2.97313	2.11385	1.55496	1.8344
AED	2.38419	2.00566	2.19492	2.12356	2.016	2.06978	1.34568	1.66811	1.5069
AEG	2.90878	3.43366	3.17122	3.12319	3.97306	3.54812	2.31738	1.85805	2.08772
AEF	2.82408	3.68799	3.25603	3.4273	2.83736	3.13233	2.39497	1.77335	2.08416
AEI	2.32998	3.06858	2.69928	2.45109	2.91422	2.68266	1.43666	1.80631	1.62148
AEH	1.34336	1.6312	1.48728	1.38056	0.908661	1.14461	1.35422	0.714417	1.03432
AEK	2.98609	3.23151	3.1088	3.04908	2.25418	2.65163	1.67264	1.57895	1.6258
AEM	1.78025	2.3982	2.08923	3.60056	1.93485	2.7677	1.20451	3.02234	2.11342
AEL	1.99242	2.32545	2.15893	2.1831	1.93508	2.05909	1.51551	1.51643	1.51597
AEN	2.17536	2.29571	2.23553	2.27794	1.95935	2.11864	1.24956	1.04498	1.14727
VYE	2.46706	2.31011	2.38858	2.04102	2.83338	2.4372	1.32114	0.957583	1.13936
VYK	1.36177	1.32247	1.34212	1.65754	1.66344	1.66049	0.822883	0.677235	0.750059
ETR	3.71376	3.02896	3.37136	3.06383	3.20097	3.1324	1.98718	1.92503	1.9561
KMF	1.89947	1.43546	1.66747	1.71254	1.83954	1.77604	0.674816	2.29452	1.48467
KME	1.97432	2.16041	2.06736	2.39684	2.22318	2.31001	1.13745	1.59088	1.36417
ETQ	2.35994	2.95711	2.65853	2.47567	3.0006	2.73813	1.86649	1.04064	1.45356
ETV	2.7133	3.08702	2.90016	3.07437	2.52375	2.79906	18.1199	19.1771	18.6485
ETT	1.69048	1.63871	1.66459	1.95242	1.92935	1.94088	1.24074	1.37121	1.30598
KMN	1.27491	1.0562	1.16556	1.29846	1.65634	1.4774	0.933362	0.701517	0.817439
ETY	2.93993	3.46552	3.20273	3.38769	2.86464	3.12617	2.28347	2.6876	2.48553
KMK	4.76975	3.57952	4.17464	4.3629	4.14856	4.25573	2.2817	2.82219	2.55195
KMI	1.39301	3.10937	2.25119	1.86895	1.85687	1.86291	2.15664	1.02656	1.5916
KMV	3.11685	3.02755	3.0722	3.46283	2.63488	3.04886	18.4649	20.9271	19.696
ETA	2.40129	2.48789	2.44459	2.81662	2.78568	2.80115	1.23347	1.3394	1.28644
ETF	2.61294	3.03941	2.82618	2.4103	2.94522	2.67776	1.51727	1.4101	1.46369
ETG	3.29922	3.94669	3.62295	3.7743	3.91059	3.84244	2.13966	1.94974	2.0447
ETD	2.65363	2.67902	2.66632	2.61507	2.28439	2.44973	1.89665	2.12392	2.01028
ETE	2.89371	3.7031	3.29841	3.39505	2.87099	3.13302	2.33263	2.57615	2.45439
ETK	2.96523	3.17023	3.06773	3.504	3.56188	3.53294	1.83026	1.4091	1.61968
ETH	0.880406	0.95005	0.915228	1.7655	2.21528	1.99039	0.912894	0.382423	0.647659
ETI	2.41673	2.71134	2.56403	2.66135	2.74437	2.70286	1.50407	1.36895	1.43651
ETN	2.16171	1.61929	1.8905	1.39869	1.60075	1.49972	0.979917	1.21078	1.09535
ETL	1.51891	1.85738	1.68815	1.53675	1.93275	1.73475	1.46323	1.38006	1.42164
ETM	2.25448	2.13046	2.19247	3.20383	3.14679	3.17531	1.78053	1.61559	1.69806
AAI	2.72209	3.65882	3.19046	3.52074	3.23002	3.37538	1.51933	2.1345	1.82691
QNT	2.81892	2.28254	2.55073	3.40673	4.13048	3.7686	1.66483	1.37108	1.51796
QNV	4.1904	5.82724	5.00882	3.50774	4.32857	3.91815	24.6633	23.208	23.9356
QNP	7.92851	7.11748	7.523	6.25934	6.94405	6.6017	2.83272	3.90651	3.36961
QNQ	2.31752	2.26757	2.29254	2.53506	3.33032	2.93269	1.09521	2.73996	1.91759
QNR	6.5385	6.71485	6.62667	6.30489	6.71358	6.50923	4.52325	3.47342	3.99834
QNS	3.49925	3.58615	3.5427	3.49316	3.89983	3.69649	2.11782	2.67639	2.39711
QNY	4.30301	6.81118	5.55709	5.64841	5.09285	5.37063	3.187	2.64034	2.91367
QND	2.97321	3.83316	3.40318	3.33127	3.22299	3.27713	1.52928	1.95658	1.74293
QNE	4.55845	3.80079	4.17962	3.03505	3.98832	3.51168	2.48077	3.2377	2.85923
QNF	2.59011	2.88288	2.73649	2.44228	3.14365	2.79297	1.68525	1.44587	1.56556
QNG	4.33172	4.41761	4.37467	4.39697	4.3026	4.34978	2.67539	2.70178	2.68858
QNA	3.40968	4.42597	3.91782	3.30792	4.14103	3.72447	2.22336	2.52352	2.37344
QNL	2.81948	3.37087	3.09517	2.68542	3.08888	2.88715	2.01057	2.51662	2.2636
QNM	3.52285	2.4412	2.98203	2.44248	2.8685	2.65549	3.30558	1.42062	2.3631
QNN	1.27683	2.42602	1.85142	2.29984	2.08965	2.19475	1.67426	1.44599	1.56013
QNH	3.37808	2.62548	3.00178	2.37014	2.46688	2.41851	2.18195	0.710193	1.44607
QNI	4.07861	4.48744	4.28302	4.96292	4.31379	4.63835	2.78954	2.33106	2.5603
QNK	2.61487	3.05351	2.83419	2.8264	3.13306	2.97973	1.8369	1.4285	1.6327
CVV	0.942145	1.07739	1.00977	1.53293	0.688125	1.11053	8.15282	8.0911	8.12196
CVS	0.680934	0.635929	0.658432	1.32673	1.21488	1.2708	0.606684	0.624491	0.615588
CVL	0.864984	0.46959	0.667287	0.766493	0.955405	0.860949	1.77344	0.790096	1.28177
CVK	1.14253	0.886124	1.01433	1.99856	1.20414	1.60135	0.815659	2.0772	1.44643
CVI	1.50994	0.546862	1.0284	0.941781	1.20339	1.07258	1.80309	0.615211	1.20915
CVG	1.31999	0.833574	1.07678	2.00874	1.49246	1.7506	1.48795	2.15572	1.82183
CVD	1.01834	0.400899	0.709619	1.03855	0.509669	0.774108	0.332264	0.400777	0.36652
CVE	1.13826	1.64178	1.39002	2.24769	1.03625	1.64197	0.686976	1.55656	1.12177
CVA	1.26177	1.33519	1.29848	1.20136	1.05573	1.12854	1.64769	1.26011	1.4539
WDD	3.12558	2.16006	2.64282	2.03698	2.68379	2.36038	1.97034	1.91341	1.94188
WDE	3.78254	3.70553	3.74403	2.67177	4.43856	3.55516	2.37635	0.9578	1.66708
WDI	2.0415	2.478	2.25975	3.6504	1.80556	2.72798	1.29353	1.24464	1.26909
WDK	5.6703	7.61923	6.64477	7.13548	7.28958	7.21253	3.82482	4.09426	3.95954
WDL	3.32622	2.64766	2.98694	2.74977	2.51681	2.63329	0.967811	1.48807	1.22794
WDS	3.11037	3.11363	3.112	2.68998	3.62136	3.15567	2.33047	1.82997	2.08022
WDT	1.89273	2.41256	2.15264	2.47285	2.48328	2.47807	1.55021	1.12744	1.33882
WDV	2.63508	3.90849	3.27179	2.62657	3.05702	2.84179	17.4501	16.5448	16.9975
EKG	8.07625	8.47525	8.27575	7.46364	8.17356	7.8186	4.94976	4.35295	4.65136
RES	1.35306	1.88021	1.61664	1.7455	1.872	1.80875	0.776069	0.815645	0.795857
REP	4.61906	3.61236	4.11571	4.69918	3.4565	4.07784	2.48739	1.99883	2.24311
EKD	2.33244	2.18694	2.25969	2.28102	2.60347	2.44225	1.33361	1.39923	1.36642
EKC	3.23123	2.87506	3.05314	2.72007	1.51024	2.11515	1.055	2.42994	1.74247
MDF	2.87183	3.25916	3.0655	2.46744	2.49214	2.47979	1.87548	2.35279	2.11413
EKA	3.45705	3.84967	3.65336	2.96763	3.63799	3.30281	2.42901	2.27756	2.35329
REL	1.54944	1.7825	1.66597	1.80766	2.12999	1.96882	1.0094	0.9151	0.96225
REA	2.24645	2.009	2.12773	2.06866	1.9309	1.99978	1.44897	1.45909	1.45403
EKS	2.18037	2.75609	2.46823	1.89856	2.65015	2.27436	2.03936	1.39973	1.71955
REG	2.82727	2.3213	2.57429	2.42097	2.9729	2.69694	1.90274	2.12043	2.01158
RED	1.53783	1.93688	1.73736	1.88957	2.25422	2.0719	1.10072	1.54096	1.32084
EKP	3.43177	2.57959	3.00568	3.43424	2.5462	2.99022	1.88776	2.32332	2.10554
LFE	2.60712	3.05643	2.83178	2.49902	3.22991	2.86447	1.65195	1.84241	1.74718
LFG	2.72023	3.6254	3.17282	3.05883	3.13139	3.09511	1.90868	2.04249	1.97559
LFF	2.68735	2.74782	2.71758	1.97218	1.59507	1.78362	1.3492	0.831802	1.0905
YQL	1.87265	1.41822	1.64543	1.43011	1.4485	1.4393	1.21887	0.955405	1.08714
YQN	2.35499	2.83994	2.59746	2.91984	1.68612	2.30298	1.34571	0.879159	1.11244
YQI	2.86934	3.15687	3.0131	3.00343	2.71816	2.8608	1.70635	1.09332	1.39983
YQK	3.45111	2.82783	3.13947	3.22659	3.72729	3.47694	1.98498	2.06065	2.02281
YQE	3.10327	3.53003	3.31665	2.96357	3.73586	3.34971	1.8222	2.00337	1.91279
YQD	2.39202	2.47353	2.43278	2.93152	2.55282	2.74217	1.19481	0.928568	1.06169
YQG	4.24307	4.34802	4.29554	3.16531	4.84305	4.00418	2.04597	1.35194	1.69896
YQF	2.45931	2.30816	2.38374	2.43499	2.04796	2.24147	1.40159	1.16808	1.28484
YQA	3.06774	3.5261	3.29692	3.44003	3.22964	3.33483	1.51491	1.77227	1.64359
YQY	3.22756	3.57086	3.39921	3.32988	3.45927	3.39458	1.39556	1.44565	1.42061
YQT	1.23895	1.48134	1.36015	1.86414	2.47768	2.17091	1.07219	2.69124	1.88171
YQV	3.13705	3.00271	3.06988	3.25491	3.04405	3.14948	22.7614	17.9237	20.3426
YQQ	1.3886	2.81127	2.09994	2.25282	1.75109	2.00196	1.38181	1.01584	1.19882
YQP	5.23996	3.65566	4.44781	3.60844	3.83207	3.72025	1.76927	1.23929	1.50428
YQS	2.73288	2.19355	2.46321	2.14177	3.03233	2.58705	2.28237	1.35946	1.82092
YQR	5.2711	4.7392	5.00515	4.56307	3.63912	4.1011	1.70277	2.18456	1.94367
LFQ	1.733	1.37263	1.55282	1.98168	1.56407	1.77287	0.848044	1.5286	1.18832
LFS	2.08897	2.47033	2.27965	2.91101	2.49805	2.70453	1.69225	1.43466	1.56345
FCG	4.37082	2.97391	3.67236	1.64059	4.41806	3.02932	0.918206	1.41344	1.16582
GFY	3.07607	4.31398	3.69502	2.82754	4.07657	3.45205	2.16036	2.78512	2.47274
FCL	1.4961	2.96393	2.23002	1.99957	2.08804	2.0438	1.27429	0.618803	0.946547
TWE	1.88868	2.35062	2.11965	1.82796	2.35345	2.09071	1.45233	1.10833	1.28033
HQP	4.22036	5.12573	4.67305	4.15764	3.62931	3.89347	3.85732	4.55848	4.2079
HQQ	2.61799	2.06528	2.34163	2.64506	2.60201	2.62353	2.30769	1.2295	1.76859
HQR	3.85564	3.08507	3.47036	3.4622	4.63988	4.05104	4.537	2.00039	3.26869
HQT	3.53759	1.70626	2.62193	3.07649	1.86378	2.47013	1.33055	1.73289	1.53172
HQV	4.94449	4.89475	4.91962	4.67249	3.46099	4.06674	20.8499	22.0955	21.4727
TWS	1.78599	2.72768	2.25683	2.19743	1.69314	1.94528	0.768082	1.65241	1.21025
HQK	5.56532	5.07361	5.31946	2.47912	3.2	2.83956	1.23992	2.23612	1.73802
HQL	2.10794	2.08051	2.09423	3.09457	2.19371	2.64414	1.29387	1.82638	1.56013
HQN	1.85473	3.69705	2.77589	1.68147	1.64234	1.6619	1.23345	0.9417	1.08757
HQA	3.7459	3.53155	3.63872	2.92629	3.01114	2.96872	2.36016	2.62519	2.49267
HQD	1.67427	1.73437	1.70432	1.2452	1.79802	1.52161	1.47168	1.91879	1.69523
HQE	3.65239	3.83508	3.74373	2.95954	3	2.97977	2.51413	1.68989	2.10201
VSP	3.90921	3.415	3.66211	4.10002	3.81877	3.95939	2.11965	2.06256	2.0911
VSQ	2.12629	1.65059	1.88844	2.01713	2.00204	2.00959	1.02978	0.847815	0.938796
VSR	2.0741	2.32351	2.1988	2.30623	2.47572	2.39098	1.06998	1.49649	1.28324
VSS	2.00881	2.26064	2.13472	2.38691	2.12527	2.25609	1.17802	1.27781	1.22792
VST	2.06035	2.02611	2.04323	2.40538	1.45631	1.93085	1.06611	1.12468	1.09539
VSV	2.68729	2.57807	2.63268	2.84391	2.69655	2.77023	12.562	13.6335	13.0978
VSW	2.96868	2.54695	2.75781	3.21683	4.47865	3.84774	2.00514	1.49055	1.74785
VSY	3.75361	3.57474	3.66418	3.74583	3.77516	3.7605	1.3756	1.76628	1.57094
VSA	2.49442	2.5422	2.51831	2.79864	2.48453	2.64158	1.50487	1.59224	1.54855
VSC	2.36565	1.81451	2.09008	3.04209	1.66039	2.35124	1.36154	1.99374	1.67764
VSD	2.35328	2.67829	2.51579	2.6177	2.43647	2.52709	0.966902	1.43026	1.19858
VSE	3.82559	3.7758	3.80069	2.62393	3.72679	3.17536	1.70148	1.65663	1.67906
VSF	2.17144	1.7782	1.97482	2.19384	2.4368	2.31532	1.3966	1.5648	1.4807
VSG	2.30233	2.84159	2.57196	3.47947	2.34622	2.91285	1.94844	1.57514	1.76179
VSH	0.711977	0.841521	0.776749	1.17774	0.970129	1.07394	0.247413	0.302274	0.274843
VSI	2.19341	2.63891	2.41616	3.05804	2.81701	2.93753	1.57199	1.92193	1.74696
VSK	1.91485	2.45073	2.18279	2.62065	1.96565	2.29315	1.09215	1.19699	1.14457
VSL	2.18964	2.01716	2.1034	2.38633	2.07974	2.23304	1.25522	1.23895	1.24708
VSM	1.97055	2.36147	2.16601	2.57137	1.90629	2.23883	1.05583	1.38418	1.22
VSN	2.01802	2.14854	2.08328	2.20273	1.86224	2.03249	0.921159	1.01807	0.969612
RYN	1.31253	1.54253	1.42753	2.1721	1.81505	1.99357	0.483371	1.40319	0.943279
RYL	1.36331	1.69199	1.52765	1.85181	2.02054	1.93618	0.937669	0.940596	0.939133
RYK	7.05038	6.91752	6.98395	7.99754	7.50607	7.7518	4.34919	4.32491	4.33705
RYH	0.532567	0.64182	0.587193	0.81765	0.248107	0.532878	0.831594	0.913398	0.872496
RYI	3.40961	2.42404	2.91682	2.62251	2.43689	2.5297	0.906722	1.2679	1.08731
RYF	1.49744	1.54897	1.5232	2.31733	1.64046	1.9789	1.38932	1.22791	1.30862
RYG	3.30587	3.07431	3.19009	3.13214	1.81777	2.47496	1.17714	1.43895	1.30805
RYD	1.44978	1.7801	1.61494	1.33014	2.23091	1.78052	1.19171	1.11583	1.15377
RYE	3.09391	2.95065	3.02228	2.58272	2.29579	2.43925	1.45288	1.12531	1.28909
RYA	2.56631	2.24089	2.4036	2.20217	2.6444	2.42329	0.971562	1.78709	1.37933
RYY	3.01377	4.1607	3.58724	2.65133	3.72627	3.1888	1.70386	2.00602	1.85494
RYV	2.59217	2.9345	2.76334	2.29531	2.69719	2.49625	17.3257	16.9065	17.1161
RYT	0.916936	1.14615	1.03154	1.13985	1.52102	1.33043	1.09746	0.891348	0.994403
RYR	4.82589	3.13127	3.97858	3.68027	4.01914	3.8497	2.28139	2.9419	2.61164
RYS	2.14573	1.81786	1.98179	2.44066	3.27535	2.85801	1.09385	1.78733	1.44059
RYP	2.58312	1.71358	2.14835	2.62821	2.1825	2.40536	1.61795	1.5289	1.57343
RYQ	3.15838	1.65788	2.40813	1.85207	2.41225	2.13216	0.495706	1.51922	1.00746
QQE	2.89186	4.10629	3.49908	2.96453	3.10877	3.03665	2.71592	2.32792	2.52192
QQD	2.45522	1.91933	2.18728	1.73142	2.1172	1.92431	2.06147	0.755655	1.40856
QQG	4.1189	4.24095	4.17992	3.23001	3.22121	3.22561	2.26677	1.88055	2.07366
QQF	2.87111	2.82462	2.84786	3.19896	3.58811	3.39353	2.03918	2.81996	2.42957
QQA	3.56903	3.21238	3.39071	2.56471	3.00659	2.78565	2.09182	2.0403	2.06606
QQM	2.29282	3.81692	3.05487	1.60956	3.20248	2.40602	1.5491	1.4342	1.49165
QQL	1.98493	2.21929	2.10211	2.08351	2.41818	2.25085	1.3977	1.55518	1.47644
[truncated: 4,268 more rows]
